# Supplementary material for: CCDC32 stabilizes clathrin-coated pits and drives their invagination
Source: eLife journal article supplement (doi:10.7554/elife.107039), 2025-06-11
Supplement: fig1-figsupp1-data1 [file Figure supplement 1-Source Data 1.pdf › Figure 1-figure supplement 1-source data 1/Figure supplement 1-Source Data 1.pdf]

# Figure supplement 1A

## Vinculin

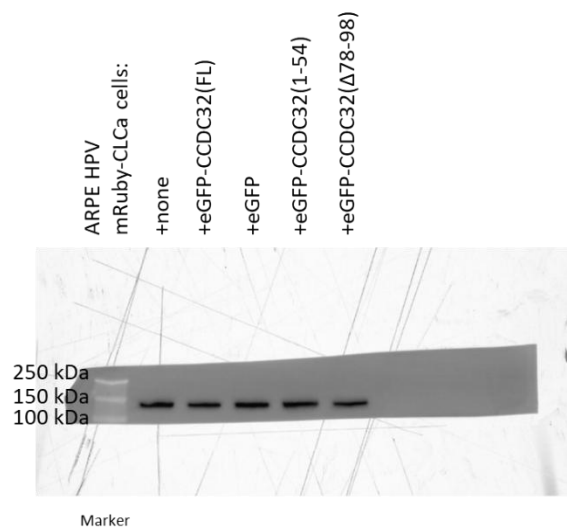

## GFP

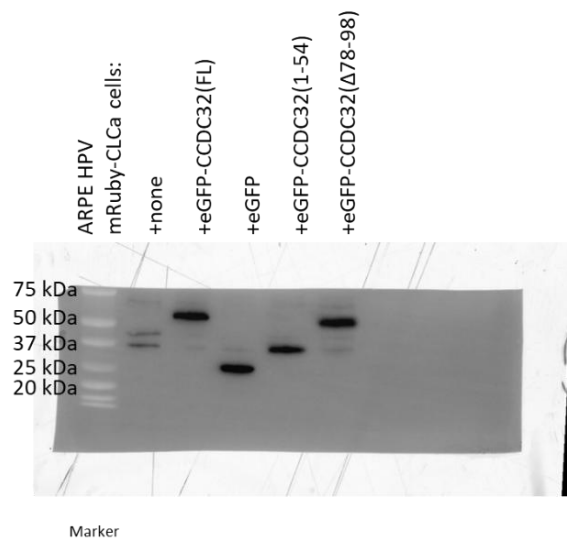

# Figure supplement 1B

## Vinculin

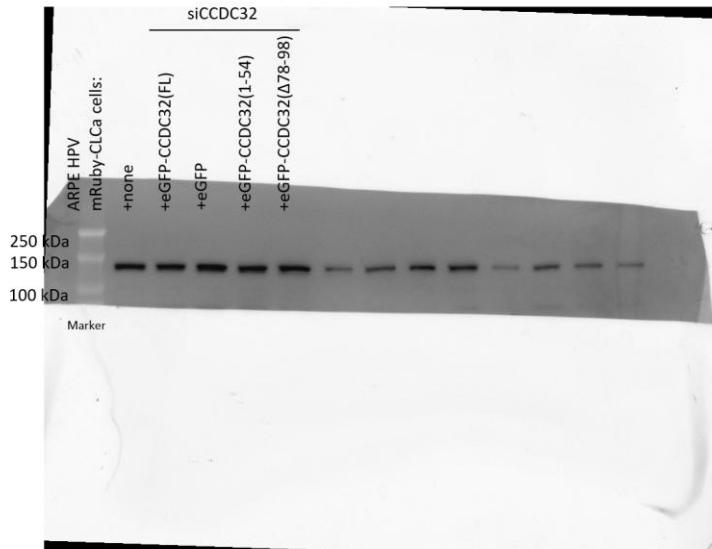

## CCDC32

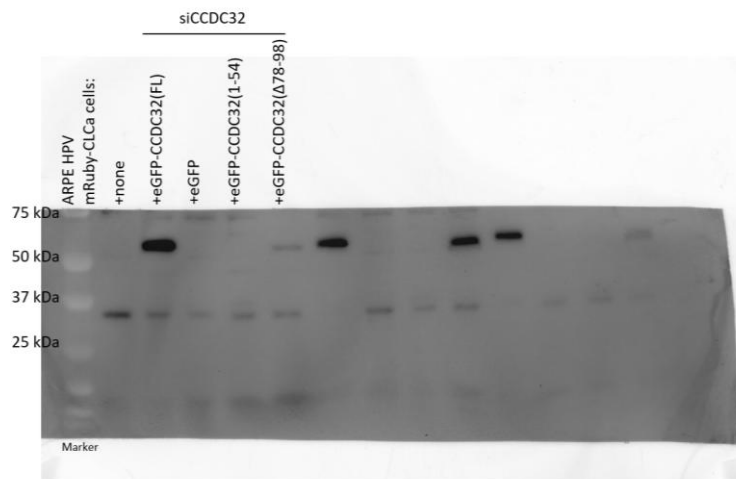

Figure supplement 1

(A) Western blotting indicates similar expression levels of exogenous eGFP-CCDC32(FL), eGFP, eGFP-CCDC32(1-54) and eGFP-CCDC32(Δ78-98) in ARPE-HPV mRuby-CLCa cells.

(B) siCCDC32 knocked down endogenous CCDC32 but not exogenously introduced eGFP-CCDC32(FL) from ARPE-HPV mRuby-CLCa cells. Note that the anti-CCDC32 antibody does not detect the eGFP-CCDC32(Δ78-98) as well as full-length and is unable to detect eGFP-CCDC32(1-54).
