# Supplementary material for: CCDC32 stabilizes clathrin-coated pits and drives their invagination
Source: eLife journal article supplement (doi:10.7554/elife.107039), 2025-06-11
Supplement: fig2-data2 [file Figure 2-Source Data 2.pdf › Figure 2-Source Data 2/Figure 2-Source Data 2.pdf]

2A

Vinculin、CCDC32

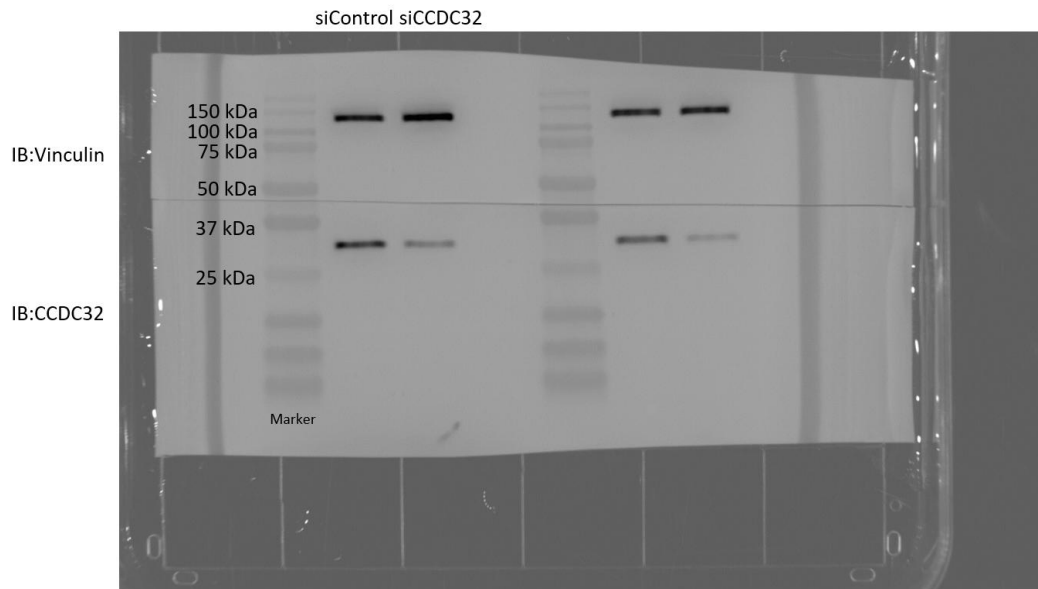

Figure 2

(A) Immunoblotting (IB) shows efficient CCDC32 knockdown in ARPE-HPV cells by siRNA treatment.
