# Supplementary material for: CCDC32 stabilizes clathrin-coated pits and drives their invagination
Source: eLife journal article supplement (doi:10.7554/elife.107039), 2025-06-11
Supplement: fig2-figsupp1-data2 [file Figure 2-figure supplement 1-source data 2.pdf › Figure 2-figure supplement 1-source data 2/Figure 2-figure supplement 1-source data 2.pdf]

# supplement 1A

## Vinculin

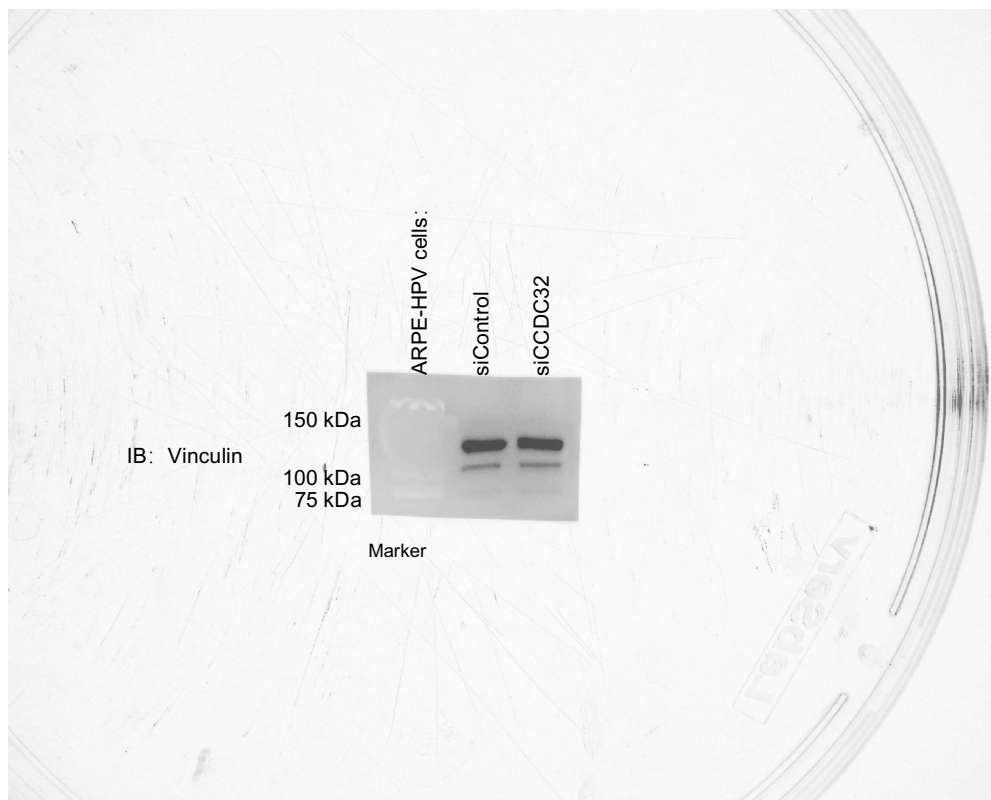

## AP2- $\alpha$

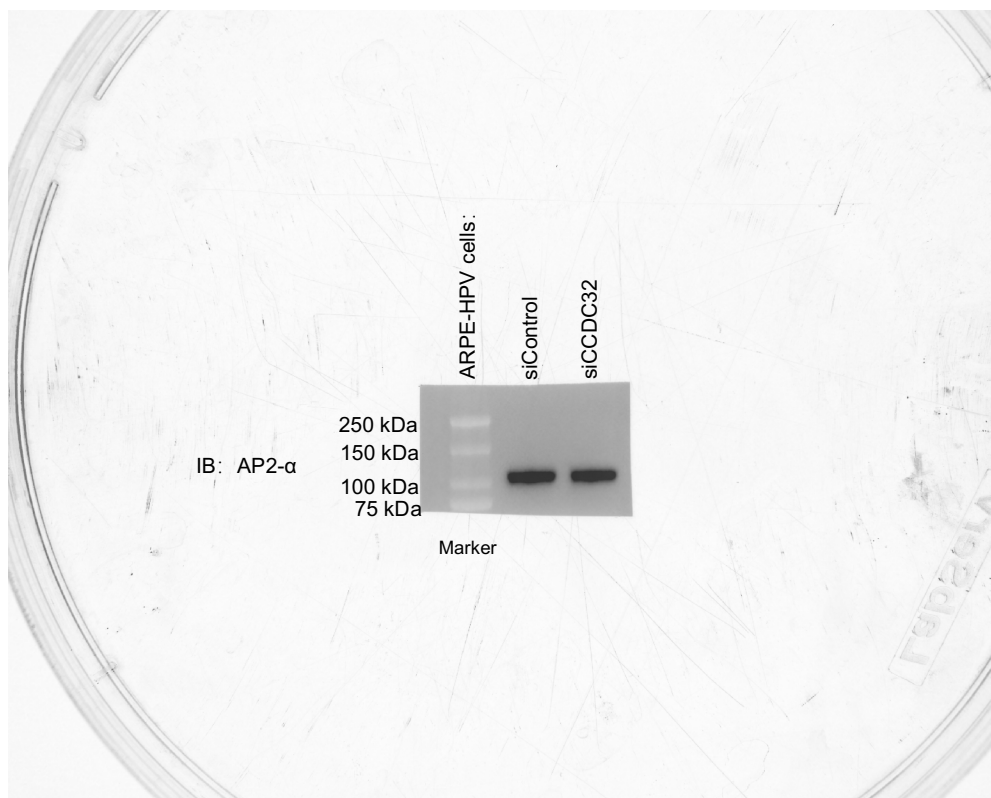

## AP2- $\beta$

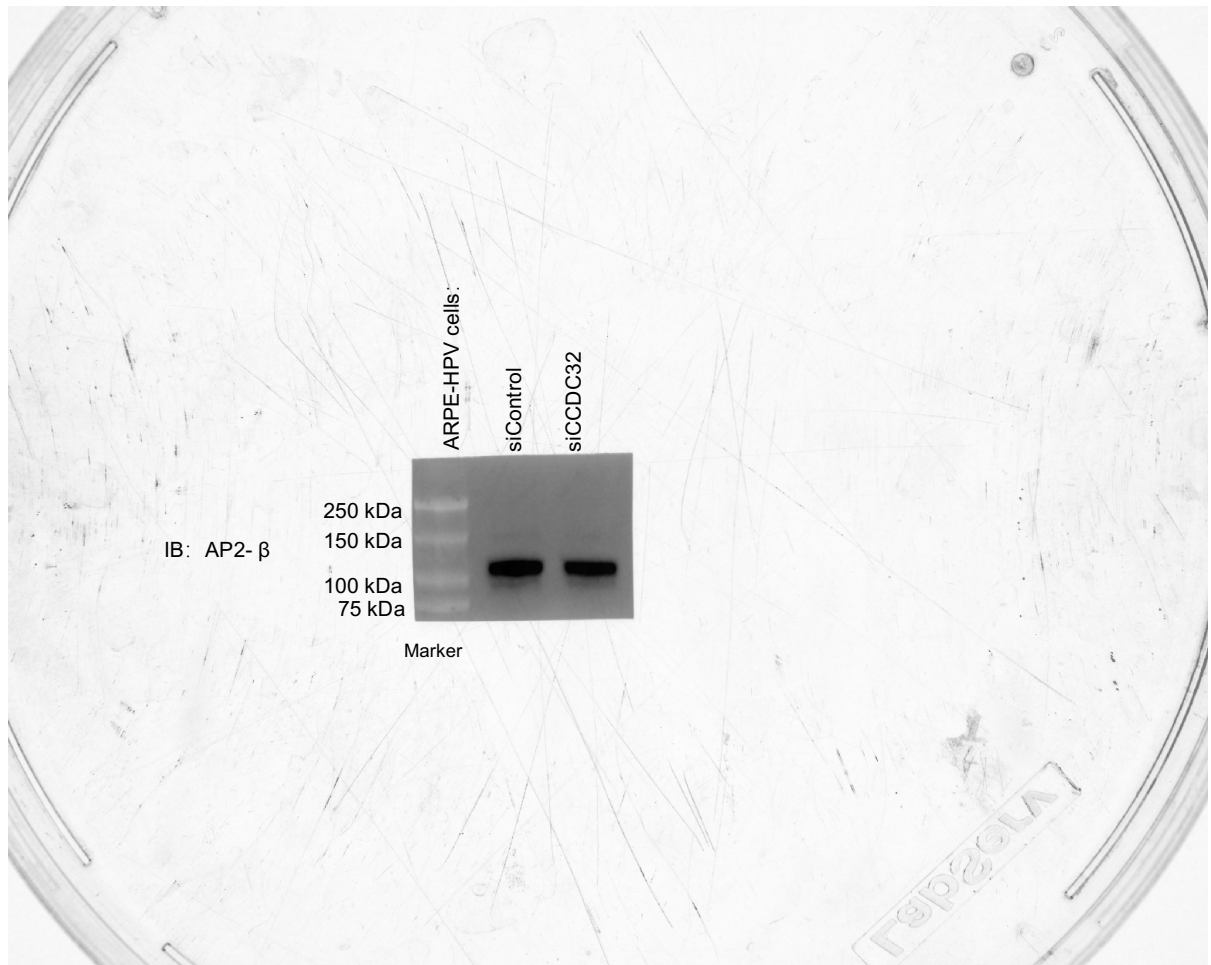

## AP2- $\mu$

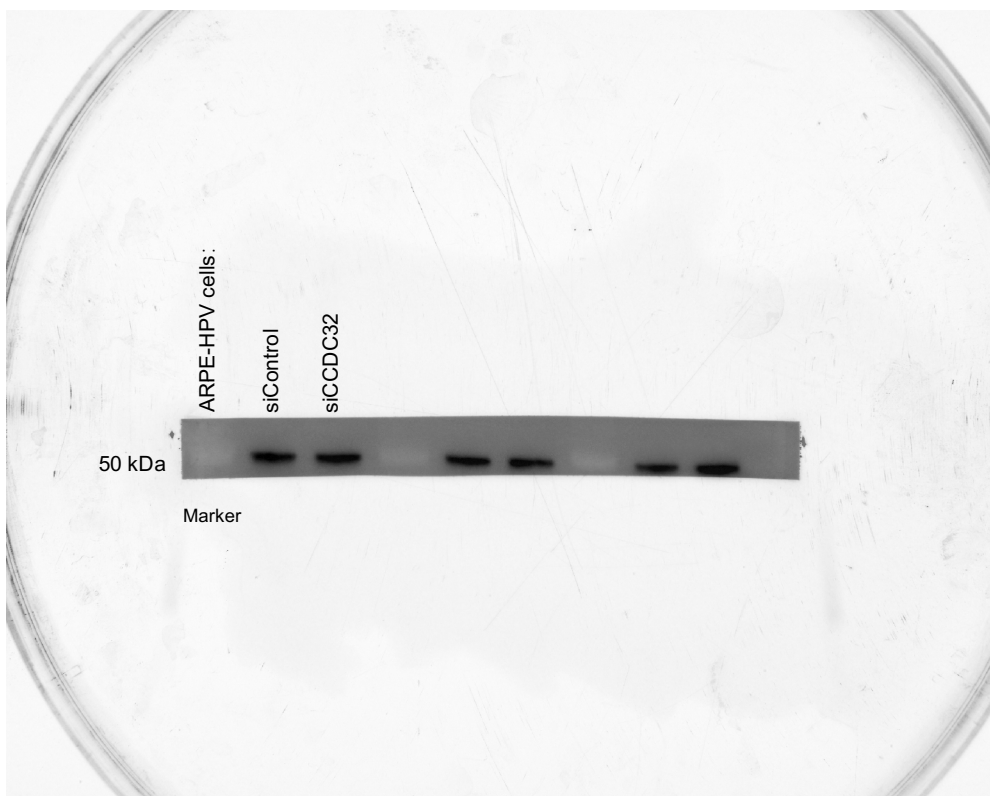

## Ap2- $\sigma$

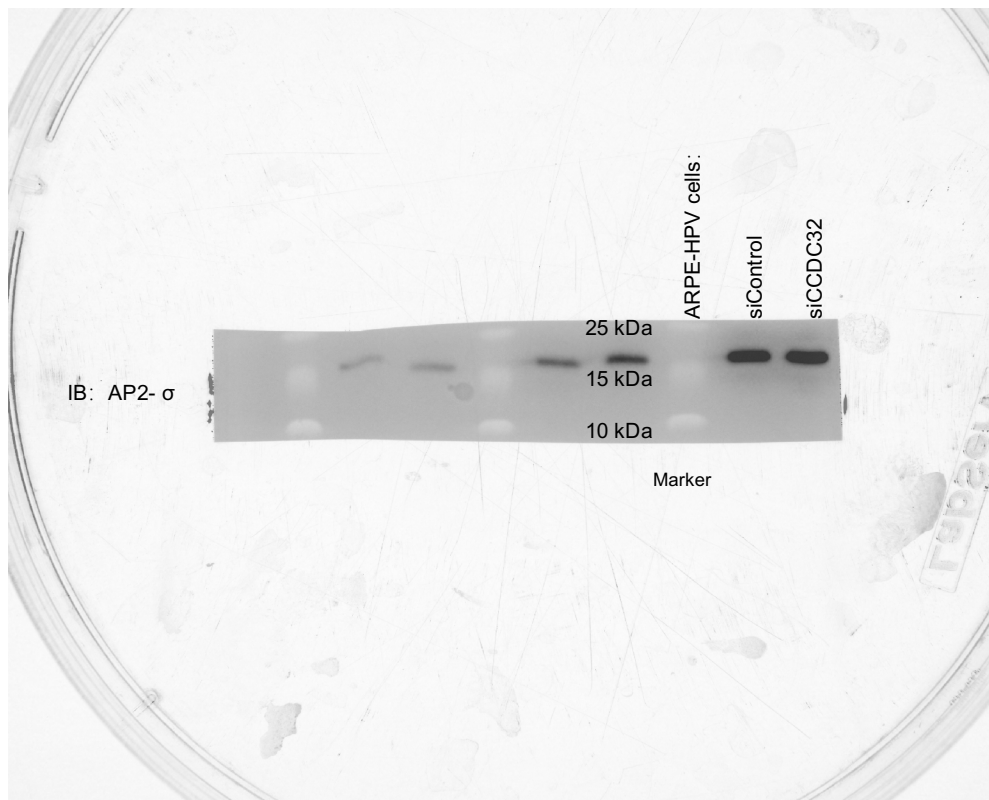

### supplement 1

(A) Representative immunoblotting result of AP2 subunits from n=3 biological repeats. Error bars indicate standard deviations. Statistical analysis is student's t-test: ns, not significant.
