# Supplementary material for: CCDC32 stabilizes clathrin-coated pits and drives their invagination
Source: eLife journal article supplement (doi:10.7554/elife.107039), 2025-06-11
Supplement: fig5-data3 [file Figure 5-source data 3.pdf › Figure 5-source data 3/Figure 5-source data 3.pdf]

5E

AP2- $\alpha$ 、GFP

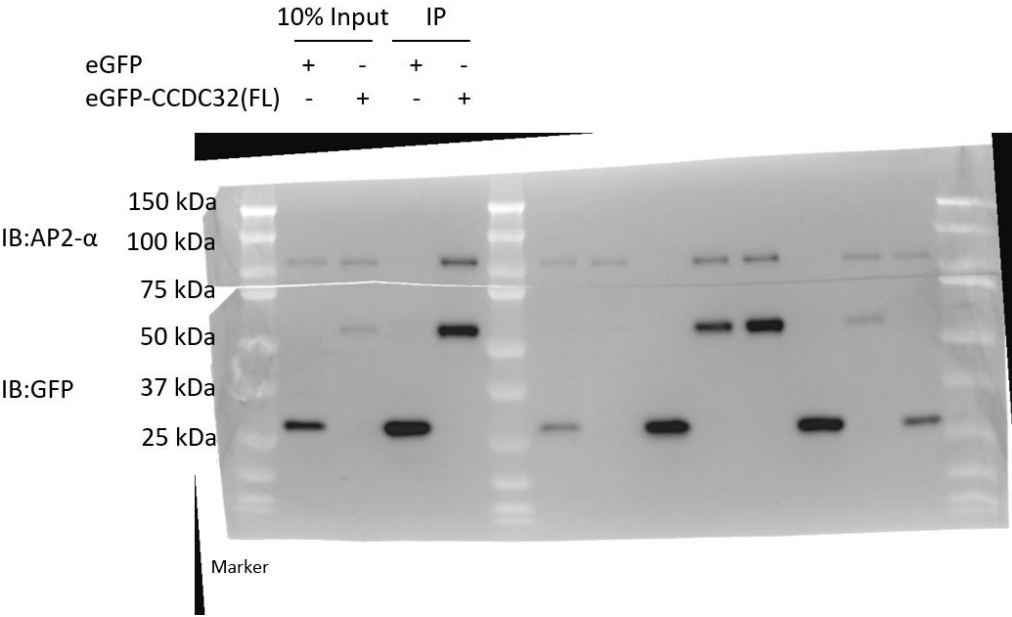

5G

Coomassie stained

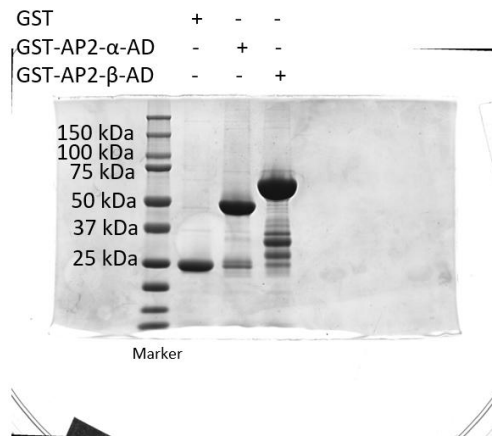

5H

GFP

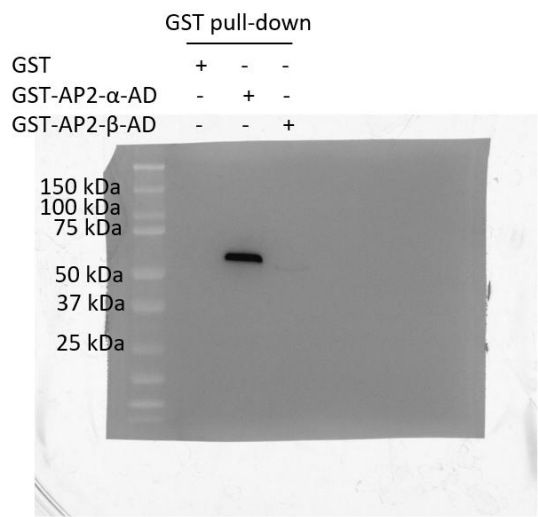

Figure 5

- (E) Representative immunoblotting result of n=3 IP samples.
- (G) Quantification of immunoblots of the relative enrichment of CCDC32.
- (H) Coomassie blue stained SDS-page gel of purified GST, GST-AP2- $\alpha$ -AD, and GST-AP2- $\beta$ -AD.
