# Supplementary material for: CCDC32 stabilizes clathrin-coated pits and drives their invagination
Source: eLife journal article supplement (doi:10.7554/elife.107039), 2025-06-11
Supplement: fig5-figsupp1-data1 [file Figure 5-figure supplement 1-source data 1.pdf › Figure 5-figure supplement 1-source data 1/Figure 5-figure supplement 1-source data 1.pdf]

# supplement 1

AP2- $\alpha$

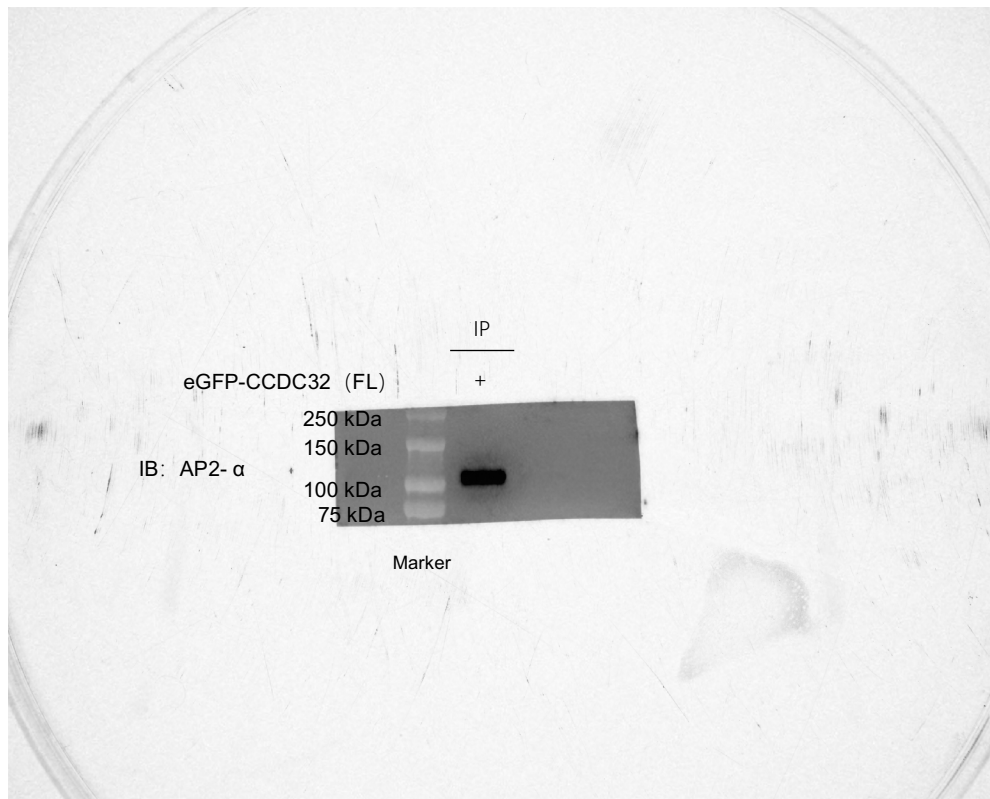

AP2- $\beta$

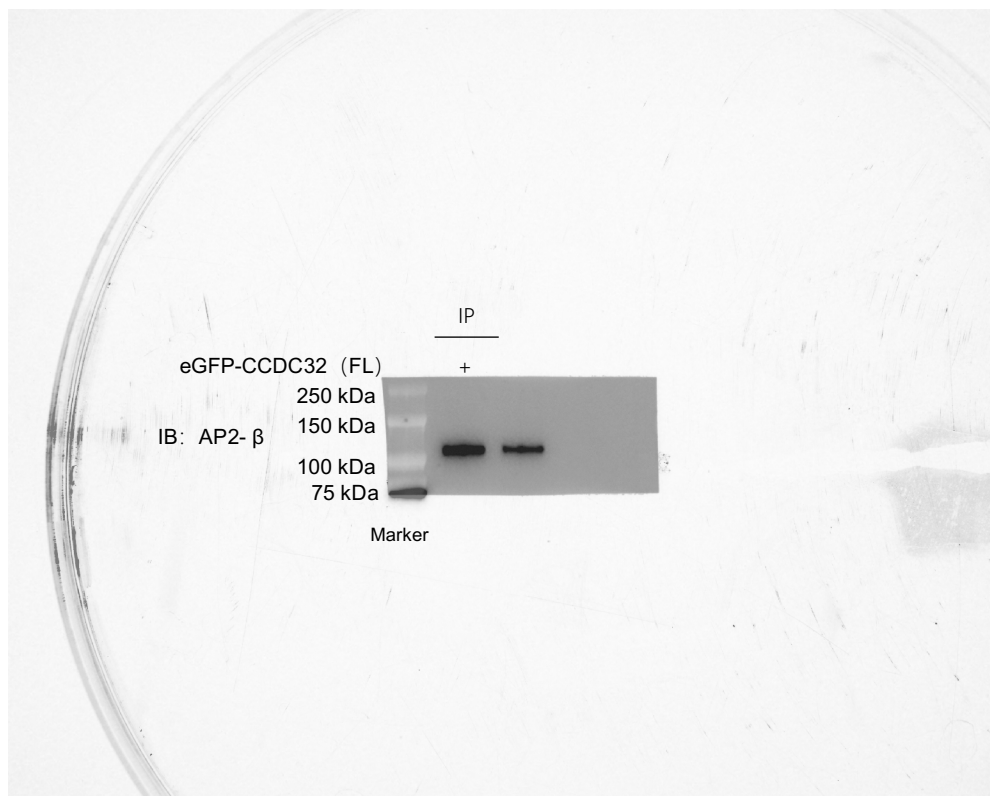

## AP2- $\mu$

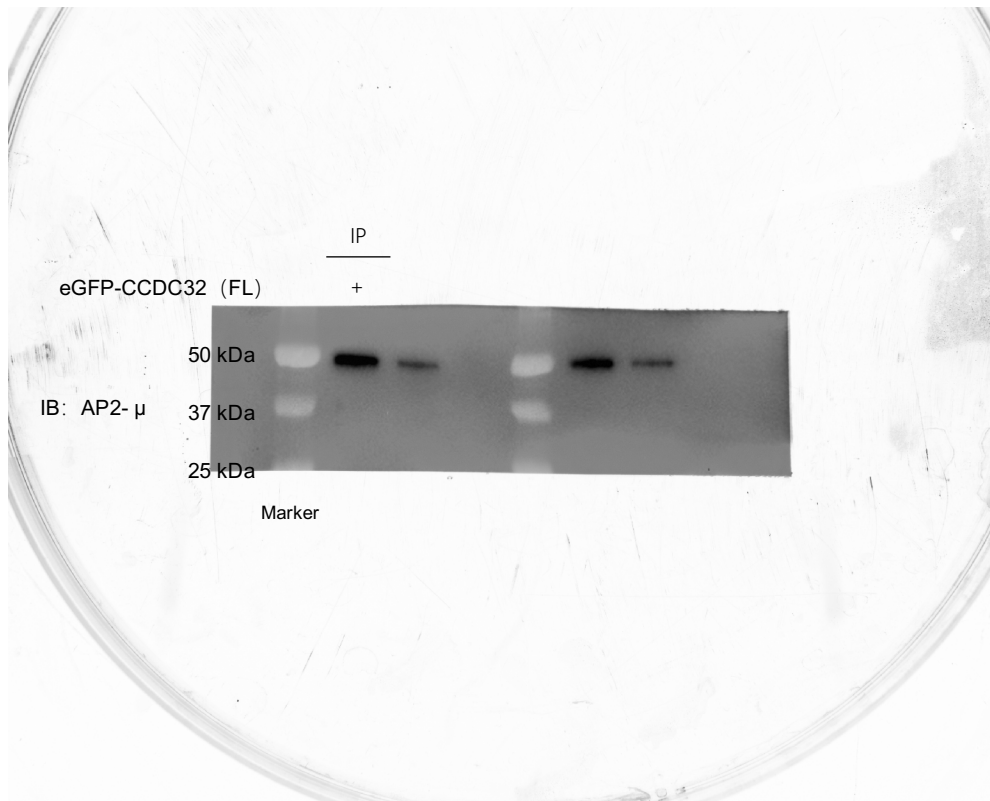

## Ap2- $\sigma$

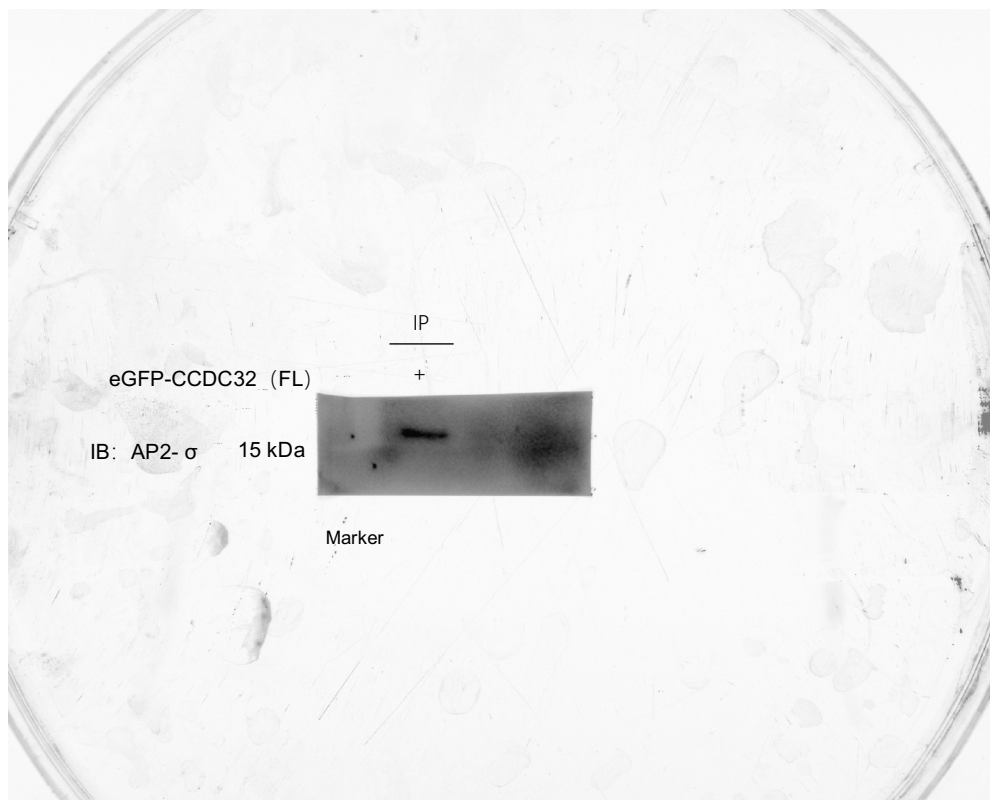

## Figure supplement 1

All the four subunits of intact AP2 efficiently co-IP with eGFPCCDC32(FL).
