# Supplementary material for: CCDC32 stabilizes clathrin-coated pits and drives their invagination
Source: eLife journal article supplement (doi:10.7554/elife.107039), 2025-06-11
Supplement: fig6-data2 [file Figure 6-source data 2.pdf › Figure 6-source data 2/Figure 6-source data 2.pdf]

6B-left

AP2- $\alpha$ 、GFP

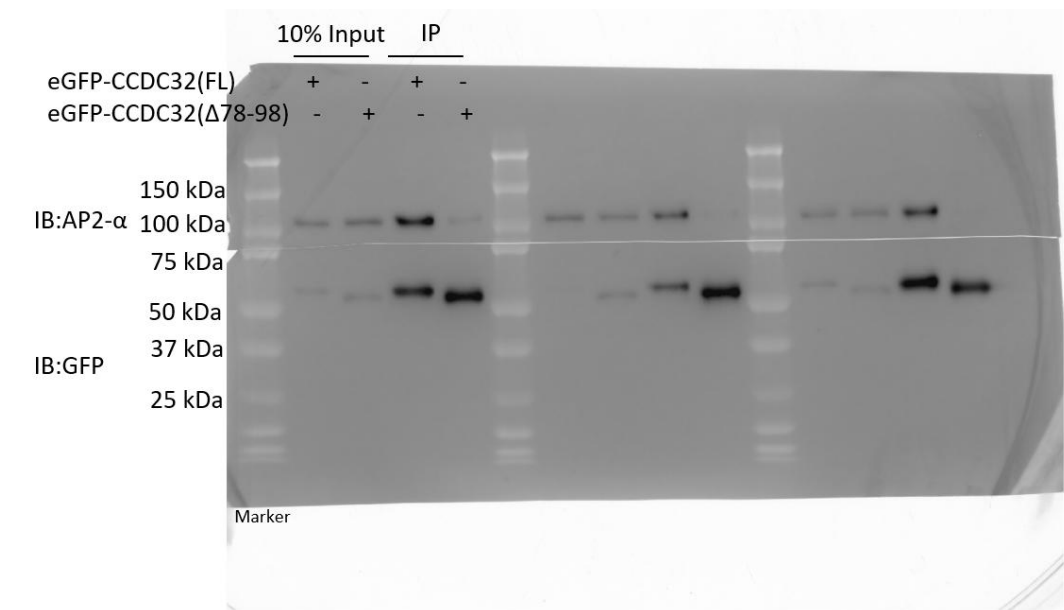

# 6B\_right

AP2-β

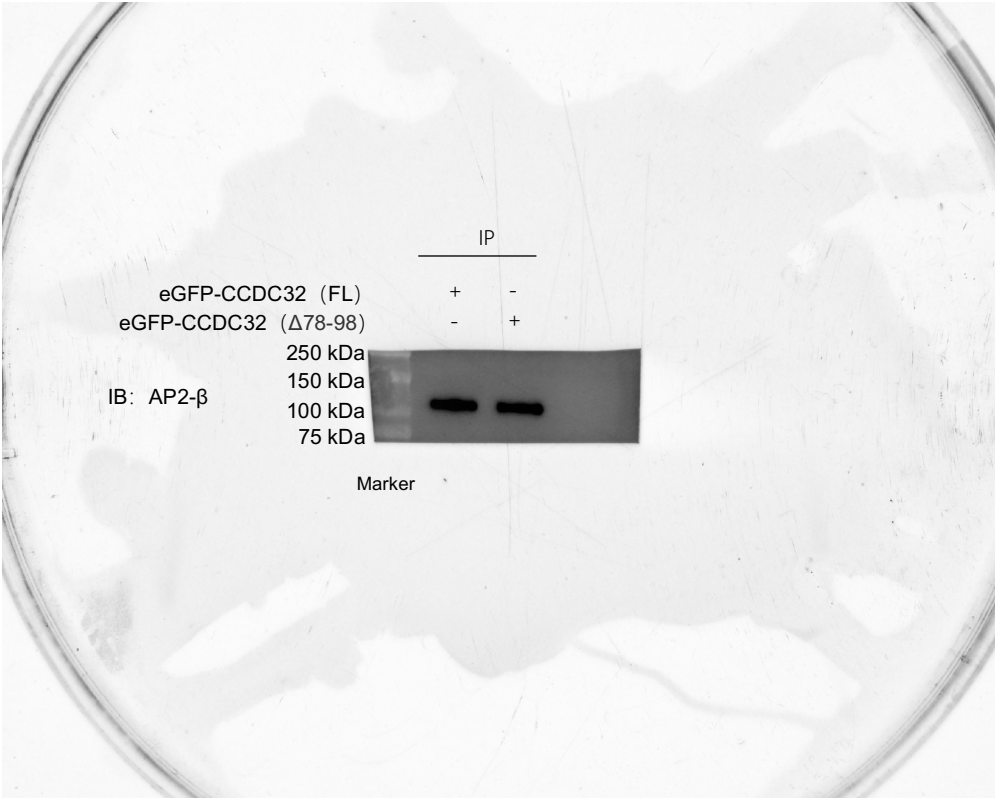

AP2-μ

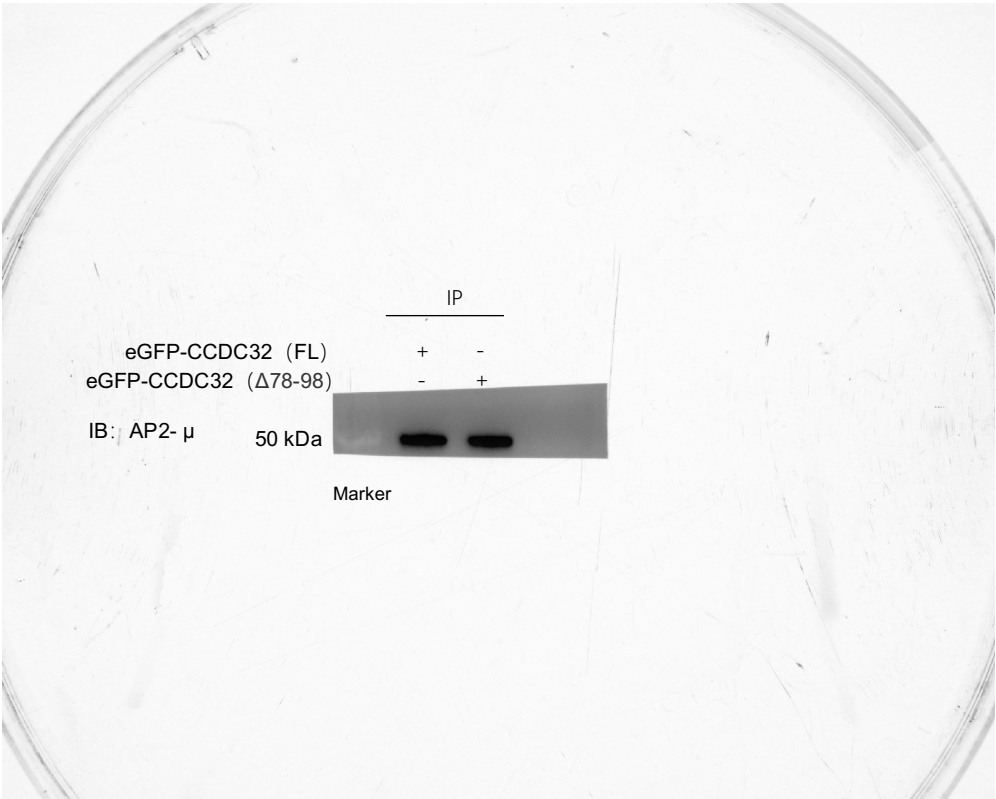

Ap2- $\sigma$

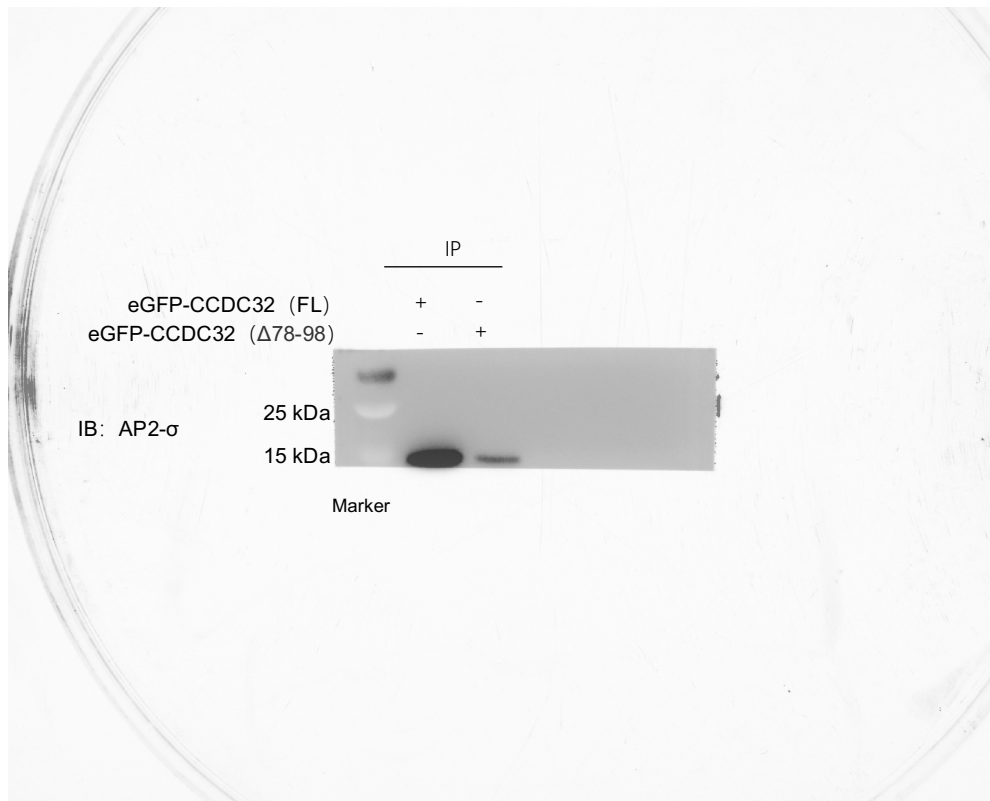

Figure 6

(B) Representative Immunoblotting result of n=3 IP samples.
