# Supplementary material for: CCDC32 stabilizes clathrin-coated pits and drives their invagination
Source: eLife. 2026 Jan 5;14:RP107039. doi: 10.7554/eLife.107039 (PMC12768407; doi:10.7554/eLife.107039)
Supplement: Figure 1—figure supplement 2—source data 1. [file elife-107039-fig1-figsupp2-data1.xlsx]

## Sheet: Tabelle1
	Figure 1-figure supplement 2-Source Data 1: Numerical data used to generate Figure 1-figure supplement 2.
	Figure 1-figure supplement 2B
	Time(s)	CLCa			eGFP
		Mean	Upper Limit	Lower Limit	Mean	Upper Limit	Lower Limit
	-10	9.98729	10.8442	9.13035	1.83078	2.25618	1.40537
	-8	11.0012	12.0884	9.91396	1.65133	1.89942	1.40324
	-6	10.9933	12.0653	9.92127	1.9605	2.13742	1.78357
	-4	11.278	11.9796	10.5765	1.6172	2.01668	1.21772
	-2	15.0704	15.8038	14.337	1.57505	1.83649	1.31361
	0	25.0544	25.7906	24.3182	2.14185	2.34477	1.93892
	2	28.5396	29.7062	27.3731	2.03691	2.2755	1.79832
	4	32.1873	33.6214	30.7532	2.06375	2.29341	1.83409
	6	35.4976	36.6114	34.3837	2.62884	2.88934	2.36834
	8	38.8851	39.7475	38.0228	2.68965	2.99177	2.38753
	10	42.4461	43.6717	41.2206	2.4646	2.65253	2.27667
	12	46.2067	47.6204	44.7929	2.67783	2.79364	2.56203
	14	48.2742	49.7042	46.8441	2.55775	2.79873	2.31677
	16	49.689	51.2315	48.1465	2.23603	2.44878	2.02328
	18	52.3207	53.7858	50.8556	2.32724	2.53196	2.12251
	20	54.2739	55.5672	52.9807	2.22551	2.49628	1.95474
	22	55.508	56.8455	54.1705	2.27543	2.54289	2.00797
	24	55.3052	56.4161	54.1942	2.09518	2.33445	1.85591
	26	56.4485	57.7174	55.1796	2.44011	2.61801	2.26222
	28	56.3613	57.9577	54.7649	2.27066	2.59199	1.94933
	30	57.369	58.971	55.7671	2.22984	2.41934	2.04035
	32	57.5887	58.5333	56.6441	2.26307	2.4884	2.03773
	34	57.4461	58.8104	56.0818	2.55563	2.7728	2.33846
	36	56.0956	57.7758	54.4154	1.98067	2.24868	1.71265
	38	55.3022	56.8508	53.7536	2.56858	2.74133	2.39582
	40	54.259	55.3374	53.1807	2.34109	2.54503	2.13714
	42	52.0886	52.8094	51.3677	2.41372	2.66564	2.16179
	44	48.0896	49.3795	46.7997	2.61078	2.78654	2.43502
	46	44.2466	46.1026	42.3905	2.40099	2.68847	2.11351
	48	33.3101	34.1606	32.4596	2.2181	2.5648	1.87139
	50	11.9712	12.8931	11.0493	1.57874	1.91616	1.24132
	52	7.79583	8.54597	7.04569	1.80476	2.03429	1.57523
	54	6.46543	7.27429	5.65657	1.84385	2.17236	1.51534
	56	5.81681	6.76089	4.87273	1.9039	2.22675	1.58105
	58	6.54284	7.36569	5.71998	1.55754	1.86844	1.24663
