# Supplementary material for: CCDC32 stabilizes clathrin-coated pits and drives their invagination
Source: eLife. 2026 Jan 5;14:RP107039. doi: 10.7554/eLife.107039 (PMC12768407; doi:10.7554/eLife.107039)
Supplement: Figure 1—source data 1. [file elife-107039-fig1-data1.xlsx]

## Sheet: Tabelle1
Figure 1-Source Data 1: Numerical data used to generate Figure 1
Figure 1B								Figure 1C
Time(s)	CLCa			eGFP-CCDC32(FL)				Time(s)	All CCPs	(+)GFP-CCDC32	(-)GFP-CCDC33
	Mean	Upper Limit	Lower Limit	Mean	Upper Limit	Lower Limit		10	0.0131726	0.00086	0.013711
-10	19.141	20.5059	17.7761	7.13924	7.54383	6.73466		12	0.0135155	0.001032	0.0138337
-8	18.9402	20.2446	17.6357	7.32574	7.73272	6.91875		14	0.0138463	0.00095	0.0144668
-6	18.2504	19.458	17.0427	7.71246	8.10773	7.31718		16	0.015682	0.001367	0.0158964
-4	19.096	20.18	18.0121	7.88971	8.25027	7.52915		18	0.0167543	0.002348	0.0160866
-2	22.1256	23.2183	21.033	8.18958	8.51412	7.86504		20	0.01602	0.00238	0.0154732
0	34.2243	35.3548	33.0939	7.94469	8.24162	7.64775		22	0.0154911	0.001998	0.0150257
2	37.2565	38.4804	36.0326	8.56259	8.8358	8.28938		24	0.0132929	0.002095	0.0123798
4	38.4161	39.5761	37.2562	9.07073	9.37926	8.7622		26	0.0157519	0.003034	0.0144625
6	41.9318	42.9701	40.8935	9.31141	9.61042	9.01239		28	0.0163226	0.004324	0.0135845
8	45.266	46.344	44.1879	9.92869	10.1852	9.6722		30	0.0206086	0.005247	0.0172455
10	48.2832	49.2469	47.3195	10.3422	10.6007	10.0838		32	0.0205265	0.005233	0.0168922
12	50.6239	51.6086	49.6391	10.3289	10.5762	10.0816		34	0.01955	0.004709	0.0168976
14	52.7057	53.5749	51.8366	10.6526	10.847	10.4582		36	0.0172884	0.005247	0.0134342
16	54.806	55.7296	53.8825	10.8191	11.1142	10.524		38	0.019521	0.005933	0.0150838
18	56.0013	57.0196	54.9829	10.9464	11.2639	10.6289		40	0.0175924	0.006717	0.0120462
20	57.7979	58.8472	56.7486	10.9393	11.2373	10.6413		42	0.0201949	0.0071	0.0144746
22	58.3762	59.276	57.4764	10.8706	11.126	10.6152		44	0.0202441	0.008074	0.0138341
24	59.4917	60.3949	58.5886	11.0922	11.3465	10.8379		46	0.0179462	0.007562	0.0114314
26	59.7236	60.7129	58.7344	11.0105	11.3234	10.6977		48	0.0182252	0.006979	0.0123282
28	59.7462	60.5505	58.9419	10.9895	11.2973	10.6817		50	0.0177592	0.007652	0.0112433
30	60.5402	61.394	59.6863	10.893	11.1685	10.6174		52	0.0182713	0.008274	0.0109914
32	60.6532	61.3716	59.9348	11.0098	11.2767	10.743		54	0.0159164	0.00746	0.00906129
34	60.8572	61.6548	60.0595	10.7679	11.0413	10.4945		56	0.0167932	0.007373	0.0101653
36	60.4017	61.1872	59.6163	10.1276	10.4343	9.82087		58	0.0152658	0.00719	0.00893201
38	59.2591	60.3683	58.1499	10.1583	10.4445	9.87202		60	0.0166454	0.008142	0.00918393
40	58.0211	58.9043	57.1378	10.0153	10.3682	9.66242		62	0.0156346	0.007385	0.0087968
42	56.3538	57.2134	55.4942	9.49422	9.72021	9.26822		64	0.0157417	0.007493	0.00919414
44	53.355	54.3287	52.3813	8.92297	9.27679	8.56914		66	0.0142738	0.007225	0.00792456
46	49.8995	51.0112	48.7879	7.99175	8.37233	7.61116		68	0.0147295	0.006944	0.00837382
48	40.0591	41.227	38.8911	6.47337	6.87379	6.07295		70	0.0139898	0.006424	0.00816977
50	19.3874	20.5274	18.2475	6.25028	6.73303	5.76753		72	0.0152166	0.008447	0.00714479
52	14.4475	15.6875	13.2075	6.15837	6.65816	5.65857		74	0.0132591	0.006777	0.00689879
54	14.0423	15.3517	12.7329	6.15536	6.66538	5.64534		76	0.0126262	0.006874	0.00588208
56	14.4383	15.7516	13.1251	6.26807	6.64102	5.89512		78	0.011824	0.006547	0.00573553
58	14.9603	16.3789	13.5418	6.01502	6.45572	5.57432		80	0.0118217	0.006629	0.00546226
								82	0.0129854	0.007332	0.00627414
								84	0.0113165	0.006519	0.00521823
								86	0.0114	0.006775	0.00498454
								88	0.0111448	0.006567	0.00482188
								90	0.0099714	0.006129	0.00407812
								92	0.00974279	0.006212	0.00370922
								94	0.0102933	0.006328	0.00429087
								96	0.00811501	0.005266	0.00288433
								98	0.00758923	0.004982	0.00260299
								100	0.00793413	0.005493	0.00259267
								102	0.00694948	0.004329	0.00267234
								104	0.00732223	0.005182	0.00236853
								106	0.00732104	0.004867	0.00244192
								108	0.00750913	0.005199	0.0023444
								110	0.00782105	0.005555	0.00221731
								112	0.00664431	0.004995	0.00159087
								114	0.00661041	0.004694	0.0020053
								116	0.00702338	0.004698	0.0021584
								118	0.00606856	0.004146	0.00189236
								120	0.00599386	0.004667	0.00131646
								122	0.00604885	0.004908	0.00104158
								124	0.00702712	0.00502	0.00203277
								126	0.00598438	0.004496	0.00160341
								128	0.00603896	0.004565	0.00161345
								130	0.00605387	0.004588	0.0013706
								132	0.00469831	0.003313	0.0013195
								134	0.00456864	0.003347	0.00132761
								136	0.00425892	0.003129	0.0012384
								138	0.0048149	0.003177	0.00170962
								140	0.00440872	0.003426	0.00108585
								142	0.00411835	0.002979	0.00109058
								144	0.00468354	0.003709	0.000929551
								146	0.00424576	0.003347	0.000693151
								148	0.00366944	0.003184	0.000400201
								150	0.00314552	0.002253	0.000809209
								152	0.00349576	0.002818	0.000644777
								154	0.00419292	0.003203	0.00102109
								156	0.00384022	0.002982	0.000706334
								158	0.00343813	0.002833	0.000542315
								160	0.00379201	0.003145	0.000510501
								162	0.00407427	0.003371	0.000541765
								164	0.00272459	0.001997	0.000780525
								166	0.00306753	0.002696	0.000398301
								168	0.00222084	0.00164	0.000556371
								170	0.00344315	0.002914	0.000281563
								172	0.00264821	0.002243	0.000396025
								174	0.00242898	0.002059	0.00033301
								176	0.00247454	0.002191	0.000254507
								178	0.00275251	0.002202	0.000505694
								180	0.00223792	0.002007	0.000239688
								182	0.00367113	0.003171	0.000519273
								184	0.00271986	0.002391	0.000312674
								186	0.00180772	0.001563	0.000188426
								188	0.00271788	0.002262	0.000370658
								190	0.00246341	0.001897	0.000552142
								192	0.00208451	0.001899	0.000326966
								194	0.00242674	0.002007	0.000320821
								196	0.00207353	0.001782	0.000175062
								198	0.00182297	0.001423	0.00026866
								200	0.00168072	0.001455	0.000122029
								202	0.00205473	0.001628	0.000348043
								204	0.00161858	0.001275	0.000330893
								206	0.00151089	0.001151	0.000242579
								208	0.00172938	0.001482	0.000190504
								210	0.00155206	0.001282	0.000192852
								212	0.0021739	0.002048	0.000111555
								214	0.00177087	0.001587	0.000224266
								216	0.00196391	0.001936	2.84351e-05
								218	0.00183331	0.001808	8.52009e-05
								220	0.0015373	0.001427	2.86064e-05
								222	0.0012178	0.001114	4.37653e-05
								224	0.00160877	0.001304	0.000346183
								226	0.00184074	0.001666	9.20045e-05
								228	0.00116459	0.000996	6.06793e-05
								230	0.00113597	0.001004	0.000114207
								232	0.00124273	0.001109	7.17268e-05
								234	0.00170452	0.001557	0.00010499
								236	0.00118264	0.000967	0.000167448
								238	0.00157232	0.001369	0.000166227
								240	0.00113292	0.001009	7.04632e-05
								242	0.00137455	0.001326	0
								244	0.00118231	0.001028	0.000104628
								246	0.00112961	0.000806	0.000335491
								248	0.00127716	0.001076	0.000122319
								250	0.00116655	0.001157	0
								252	0.000861089	0.000622	0.000159673
								254	0.000805724	0.000788	4.43258e-05
								256	0.0011987	0.001053	0.000247643
								258	0.000983323	0.000697	0.000253894
								260	0.000690882	0.000643	0
								262	0.000880627	0.000711	0.000177683
								264	0.00070974	0.000803	0
								266	0.00120709	0.001107	6.00606e-05
								268	0.000731948	0.000633	3.08355e-05
								270	0.000553468	0.00059	3.0936e-05
								272	0.00110188	0.001001	6.41677e-05
								274	0.000673299	0.000558	9.63939e-05
								276	0.000755569	0.00072	0
								278	0.00092295	0.00085	0
								280	0.00102751	0.00089	4.62339e-05
								282	0.000653717	0.000633	0
								284	0.000393239	0.000364	0
								286	0.000683981	0.000611	0
								288	0.000873518	0.000698	0.000109132
								290	0.000614016	0.000629	0
								292	0.000398976	0.000373	0
								294	0.000565372	0.000544	0
								296	0.00095712	0.000914	0.000107177
								298	0.000711205	0.000559	0.000105192
								300	0.000475797	0.000423	0
								302	0.000475923	0.00046	6.37756e-05
								304	0.000841058	0.000764	6.39956e-05
								306	0.000535515	0.000552	0
								308	0.000467271	0.00048	0
								310	0.000672312	0.000651	0
								312	0.00039865	0.000297	0.000105837
								314	0.000536641	0.000461	4.87214e-05
								316	0.000751599	0.00065	0.000108526
								318	0.000710041	0.00066	0
								320	0.000724723	0.000755	0
								322	9.80076e-05	3.69e-05	6.60452e-05
								324	0.0002192	0.00021	0
								326	0.00049517	0.000446	0
								328	0.000747767	0.000655	5.02253e-05
								330	0.000708312	0.000634	5.01285e-05
								332	0.000899718	0.00086	0
								334	0.000775103	0.00071	0
								336	0.000708869	0.000693	0
								338	0.000401068	0.000362	0
								340	0.000443883	0.000411	0
								342	0.000654257	0.000629	5.3455e-05
								344	0.000487306	0.0005	0
								346	0.000997395	0.001006	0
								348	0.00067821	0.00066	0
								350	0.000576167	0.000513	0
								352	0.000293031	0.000323	0
								354	0.000281174	0.000276	0
								356	0.000211198	0.000201	0
								358	0.000241307	0.000229	0
								360	0.000560589	0.000494	0
								362	0.000448612	0.00051	0
								364	0.000494697	0.000434	0
								366	0.000471954	0.000427	0
								368	0.000246867	0.000214	0
								370	0.000413471	0.000321	7.6402e-05
								372	0.000526043	0.000556	0
								374	0.000426404	0.000376	0
								376	0.000161683	0.000141	0
								378	0.000395847	0.000397	0
								380	0.000245293	0.000216	0
								382	5.27896e-05	5.44e-05	0
								384	0.000221227	0.000213	0
								386	0.000303795	0.000153	0.00012378
								388	0.000150441	0.000135	0
								390	0.000203294	0.000189	0
								392	0.000140922	0.000142	0
								394	0.0004562	0.000474	0
								396	0.000339314	0.000328	0
								398	0.00013605	0.00013	0
								400	0.000676876	0.000605	0
								402	0.000239608	0.000228	0
								404	0.000406112	0.00035	0
								406	0.000214959	0.000204	0
								408	6.86246e-05	6.44e-05	0
								410	0.000503147	0.000497	0
								412	0.000285213	0.000368	0
								414	0.000269875	0.000245	0
								416	9.15236e-05	9.11e-05	0
								418	0.00017529	0.000114	4.07611e-05
								420	0.000475041	0.000433	0
								422	0.000290303	0.000329	0
								424	0.000338897	0.000312	0
								426	6.14221e-05	6.69e-05	0
								428	9.99652e-05	8.35e-05	0
								430	7.19739e-05	5.85e-05	0
								432	0.000147026	0.0002	0
								434	0.000337033	0.000387	0
								436	0.000325298	0.000292	0
								438	0.000139176	0.000139	0
								440	0.000168061	0.000151	0
								442	0.000302762	0.000351	0
								444	8.00566e-05	6.97e-05	0
								446	0.000354159	0.000324	0
								448	0.00011038	0.000103	0
								450	0.000258156	0.000296	0
								452	8.23427e-05	8.08e-05	0
								454	0.000529659	0.000473	0
								456	0.00032266	0.000277	0
								458	0.000354521	0.000313	0
								460	0.000253072	0.000233	0
								462	6.27971e-05	6.47e-05	0
								464	0.000553244	0.000605	0
								466	7.60602e-05	7.12e-05	0
								468	0.000168744	0.000148	0
								470	0.000316157	0.000323	0
								472	0.000297874	0.000268	0
								474	0.000225855	0.000212	0
								476	8.0062e-05	7.51e-05	0
								478	0.000149772	0.000141	0
								480	0	0	0
								482	6.99784e-05	7.62e-05	0
								484	0.00011396	9.52e-05	0
								486	8.85048e-05	7.7e-05	0
								488	0.000171089	0.000169	0
								490	4.14534e-05	3.89e-05	0
								492	0	0	0
								494	9.03203e-05	7.86e-05	0
								496	6.00183e-05	5.35e-05	0
								498	0.000167019	0.000146	0
								500	0.000255839	0.000227	0
								502	0	0	0
								504	0.000147272	0.000125	0
								506	4.32081e-05	4.06e-05	0
								508	0	0	0
								510	0.00021813	0.000208	0
								512	0.000214217	0.000206	0
								514	0.00017961	0.000245	0
								516	0.00019144	0.000167	0
								518	0	0	0
								520	8.73438e-05	8.17e-05	0
								522	0.000236727	0.000304	0
								524	7.36122e-05	7.58e-05	0
								526	0.00035886	0.000332	0
								528	0.000226992	0.000193	0
								530	8.98112e-05	8.4e-05	0
								532	6.61566e-05	5.9e-05	0
								534	0.000169076	0.000154	0
								536	0.000350945	0.000321	0
								538	0.000159192	0.000146	0
								540	0.000171102	0.000162	0
								542	0.000115847	0.000106	0
								544	4.80372e-05	4.51e-05	0
								546	0.000220766	0.000198	0
								548	0	0	0
								550	0	0	0
								552	7.98204e-05	8.22e-05	0
								554	9.90186e-05	8.05e-05	0
								556	0.000151791	0.000146	0
								558	0.000215329	0.000189	0
								560	0	0	0
								562	0.000252038	0.000227	0
								564	0.000156634	0.000235	0
								566	0.000234651	0.000211	0
								568	0	0	0
								570	8.95902e-05	9.76e-05	0
								572	0	0	0
								574	0	0	0
								576	0	0	0
								578	0	0	0
								580	0.000115871	0.000101	0
								582	0.000220052	0.0003	0
								584	0.000132066	0.00012	0
								586	0.000228742	0.000279	0
								588	8.95283e-05	9.22e-05	0
								590	0.000134761	7.06e-05	6.46077e-05
								592	0.000313192	0.000356	0
								594	0	0	0
								596	0	0	0
								598	0.000123164	0.000107	0
								600	5.75093e-05	5.4e-05	0
								602	0.000115873	9.42e-05	0
								604	0	0	0
								606	0	0	0
								608	0	0	0
								610	0.000225275	0.000211	0
								612	0.0003195	0.000298	0
								614	0	0	0
								616	8.68922e-05	7.75e-05	0
								618	0.000132424	0.000115	0
								620	0.000194439	0.000175	0
								622	0	0	0
								624	0	0	0
								626	0	0	0
								628	0	0	0
								630	0.000202435	0.000202	0
								632	0	0	0
								634	0.000142288	0.00014	0
								636	0	0	0
								638	9.4663e-05	8.44e-05	0
								640	0	0	0
								642	0.000188364	0.000157	0
								644	0.000117214	0.000128	0
								646	0	0	0
								648	0	0	0
								650	0	0	0
								652	0.000322007	0.000311	0
								654	0.000154661	0.000152	0
								656	0.000139444	0.00013	0
								658	0	0	0
								660	0	0	0
								662	0	0	0
								664	0	0	0
								666	0.000235467	0.000212	0
								668	0.000163078	0.000142	0
								670	0	0	0
								672	0.000125002	0.000129	0
								674	0	0	0
								676	0	0	0
								678	0.00017268	0.000169	0
								680	0.000155849	0.000146	0
								682	0	0	0
								684	0	0	0
								686	0	0	0
								688	0	0	0
								690	0.000264597	0.000238	0
								692	0	0	0
								694	0.000506823	0.000599	0
								696	0	0	0
								698	0	0	0
								700	8.87644e-05	8.33e-05	0
								702	0	0	0
								704	0	0	0
								706	0	0	0
								708	0	0	0
								710	0	0	0
								712	0	0	0
								714	0	0	0
								716	0	0	0
								718	0	0	0
								720	0.000141995	0.000127	0
								722	0	0	0
								724	0	0	0
								726	0	0	0
								728	0	0	0
								730	0	0	0
								732	0	0	0
								734	0.00039008	0.000343	0
								736	0	0	0
								738	0	0	0
								740	0	0	0
								742	0	0	0
								744	0	0	0
								746	0	0	0
								748	0	0	0
								750	0	0	0
								752	0	0	0
								754	0	0	0
								756	0	0	0
								758	0	0	0
								760	0	0	0
								762	0	0	0
								764	0	0	0
								766	0	0	0
								768	0	0	0
								770	0	0	0
								772	0.000629016	0.000547	0
								774	0	0	0
								776	0	0	0
								778	0.000299935	0.000281	0
								780	0.000835615	0.00078	0
								782	0	0	0
								784	0.000355721	0.000349	0
								786	0	0	0
								788	0.000170132	0.00016	0
								790	0	0	0
								792	0	0	0
								794	0	0	0
								796	0	0	0
								798	0	0	0
								800	0.000389002	0.000316	0
								802	0	0	0
								804	0	0	0
								806	0.000658101	0.000592	0
								808	0	0	0
								810	0	0	0
								812	0.000226842	0.000213	0
								814	0	0	0
								816	0	0	0
								818	0	0	0
								820	0	0	0
								822	0	0	0
								824	0	0	0
								826	0	0	0
								828	0	0	0
								830	0	0	0
								832	0	0	0
								834	0	0	0
								836	0	0	0
								838	0	0	0
								840	0	0	0
								842	0	0	0
								844	0	0	0
								846	0	0	0
								848	0	0	0
								850	0	0	0
								852	0	0	0
								854	0	0	0
								856	0	0	0
								858	0	0	0
								860	0	0	0
								862	0	0	0
								864	0	0	0
								866	0	0	0
								868	0	0	0
								870	0	0	0
								872	0	0	0
								874	0	0	0
								876	0	0	0
								878	0	0	0
								880	0	0	0
								882	0	0	0
