# Supplementary material for: CCDC32 stabilizes clathrin-coated pits and drives their invagination
Source: eLife. 2026 Jan 5;14:RP107039. doi: 10.7554/eLife.107039 (PMC12768407; doi:10.7554/eLife.107039)
Supplement: Figure 2—figure supplement 1—source data 1. [file elife-107039-fig2-figsupp1-data1.xlsx]

## Sheet: Tabelle1
	Figure 2-figure supplement 1-Source Data 1-Numeric data to generate Figure 2-figure supplement 1
	Figure 2-figure supplement 1B
		siControl			siCCDC32
	AP2-α	1	1	1	1.16705	0.794769	0.992512
	AP2-β	1	1	1	0.919667	0.755404	1.04514
	AP2-μ	1	1	1	1.15605	0.902029	1.18128
	AP2-σ	1	1	1	1.28895	0.891354	1.02419
