# Supplementary material for: CCDC32 stabilizes clathrin-coated pits and drives their invagination
Source: eLife. 2026 Jan 5;14:RP107039. doi: 10.7554/eLife.107039 (PMC12768407; doi:10.7554/eLife.107039)
Supplement: Figure 2—figure supplement 2—source data 1. [file elife-107039-fig2-figsupp2-data1.xlsx]

## Sheet: Tabelle1
	Figure 2-figure supplement 2-Source Data 1-Numeric data to generate Figure 2-figure supplement 2
	Figure 2-figure supplement 2
	<20	20-60	60-100	100-150	>150
	0.383967	0.35884	0.132776	0.0595752	0.0648419
	0.382034	0.327933	0.144347	0.0771599	0.0685266
	0.382079	0.310604	0.137297	0.0749864	0.0950335
	0.310431	0.337794	0.158531	0.0900197	0.103224
	0.3857	0.344934	0.140393	0.0629723	0.0660015
	0.408021	0.316248	0.131437	0.0731224	0.0711714
	0.459004	0.289512	0.108904	0.063837	0.0787434
	0.315402	0.350551	0.156454	0.0844215	0.0931712
	0.38441	0.334492	0.131751	0.0789799	0.070367
	0.338456	0.342872	0.153436	0.0862364	0.0789997
	0.401476	0.289822	0.145053	0.083604	0.0800449
