# Supplementary material for: CCDC32 stabilizes clathrin-coated pits and drives their invagination
Source: eLife. 2026 Jan 5;14:RP107039. doi: 10.7554/eLife.107039 (PMC12768407; doi:10.7554/eLife.107039)
Supplement: Figure 2—source data 1. [file elife-107039-fig2-data1.xlsx]

## Sheet: Tabelle1
Figure 2-Source Data 1-Numeric data to generate Figure 2
Figure 2B			Figure 2C										Figure 2F			Figure 2G			Figure 2H
siControl	siCCDC32			siControl				siCCDC32					siControl	siCCDC32		siControl	siCCDC32		siControl	siCCDC32
1	0.26723			2.5	5	10	20	2.5	5	10	20		0.711805	0.872949		0.100251	0.106061		28.2901	25.8855
1	0.587753		Mean	47.7451	104.992	176.509	255.021	35.6746	79.3359	138.479	187.947		0.628334	0.961399		0.0908695	0.0821977		30.239	20.8076
1	0.298297		std	2.37476	7.81938	10.7516	12.9707	5.31292	7.2831	11.1466	10.0233		0.680459	0.85946		0.124348	0.0473339		38.4216	14.2544
1	0.337618												0.822342	0.72158		0.133204	0.0501436		34.8592	18.381
1	0.486525												0.714063	1.12358		0.104735	0.0490941		34.6664	11.228
1	0.311034												0.71873	0.855877		0.129676	0.0545147		38.1115	16.6648
1	0.655566												0.70597	0.880053		0.111096	0.0524892		34.3535	15.0938
1	0.385773												0.622502	0.869392		0.114046	0.0586901		39.825	16.9857
													0.614271	0.976189		0.116136	0.0630336		40.2693	16.709
													0.666349	0.935288		0.130525	0.0656108		41.0867	17.6802
													0.678551	1.00791		0.0974245	0.0639361		31.7022	16.5209
