# Supplementary material for: CCDC32 stabilizes clathrin-coated pits and drives their invagination
Source: eLife. 2026 Jan 5;14:RP107039. doi: 10.7554/eLife.107039 (PMC12768407; doi:10.7554/eLife.107039)
Supplement: Figure 3—source data 1. [file elife-107039-fig3-data1.xlsx]

## Sheet: Tabelle1
Figure 3-Source Data 1: Numerical data used to generate Figure 3.
Figure 3C	Intensity traces														deltaZ/h
	siControl							siCCDC32
	Epi			TIRF				Epi			TIRF				time (s)	siControl	siCCDC32
time(s)	Mean	Upper Limit	Lower Limit	Mean	Upper Limit	Lower Limit	time(s)	Mean	Upper Limit	Lower Limit	Mean	Upper Limit	Lower Limit		1.5	0.0197628	-0.00585764
-7.5	14.4565	0.756375	0.756375	10.9697	0.313669	0.313669	-7.5	23.9974	1.07577	1.07577	19.064	1.04346	1.04346		3	-0.0141744	0.00519452
-6	14.3309	0.77712	0.77712	11.1959	0.210933	0.210933	-6	24.8098	1.16525	1.16525	19.2817	1.00825	1.00825		4.5	0.0212877	0.0132534
-4.5	15.2625	0.798004	0.798004	11.9121	0.226999	0.226999	-4.5	25.8556	1.0663	1.0663	18.804	0.892242	0.892242		6	-0.00730456	0.00395523
-3	17.818	0.77104	0.77104	13.3551	0.252312	0.252312	-3	28.086	1.2218	1.2218	19.606	0.710864	0.710864		7.5	-0.0175988	0.00705785
-1.5	21.5484	0.917785	0.917785	16.9683	0.239195	0.239195	-1.5	31.4615	1.56542	1.56542	22.9662	0.65651	0.65651		9	-0.017859	0.0085041
0	23.355	1.12459	1.12459	25.7098	0.394683	0.394683	0	31.4596	1.68898	1.68898	32.7077	0.713543	0.713543		10.5	-0.0259494	0.0100531
1.5	26.9921	1.25155	1.25155	29.3428	0.552821	0.552821	1.5	33.8499	2.03257	2.03257	35.6243	0.580826	0.580826		12	-0.0280791	0.0287411
3	30.2592	1.3586	1.3586	32.5963	0.45638	0.45638	3	36.9468	2.29066	2.29066	36.6185	0.413826	0.413826		13.5	-0.017424	0.0465312
4.5	33.0195	1.49913	1.49913	35.8761	0.503103	0.503103	4.5	38.5033	2.52331	2.52331	38.8366	0.391388	0.391388		15	-0.00924036	0.0642593
6	35.918	1.64336	1.64336	38.8796	0.598775	0.598775	6	40.3783	2.67976	2.67976	40.6455	0.346533	0.346533		16.5	-0.012105	0.0898256
7.5	38.3874	1.72667	1.72667	41.4731	0.750081	0.750081	7.5	41.9938	2.98508	2.98508	41.8686	0.444606	0.444606		18	-0.00545382	0.10933
9	40.5418	1.83472	1.83472	43.717	0.774483	0.774483	9	43.5814	3.09164	3.09164	43.4101	0.505975	0.505975		19.5	0.00346775	0.130633
10.5	42.8217	1.92021	1.92021	45.3049	0.8827	0.8827	10.5	44.6877	3.20135	3.20135	44.3416	0.526366	0.526366		21	0.0144129	0.158582
12	44.795	2.06656	2.06656	46.5445	0.922487	0.922487	12	46.1325	3.41868	3.41868	44.9557	0.463815	0.463815		22.5	0.017235	0.193631
13.5	46.6331	2.12378	2.12378	47.592	0.906356	0.906356	13.5	47.5178	3.62387	3.62387	45.6201	0.530268	0.530268		24	0.0166798	0.214814
15	48.6193	2.26719	2.26719	48.3554	1.06798	1.06798	15	48.1236	3.781	3.781	46.2031	0.501377	0.501377		25.5	0.0353157	0.239588
16.5	50.2446	2.44941	2.44941	48.9981	1.11438	1.11438	16.5	49.0588	3.90282	3.90282	46.5901	0.521643	0.521643		27	0.048596	0.260798
18	51.6641	2.591	2.591	49.3133	1.18908	1.18908	18	49.7721	4.13924	4.13924	46.7005	0.522848	0.522848		28.5	0.00198195	0.222186
19.5	52.9448	2.64395	2.64395	49.1368	1.23898	1.23898	19.5	50.2724	4.19075	4.19075	46.5557	0.534042	0.534042		30	0.00786577	0.136478
21	54.2714	2.72889	2.72889	48.6274	1.27802	1.27802	21	50.7286	4.35677	4.35677	46.7551	0.501005	0.501005
22.5	54.8127	2.75304	2.75304	48.0807	1.31757	1.31757	22.5	50.0989	4.40083	4.40083	46.3245	0.526563	0.526563
24	54.5224	2.63174	2.63174	46.657	1.37456	1.37456	24	49.5028	4.32745	4.32745	45.0449	0.577551	0.577551
25.5	52.6826	2.52419	2.52419	44.1438	1.30127	1.30127	25.5	48.0978	4.18483	4.18483	43.4639	0.505918	0.505918
27	46.6943	2.05957	2.05957	40.6924	1.11363	1.11363	27	43.0742	3.76434	3.76434	41.8412	0.463432	0.463432
28.5	33.4859	1.19609	1.19609	31.8636	0.562429	0.562429	28.5	35.1338	2.70264	2.70264	35.7869	0.394666	0.394666
30	20.3961	0.766636	0.766636	13.882	0.304057	0.304057	30	29.7718	1.7426	1.7426	22.0779	0.676318	0.676318
31.5	14.3091	0.662496	0.662496	7.73988	0.31363	0.31363	31.5	25.2177	1.1457	1.1457	17.0442	1.01073	1.01073
33	11.5222	0.727703	0.727703	6.14129	0.319245	0.319245	33	23.9396	0.955371	0.955371	15.7747	1.14951	1.14951
34.5	10.1831	0.672208	0.672208	5.80722	0.296221	0.296221	34.5	22.6865	0.844303	0.844303	16.3534	1.27759	1.27759
36	9.77545	0.688586	0.688586	6.00546	0.300714	0.300714	36	21.9849	0.860398	0.860398	16.0597	1.26884	1.26884
