# Supplementary material for: CCDC32 stabilizes clathrin-coated pits and drives their invagination
Source: eLife. 2026 Jan 5;14:RP107039. doi: 10.7554/eLife.107039 (PMC12768407; doi:10.7554/eLife.107039)
Supplement: Figure 4—figure supplement 1—source data 1. [file elife-107039-fig4-figsupp1-data1.xlsx]

## Sheet: Tabelle1
	Figure 4-Source Data 1-Numerical data to generate Figure 4-figure supplement 1
	Figure 4-figure supplement 1C											Figure4-figure supplement 1D
	Flat CCS%			Dome CCS%			Sphere CCS%					Flat CCS/PM %			Dome CCS/PM %			Sphere CCS/PM %
	siControl	siCCDC32		siControl	siCCDC32		siControl	siCCDC32				siControl	siCCDC32		siControl	siCCDC32		siControl	siCCDC32
	15.3846	68		38.4615	10.6667		46.1538	21.3333				0.490075	2.78378		1.09514	0.367466		0.675175	0.531452
	23.2558	31.8182		18.6047	34.0909		58.1395	34.0909				0.261044	1.35474		0.414491	1.46929		0.928471	0.96181
	21.6667	65.3846		38.3333	15.3846		40	19.2308				0.293259	1.21072		1.00077	0.249148		0.950327	0.176504
	27.2727	60.4651		27.2727	23.2558		45.4545	16.2791				1.01777	2.38424		1.26212	0.677905		1.34203	0.349571
	26.5625	47.3684		34.375	36.8421		39.0625	15.7895				0.511185	1.55022		0.483717	1.13342		0.786211	0.335859
	22.4719	68.2927		43.8202	13.4146		23.5955	18.2927				1.00815	3.95549		2.68562	0.960201		1.26381	0.886912
	29.8246	44.186		41.2281	27.1318		28.9474	28.6822				0.862091	2.57832		1.81114	1.80267		0.729477	1.31984
	33.8028	63.4146		32.3944	20.7317		33.8028	15.8537				0.653667	1.99592		0.832846	0.763859		0.670833	0.360398
	23.913	57.5		41.3043	21.6667		34.7826	20.8333				0.412895	2.05753		1.27714	0.773851		0.84635	0.558013
	34.5455	39.6552		40	29.3103		25.4545	31.0345				0.753778	1.24559		1.29754	0.94463		0.594072	0.666658
	15.3846	52.6316		27.8846	22.2222		56.7308	25.1462				0.336686	3.17759		1.03647	1.06828		1.54578	0.734033
	22.4806	81.0811		25.5814	13.5135		51.938	5.40541				0.457618	5.7184		0.768816	0.963968		1.0565	0.286043
	24.0506	58.6538		27.8481	26.9231		48.1013	14.4231				0.514272	3.98264		0.819344	1.54519		1.07362	0.560574
	16.6667	57.1429		31.9444	23.2143		51.3889	19.6429				0.524981	3.5028		0.634287	1.36502		0.943249	0.706111
	7.77778	55.3846		31.1111	20		61.1111	24.6154				1.05571	5.88295		0.856595	1.84848		0.178747	1.85551
	14.8148	75.3247		33.3333	14.2857		51.8519	10.3896				0.292698	7.61499		0.68784	1.32608		1.02854	0.716873
	5.26316	66.6667		26.3158	19.2982		68.4211	14.0351				0.0923098	10.1227		1.07125	1.30465		1.14147	0.640405
	24.1935	61.8182		41.9355	34.5455		33.871	3.63636				0.817334	4.04379		1.55764	2.14937		1.00811	0.136198
	13.7931	39.5349		48.2759	51.1628		37.931	9.30233				0.210462	1.13604		1.2934	1.37153		0.587824	0.260179
	24.1379	79.2208		62.069	12.987		13.7931	7.79221				0.393517	3.58341		1.20382	0.393592		0.165622	0.202814
	70	55.814		20	20.9302		10	23.2558				2.56567	2.60783		0.878981	0.896179		0.352934	0.796572
	10	47.7273		70	38.6364		20	13.6364				0.0652392	4.12946		0.667875	3.41248		0.143051	0.664776
	22.2222	84.127		44.4444	9.52381		33.3333	6.34921				0.341514	4.1747		0.843364	0.470292		0.467549	0.221056
	41.5385	80		26.1538	8.57143		32.3077	11.4286				2.00987	3.31677		1.09515	0.313001		0.978046	0.324377
	33.3333	79.0698		33.3333	13.9535		33.3333	6.97674				0.440603	5.86342		0.425149	0.54824		0.362215	0.280677
	17.3913	63.2653		54.3478	28.5714		28.2609	8.16327				0.463883	4.02916		1.7671	2.45158		0.633451	0.29861
	10.5263	61.7647		57.8947	17.6471		31.5789	20.5882				0.175782	4.36295		1.47581	0.82958		0.738316	0.708977
	27.2727	82.0513		36.3636	7.69231		36.3636	10.2564				0.293036	3.99314		0.706734	0.581704		0.577698	0.3337
	16	66.6667		52	25		32	8.33333				0.349353	2.62416		1.21317	0.93394		0.54693	0.179541
	18.1818	66.6667		54.5455	21.2121		27.2727	12.1212				0.35461	3.3051		0.94613	1.24046		0.32757	0.553746
	17.6471	61.3861		70.5882	28.7129		11.7647	9.90099				0.140278	3.13574		1.3329	1.86283		0.123817	0.304433
	24.7619	58.8235		29.5238	32.3529		45.7143	8.82353				0.483834	3.60902		1.43624	1.51406		0.84477	0.284404
	33.3333	70.3704		33.3333	11.1111		33.3333	18.5185				1.63991	3.00484		3.36183	0.403355		1.07291	0.0160481
	18.5185	35.9551		37.037	41.573		44.4444	22.4719				0.475541	1.59654		1.79881	1.25869		1.07965	0.47001
	25.3731	38.0952		26.8657	21.9048		47.7612	40				0.529731	3.78736		0.890951	1.77625		1.14536	1.62402
	26.9231			32.6923			40.3846					0.457337			0.453713			0.34096
	18.2927			43.9024			37.8049					0.658869			1.27056			0.770614
	10.3448			46.5517			43.1034					0.732894			2.31237			1.6558
