# Supplementary material for: CCDC32 stabilizes clathrin-coated pits and drives their invagination
Source: eLife. 2026 Jan 5;14:RP107039. doi: 10.7554/eLife.107039 (PMC12768407; doi:10.7554/eLife.107039)
Supplement: Figure 4—source data 1. [file elife-107039-fig4-data1.xlsx]

## Sheet: Tabelle1
Figure 4-Source Data 1-Numerical data to generate Figure 4
Figure 4C				Figure 4D									Figure 4E
%	siControl	siCCDC32		Flat CCS area			Dome CCS area			Sphere CCS area			siControl	siCCDC32
flat	24.1648	59.3656		siControl	siCCDC32		siControl	siCCDC32		siControl	siCCDC32		2.26039	3.6827
dome	35.4233	23.1033		9155.56	19151.6		29025	18606.2		8663.89	11168.8		1.60401	3.78585
sphere	40.4119	17.5311		21552.8	31528.1		25020.3	21253.1		18772.2	15817.2		2.24435	1.63638
				4915.62	9623.44		36912.5	18184.4		17138.9	9957.81		3.62192	3.41172
Number	siControl	siCCDC32		4720.31	11653.1		26832.8	22382.8		9300	9364.06		1.78111	3.0195
flat	528	1385		10071.9	15865.6		22434.4	22653.1		6880.56	11856.2		4.95758	5.8026
dome	774	539		6650	11734.4		15448.4	15328.1		13716.7	13506.2		3.40271	5.70083
sphere	883	409		6962.5	25629.7		23953.1	21998.4		7081.25	10859.4		2.15735	3.12017
Total	2185	2333		6818.75	8012.5		39948.4	21423.4		16640.6	9729.69		2.53639	3.3894
				11637.5	12154.7		22604.7	20785.9		8957.81	10417.2		2.64539	2.85688
				5173.44	32196.9		24706.2	14232.8		7303.12	24948.4		2.91894	4.97991
				13965.6	11056.2		27532.8	15821.9		5865.62	11689.1		2.28293	6.96841
				8971.88	35398.4		19448.4	17567.2		6667.19	13821.9		2.40723	6.08841
				11707.8	31315.6		13090.6	21093.8		11128.1	11981.2		2.10252	5.57394
				8865.62	10278.1		17303.1	19170.3		14451.6	11176.6		2.09105	9.58693
				8039.06	9100		20364.1	15084.4		5518.75	7639.06		2.00908	9.65795
				5375	18850		13979.7	19995.3		17521.9	11260.9		2.30503	12.0677
				8735.94	24681.2		22959.4	14868.8		12773.4	10218.8		3.38308	6.32936
				8065.62	16785.9		25289.1	18648.4		6460.94	13185.9		2.09168	2.76775
				7881.25	31995.3		40418.8	21653.1		12118.8	11573.4		1.76296	4.17982
				7734.38	10315.6		19345.3	19156.2		15468.8	11596.9		3.79759	4.30058
				5321.88	7743.75		26037.5	17260.9		10810.9	14837.5		0.876166	8.20672
				7604.69	18468.8		26343.8	18501.6		6856.25	14029.7		1.65243	4.86605
				7546.88	10082.8		25106.2	17903.1		14226.6	12403.1		4.08307	3.95415
				9148.44	17912.5		21985.9	22092.2		15990.6	22512.5		1.22797	6.69234
				7900	15735.9		19323.4	21604.7		14103.1	20678.1		2.86444	6.77935
				13217.2	10821.9		25453.1	20907.8		12246.9	8600		2.38991	5.90151
				12653.1	12506.2		38543.8	11226.6		8564.06	9684.38		1.57747	4.90854
				12267.2	48700		22579.7	16384.4		14668.8	10014.1		2.10945	3.73764
				10042.2	28017.2		25171.9	26385.9		14540.6	15412.5		1.62831	5.09931
				6576.56	12406.2		27878.1	18789.1		13735.9	16103.1		1.59699	5.303
				11946.9	17307.8		21654.7	24845.3		10439.1	21570.3		2.76484	5.40748
				15825	11134.4		27767.2	13312.5		14470.3	15062.5		6.07465	3.42424
				25987.5	9725		22217.2	26551.6		14882.8	11896.9		3.35401	3.32523
				6259.38	9839.06		23848.4	14590.6		8460.94	7650		2.56604	7.18763
				14700	24501.6		45204.7	21218.8		23276.6	10157.8		1.25201
				11715.6	22104.7		21760.9	21060.9		18940.6	11264.1		2.70005
				20793.8	8390.62		16567.2	15443.8		10928.1	8529.69		4.70106
				19503.1	10725		24614.1	21300		17907.8	15384.4
				16715.6	10792.2		12445.3	19595.3		7659.38	12832.8
				45720.3	8975		20248.4	25659.4		16132.8	17737.5
				12043.8	27484.4		29754.7	16279.7		11423.4	17651.6
				22440.6	14431.2		14184.4	18915.6		16931.2	17525
				19762.5	16650		10503.1	13371.9		21481.2	17912.5
				36659.4	10234.4		20078.1	19785.9		10146.9	11050
				9126.56	16878.1		18881.2	17104.7		13525	13539.1
				7278.12	40559.4		14956.2	12896.9		14514.1	13726.6
				10992.2	9615.62		28539.1	18620.3		21462.5	8629.69
				5656.25	32335.9		25442.2	12906.2		11898.4	9698.44
				10031.2	51020.3		17946.9	15068.8		11825	20176.6
				20087.5	53367.2		18778.1	26581.2		11114.1	10923.4
				6034.38	31973.4		19046.9	21623.4		16978.1	11104.7
				11962.5	24668.8		19685.9	18878.1		12370.3	7109.38
				16329.7	18903.1		16707.8	18562.5		11267.2	15218.8
				18179.7	23139.1		15159.4	51068.8		9518.75	21589.1
				13339.1	11734.4		11589.1	19443.8		9665.62	11895.3
				7893.75	12215.6		16542.2	19334.4		11745.3	14028.1
				11220.3	22020.3		25018.8	15129.7		9635.94	12840.6
				9217.19	11395.3		13165.6	9450		8779.69	12781.2
				10918.8	15437.5		19796.9	18301.6		14534.4	11940.6
				13689.1	22171.9		21846.9	16337.5		8729.69	19476.6
				16079.7	8771.88		21415.6	16285.9		14825	15518.8
				7312.5	27421.9		55010.9	23803.1		15170.3	13301.6
				15568.8	60618.8		21809.4	19035.9		13018.8	12648.4
				21232.8	18367.2		23621.9	29231.2		11725	10673.4
				10178.1	14610.9		20462.5	18689.1		15900	12937.5
				11045.3	32393.8		38364.1	13487.5		11662.5	7915.62
				9400	25959.4		18043.8	15578.1		9978.12	6229.69
				11868.8	23914.1		20212.5	18420.3		15135.9	19667.2
				18053.1	6654.69		24739.1	18575		16907.8	17271.9
				12548.4	12295.3		31598.4	18832.8		11381.2	13753.1
				12420.3	58328.1		27479.7	11842.2		11135.9	14665.6
				8350	34800		44017.2	11307.8		15171.9	10360.9
				10062.5	9418.75		15607.8	31225		11673.4	13573.4
				11520.3	14848.4		23407.8	11939.1		16876.6	22570.3
				9240.62	13217.2		20693.8	16307.8		17659.4	11743.8
				16542.2	12717.2		18845.3	26731.2		14117.2	16956.2
				12803.1	50046.9		15934.4	15153.1		9345.31	13442.2
				14865.6	17873.4		22078.1	10457.8		12546.9	15784.4
				12890.6	9843.75		21100	22265.6		12507.8	11926.6
				10215.6	27675		21042.2	18315.6		13275	18004.7
				8345.31	12915.6		8363.89	15854.7		17190.6	10593.8
				13545.3	14696.9		32502.8	15431.2		18356.2	13334.4
				11070.3	20828.1		36022.2	29159.4		15692.2	12825
				19134.4	18312.5		20219.4	15976.6		12153.1	9571.88
				9406.25	21129.7		23686.1	21698.4		8435.94	10537.5
				12537.5	8454.69		20853.1	25015.6		7128.12	14475
				14396.9	18339.1		9126.56	25839.1		12289.1	10973.4
				7965.62	16714.1		7898.44	16607.8		12500	9181.25
				12103.1	35440.6		17482.8	17198.4		10842.2	11184.4
				10523.4	24718.8		19129.7	27556.2		25112.5	9546.88
				7292.19	22621.9		16940.6	18843.8		10331.2	9706.25
				20171.9	41201.6		20709.4	24462.5		9798.44	10957.8
				5662.5	18225		14706.2	30275		11307.8	13071.9
				5596.88	11670.3		9292.19	23290.6		8795.31	9546.88
				12376.6	24142.2		25084.4	19584.4		16409.4	17492.2
				23481.2	13504.7		13170.3	23206.2		7625	13437.5
				11864.1	31339.1		28023.4	13010.9		8462.5	12584.4
				7885.94	14325		10773.4	16912.5		7743.75	11951.6
				12487.5	48496.9		16454.7	14460.9		23445.3	16006.2
				9532.81	48029.7		23642.2	28885.9		7740.62	10432.8
				13798.4	33573.4		20832.8	19185.9		18685.9	9343.75
				12817.2	12950		10614.1	13093.8		14318.8	11531.2
				11728.1	18846.9		12389.1	14321.9		13315.6	11751.6
				19107.8	25625		15967.2	16534.4		12957.8	9442.19
				11825	50334.4		12520.3	18701.6		13664.1	11723.4
				29685.9	12157.8		8393.75	13200		13195.3	8432.81
				18254.7	22806.2		17375	20190.6		14267.2	12684.4
				6229.69	11003.1		19209.4	24121.9		13615.6	13671.9
				14645.3	12329.7		21020.3	18218.8		10567.2	9784.38
				10256.2	23554.7		6360.94	22743.8		12379.7	10764.1
				16354.7	24382.8		9943.75	13354.7		15775	8975
				11465.6	33050		20498.4	13703.1		7582.81	10170.3
				16892.2	21943.8		12300	36296.9		14421.9	11876.6
				29100	15317.2		8278.12	18848.4		11382.8	11667.2
				10645.3	14570.3		22217.2	17090.6		16754.7	15717.2
				13318.8	28045.3		10295.3	23053.1		18501.6	8551.56
				21421.9	27393.8		23198.4	15850		11431.2	11695.3
				17715.6	36950		12875	12295.3		13682.8	12470.3
				8495.31	9212.5		14781.2	15907.8		20640.6	8710.94
				7531.25	49979.7		24507.8	10532.8		15545.3	14810.9
				8953.12	17951.6		17725	14334.4		14253.1	11437.5
				7418.75	38453.1		21146.9	15314.1		10173.4	17118.8
				8160.94	13809.4		28495.3	15829.7		16992.2	10921.9
				13235.9	51654.7		17348.4	27309.4		14332.8	9584.38
				16339.1	24853.1		19496.9	9329.69		15285.9	11323.4
				9432.81	36428.1		20621.9	35615.6		11826.6	15904.7
				12304.7	42829.7		14464.1	23751.6		21685.9	20331.2
				8932.81	7187.5		12432.8	29226.6		13501.6	8350
				7523.44	13667.2		21843.8	20940.6		17889.1	10398.4
				10648.4	7448.44		18420.3	25426.6		12670.3	17767.2
				13839.1	11904.7		23531.2	17350		15062.5	10823.4
				6479.69	10821.9		21770.3	24106.2		9820.31	12315.6
				21617.2	101795		22976.6	16664.1		11559.4	14142.2
				10707.8	9287.5		29451.6	10265.6		14100	21257.8
				10114.1	12035.9		24795.3	52668.8		12825	18743.8
				16854.7	49648.4		24737.5	17540.6		16853.1	14326.6
				17542.2	29620.3		20942.2	15287.5		11865.6	9267.19
				9615.62	14615.6		10529.7	18078.1		10100	11662.5
				25109.4	37340.6		12009.4	14529.7		11078.1	12535.9
				14506.2	11835.9		17028.1	15362.5		11600	7528.12
				22496.9	24059.4		12435.9	18735.9		15015.6	11248.4
				9726.56	26204.7		10529.7	15043.8		11434.4	11353.1
				5565.62	25103.1		21081.2	16703.1		16453.1	10740.6
				6967.19	24404.7		13410.9	20907.8		15462.5	15750
				11742.2	12570.3		19360.9	15043.8		10512.5	16707.8
				7160.94	9192.19		15923.4	15090.6		12693.8	14320.3
				13835.9	15832.8		16535.9	12846.9		9857.81	12832.8
				14267.2	30059.4		15756.2	20542.2		10545.3	26287.5
				14320.3	13939.1		18451.6	14085.9		14735.9	9468.75
				8354.69	20364.1		10470.3	17726.6		11215.6	9073.44
				11953.1	19318.8		25181.2	18975		16428.1	16975
				7000	22971.9		19934.4	22889.1		15659.4	11535.9
				12570.3	10585.9		12315.6	16239.1		10014.1	10912.5
				5695.31	25600		21407.8	14290.6		12990.6	12732.8
				24954.7	10415.6		11959.4	16106.2		9382.81	9168.75
				11656.2	32929.7		30139.1	11215.6		15396.9	10832.8
				9189.06	39900		16121.9	13120.3		9115.62	10654.7
				9481.25	26418.8		15253.1	10873.4		10117.2	11040.6
				13356.2	15840.6		9514.06	14400		10340.6	16523.4
				8053.12	13395.3		26521.9	11800		12781.2	18665.6
				23712.5	13475		14818.8	14265.6		16539.1	8600
				15067.2	13400		15293.8	19351.6		12839.1	7937.5
				17304.7	15862.5		11053.1	18090.6		11970.3	6182.81
				20550	14782.8		16300	13040.6		11001.6	10881.2
				29181.2	14832.8		19829.7	11725		12098.4	9000
				20196.9	11679.7		17215.6	12023.4		8600	7967.19
				14690.6	17390.6		11292.2	14148.4		10707.8	12318.8
				24918.8	11890.6		14285.9	13560.9		6581.25	11600
				26534.4	10079.7		14273.4	13804.7		12537.5	14895.3
				7229.69	19351.6		20881.2	22635.9		10864.1	26135.9
				19928.1	22387.5		29856.2	29509.4		8632.81	6809.38
				27615.6	19692.2		14098.4	31651.6		15089.1	16460.9
				25643.8	13237.5		17317.2	26492.2		12979.7	11859.4
				7901.56	13826.6		21296.9	30845.3		9617.19	11109.4
				10493.8	42157.8		8103.12	25306.2		17762.5	11693.8
				11389.1	10392.2		9979.69	25156.2		12426.6	13835.9
				16389.1	14890.6		14735.9	24301.6		15617.2	14420.3
				17896.9	9607.81		20731.2	20537.5		11209.4	11571.9
				11870.3	12212.5		14320.3	10560.9		13240.6	14682.8
				15926.6	16403.1		16068.8	16190.6		14012.5	11654.7
				14206.2	11450		12212.5	15315.6		15353.1	6950
				12168.8	7537.5		12395.3	13859.4		15935.9	11243.8
				9442.19	11426.6		10607.8	17735.9		10695.3	13885.9
				9582.81	15643.8		16887.5	18940.6		14664.1	10590.6
				12050	15360.9		10012.5	15325		11542.2	12404.7
				14640.6	29790.6		38875	13385.9		15067.2	1125
				18629.7	10178.1		15343.8	21520.3		13862.5	10270.3
				17789.1	11045.3		15081.2	16334.4		9670.31	8496.88
				19978.1	11978.1		14331.2	13543.8		11979.7	11228.1
				17532.8	11743.8		35373.4	17181.2		16562.5	16860.9
				8448.44	18789.1		23040.6	13218.8		13848.4	15504.7
				8292.19	24003.1		27185.9	18123.4		11009.4	16315.6
				16603.1	9843.75		40779.7	19545.3		11957.8	7684.38
				7562.5	10143.8		14346.9	33892.2		12156.2	8815.62
				9545.31	12656.2		13601.6	15571.9		18078.1	6951.56
				8943.75	15851.6		21004.7	16765.6		13325	12289.1
				14415.6	17134.4		37004.7	11848.4		15584.4	10135.9
				9845.31	7284.38		18328.1	16534.4		13389.1	17631.2
				11025	14060.9		18756.2	9095.31		11728.1	10307.8
				7050	24765.6		19976.6	16850		8725	11137.5
				7762.5	39170.3		21965.6	13478.1		11104.7	9468.75
				11240.6	11334.4		26726.6	19707.8		18059.4	13915.6
				17589.1	15187.5		26021.9	8837.5		11348.4	7850
				15495.3	10054.7		13904.7	18309.4		15915.6	8726.56
				13507.8	9401.56		19110.9	17279.7		17835.9	12003.1
				14220.3	17762.5		31871.9	38770.3		25106.2	9846.88
				12937.5	11642.2		28348.4	25084.4		13026.6	8885.94
				4284.38	13123.4		11837.5	17204.7		12437.5	28551.6
				6617.19	11143.8		17884.4	9446.88		9489.06	9262.5
				9704.69	13240.6		25534.4	27809.4		10985.9	10770.3
				8948.44	15354.7		21481.2	19351.6		18884.4	17039.1
				11718.8	11746.9		18318.8	14598.4		13345.3	11675
				11734.4	11473.4		19339.1	18750		13582.8	15467.2
				7618.75	11204.7		28820.3	12404.7		8726.56	13326.6
				8982.81	10850		17067.2	13331.2		15129.7	7559.38
				8700	9481.25		19665.6	16234.4		13065.6	7893.75
				15103.1	26270.3		34267.2	30657.8		12931.2	10642.2
				8909.38	11864.1		12468.8	14034.4		13404.7	12067.2
				10800	9478.12		22270.3	14810.9		12407.8	10353.1
				9254.69	17053.1		14115.6	17254.7		13298.4	18556.2
				4714.06	19896.9		20570.3	25328.1		14718.8	7034.38
				10695.3	10660.9		25932.8	18289.1		14710.9	13790.6
				12746.9	11529.7		13787.5	15562.5		14128.1	11128.1
				7503.12	17193.8		13585.9	20995.3		9431.25	11589.1
				12115.6	8625		11109.4	32393.8		11735.9	11462.5
				11398.4	35673.4		11087.5	17728.1		13660.9	19207.8
				6568.75	17535.9		36954.7	15790.6		14617.2	11503.1
				9115.62	57121.9		16157.8	19815.6		11415.6	11710.9
				9362.5	11762.5		10603.1	14465.6		6851.56	10657.8
				30451.6	14065.6		24346.9	20310.9		13525	18371.9
				22651.6	7220.31		15673.4	12554.7		9715.62	16710.9
				14129.7	26801.6		19090.6	11275		15578.1	10979.7
				14943.8	17046.9		16045.3	23575		14592.2	13720.3
				13078.1	12125		19984.4	21565.6		12210.9	13329.7
				7976.56	14176.6		18331.2	17768.8		13112.5	5145.31
				11870.3	18195.3		13656.2	16232.8		13875	13326.6
				7246.88	17509.4		12146.9	17215.6		12420.3	10145.3
				7525	32507.8		16660.9	16626.6		11434.4	8989.06
				24356.2	31564.1		16673.4	10284.4		10304.7	10040.6
				10976.6	36045.3		13754.7	18803.1		11493.8	14715.6
				10284.4	12771.9		15817.2	27281.2		12056.2	7901.56
				15104.7	11576.6		18756.2	22567.2		18915.6	10462.5
				16410.9	9773.44		28889.1	40346.9		25931.2	15434.4
				10450	9457.81		17914.1	9450		10331.2	10346.9
				14231.2	12410.9		14967.2	37067.2		16117.2	17175
				8784.38	13848.4		26807.8	29784.4		15126.6	13754.7
				11184.4	7393.75		7645.31	19564.1		12275	15267.2
				11039.1	10271.9		12829.7	16539.1		12907.8	26890.6
				8454.69	12995.3		15735.9	30437.5		11535.9	15900
				10635.9	8176.56		19414.1	12484.4		11617.2	10789.1
				10325	11695.3		15626.6	9798.44		15343.8	16903.1
				23575	25996.9		11075	18142.2		17273.4	20790.6
				12965.6	6506.25		25873.4	18200		13273.4	25114.1
				11320.3	10129.7		23890.6	16807.8		14345.3	10485.9
				12112.5	3612.5		14343.8	29582.8		8845.31	12179.7
				14967.2	21621.9		10803.1	19782.8		10100	9098.44
				10248.4	11442.2		18715.6	25143.8		16482.8	8717.19
				12582.8	20601.6		17654.7	12829.7		12603.1	12167.2
				12376.6	9089.06		13342.2	20903.1		13018.8	8775
				14168.8	7396.88		18275	23498.4		12989.1	12521.9
				14260.9	14632.8		24043.8	20012.5		14479.7	18276.6
				10732.8	10334.4		24296.9	15318.8		11376.6	10956.2
				11773.4	12571.9		13400	11765.6		16562.5	11507.8
				9973.44	8800		30685.9	12181.2		13676.6	13990.6
				11004.7	19501.6		19809.4	11123.4		15179.7	17632.8
				12459.4	19793.8		13306.2	50109.4		13201.6	7790
				16629.7	24868.8		11228.1	20664.1		14073.4	8322
				18000	14796.9		23712.5	12668.8		12875	19876.6
				12882.8	19175		24325	14035.9		14607.8	28090.6
				6559.38	19550		15682.8	12835.9		11684.4	8042.19
				17507.8	26401.6		18478.1	11787.5		16043.8	31276.6
				15920.3	22689.1		19626.6	13601.6		22851.6	8775
				17692.2	11075		17575	20118.8		13809.4	7907.81
				11442.2	29700		18662.5	12804.7		13384.4	8540.62
				13942.2	29487.5		13185.9	14321.9		20387.5	11503.1
				5696.88	13000		13664.1	26482.8		17906.2	11278.1
				8701.56	15721.9		14039.1	16453.1		10884.4	10465.6
				13937.5	17346.9		9012.5	21587.5		14468.8	15560.9
				28034.4	14596.9		18048.4	21718.8		13515.6	9520.31
				20462.5	9050		8807.81	24670.3		17971.9	10367.2
				10945.3	17304.7		15359.4	13106.2		14656.2	14220.3
				10771.9	12445.3		17876.6	21082.8		13981.2	9631.25
				16454.7	14023.4		16003.1	35731.2		12959.4	9679.69
				15596.9	10531.2		21995.3	22884.4		22237.5	10118.8
				16273.4	10878.1		31067.2	17434.4		15957.8	6606.25
				15096.9	12089.1		26660.9	22056.2		15179.7	9243.75
				6667.19	13028.1		19778.1	18743.8		10810.9	10814.1
				9956.25	15018.8		11390.6	16129.7		14148.4	9585.94
				19753.1	17278.1		23915.6	20028.1		14643.8	10178.1
				17471.9	9909.38		14309.4	15460.9		15256.2	9843.75
				13521.9	12125		16257.8	21318.8		11785.9	14251.6
				11881.2	18017.2		11001.6	21414.1		13112.5	9392.19
				42176.6	10817.2		29415.6	10550		15121.9	10500
				14967.2	12032.8		16371.9	13479.7		10318.8	6714.06
				24253.1	13587.5		26790.6	15325		8904.69	9515.62
				18092.2	12784.4		14860.9	14032.8		15859.4	19843.8
				13518.8	8867.19		11028.1	19553.1		16653.1	17084.4
				16634.4	13817.2		12723.4	18057.8		14676.6	7568.75
				34626.6	24284.4		11971.9	21873.4		13712.5	13757.8
				11457.8	14646.9		21414.1	29343.8		14620.3	10803.1
				36489.1	25489.1		12093.8	24496.9		11759.4	9792.19
				29782.8	15350		12398.4	15193.8		14698.4	10348.4
				21821.9	10335.9		9520.31	19007.8		14912.5	12968.8
				22985.9	9990.62		22679.7	11140.6		12568.8	9856.25
				41775	16890.6		22431.2	16317.2		9760.94	11982.8
				38982.8	12698.4		27281.2	22285.9		14828.1	10200
				16864.1	9328.12		20240.6	19178.1		15251.6	10096.9
				24503.1	9659.38		14846.9	18728.1		16982.8	8825
				43518.8	19004.7		11835.9	17721.9		15932.8	8225
				29414.1	24985.9		20234.4	11735.9		12931.2	8384.38
				22226.6	12160.9		17014.1	17187.5		15737.5	13250
				27793.8	11584.4		15653.1	17450		15879.7	12187.5
				20601.6	9165.62		19909.4	13182.8		23564.1	20054.7
				26370.3	10379.7		21856.2	15568.8		16250	7932.81
				22385.9	7559.38		22548.4	22354.7		19506.2	15021.9
				24618.8	25992.2		19678.1	18984.4		20682.8	10804.7
				75753.1	9442.19		15818.8	15553.1		17284.4	12231.2
				26376.6	13101.6		20221.9	16590.6		23673.4	8801.56
				22173.4	14382.8		19300	27837.5		22871.9	9329.69
				27498.4	28478.1		11785.9	30996.9		12803.1	8971.88
				22545.3	10939.1		19175	15606.2		21356.2	9354.69
				49031.2	27482.8		17223.4	25120.3		15559.4	9350
				34214.1	15931.2		21650	13978.1		15254.7	11515.6
				25376.6	6820.31		35440.6	16607.8		14568.8	9725
				21357.8	17076.6		17904.7	20185.9		17867.2	14937.5
				39826.6	13143.8		17040.6	22754.7		14651.6	11771.9
				29426.6	12378.1		33085.9	27206.2		13526.6	25482.8
				7540.62	11156.2		14195.3	18201.6		13996.9	24776.6
				9464.06	36020.3		15023.4	25335.9		16600	16364.1
				9273.44	17298.4		24668.8	21262.5		15871.9	8132.81
				20187.5	15737.5		13031.2	23178.1		14790.6	9509.38
				14107.8	20160.9		18500	18515.6		15734.4	10414.1
				19918.8	11498.4		15415.6	13151.6		10234.4	12721.9
				18237.5	17157.8		18232.8	15023.4		15514.1	14392.2
				10646.9	9662.5		45085.9	25854.7		12093.8	7720.31
				29460.9	13404.7		19707.8	12621.9		15804.7	10485.9
				21607.8	25384.4		18079.7	11893.8		11520.3	10468.8
				11187.5	11643.8		19682.8	13843.8		13565.6	14542.2
				14231.2	30964.1		21009.4	13475		15571.9	11039.1
				14364.1	20110.9		20960.9	18307.8		19645.3	9921.88
				26770.3	21212.5		21629.7	24289.1		16148.4	11737.5
				10235.9	7265.62		15996.9	10350		21267.2	13282.8
				11603.1	9492.19		18856.2	14292.2		21406.2	10665.6
				19284.4	13015.6		23703.1	12832.8		11026.6	10803.1
				10690.6	13557.8		11057.8	12057.8		13517.2	14678.1
				7178.12	65935.9		11128.1	16459.4		14245.3	16400
				11921.9	38515.6		16239.1	14520.3		14542.2	14043.8
				11889.1	33451.6		29273.4	12164.1		14114.1	13446.9
				6840.62	37145.3		26689.1	23900		14714.1	12887.5
				16129.7	9500		32665.6	11420.3		13875	11004.7
				13301.6	11376.6		19834.4	11089.1		14065.6	10046.9
				16104.7	12206.2		15526.6	15262.5		12292.2	13676.6
				18762.5	18289.1		20415.6	12656.2		8600	11864.1
				20360.9	26253.1		31806.2	9531.25		18604.7	10512.5
				11285.9	9546.88		11818.8	10837.5		14915.6	11823.4
				21206.2	43770.3		13051.6	16945.3		11695.3	15579.7
				14881.2	27534.4		28018.8	17639.1		12760.9	13146.9
				6698.44	12176.6		19756.2	17806.2		14206.2	12117.2
				8171.88	14910.9		15039.1	25718.8		10123.4	13790.6
				26471.9	18745.3		17959.4	19623.4		11193.8	14482.8
				11789.1	15284.4		15896.9	13878.1		9784.38	9895.31
				12134.4	13787.5		17676.6	11203		17907.8	13807.8
				6829.69	15671.9		20109.4	12721		11793.8	12778.1
				21829.7	13918.8		21075	17026		9706.25	17798.4
				9276.56	11645.3		22904.7	12014		11490.6	19339.1
				14600	15923.4		22965.6	12771		11204.7	14929.7
				33850	14893.8		14815.6	10562		11640.6	11443.8
				10296.9	11385.9		28507.8	11298		9585.94	20014.1
				14481.2	14284.4		23304.7	12002		11675	11914.1
				11198.4	18434.4		15923.4	16475		11971.9	8329.69
				15675	14834.4		21592.2	14932		12067.2	11048.4
				14315.6	12732.8		20350	16104		13225	15079.7
				10656.2	22928.1		17801.6	13451		17464.1	9795.31
				39429.7	16973.4		9985.94	17635		9950	10592.2
				34393.8	11687.5		18631.2	12597		9887.5	17740.6
				8196.88	19729.7		21237.5	12217		11032.8	12307.8
				5211.11	18964.1		17412.5	9710		10129.7	10209.4
				22205.6	13707.8		21226.6	8051		10171.9	12706.2
				27202.8	16929.7		11854.7	10189		10829.7	12757.8
				8488.89	16751.6		22835.9	23309		12807.8	10889.1
				12430.6	14203.1		19246.9	17173.4		11039.1	14309.4
				15283.3	15146.9		21781.2	20343.8		11604.7	12896.9
				22036.1	16785.9		15839.1	35831.2		12175	8157.81
				18011.1	29528.1		20295.3	16771.9		11775	8648.44
				14228.1	12018.8		15565.6	23753.1		12654.7	26304.7
				17375	10259.4		27546.9	17029.7		16232.8	13657.8
				16612.5	18048.4		21334.4	44568.8		13123.4	11050
				13050	8450		22198.4	24543.8		12764.1	16376.6
				13335.9	10320.3		13509.4	11657.8		12459.4	12553.1
				22206.2	18570.3		11575	23321.9		12685.9	14954.7
				10921.9	13425		9582.81	16712.5		10642.2	12671.9
				9170.31	9984.38		23612.5	18431.2		10409.4	13514.1
				26809.4	12193.8		9585.94	11868.8		10218.8	17020.3
				12423.4	17701.6		22551.6	13050		10282.8	17253.1
				9059.38	10857.8		11243.8	18995.3		10339.1	12825
				18400	14398.4		20315.6	13215.6		11009.4	15453.1
				15006.2	20384.4		17079.7	10339.1		11706.2	23493.8
				16039.1	23220.3		14921.9	16959.4		11903.1	15993.8
				17287.5	37370.3		25906.2	46389.1		15107.8	12998.4
				27942.2	12092.2		18729.7	28420.3		10307.8	13400
				20332.8	10382.8		14243.8	14985.9		10053.1	11414.1
				15682.8	31578.1		19429.7	15764.1		12276.6	15035.9
				14809.4	49151.6		14128.1	17087.5		9212.5	11409.4
				21037.5	17642.2		11375	10504.7		14990.6	11434.4
				12450	25715.6		17084.4	9265.62		12593.8	13673.4
				11584.4	6985.94		14078.1	9404.69		11970.3	12390.6
				13865.6	11518.8		11117.2	16401.6		9843.75	16873.4
				14737.5	14253.1		10834.4	11150		7109.38	14826.6
				13635.9	14259.4		10162.5	9471.88		11815.6	19487.5
				11443.8	21403.1		12735.9	9404.69		13165.6
				21714.1	13968.8		26734.4	10242.2		15887.5
				6231.25	4564.06		27218.8	10537.5		13357.8
				15162.5	12839.1		21017.2	6870.31		8225
				10354.7	14735.9		16601.6	17317.2		12379.7
				13200	38584.4		13462.5	14253.1		8539.06
				9350	14692.2		27768.8	13796.9		12701.6
				24060.9	11207.8		23667.2	16546.9		12464.1
				9131.25	11151.6		20053.1	11500		10823.4
				12665.6	25851.6		21389.1	15743.8		11710.9
				9050	29546.9		19062.5	11634.4		14407.8
				20800	19751.6		19629.7	11325		7932.81
				10184.4	28764.1		17820.3	12840.6		12628.1
				17309.4	21771.9		18232.8	18612.5		18098.4
				11244.4	14312.5		10785.9	18610.9		13042.2
				20738.9	23390.6		8979.69	19639.1		12998.4
				14283.3	18275		12559.4	16392.2		10678.1
				7236.11	19532.8		7071.88	21471.9		11162.5
				5108.33	33985.9		16014.1	21345.3		12539.1
				9958.33	27275		10028.1	14384.4		15382.8
				12375	17226.6		22437.5	26523.4		12612.5
				19180.6	28325		14082.8	20787.5		15596.9
				16813.9	23370.3		12704.7	14550		13431.2
				12102.8	21325		25500	24392.2		10498.4
				19360.9	18600		13839.1	16501.6		13476.6
				11737.5	10054.7		14579.7	16650		10278.1
				20457.8	16875		17593.8	23987.5		15703.1
				20031.2	45762.5		16110.9	17479.7		13706.2
				8975	68296.9		13112.5	23085.9		11506.2
				6804.69	11775		21687.5	16037.5		11535.9
				15004.7	11634.4		10229.7	16270.3		16309.4
				22370.3	20435.9		29007.8	21709.4		10843.8
				16928.1	18003.1		19434.4	28820.3		22734.4
				15843.8	13503.1		18992.2	11904.7		8885.94
				19395.3	16228.1		28090.6	18350		13150
				10189.1	6601.56		32359.4	15832.8		17292.2
				20168.8	13582.8		24231.2	12839.1		10040.6
				18753.1	31767.2		27253.1	11779.7		10395.3
				11132.8	9232.81		26271.9	16254.7		13292.2
				19018.8	49607.8		22607.8	10795.3		10803.1
				19018.8	33671.9		17746.9	11378.1		11596.9
				13653.1	10431.2		28279.7	16017.2		11529.7
				13653.1	13446.9		19253.1	13387.5		10914.1
				12692.2	14096.9		19646.9	13218.8		13001.6
				12692.2	31287.5		22178.1	16385.9		11042.2
				11721.9	39668.8		17257.8	14731.2		13890.6
				11721.9	31885.9		24857.8	16693.8		18439.1
				19507.8	19435.9		32168.8	21001.6		15878.1
				19507.8	48807.8		14939.1	30550		16921.9
				10568.8	17445.3		20681.2	10685.9		12514.1
				10568.8	20843.8		23785.9	24915.6		11270.3
				16442.2	13251.6		14232.8	71895.3		13887.5
				16442.2	22421.9		11839.1	14628.1		17220.3
				12828.1	14035.9		17584.4	33160.9		11101.6
				12828.1	15853.1		15126.6	20192.2		17201.6
				7387.5	22043.8		21303.1	27079.7		17062.5
				7387.5	28510.9		37282.8	22267.2		23310.9
				10235.9	16756.2		21760.9	13281.2		16025
				8843.75	21010.9		22781.2	11601.6		13606.2
				15900	27071.9		19457.8	13237.5		14820.3
				15925	28843.8		28356.2	18781.2		19775
				7623.44	14532.8		16412.5	11475		12460.9
				14989.1	34100		14520.3	29698.4		10323.4
				14732.8	31665.6		19204.7	14731.2		8704.69
				24707.8	13996.9		20526.6	16992.2		7590.62
				12364.1	20589.1		28589.1	17448.4		12250
				4034.38	51831.2		10923.4	37321.9		12709.4
				12914.1	13759.4		36923.4	13062.5		12650
				11293.8	10445.3		18271.9	17107.8		10703.1
				10429.7	10439.1		15084.4	22128.1		21646.9
				15192.2	26820.3		12278.1	13140.6		8225
				12300	13685.9		29517.2	12031.2		13140.6
				10998.4	37479.7		25854.7	17860.9		12548.4
				8609.38	8829.69		24996.9	18345.3		15284.4
				7031.25	42651.6		36045.3	19357.8		9443.75
				7128.12	15357.8		15946.9	17582.8		18748.4
				16714.1	13926.6		40654.7	20098.4		14137.5
				9139.06	42771.9		24717.2	24953.1		12935.9
				19200	20173.4		14578.1	24965.6		11521.9
				5498.44	47721.9		11654.7	18562.5		10246.9
				8460.94	25545.3		23128.1	14548.4		13737.5
				25054.7	15854.7		34612.5	15576.6		10010.9
				9678.12	52917.2		24064.1	20689.1		10642.2
				17731.2	28725		44421.9	22504.7		12075
				9485.94	29909.4		11395.3	16129.7		13745.3
				30528.1	13751.6		20521.9	19471.9		14028.1
				22545.3	15325		15325	24818.8		9723.44
				27918.8	36745.3		18765.6	27998.4		15551.6
				10553.1	42950		19046.9	24406.2		14923.4
				19803.1	23887.5		12800	20639.1		20032.8
				6543.75	18020.3		20656.2	16518.8		7850
				37282.8	38779.7		21120.3	17121.9		6559.38
				37365.6	27620.3		13218.8	11475		12328.1
				26462.5	21148.4		16395.3	31320.3		10978.1
				7514.06	33273.4		16643.8	98521.9		9585.94
				22010.9	6821.88		21485.9	13720.3		9585.94
				9196.88	36942.2		26292.2	18057.8		20512.5
				15976.6	26145.3		15614.1	23845.3		19960.9
				13695.3	20028.1		21975	13621.9		15776.6
				11962.5	8798.44		19859.4	11854.7		15151.6
				11762.5	29218.8		17156.2	12675		12793.8
				13565.6	35312.5		17331.2	10650		11967.2
				20287.5	8126.56		19928.1	17025		11609.4
				6445.31	12503.1		19234.4	15296.9		9812.5
				6473.44	24257.8		18356.2	23010.9		10979.7
				13448.4	9148.44		22846.9	26689.1		8006.25
				8731.25	13560.9		10942.2	10739.1		9964.06
				9553.12	16192.2		15434.4	13093.8		10493.8
				7700	19792.2		22042.2	21835.9		12879.7
				12575	18026.6		19837.5	35898.4		13148.4
				9021.88	20551.6		19828.1	17089.1		21925
				9600	45850		16629.7	19620.3		5970.31
				9842.19	25548.4		29012.5	26668.8		6457.81
				8350	13804.7		30321.9	16329.7		8035.94
				12550	14676.6		22515.6	11429.7		7243.75
				10031.2	17248.4		7775	62428.1		15278.1
				13851.6	16278.1		20321.9	12289.1		8240.62
				3754.69	9026.56		30940.6	24946.9		12939.1
				3570.31	27225		12112.5	25392.2		14493.8
					20745.3		24473.4	11420.3		8503.12
					17509.4		25534.4	9962.5		12253.1
					15776.6		18184.4	12271.9		12793.8
					22428.1		14200	14575		13389.1
					18418.8		29740.6	23157.8		5846.88
					14876.6		10637.5	21685.9		9500
					14418.8		18162.5	16900		19721.9
					13443.8		14343.8	13417.2		17012.5
					32296.9		16287.5	25357.8		10328.1
					10135.9		26442.2	12414.1		12942.2
					16151.6		15926.6	17064.1		13951.6
					25646.9		24845.3			10728.1
					32429.7		13937.5			22459.4
					14117.2		15714.1			17932.8
					69226.6		18289.1			9468.75
					21904.7		19987.5			15520.3
					42650		19134.4			12671.9
					14882.8		22879.7			15539.1
					7904.69		16907.8			11825
					25373.4		22435.9			21371.9
					43812.5		12106.2			14712.5
					37631.2		10101.6			15815.6
					18635.9		18142.2			21346.9
					21579.7		21948.4			19804.7
					11481.2		18481.2			16456.2
					12678.1		11856.2			15957.8
					23432.8		22140.6			18046.9
					16796.9		20985.9			15285.9
					13234.4		24314.1			13950
					19462.5		12915.6			9704.69
					50375		14806.2			17645.3
					16234.4		10787.5			17537.5
					17710.9		12543.8			13431.2
					28993.8		11232.8			13692.2
					20428.1		11515.6			15542.2
					14543.8		10112.5			27751.6
					16092.2		11919.4			13745.3
					25064.1		17705.6			14239.1
					17410.9		18280.6			14278.1
					7850		16622.2			10096.9
					39404.7		18786.1			12520.3
					23778.1		39713.9			8600
					18959.4		11222.2			10389.1
					10703.1		15594.4			15206.2
					13337.5		27802.8			12153.1
					33718.8		23888.9			11096.9
					18448.4		26250			11848.4
					10981.2		17511.1			8906.25
					38009.4		23452.8			6203.12
					14031.2		19166.7			15392.2
					26307.8		19138.9			10228.1
					10962.5		16125			13115.6
					19757.8		6996.88			21489.1
					35873.4		12765.6			14732.8
					21145.3		14501.6			11773.4
					18640.6		13512.5			9931.25
					16064.1		17179.7			10907.8
					20554.7		15012.5			7860.94
					14901.6		15684.4			11162.5
					18581.2		11359.4			10165.6
					20973.4		18684.4			21139.1
					17421.9		17018.8			12028.1
					32181.2		23365.6			12264.1
					31379.7		11615.6			12295.3
					27731.2		8475			13079.7
					11770.3		13631.2			15001.6
					13910.9		12606.2			13620.3
					19057.8		10110.9			12190.6
					27812.5		12414.1			17703.1
					13089.1		10614.1			11182.8
					27310.9		12301.6			12592.2
					16856.2		10448.4			9795.31
					10332.8		10007.8			11956.2
					14251.6		24179.7			23678.1
					18725		16342.2			11060.9
					15090.6		16893.8			16617.2
					16760.9		15443.8			23676.6
					16671.9		15425			16684.4
					30835.9		13134.4			21495.3
					12676.6		21432.8			18004.7
					20023.4		25840.6			25721.9
					24040.6		9779.69			11584.4
					16910.9		8510.94			18467.2
					18026.6		11957.8			20339.1
					15757.8		10603.1			32478.1
					17762.5		16325			18598.4
					17889.1		23953.1			17704.7
					37021.9		18909.4			17334.4
					42639.1		21446.9			13545.3
					40689.1		17701.6			12225
					47239.1		14034.4			20696.9
					27493.8		16606.2			13075
					21478.1		14301.6			10709.4
					10400		13606.2			19853.1
					13517.2		23340.6			17071.9
					11610.9		30268.8			9760.94
					11812.5		5404.69			10690.6
					19223.4		23307.8			10168.8
					18254.7		19719.4			10929.7
					34926.6		16422.2			12289.1
					17684.4		17061.1			17921.9
					28273.4		18091.7			10998.4
					25559.4		15813.9			10682.8
					29885.9		17511.1			14010.9
					37448.4		50358.3			24754.7
					36143.8		26794.4			21743.8
					43356.2		26469.4			7381.25
					12881.2		25986.1			23428.1
					31496.9		34294.4			18337.5
					10915.6		19708.3			9912.5
					15654.7		16627.8			19178.1
					14231.2		19175			10809.4
					26901.6		18308.3			27279.7
					23923.4		35316.7			17079.7
					14143.8		7011.11			15548.4
					22101.6		13777.8			22910.9
					21779.7		34416.7			15826.6
					10850		17983.3			18195.3
					26715.6		15002.8			18753.1
					8320.31		13750			24407.8
					8596.88		18183.3			15979.7
					9029.69		15441.7			17068.8
					7290.62		18983.3			20006.2
					19907.8		16325			28526.6
					13573.4		15141.7			11439.1
					29409.4		19286.1			15203.1
					13940.6		19355.6			19093.8
					16834.4		13222.2			13243.8
					33732.8		9990.62			12635.9
					27481.2		15743.8			11682.8
					11278.1		21179.7			12071.9
					14868.8		16548.4			13814.1
					20460.9		14151.6			13693.8
					7392.19		19678.1			11014.1
					17464.1		15448.4			17809.4
					21246.9		21021.9			15501.6
					21148.4		27896.9			12451.6
					9404.69		18603.1			17321.9
					34232.8		18076.6			9682.81
					22176.6		20843.8			11884.4
					18339.1		17514.1			13707.8
					13225		28543.8			14254.7
					31390.6		22175			14306.2
					38589.1		28281.2			16243.8
					11000		21137.5			17739.1
					15046.9		42084.4			26435.9
					23342.2		28470.3			10409.4
					11400		18881.2			20192.2
					15976.6		11990.6			14065.6
					12654.7		7464.06			14203.1
					12789.1		13200			13745.3
					35110.9		15282.8			10667.2
					14773.4		24740.6			11804.7
					34400		10406.2			19467.2
					24137.5		22579.7			9617.19
					13075		15865.6			10190.6
					13992.2		13853.1			9982.81
					8985.94		24518.8			12442.2
					17978.1		20235.9			12728.1
					22418.8		20235.9			12218.8
					39070.3		15018.8			9975
					31317.2		15018.8			10795.3
					25767.2		11560.9			7850
					28796.9		11560.9			14893.8
					7970.31		15881.2			13362.5
					15370.3		15881.2			22606.2
					20834.4		15993.8			12104.7
					12085.9		15993.8			8215.62
					33717.2		18953.1			9757.81
					14073.4		18953.1			15938.9
					10471.9		12218.8			14575
					14501.6		12218.8			15955.6
					27578.1		13553.1			13816.7
					13071.9		20645.3			13600
					13679.7		8860.94			10083.3
					14570.3		9259.38			16766.7
					19929.7		26859.4			7633.33
					14854.7		14895.3			21441.7
					14092.2		14662.5			16400
					12717.2		14373.4			16458.3
					13017.2		15875			16497.2
					12842.2		13648.4			8487.5
					15482.8		11398.4			8057.81
					32685.9		24825			9610.94
					14317.2		15421.9			11028.1
					14137.5		18834.4			7609.38
					22401.6		13418.8			8826.56
					18603.1		20354.7			10717.2
					17667.2		12246.9			11282.8
					31834.4		15464.1			9945.31
					21914.1		11237.5			8975
					17167.2		23118.8			9212.5
					20276.6		22631.2			7020.31
					15771.9		15328.1			11079.7
					12912.5		19343.8			9856.25
					15270.3		21723.4			14212.5
					14506.2		30550			9726.56
					18871.9		32853.1			10792.2
					10748.4		34070.3			9300
					8503.12		31618.8			8290.62
					9210.94		30457.8			10582.8
					17489.1		40804.7			8778.12
					12070.3		52629.7			10928.1
					10515.6		41140.6			9571.88
					12187.5		36131.2			13620.3
					11467.2		49976.6			11989.1
					5939.06		26890.6			16867.2
					31479.7		68796.9			12465.6
					9825		34870.3			12479.7
					22895.3		29965.6			12823.4
					12092.2		63231.2			8931.25
					13760.9		29618.8			15554.7
					18870.3		28387.5			6901.56
					16039.1		30092.2			10335.9
					12315.6		22409.4			11225
					16593.8		37850			16744.4
					24740.6		23968.8			10216.7
					17700		13809.4			30727.8
					17426.6		28042.2			27616.7
					31117.2		28704.7			18025
					14725		18773.4			14400
					25896.9		15398.4			18680.6
					14790.6		25468.8			17327.8
					16784.4		18407.8			12252.8
					11153.1		32225			23227.8
					80673.4		15346.9			15836.1
					12753.1		42787.5			15097.2
					27984.4		14332.8			11813.9
					32654.7		15132.8			20100
					34134.4		13804.7			12158.3
					28035.9		16139.1			8711.11
					9585.94		13653.1			15477.8
					27039.1		13728.1			15194.4
					62898.4		11176.6			10322.2
					27578.1		11071.9			9233.33
					115141		16101.6			10582.8
					22264.1		25353.1			12276.6
					25637.5		12985.9			14501.6
					33276.6		16792.2			10200
					95762.5		22048.4			12700
					65892.2		15092.2			12365.6
					48998.4		19009.4			14806.2
					11909.4		14339.1			8975
					8818.75		10598.4			13392.2
					40645.3		17504.7			9742.19
					67107.8		14303.1			13212.5
					59678.1					15860.9
					19270.3					10540.6
					43598.4					11442.2
					48067.2					8881.25
					15243.8					23703.1
					25601.6					13540.6
					29757.8					13656.2
					10175					13540.6
					10985.9					13315.6
					67421.9					15390.6
					14198.4					14407.8
					17415.6					20054.7
					15390.6					14164.1
					13296.9					11026.6
					29843.8					11459.4
					7308					20029.7
					12181					12756.2
					5123					6859.38
					12397					13179.7
					10316					10759.4
					20306					16985.9
					17004					8575
					8056					10612.5
					20564					11198.4
					32171					11943.8
					16096					12337.5
					10462					16515.6
					22039					15506.2
					8948					9445.31
					9758					13110.9
					16410					11923.4
					23882					17270.3
					11502					8459.38
					17806					12245.3
					8305					9862.5
					15544					11804.7
					28022					11871.9
					19507					10812.5
					9865					8654.69
					9558					9584.38
					7522					10237.5
					15057					16739.1
					7337					12357.8
					14653					11534.4
					8891					9395.31
					26292					12653.1
					9960					13250
					6102					12796.9
					9431					8781.25
					21450					13046.9
					42604.7					14892.2
					21553.1					12376.6
					15023.4					16410.9
					27473.4					10092.2
					40912.5					12329.7
					20287.5					15564.1
					28289.1					8470.31
					9887.5					5735.94
					14131.2					12121.9
					15303.1					9843.75
					18100					8235.94
					12382.8					12623.4
					20045.3					16375
					27562.5					13456.2
					17882.8					9304.69
					10534.4					12020.3
					17701.6					12478.1
					18681.2					14223.4
					11203.1					16275
					12042.2					10620.3
					14278.1					10264.1
					43198.4					8651.56
					13123.4					15535.9
					11243.8					15464.1
					8159.38					11253.1
					30757.8					16165.6
					30168.8					9078.12
					31990.6					10192.2
					24365.6					10850
					11790.6					15954.7
					13739.1					13095.3
					20387.5					9639.06
					19492.2					11789.1
					24945.3					12056.2
					22714.1					14759.4
					14490.6					12609.4
					29357.8					5721.88
					40262.5					12201.6
					13673.4					5209.38
					15803.1					14167.2
					9046.88					13064.1
					15546.9					10121.9
					17839.1					9267.19
					12637.5					11553.1
					8793.75					10457.8
					12114.1					12535.9
					8807.81					10470.3
					5951.56					10807.8
					12898.4					8115.62
					14737.5					8315.62
					9539.06					14139.1
					9834.38					14942.2
					11785.9					9089.06
					13706.2					10035.9
					27126.6					11307.8
					15259.4					11148.4
					9271.88					11204.7
					16378.1					10637.5
					12856.2					12995.3
					13946.9
					9295.31
					14789.1
					13218.8
					32421.9
					13385.9
					15395.3
					17520.3
					9610.94
					30246.9
					18265.6
					16453.1
					11859.4
					13384.4
					8342.19
					26359.4
					14640.6
					14654.7
					7056.25
					12231.2
					12475
					15623.4
					8971.88
					13742.2
					13990.6
					12142.2
					4628.12
					12135.9
					23514.1
					30504.7
					18657.8
					13496.9
					19487.5
					8701.56
					12529.7
					26045.3
					11962.5
					17803.1
					29628.1
					9642.19
					9126.56
					6217.19
					9785.94
					5434.38
					14979.7
					16435.9
					19751.6
					9146.88
					22350
					40237.5
					14979.7
					16681.2
					11471.9
					17907.8
					17150
					23818.8
					10367.2
					30093.8
					12356.2
					15112.5
					6975
					27521.9
					11284.4
					30796.9
					16703.1
					9890.62
					27503.1
					29190.6
					16303.1
					24346.9
					36512.5
					6843.75
					6285.94
					14793.8
					34359.4
					8828.12
					6859.38
					8609.38
					9398.44
					15979.7
					13482.8
					13570.3
					10656.2
					15018.8
					12978.1
					18960.9
					10920.3
					17770.3
					20598.4
					29387.5
					26760.9
					9875
					32875
					14953.1
					27614.1
					11001.6
					38176.6
					12687.5
					20304.7
					15615.6
					16296.9
					14689.1
					10985.9
					10093.8
					18873.4
					41067.2
					12771.9
					36839.1
					32543.8
					12842.2
					16587.5
					16590.6
					29418.8
					15570.3
					16906.2
					17926.6
					33501.6
					14804.7
					16568.8
					18184.4
					11310.9
					16325
					15448.4
					19003.1
					13535.9
					9598.44
					12318.8
					12731.2
					23082.8
					14835.9
					15795.3
					19412.5
					32793.8
					10060.9
					12478.1
					21770.3
					7520.31
					13490.6
					12539.1
					17073.4
					17545.3
					12401.6
					15156.2
					18750
					16160.9
					10825
					8504.69
					11517.2
					12356.2
					13782.8
					8023.44
					38612.5
					12559.4
					15693.8
					15462.5
					17446.9
					8654.69
					42693.8
					30981.2
					8721.88
					11200
					30276.6
					15070.3
					23717.2
					25904.7
					15500
					16570.3
					20431.2
					18715.6
					17248.4
					18801.6
					7390.62
					24973.4
					40393.8
					24489.1
					22042.2
					20120.3
					32748.4
					28739.1
					25107.8
					17054.7
					30768.8
					10151.6
					15057.8
					20910.9
					23976.6
					16579.7
					33643.8
					7196.88
					13057.8
					20873.4
					16628.1
					15065.6
					16215.6
					14078.1
					13310.9
					33945.3
					19779.7
					14635.9
					22043.8
					18975
					28014.1
					12251.6
					13209.4
					13312.5
					10396.9
					26801.6
					16223.4
					15271.9
					18121.9
					10378.1
					13751.6
					13734.4
					13353.1
					40689.1
					17221.9
					16162.5
					27520.3
					8562.5
					39951.6
					14446.9
					32301.6
					8475
					31851.6
					13196.9
					21137.5
					20082.8
					31637.5
					28284.4
					49371.9
					17131.2
					19681.2
					42607.8
					16023.4
					11028.1
					13562.5
					8357.81
					11675
					6957.81
					23089.1
					11718.8
					9368.75
					26687.5
					23307.8
					19509.4
					16115.6
					11528.1
					8992.19
					22157.8
					12285.9
					23823.4
					8531.25
					27439.1
					14457.8
					34120.3
					13306.2
					10656.2
					12581.2
					18364.1
					12087.5
					25682.8
					9864.06
					6434.38
					11850
					10026.6
					17050
					12962.5
					21384.4
					21798.4
					12607.8
					10100
					14085.9
					13287.5
					18539.1
					17489.1
					11748.4
					9723.44
					10910.9
					14562.5
					12857.8
					29203.1
					23946.9
					12651.6
					26029.7
					9823.44
					34801.6
					15884.4
					13851.6
					11917.2
					12751.6
					7215.62
					25151.6
					32843.8
					20485.9
					14257.8
					26631.2
					9595.31
					10581.2
					22390.6
					12721.9
					19171.9
					20401.6
					34073.4
					15490.6
					10231.2
					10145.3
					20365.6
					11301.6
					11795.3
					10840.6
					9154.69
					15115.6
					36273.4
					9368.75
					8692.19
					14989.1
					14712.5
					22410.9
					18800
					22304.7
					15106.2
					14779.7
					11093.8
					21539.1
					16121.9
					9287.5
					9150
					14512.5
					15289.1
					12037.5
					18103.1
					8085.94
					18418.8
					24378.1
					11939.1
					18229.7
					11607.8
					16812.5
					18931.2
					16414.1
					16884.4
					19948.4
					24760.9
					23700
					24285.9
					9426.56
					36604.7
					22164.1
					18137.5
					16968.8
					18892.2
					11682.8
					11779.7
					18292.2
					15168.8
					20370.3
					35557.8
					23421.9
					18096.9
					13128.1
					17178.1
					33417.2
					30184.4
					8475
					13217.2
					30282.8
					26034.4
					19534.4
					32203.1
					22429.7
					31876.6
					19193.8
					9671.88
					9315.62
					16137.5
					13859.4
					15512.5
					22759.4
					14137.5
					7814.06
					21779.7
					14718.8
					15992.2
					13285.9
					9995.31
					11421.9
					14040.6
					13757.8
					14864.1
					26273.4
					10856.2
					43031.2
					19171.9
					21840.6
					11692.2
					12631.2
					9460.94
					10576.6
					21532.8
					36879.7
					14318.8
					14321.9
					11753.1
					33018.8
					29217.2
					24670.3
					24971.9
					15500
					16959.4
					19523.4
					15206.2
					38398.4
					23279.7
					14342.2
					18125
					27535.9
					16659.4
					11926.6
					18075
					8671.88
					23067.2
					15764.1
					13540.6
					15470.3
					8862.5
					22507.8
					16035.9
					15134.4
					54165.6
					46943.8
					26551.6
					44268.8
					20885.9
					33615.6
					32143.8
					23226.6
					30098.4
					29917.2
					21390.6
					16156.2
					17798.4
					29882.8
					33403.1
					33609.4
					38926.6
					35454.7
					34754.7
					32339.1
					17021.9
					21801.6
					19778.1
					49157.8
					17262.5
					20292.2
					19939.1
					21589.1
					15684.4
					13673.4
					29017.2
					45801.6
					22584.4
					49996.9
					18121.9
					51951.6
					33410.9
					20101.6
					41459.4
					36292.2
					19612.5
					36039.1
					35485.9
					25703.1
					33976.6
					56693.8
					22185.9
					17450
					76475
					18306.2
					28376.6
					22065.6
					26889.1
					24657.8
					58395.3
					33889.1
					35012.5
					21642.2
					27384.4
					39462.5
					16756.2
					31276.6
					28557.8
					68598.4
					18006.2
					58246.9
					19145.3
					63798.4
					31306.2
					23848.4
					25265.6
					25092.2
					41620.3
					48128.1
