# Supplementary material for: CCDC32 stabilizes clathrin-coated pits and drives their invagination
Source: eLife. 2026 Jan 5;14:RP107039. doi: 10.7554/eLife.107039 (PMC12768407; doi:10.7554/eLife.107039)
Supplement: Figure 5—source data 1. [file elife-107039-fig5-data1.xlsx]

## Sheet: RawData
899685-899687: use GFP-nAb to co-IP from naïve ARPE-HPV cells;
899688-899690: use GFP-nAb to co-IP from ARPE-HPV cells that stably express AP2-Alpha-eGFP.
Description	Coverage [%]	# Peptides	# PSMs	MW [kDa]	Gene Symbol	Abundance_899685	Abundance_899686	Abundance_899687	Abundance_899688	Abundance_899689	Abundance_899690
Tubulin beta chain OS=Homo sapiens OX=9606 GN=TUBB PE=1 SV=2	46	18	687	49.6	TUBB	2.81213e+07	1.05222e+07	5.9353e+06	1.85837e+07	1.95278e+07	1.75508e+07
Tubulin beta-4B chain OS=Homo sapiens OX=9606 GN=TUBB4B PE=1 SV=1	46	18	602	49.8	TUBB4B	8.86603e+07	1.05425e+08	3.19595e+07	1.19269e+08	1.01146e+08	1.40972e+08
Tubulin beta-4A chain OS=Homo sapiens OX=9606 GN=TUBB4A PE=1 SV=2	44	16	558	49.6	TUBB4A	49454.4	10136		15426.2	57314.4	122115
AP-2 complex subunit beta OS=Homo sapiens OX=9606 GN=AP2B1 PE=1 SV=1	48	46	555	104.5	AP2B1	7.37334e+06	5.8111e+06	2.73768e+06	6.92202e+08	5.60133e+08	6.43322e+08
Tubulin beta-2B chain OS=Homo sapiens OX=9606 GN=TUBB2B PE=1 SV=1	46	18	526	49.9	TUBB2B	179172	107103	106103	267227	206766	199950
Tubulin beta-2A chain OS=Homo sapiens OX=9606 GN=TUBB2A PE=1 SV=1	46	18	525	49.9	TUBB2A	1.09259e+07	5.89269e+06	2.61771e+06	1.07789e+07	1.21567e+07	8.1659e+06
Plectin OS=Homo sapiens OX=9606 GN=PLEC PE=1 SV=3	30	129	524	531.5	PLEC	4.54522e+07	9.02694e+07	1.29661e+07	3.41938e+07	2.46699e+07	1.98766e+07
Heat shock cognate 71 kDa protein OS=Homo sapiens OX=9606 GN=HSPA8 PE=1 SV=1	66	34	450	70.9	HSPA8	1.22311e+08	7.79495e+07	3.48739e+07	8.41322e+07	7.76228e+07	7.95579e+07
AP-2 complex subunit alpha-2 (Fragment) OS=Homo sapiens OX=9606 GN=AP2A2 PE=1 SV=1	58	30	440	70.8		12639.8	5579.63		2.32014e+07	1.50452e+07	1.52821e+07
AP-2 complex subunit alpha-2 OS=Homo sapiens OX=9606 GN=AP2A2 PE=1 SV=2	43	33	413	103.9	AP2A2	3.60136e+06	1.18913e+06	685128	3.44198e+08	2.9861e+08	3.30567e+08
AP-1 complex subunit beta-1 OS=Homo sapiens OX=9606 GN=AP1B1 PE=1 SV=2	39	40	395	104.6	AP1B1	987346	354260	194423	6.13482e+07	5.19967e+07	6.26754e+07
Tubulin beta-6 chain OS=Homo sapiens OX=9606 GN=TUBB6 PE=1 SV=1	47	18	389	49.8	TUBB6	7.41371e+06	4.28204e+06	3.0603e+06	7.55605e+06	7.59523e+06	7.35931e+06
RelA-associated inhibitor OS=Homo sapiens OX=9606 GN=PPP1R13L PE=1 SV=4	54	35	326	89	PPP1R13L	6.43073e+07	5.3886e+07	2.26721e+07	4.70037e+07	4.40637e+07	4.72311e+07
Filamin-A OS=Homo sapiens OX=9606 GN=FLNA PE=1 SV=4	35	68	308	280.6	FLNA	3.83881e+07	2.26221e+07	1.0277e+07	3.01159e+07	2.24803e+07	2.57917e+07
AP-2 complex subunit alpha-1 OS=Homo sapiens OX=9606 GN=AP2A1 PE=1 SV=3	40	30	281	107.5	AP2A1	2.20803e+06	1.24876e+06	571059	1.3241e+08	1.26479e+08	1.73431e+08
Filamin-C OS=Homo sapiens OX=9606 GN=FLNC PE=1 SV=3	31	66	268	290.8	FLNC	2.88887e+07	2.13862e+07	8.58247e+06	1.56418e+07	1.28174e+07	1.46507e+07
ATP-dependent 6-phosphofructokinase, platelet type OS=Homo sapiens OX=9606 GN=PFKP PE=1 SV=2	42	27	263	85.5	PFKP	3.94281e+07	3.48236e+07	1.54065e+07	4.20339e+07	3.88107e+07	4.43221e+07
Ras GTPase-activating-like protein IQGAP3 OS=Homo sapiens OX=9606 GN=IQGAP3 PE=1 SV=2	32	47	260	184.6	IQGAP3	3.86241e+07	3.53979e+07	1.11147e+07	3.546e+07	3.1763e+07	3.5989e+07
DNA-dependent protein kinase catalytic subunit OS=Homo sapiens OX=9606 GN=PRKDC PE=1 SV=3	17	65	233	468.8	PRKDC	1.42494e+07	1.75427e+07	2.48482e+06	1.29616e+07	8.98804e+06	9.13063e+06
Heterogeneous nuclear ribonucleoprotein K OS=Homo sapiens OX=9606 GN=HNRNPK PE=1 SV=1	41	16	221	50.9	HNRNPK	2.27475e+07	1.66685e+07	9.84497e+06	2.64233e+07	2.24821e+07	2.312e+07
Elongation factor 1-alpha 1 OS=Homo sapiens OX=9606 GN=EEF1A1 PE=1 SV=1	40	15	218	50.1	EEF1A1	2.41914e+08	1.76356e+08	5.64088e+07	1.73729e+08	1.39345e+08	1.94639e+08
Vimentin OS=Homo sapiens OX=9606 GN=VIM PE=1 SV=4	70	36	212	53.6	VIM	9.93563e+07	7.42456e+07	2.98089e+07	7.8675e+07	7.47032e+07	5.86225e+07
AP-2 complex subunit mu OS=Homo sapiens OX=9606 GN=AP2M1 PE=1 SV=2	51	23	207	49.6	AP2M1	1.00062e+06	759129	224900	1.57632e+08	1.21622e+08	1.70793e+08
ATP-dependent 6-phosphofructokinase, liver type OS=Homo sapiens OX=9606 GN=PFKL PE=1 SV=6	24	18	195	85	PFKL	6.26569e+06	3.49613e+06	2.78561e+06	4.13379e+06	4.69829e+06	6.54012e+06
Endoplasmic reticulum chaperone BiP OS=Homo sapiens OX=9606 GN=HSPA5 PE=1 SV=2	48	27	186	72.3	HSPA5	1.40602e+07	8.99395e+06	5.28068e+06	1.53158e+07	1.34899e+07	1.3012e+07
Heat shock protein beta-1 OS=Homo sapiens OX=9606 GN=HSPB1 PE=1 SV=2	58	11	183	22.8	HSPB1	2.42357e+07	1.82376e+07	7.57732e+06	1.76537e+07	1.78238e+07	2.5372e+07
Tubulin alpha chain OS=Homo sapiens OX=9606 GN=TUBA1C PE=1 SV=1	40	18	171	57.7	TUBA1C	6.31115e+07	3.2508e+07	1.61197e+07	4.11874e+07	3.37184e+07	4.50678e+07
ATP-dependent RNA helicase DDX3X OS=Homo sapiens OX=9606 GN=DDX3X PE=1 SV=3	40	24	170	73.2	DDX3X	2.2738e+07	2.38156e+07	1.10401e+07	2.72882e+07	2.38414e+07	2.63851e+07
Smoothelin OS=Homo sapiens OX=9606 GN=SMTN PE=1 SV=7	35	28	166	99	SMTN	2.06917e+07	2.07672e+07	1.16865e+07	2.06482e+07	1.74277e+07	1.64854e+07
DEAD box protein 5 OS=Homo sapiens OX=9606 GN=DDX5 PE=1 SV=1	35	18	161	69	DDX5	8.75442e+06	7.23618e+06	2.20784e+06	7.68813e+06	7.34407e+06	7.74556e+06
Probable ATP-dependent RNA helicase DDX17 OS=Homo sapiens OX=9606 GN=DDX17 PE=1 SV=2	33	20	157	80.2	DDX17	2.03235e+07	1.78105e+07	1.05515e+07	2.44725e+07	2.01181e+07	2.05533e+07
Desmoplakin OS=Homo sapiens OX=9606 GN=DSP PE=1 SV=3	18	45	156	331.6	DSP	1.43499e+07	1.39855e+07	5.14229e+06	7.08225e+06	6.01151e+06	7.13195e+06
ATP synthase subunit alpha, mitochondrial OS=Homo sapiens OX=9606 GN=ATP5F1A PE=1 SV=1	29	16	152	59.7	ATP5A1	2.69773e+07	1.87244e+07	9.15042e+06	2.50082e+07	2.20943e+07	2.39824e+07
von Willebrand factor A domain-containing protein 8 OS=Homo sapiens OX=9606 GN=VWA8 PE=1 SV=2	26	41	146	214.7	VWA8	8.05215e+06	7.26352e+06	2.58492e+06	1.14802e+07	1.0696e+07	1.42519e+07
Filamin-B OS=Homo sapiens OX=9606 GN=FLNB PE=1 SV=2	20	41	144	278	FLNB	5.25274e+06	3.69547e+06	1.72471e+06	5.02559e+06	3.90922e+06	4.8168e+06
DNA replication licensing factor MCM5 OS=Homo sapiens OX=9606 GN=MCM5 PE=1 SV=5	31	22	142	82.2	MCM5	1.85142e+07	1.71421e+07	8.12678e+06	1.70653e+07	1.52642e+07	1.65643e+07
Epidermal growth factor receptor substrate 15 OS=Homo sapiens OX=9606 GN=EPS15 PE=1 SV=2	45	32	142	98.6	EPS15	1.73645e+06	331158	206227	3.17807e+07	3.2155e+07	3.22937e+07
ATP-dependent RNA helicase DDX3Y OS=Homo sapiens OX=9606 GN=DDX3Y PE=1 SV=2	32	20	140	73.1	DDX3Y	78344.8	69153.9	32751.9	157543	134312	98945.8
KN motif and ankyrin repeat domain-containing protein 2 OS=Homo sapiens OX=9606 GN=KANK2 PE=1 SV=1	43	28	137	91.1	KANK2	1.26665e+07	1.06714e+07	5.43651e+06	2.1693e+07	2.00708e+07	2.09331e+07
Peroxiredoxin-1 OS=Homo sapiens OX=9606 GN=PRDX1 PE=1 SV=1	50	14	135	22.1	PRDX1	2.89253e+08	6.72587e+06	2.89168e+06	1.10345e+07	8.36522e+06	8.46237e+06
DNA replication licensing factor MCM3 OS=Homo sapiens OX=9606 GN=MCM3 PE=1 SV=3	35	26	134	90.9	MCM3	1.65345e+07	1.51247e+07	5.2971e+06	1.61073e+07	1.27397e+07	1.36593e+07
Pyruvate kinase PKM OS=Homo sapiens OX=9606 GN=PKM PE=1 SV=4	49	23	130	57.9	PKM	2.11645e+07	1.52305e+07	1.03572e+07	2.97081e+07	2.13084e+07	2.37318e+07
ATPase family AAA domain-containing protein 3A OS=Homo sapiens OX=9606 GN=ATAD3A PE=1 SV=2	35	22	128	71.3	ATAD3A	1.13796e+07	1.0418e+07	3.45445e+06	1.43331e+07	1.18896e+07	1.58305e+07
Heterogeneous nuclear ribonucleoprotein M OS=Homo sapiens OX=9606 GN=HNRNPM PE=1 SV=3	43	25	128	77.5	HNRNPM	1.2988e+07	8.47114e+06	6.07431e+06	1.5651e+07	1.42691e+07	1.3311e+07
60S ribosomal protein L23 OS=Homo sapiens OX=9606 GN=RPL23 PE=1 SV=1	46	7	127	14.9	RPL23	8.31889e+06	7.49318e+06	1.63748e+06	1.2285e+07	9.60688e+06	1.18752e+07
5'-3' exoribonuclease 2 OS=Homo sapiens OX=9606 GN=XRN2 PE=1 SV=1	29	21	125	108.5	XRN2	1.80008e+07	1.57374e+07	5.51087e+06	1.38836e+07	1.40514e+07	1.65608e+07
Ras GTPase-activating-like protein IQGAP1 OS=Homo sapiens OX=9606 GN=IQGAP1 PE=1 SV=1	19	32	121	189.1	IQGAP1	6.46722e+06	6.22199e+06	2.06701e+06	9.35879e+06	7.9249e+06	1.00622e+07
Heat shock protein HSP 90-beta OS=Homo sapiens OX=9606 GN=HSP90AB1 PE=1 SV=4	29	19	119	83.2	HSP90AB1	3.71184e+07	7.48818e+06	3.8555e+06	1.45866e+07	1.19947e+07	1.22805e+07
Heat shock-related 70 kDa protein 2 OS=Homo sapiens OX=9606 GN=HSPA2 PE=1 SV=1	25	14	118	70	HSPA2	503372	413806	189023	525093	509151	656769
AP-2 complex subunit alpha-2 (Fragment) OS=Homo sapiens OX=9606 GN=AP2A2 PE=1 SV=1	61	4	113	9.8					27504.7	14786	6741.23
40S ribosomal protein S3 OS=Homo sapiens OX=9606 GN=RPS3 PE=1 SV=2	59	13	112	26.7	RPS3	1.25435e+07	8.86079e+06	2.90167e+06	2.0458e+07	1.69419e+07	1.77735e+07
Heat shock 70 kDa protein 1B OS=Homo sapiens OX=9606 GN=HSPA1B PE=1 SV=1	31	18	108	70.1		1.05464e+07	3.17406e+06	1.41042e+06	4.0334e+06	3.86071e+06	5.35427e+06
Tubulin alpha-4A chain OS=Homo sapiens OX=9606 GN=TUBA4A PE=1 SV=1	45	16	108	49.9	TUBA4A	2.79888e+06	2.49915e+06	1.15745e+06	2.64695e+06	2.01451e+06	2.2351e+06
Plakophilin-2 OS=Homo sapiens OX=9606 GN=PKP2 PE=1 SV=2	29	21	106	97.4	PKP2	1.0198e+07	9.91142e+06	6.11003e+06	1.65494e+07	1.26961e+07	1.16688e+07
Myosin-9 OS=Homo sapiens OX=9606 GN=MYH9 PE=1 SV=4	19	33	105	226.4	MYH9	9.58217e+06	6.25572e+06	2.56614e+06	5.12905e+06	4.14823e+06	5.16948e+06
60 kDa heat shock protein, mitochondrial OS=Homo sapiens OX=9606 GN=HSPD1 PE=1 SV=2	47	20	99	61	HSPD1	1.13848e+07	7.13668e+06	4.54898e+06	1.54324e+07	1.08753e+07	1.28298e+07
Cell cycle and apoptosis regulator protein 2 OS=Homo sapiens OX=9606 GN=CCAR2 PE=1 SV=2	31	22	98	102.8	CCAR2; KIAA1967	7.6772e+06	5.93123e+06	2.86112e+06	7.41506e+06	7.70657e+06	8.91777e+06
Pleckstrin homology-like domain family B member 2 OS=Homo sapiens OX=9606 GN=PHLDB2 PE=1 SV=2	16	17	96	142.1	PHLDB2	5.02996e+06	4.88915e+06	1.94084e+06	4.29466e+06	3.56396e+06	4.0964e+06
Neuroblast differentiation-associated protein AHNAK OS=Homo sapiens OX=9606 GN=AHNAK PE=1 SV=2	16	35	92	628.7	AHNAK	3.42073e+06	1.84488e+06	601437	2.97006e+06	2.27625e+06	2.03576e+06
ADP/ATP translocase 2 OS=Homo sapiens OX=9606 GN=SLC25A5 PE=1 SV=7	37	12	91	32.8	SLC25A5	1.66982e+07	1.41145e+07	3.25549e+06	1.76515e+07	1.75849e+07	2.39783e+07
Major vault protein OS=Homo sapiens OX=9606 GN=MVP PE=1 SV=4	32	23	90	99.3	MVP	7.94223e+06	5.40238e+06	3.23052e+06	6.05349e+06	5.60586e+06	4.51035e+06
CAD protein OS=Homo sapiens OX=9606 GN=CAD PE=1 SV=3	14	26	89	242.8	CAD	5.06129e+06	3.50216e+06	1.07977e+06	4.02167e+06	3.34388e+06	5.09223e+06
Heterogeneous nuclear ribonucleoprotein M (Fragment) OS=Homo sapiens OX=9606 GN=HNRNPM PE=1 SV=1	50	16	89	40		99529.8	60541.6	71443.3	135177	135027	79173.4
40S ribosomal protein SA OS=Homo sapiens OX=9606 GN=RPSA PE=1 SV=4	38	9	88	32.8	RPSA	7.07773e+06	5.02495e+06	2.55149e+06	1.7592e+07	1.73772e+07	1.69062e+07
ATP synthase subunit beta, mitochondrial OS=Homo sapiens OX=9606 GN=ATP5F1B PE=1 SV=3	34	13	88	56.5	ATP5B	4.31106e+06	1.75376e+06	766470	3.09617e+06	3.26472e+06	5.97819e+06
E3 ubiquitin-protein ligase UBR5 OS=Homo sapiens OX=9606 GN=UBR5 PE=1 SV=2	12	26	88	309.2	UBR5	4.11773e+06	4.94713e+06	895045	3.72609e+06	2.54101e+06	2.69303e+06
Microtubule-associated protein 4 OS=Homo sapiens OX=9606 GN=MAP4 PE=1 SV=3	23	22	88	120.9	MAP4	8.33975e+06	4.45803e+06	1.93385e+06	9.32651e+06	7.66162e+06	7.83936e+06
Talin-1 OS=Homo sapiens OX=9606 GN=TLN1 PE=1 SV=3	18	32	88	269.6	TLN1	3.81873e+06	1.53294e+06	1.14261e+06	2.78643e+06	2.02125e+06	2.56626e+06
Poly(rC)-binding protein 1 OS=Homo sapiens OX=9606 GN=PCBP1 PE=1 SV=2	42	12	87	37.5	PCBP1	1.31556e+07	5.87253e+06	3.1846e+06	7.8997e+06	6.49013e+06	5.73712e+06
Sepiapterin reductase OS=Homo sapiens OX=9606 GN=SPR PE=1 SV=1	5	1	87	28	SPR	8.74051e+07	8.26616e+07	3.2275e+07	1.26242e+08	9.76307e+07	8.80374e+07
Eukaryotic translation initiation factor 4 gamma 2 OS=Homo sapiens OX=9606 GN=EIF4G2 PE=1 SV=1	26	21	86	102.3	EIF4G2	3.43694e+06	3.42237e+06	1.25e+06	5.09431e+06	4.47162e+06	4.57573e+06
WD repeat-containing protein 11 OS=Homo sapiens OX=9606 GN=WDR11 PE=1 SV=1	18	21	85	136.6	WDR11	6.49406e+06	4.65418e+06	2.06291e+06	7.46644e+06	6.57759e+06	5.86804e+06
DnaJ homolog subfamily A member 3, mitochondrial OS=Homo sapiens OX=9606 GN=DNAJA3 PE=1 SV=2	20	9	84	52.5	DNAJA3	4.9743e+06	3.16891e+06	1.72379e+06	6.58419e+06	5.99923e+06	5.87865e+06
Plakophilin-4 OS=Homo sapiens OX=9606 GN=PKP4 PE=1 SV=2	26	24	84	131.8	PKP4	5.42446e+06	5.99366e+06	3.25551e+06	9.21848e+06	7.60093e+06	7.54684e+06
Sickle tail protein homolog OS=Homo sapiens OX=9606 GN=KIAA1217 PE=1 SV=2	16	25	84	214	KIAA1217	2.40928e+06	2.55809e+06	949279	3.1001e+06	2.58676e+06	3.02554e+06
AP2-associated protein kinase 1 OS=Homo sapiens OX=9606 GN=AAK1 PE=1 SV=3	32	21	83	103.8	AAK1	260618	206014	98016.1	3.2431e+07	2.53317e+07	2.72985e+07
Calcium-binding mitochondrial carrier protein Aralar2 OS=Homo sapiens OX=9606 GN=SLC25A13 PE=1 SV=2	34	18	83	74.1	SLC25A13	2.51419e+06	2.08019e+06	865466	3.24094e+06	2.89604e+06	3.76342e+06
Heat shock protein HSP 90-alpha OS=Homo sapiens OX=9606 GN=HSP90AA1 PE=1 SV=5	22	14	83	84.6	HSP90AA1	2.52705e+06	686571	215542	446534	590253	1.04667e+06
Nuclear receptor corepressor 2 OS=Homo sapiens OX=9606 GN=NCOR2 PE=1 SV=1	10	19	83	267.9	NCOR2	2.55815e+06	2.31809e+06	826555	2.95487e+06	2.48536e+06	3.27315e+06
Prelamin-A/C OS=Homo sapiens OX=9606 GN=LMNA PE=4 SV=1	28	19	81	80.9		8.61792e+06	4.56174e+06	2.84888e+06	6.54968e+06	6.03175e+06	4.07332e+06
Protein disulfide-isomerase A6 OS=Homo sapiens OX=9606 GN=PDIA6 PE=1 SV=1	16	6	81	48.1	PDIA6	6.03565e+06	4.08028e+06	1.6805e+06	4.00713e+06	6.02456e+06	7.17581e+06
Fatty acid synthase OS=Homo sapiens OX=9606 GN=FASN PE=1 SV=3	14	29	80	273.3	FASN	1.26356e+07	2.16247e+06	1.79515e+06	3.41546e+06	3.05994e+06	3.28088e+06
Constitutive coactivator of peroxisome proliferator-activated receptor gamma OS=Homo sapiens OX=9606 GN=FAM120B PE=1 SV=1	18	13	79	106	FAM120B	3.3044e+06	1.84806e+06	680084	3.31144e+06	3.15523e+06	2.92946e+06
Protein PRRC2A OS=Homo sapiens OX=9606 GN=PRRC2A PE=1 SV=3	16	24	79	228.7	PRRC2A	2.33227e+06	1.78314e+06	675379	3.90383e+06	2.77924e+06	2.8e+06
Pyrroline-5-carboxylate reductase 2 OS=Homo sapiens OX=9606 GN=PYCR2 PE=1 SV=1	38	12	79	33.6	PYCR2	4.76207e+06	4.48408e+06	1.45626e+06	6.95948e+06	5.85908e+06	7.85652e+06
RNA-splicing ligase RtcB homolog OS=Homo sapiens OX=9606 GN=RTCB PE=1 SV=1	30	13	77	55.2	C22orf28; RTCB	8.33292e+06	7.22453e+06	2.29558e+06	6.29394e+06	5.50351e+06	8.98805e+06
RNA-binding protein 14 OS=Homo sapiens OX=9606 GN=RBM14 PE=1 SV=2	30	14	75	69.4	RBM14; RBM14-RBM4	6.45457e+06	7.55571e+06	2.9892e+06	1.452e+07	1.12421e+07	1.31574e+07
Ubiquitin-40S ribosomal protein S27a (Fragment) OS=Homo sapiens OX=9606 GN=RPS27A PE=1 SV=1	44	4	75	12.2		7.72007e+06	5.16786e+06	1.73565e+06	1.14856e+07	7.9503e+06	9.26758e+06
E3 ubiquitin-protein ligase TRIM32 OS=Homo sapiens OX=9606 GN=TRIM32 PE=1 SV=2	28	14	74	71.9	TRIM32	2.41681e+06	1.77252e+06	516979	2.47708e+06	2.3558e+06	4.00084e+06
DNA replication licensing factor MCM7 OS=Homo sapiens OX=9606 GN=MCM7 PE=1 SV=4	30	18	73	81.3	MCM7	5.43957e+06	3.62358e+06	1.45109e+06	4.2183e+06	4.87516e+06	5.39064e+06
Epidermal growth factor receptor OS=Homo sapiens OX=9606 GN=EGFR PE=1 SV=2	13	15	73	134.2	EGFR	352154	307295	142016	1.20585e+07	1.20108e+07	1.63382e+07
Epidermal growth factor receptor substrate 15-like 1 OS=Homo sapiens OX=9606 GN=EPS15L1 PE=1 SV=1	39	23	73	83.4		269546	12283.4	18651.6	1.00897e+07	1.02609e+07	1.15077e+07
Eukaryotic initiation factor 4A-I OS=Homo sapiens OX=9606 GN=EIF4A1 PE=1 SV=1	35	12	73	46.1	EIF4A1	1.12287e+07	1.00215e+07	3.12414e+06	1.09669e+07	8.03416e+06	1.06141e+07
Serine/arginine repetitive matrix protein 2 OS=Homo sapiens OX=9606 GN=SRRM2 PE=1 SV=2	8	14	71	299.4	SRRM2	2.56596e+06	2.367e+06	1.49871e+06	6.32996e+06	5.67045e+06	5.53826e+06
Clathrin heavy chain OS=Homo sapiens OX=9606 GN=CLTC PE=1 SV=1	16	22	69	191.9	CLTC	4.79323e+06	1.75741e+06	627670	3.47184e+06	3.15314e+06	5.30706e+06
Septin-9 OS=Homo sapiens OX=9606 GN=SEPTIN9 PE=1 SV=2	25	14	69	65.4	SEPT9	4.87189e+06	4.46741e+06	1.92128e+06	7.61681e+06	6.10879e+06	5.95925e+06
60S acidic ribosomal protein P0 OS=Homo sapiens OX=9606 GN=RPLP0 PE=1 SV=1	44	10	68	34.3	RPLP0	8.27047e+06	6.73047e+06	1.1795e+06	1.62781e+07	1.10515e+07	1.63143e+07
Catenin delta-1 OS=Homo sapiens OX=9606 GN=CTNND1 PE=1 SV=2	24	17	68	104.8	CTNND1	3.4176e+06	2.77124e+06	1.14637e+06	3.0814e+06	2.6572e+06	2.44858e+06
Glyceraldehyde-3-phosphate dehydrogenase OS=Homo sapiens OX=9606 GN=GAPDH PE=1 SV=3	41	12	68	36	GAPDH	2.36727e+07	1.2792e+07	7.51843e+06	1.47841e+07	8.84828e+06	1.19152e+07
Anillin OS=Homo sapiens OX=9606 GN=ANLN PE=1 SV=2	18	18	67	124.1	ANLN	3.16674e+06	3.10454e+06	1.2668e+06	3.37703e+06	2.84372e+06	2.54338e+06
Heterogeneous nuclear ribonucleoprotein H OS=Homo sapiens OX=9606 GN=HNRNPH1 PE=1 SV=1	25	8	67	47.1	HNRNPH1	5.55466e+06	2.71921e+06	921649	5.13872e+06	5.98989e+06	7.15378e+06
High density lipoprotein binding protein (Vigilin), isoform CRA_a OS=Homo sapiens OX=9606 GN=HDLBP PE=1 SV=1	23	22	67	141.4	HDLBP	2.12328e+06	1.33886e+06	725393	3.35746e+06	3.76501e+06	3.63599e+06
Pyrroline-5-carboxylate reductase 1, mitochondrial OS=Homo sapiens OX=9606 GN=PYCR1 PE=1 SV=2	42	12	67	33.3	PYCR1	7.84173e+06	7.1131e+06	2.91406e+06	8.19981e+06	8.00591e+06	1.0457e+07
Cytoskeleton-associated protein 4 OS=Homo sapiens OX=9606 GN=CKAP4 PE=1 SV=2	38	17	66	66	CKAP4	3.02825e+06	2.04947e+06	1.53766e+06	7.60282e+06	6.07206e+06	4.76207e+06
Pyrroline-5-carboxylate reductase 3 OS=Homo sapiens OX=9606 GN=PYCR3 PE=1 SV=3	31	7	66	28.6	PYCRL; PYCR3	9.50392e+06	1.11354e+07	5.01442e+06	1.09963e+07	8.74406e+06	1.10335e+07
Ribosome-binding protein 1 OS=Homo sapiens OX=9606 GN=RRBP1 PE=1 SV=5	34	24	66	152.4		1.36942e+06	934824	593240	3.33745e+06	2.80518e+06	2.56696e+06
Ras GTPase-activating protein-binding protein 1 OS=Homo sapiens OX=9606 GN=G3BP1 PE=1 SV=1	20	7	65	52.1	G3BP1	1.66953e+06	1.28769e+06	609191	2.04025e+06	2.31435e+06	2.42646e+06
AP2-associated protein kinase 1 (Fragment) OS=Homo sapiens OX=9606 GN=AAK1 PE=1 SV=1	38	14	64	54.4		74684.3	109089	25250.4	1.54821e+07	1.48367e+07	1.56801e+07
60S ribosomal protein L12 OS=Homo sapiens OX=9606 GN=RPL12 PE=1 SV=1	48	6	63	17.8	RPL12	1.22597e+07	9.09275e+06	4.24915e+06	2.0206e+07	1.61237e+07	2.38551e+07
Alpha-enolase OS=Homo sapiens OX=9606 GN=ENO1 PE=1 SV=2	41	16	63	47.1	ENO1	1.5876e+07	3.52013e+06	2.59272e+06	3.9891e+06	2.50077e+06	3.97735e+06
ATP-dependent 6-phosphofructokinase, muscle type OS=Homo sapiens OX=9606 GN=PFKM PE=1 SV=2	21	14	63	85.1	PFKM	898645	843870	184042	1.89855e+06	1.09628e+06	1.54977e+06
Erbin OS=Homo sapiens OX=9606 GN=ERBIN PE=1 SV=2	18	17	63	158.2	ERBB2IP; ERBIN	1.94832e+06	1.75116e+06	665994	1.75591e+06	1.92502e+06	1.8677e+06
Poly(rC)-binding protein 2 OS=Homo sapiens OX=9606 GN=PCBP2 PE=1 SV=1	32	9	63	33.8	PCBP2	2.95628e+06	2.40632e+06	626563	2.38347e+06	1.79589e+06	2.41959e+06
Protein FAM83H OS=Homo sapiens OX=9606 GN=FAM83H PE=1 SV=1	16	15	63	149		1.83862e+06	1.89191e+06	426305	1.97633e+06	1.90839e+06	1.88675e+06
60S ribosomal protein L7 OS=Homo sapiens OX=9606 GN=RPL7 PE=1 SV=1	23	8	62	29.2	RPL7	8.3259e+06	6.53121e+06	1.71874e+06	1.68028e+07	1.23483e+07	1.84225e+07
PDZ and LIM domain protein 7 OS=Homo sapiens OX=9606 GN=PDLIM7 PE=1 SV=1	30	12	62	49.8	PDLIM7	1.13995e+07	9.77815e+06	3.09555e+06	9.41307e+06	9.14927e+06	1.28285e+07
Polyadenylate-binding protein OS=Homo sapiens OX=9606 GN=PABPC1 PE=1 SV=1	30	15	62	58.5		8.23071e+06	8.64135e+06	2.33949e+06	7.44482e+06	6.71803e+06	11621362
Coiled-coil and C2 domain-containing protein 1A OS=Homo sapiens OX=9606 GN=CC2D1A PE=1 SV=1	19	16	61	104	CC2D1A	6.031e+06	5.63097e+06	2.95501e+06	1.18271e+07	1.21819e+07	1.24689e+07
Protein PRRC2B OS=Homo sapiens OX=9606 GN=PRRC2B PE=1 SV=2	13	19	61	242.8	PRRC2B	1.00009e+06	693133	337293	1.5886e+06	1.40534e+06	1.85685e+06
Sodium/potassium-transporting ATPase subunit alpha-1 OS=Homo sapiens OX=9606 GN=ATP1A1 PE=1 SV=1	21	17	61	112.8	ATP1A1	3.2413e+06	1.78361e+06	1.19836e+06	3.21048e+06	2.34192e+06	2.73266e+06
ATP-dependent RNA helicase DDX1 OS=Homo sapiens OX=9606 GN=DDX1 PE=1 SV=2	23	15	59	82.4	DDX1	9.5408e+06	1.09177e+07	4.16148e+06	1.11568e+07	7.79107e+06	9.31706e+06
CDKN2A-interacting protein OS=Homo sapiens OX=9606 GN=CDKN2AIP PE=1 SV=3	38	16	59	61.1	CDKN2AIP	1.89056e+06	1.97542e+06	1.47985e+06	2.8468e+06	1.87722e+06	1.57799e+06
Pleckstrin homology domain-containing family A member 7 (Fragment) OS=Homo sapiens OX=9606 GN=PLEKHA7 PE=1 SV=1	13	13	59	135.3		996809	919809	427528	3.81244e+06	3.13489e+06	3.55546e+06
Sulfide:quinone oxidoreductase, mitochondrial OS=Homo sapiens OX=9606 GN=SQOR PE=1 SV=1	39	15	59	49.9	SQRDL; SQOR	2.55147e+06	2.59026e+06	1.13896e+06	6.28306e+06	5.23349e+06	5.65924e+06
60S ribosomal protein L11 OS=Homo sapiens OX=9606 GN=RPL11 PE=1 SV=2	29	5	58	20.2	RPL11	1.16936e+07	8.06579e+06	1.57753e+06	1.56907e+07	1.2467e+07	1.43378e+07
Alpha-actinin-4 OS=Homo sapiens OX=9606 GN=ACTN4 PE=1 SV=2	22	16	58	104.8	ACTN4	3.15192e+06	1.3607e+06	909743	2.75445e+06	2.85619e+06	2.76597e+06
Calcium-binding mitochondrial carrier protein Aralar1 OS=Homo sapiens OX=9606 GN=SLC25A12 PE=1 SV=2	31	18	58	74.7	SLC25A12	3.77673e+06	3.1985e+06	1.20631e+06	4.81124e+06	4.61958e+06	5.47182e+06
Complex I assembly factor ACAD9, mitochondrial OS=Homo sapiens OX=9606 GN=ACAD9 PE=1 SV=1	22	14	58	68.7	ACAD9	2.9564e+06	3.67739e+06	1.57779e+06	4.83365e+06	4.10365e+06	3.76855e+06
Histone H4 OS=Homo sapiens OX=9606 GN=H4C1 PE=1 SV=2	51	6	58	11.4	HIST1H4A; HIST1H4F; HIST1H4D; HIST1H4J; HIST2H4A; HIST2H4B; HIST1H4H; HIST1H4C; HIST4H4; HIST1H4E; HIST1H4I; HIST1H4B; HIST1H4K; HIST1H4L	2.4749e+07	1.23175e+07	1.49043e+06	1.52029e+07	1.48854e+07	1.70571e+07
Pre-mRNA-splicing factor ATP-dependent RNA helicase DHX15 OS=Homo sapiens OX=9606 GN=DHX15 PE=1 SV=2	16	12	58	90.9	DHX15	2.09581e+06	1.37808e+06	373193	2.39184e+06	1.96047e+06	2.79485e+06
Protein NipSnap homolog 1 OS=Homo sapiens OX=9606 GN=NIPSNAP1 PE=1 SV=1	25	7	57	33.3	NIPSNAP1	6.36752e+06	5.95966e+06	2.6631e+06	5.65524e+06	8.40965e+06	1.44738e+07
Catenin alpha-1 OS=Homo sapiens OX=9606 GN=CTNNA1 PE=1 SV=1	21	15	56	100	CTNNA1	2.79051e+06	2.68915e+06	1.25967e+06	4.50537e+06	3.37886e+06	3.49773e+06
Beta-actin-like protein 2 OS=Homo sapiens OX=9606 GN=ACTBL2 PE=1 SV=2	14	4	55	42	ACTBL2				92328.6	96955.5
Bifunctional glutamate/proline--tRNA ligase OS=Homo sapiens OX=9606 GN=EPRS1 PE=1 SV=5	16	18	55	170.5	EPRS	5.8096e+06	1.31273e+06	554252	2.74474e+06	2.09624e+06	2.30253e+06
Far upstream element-binding protein 2 OS=Homo sapiens OX=9606 GN=KHSRP PE=1 SV=4	36	18	55	73.1	KHSRP	7.42586e+06	1.78509e+06	996110	2.49934e+06	1.92282e+06	2.45706e+06
Histone H1.2 OS=Homo sapiens OX=9606 GN=H1-2 PE=1 SV=2	42	12	55	21.4	HIST1H1C	7.74466e+07	1.15704e+06	583770	5.17003e+06	4.7255e+06	6.62819e+06
40S ribosomal protein S18 OS=Homo sapiens OX=9606 GN=RPS18 PE=1 SV=3	44	8	54	17.7	RPS18	3.45908e+06	3.60989e+06	1.07116e+06	1.07003e+07	8.8689e+06	1.02321e+07
Protein FAM91A1 OS=Homo sapiens OX=9606 GN=FAM91A1 PE=1 SV=3	14	11	54	93.9	FAM91A1	5.35314e+06	2.5259e+06	642800	2.71436e+06	2.97969e+06	6.1254e+06
Protein transport protein sec16 OS=Homo sapiens OX=9606 GN=SEC16A PE=1 SV=1	11	18	54	249.3	SEC16A	3.93019e+06	1.87099e+06	856533	1.8513e+06	1.43903e+06	1.5292e+06
General transcription factor II-I OS=Homo sapiens OX=9606 GN=GTF2I PE=1 SV=2	20	17	53	112.3	GTF2I	3.63573e+06	1.75597e+06	588668	2.76065e+06	2.20432e+06	2.3166e+06
Prohibitin OS=Homo sapiens OX=9606 GN=PHB2 PE=1 SV=1	48	13	53	29.7		3.81176e+06	3.47683e+06	1.34228e+06	5.54817e+06	4.70822e+06	5.59959e+06
Serine/threonine-protein kinase PAK 4 OS=Homo sapiens OX=9606 GN=PAK4 PE=1 SV=1	24	9	53	64	PAK4	3.83631e+06	2.98965e+06	1.29276e+06	3.90917e+06	3.09102e+06	4.57906e+06
Transcription intermediary factor 1-beta OS=Homo sapiens OX=9606 GN=TRIM28 PE=1 SV=5	35	18	53	88.5	TRIM28	1.8734e+07	364233	241750	688165	620583	510193
40S ribosomal protein S3a OS=Homo sapiens OX=9606 GN=RPS3A PE=1 SV=2	47	12	52	29.9	RPS3A	3.51617e+06	2.15634e+06	634386	8.16581e+06	6.53764e+06	9.36589e+06
C-1-tetrahydrofolate synthase, cytoplasmic OS=Homo sapiens OX=9606 GN=MTHFD1 PE=1 SV=3	22	18	52	101.5	MTHFD1	3.35521e+06	2.35236e+06	755942	2.89831e+06	2.21112e+06	2.98247e+06
Heterogeneous nuclear ribonucleoprotein U OS=Homo sapiens OX=9606 GN=HNRNPU PE=1 SV=1	15	10	52	81.7		4.42694e+06	1.75451e+06	506553	3.83518e+06	4.00737e+06	5.34808e+06
60S ribosomal protein L4 OS=Homo sapiens OX=9606 GN=RPL4 PE=1 SV=5	31	13	51	47.7	RPL4	3.81098e+06	2.44131e+06	984439	9.249e+06	7.46448e+06	1.23363e+07
Cofilin-1 OS=Homo sapiens OX=9606 GN=CFL1 PE=1 SV=3	33	6	51	18.5	CFL1	1.12473e+07	2.79532e+06	728838	3.0094e+06	2.49701e+06	5.08885e+06
DnaJ homolog subfamily A member 1 OS=Homo sapiens OX=9606 GN=DNAJA1 PE=1 SV=2	23	8	51	44.8	DNAJA1	1.07554e+07	1.16737e+07	2.73546e+06	1.08127e+07	1.14061e+07	1.36963e+07
Elongation factor 2 OS=Homo sapiens OX=9606 GN=EEF2 PE=1 SV=4	22	17	51	95.3	EEF2	1.21878e+07	5.87532e+06	2.03938e+06	6.33885e+06	5.08952e+06	7.00119e+06
Endoplasmin OS=Homo sapiens OX=9606 GN=HSP90B1 PE=1 SV=1	20	15	51	92.4	HSP90B1	2.40516e+06	1.49257e+06	1.03794e+06	2.54756e+06	2.04404e+06	2.65088e+06
Inosine-5'-monophosphate dehydrogenase 2 (Fragment) OS=Homo sapiens OX=9606 GN=IMPDH2 PE=1 SV=1	29	13	50	51		2.93557e+06	1.72346e+06	702903	4.91072e+06	4.13229e+06	4.63044e+06
LIM domain only protein 7 OS=Homo sapiens OX=9606 GN=LMO7 PE=1 SV=3	12	14	50	192.6	LMO7	1.86545e+06	1.75146e+06	821861	2.41774e+06	2.2219e+06	2.23536e+06
Microtubule-associated protein 1B OS=Homo sapiens OX=9606 GN=MAP1B PE=1 SV=2	17	27	50	270.5	MAP1B	8.57198e+06	952633	147988	850502	641969	593215
Protein-lysine 6-oxidase OS=Homo sapiens OX=9606 GN=LOX PE=1 SV=2	25	9	50	46.9	LOX	8.20873e+06	1.02278e+07	2.70967e+06	4.27274e+06	3.66006e+06	5.26533e+06
RalBP1-associated Eps domain-containing protein 1 OS=Homo sapiens OX=9606 GN=REPS1 PE=1 SV=3	23	13	50	86.6	REPS1	51645.4	11411.4	8918.53	4.84464e+06	3.72352e+06	4.66699e+06
RNA helicase OS=Homo sapiens OX=9606 GN=EIF4A2 PE=1 SV=1	22	6	49	41.3		318548	134608	24761.7	135739	127094	277118
40S ribosomal protein S4, X isoform OS=Homo sapiens OX=9606 GN=RPS4X PE=1 SV=2	33	8	48	29.6	RPS4X	4.11126e+06	2.67171e+06	444766	5.52404e+06	4.84751e+06	8.04125e+06
ADP/ATP translocase 3 OS=Homo sapiens OX=9606 GN=SLC25A6 PE=1 SV=4	26	8	48	32.8	SLC25A6	3.01614e+06	1.54767e+06	288309	1.47595e+06	2.75591e+06	5.02936e+06
Annexin A2 OS=Homo sapiens OX=9606 GN=ANXA2 PE=1 SV=2	44	13	48	38.6	ANXA2	9.13895e+06	5.61539e+06	3.17613e+06	1.1128e+07	8.4962e+06	8.9145e+06
Helicase-like transcription factor OS=Homo sapiens OX=9606 GN=HLTF PE=1 SV=2	18	15	48	113.9	HLTF	2.25587e+06	2.35912e+06	761321	2.7196e+06	2.51433e+06	3.42989e+06
Leucine-rich PPR motif-containing protein, mitochondrial OS=Homo sapiens OX=9606 GN=LRPPRC PE=1 SV=3	14	18	48	157.8	LRPPRC	2.08224e+06	1.07868e+06	435300	1.97923e+06	1.63357e+06	1.61753e+06
Sidoreflexin OS=Homo sapiens OX=9606 GN=SFXN3 PE=1 SV=1	38	10	48	36	SFXN3	1.61136e+06	1.26448e+06	573835	1.98451e+06	1.78354e+06	2.03262e+06
Tricarboxylate transport protein, mitochondrial OS=Homo sapiens OX=9606 GN=SLC25A1 PE=1 SV=2	21	7	48	34	SLC25A1	2.78799e+06	3.05755e+06	544926	4.96973e+06	3.85845e+06	6.28297e+06
Ubiquitin-associated protein 2-like OS=Homo sapiens OX=9606 GN=UBAP2L PE=1 SV=2	19	11	48	113.6	UBAP2L	2.96586e+06	1.38244e+06	761396	2.04887e+06	1.93842e+06	1.98599e+06
14-3-3 protein epsilon OS=Homo sapiens OX=9606 GN=YWHAE PE=1 SV=1	31	7	47	29.2	YWHAE	1.03963e+06	543748	336920	1.24408e+06	984141	1.02182e+06
DNA-directed RNA polymerase subunit beta OS=Homo sapiens OX=9606 GN=POLR2B PE=1 SV=2	14	14	47	133	POLR2B	2.71361e+06	1.7292e+06	628252	2.40909e+06	2.32649e+06	2.33253e+06
DnaJ homolog subfamily C member 13 OS=Homo sapiens OX=9606 GN=DNAJC13 PE=1 SV=5	9	17	47	254.3	DNAJC13	1.06058e+06	716196	258512	1.18336e+06	1.12372e+06	1.63511e+06
Eukaryotic translation initiation factor 3 subunit A OS=Homo sapiens OX=9606 GN=EIF3A PE=1 SV=1	7	10	47	166.5	EIF3A	2.12233e+06	1.41471e+06	493016	4.32018e+06	3.53696e+06	3.70743e+06
14-3-3 protein zeta/delta OS=Homo sapiens OX=9606 GN=YWHAZ PE=1 SV=1	47	11	46	27.7	YWHAZ	6.70433e+06	5.84445e+06	1.52955e+06	9.44813e+06	6.54664e+06	7.22317e+06
60S ribosomal protein L7a OS=Homo sapiens OX=9606 GN=RPL7A PE=1 SV=2	30	10	46	30	RPL7A	5.33477e+06	2.91309e+06	1.14773e+06	1.28947e+07	9.58332e+06	1.21221e+07
Heterogeneous nuclear ribonucleoproteins C1/C2 OS=Homo sapiens OX=9606 GN=HNRNPC PE=1 SV=1	19	6	46	32	HNRNPC	3.87608e+06	1.88535e+06	885482	1.45502e+06	1.77271e+06	1.82116e+06
Histone H2B type 2-E OS=Homo sapiens OX=9606 GN=H2BC21 PE=1 SV=3	47	6	46	13.9	HIST2H2BE	3.62429e+07	1.11125e+07	5.98094e+06	2.08846e+07	1.83867e+07	2.26308e+07
Histone H2B type 2-F OS=Homo sapiens OX=9606 GN=H2BC18 PE=1 SV=3	47	6	46	13.9	HIST2H2BF	803120		31402	535997	459857	783714
Afadin OS=Homo sapiens OX=9606 GN=AFDN PE=1 SV=2	10	13	45	201.7	MLLT4; AFDN	1.20253e+06	763191	339300	1.25648e+06	1.07329e+06	1.14186e+06
Elongation factor 1-delta OS=Homo sapiens OX=9606 GN=EEF1D PE=1 SV=5	42	9	45	31.1	EEF1D	4.3815e+06	2.13556e+06	733286	2.67136e+06	2.38029e+06	3.14205e+06
Histone H1.4 OS=Homo sapiens OX=9606 GN=H1-4 PE=1 SV=2	36	11	45	21.9	HIST1H1E	8.005e+06		47766.7	55229.5	74082.4	83940.5
[3-methyl-2-oxobutanoate dehydrogenase [lipoamide]] kinase, mitochondrial OS=Homo sapiens OX=9606 GN=BCKDK PE=1 SV=2	14	5	44	46.3	BCKDK	5.63398e+06	5.2967e+06	1.85054e+06	4.07257e+06	4.28921e+06	6.53956e+06
ATP-dependent RNA helicase A OS=Homo sapiens OX=9606 GN=DHX9 PE=1 SV=4	14	17	44	140.9	DHX9	5.46007e+06	3.32479e+06	1.70777e+06	3.97362e+06	3.57157e+06	3.98816e+06
Mannose-1-phosphate guanyltransferase alpha OS=Homo sapiens OX=9606 GN=GMPPA PE=1 SV=1	20	7	44	46.3	GMPPA	6.00394e+06	5.91682e+06	2.89385e+06	7.17768e+06	7.24882e+06	6.88379e+06
Nucleolin OS=Homo sapiens OX=9606 GN=NCL PE=1 SV=3	16	11	44	76.6	NCL	7.09845e+06	4.39908e+06	1.71639e+06	1.67558e+07	1.18342e+07	1.07938e+07
Protein NipSnap homolog 2 OS=Homo sapiens OX=9606 GN=NIPSNAP2 PE=1 SV=1	23	8	44	33.7	GBAS; NIPSNAP2	9.89648e+06	9.02246e+06	3.4672e+06	1.28215e+07	1.41631e+07	1.54494e+07
Polypyrimidine tract-binding protein 1 OS=Homo sapiens OX=9606 GN=PTBP1 PE=1 SV=1	32	12	43	57.2	PTBP1	3.89396e+06	2.18933e+06	745534	3.05557e+06	2.74784e+06	5.00858e+06
26S proteasome non-ATPase regulatory subunit 2 OS=Homo sapiens OX=9606 GN=PSMD2 PE=1 SV=3	14	10	42	100.1	PSMD2	3.1319e+06	2.29272e+06	894335	2.65622e+06	2.4202e+06	2.84199e+06
Cdc42 effector protein 1 OS=Homo sapiens OX=9606 GN=CDC42EP1 PE=1 SV=1	20	7	42	40.3	CDC42EP1	1.94618e+06	2.49806e+06	1.04253e+06	4.24682e+06	3.01356e+06	3.9388e+06
Citron Rho-interacting kinase OS=Homo sapiens OX=9606 GN=CIT PE=1 SV=2	6	11	42	231.3	CIT	1.3206e+06	906874	433082	1.37677e+06	992612	931610
Histone H1.3 OS=Homo sapiens OX=9606 GN=H1-3 PE=1 SV=2	37	10	42	22.3	HIST1H1D	1.23245e+06
Interleukin enhancer-binding factor 3 OS=Homo sapiens OX=9606 GN=ILF3 PE=1 SV=3	12	9	41	95.3	ILF3	1.76474e+06	1.13925e+06	282628	2.14889e+06	1.53108e+06	2.2579e+06
RNA transcription, translation and transport factor protein OS=Homo sapiens OX=9606 GN=RTRAF PE=1 SV=1	32	7	41	28.1	C14orf166; RTRAF	3.30246e+06	2.59112e+06	768928	3.04727e+06	3.1556e+06	3.50973e+06
40S ribosomal protein S11 OS=Homo sapiens OX=9606 GN=RPS11 PE=1 SV=3	37	9	40	18.4	RPS11	5.5353e+06	4.27469e+06	1.35409e+06	9.40036e+06	6.93059e+06	7.6931e+06
Adaptin ear-binding coat-associated protein 2 OS=Homo sapiens OX=9606 GN=NECAP2 PE=1 SV=1	47	10	40	28.3	NECAP2	131528	6535.24	11018.1	1.88251e+07	1.60751e+07	2.36919e+07
Ankyrin repeat and KH domain-containing protein 1 OS=Homo sapiens OX=9606 GN=ANKHD1 PE=1 SV=1	10	14	40	269.3	ANKHD1; ANKHD1-EIF4EBP3	707750	349380	105151	681106	582352	665757
ATP synthase subunit O, mitochondrial OS=Homo sapiens OX=9606 GN=ATP5PO PE=1 SV=1	39	7	40	23.3	ATP5O	7.03578e+06	7.42518e+06	2.56731e+06	7.91973e+06	6.35582e+06	8.02695e+06
Integrin beta-1 OS=Homo sapiens OX=9606 GN=ITGB1 PE=1 SV=2	14	10	40	88.4	ITGB1	5.2737e+06	1.91892e+06	1.23244e+06	4.00223e+06	2.88997e+06	4.23703e+06
Nuclear mitotic apparatus protein 1 OS=Homo sapiens OX=9606 GN=NUMA1 PE=1 SV=2	8	12	40	238.1	NUMA1	651472	295586	148200	630832	521296	471952
Peroxidasin homolog OS=Homo sapiens OX=9606 GN=PXDN PE=1 SV=2	9	11	40	165.2	PXDN	3.79959e+06	2.64347e+06	941136	3.43755e+06	2.81208e+06	2.77146e+06
Rapamycin-insensitive companion of mTOR OS=Homo sapiens OX=9606 GN=RICTOR PE=1 SV=1	10	15	40	192.1	RICTOR	3.91691e+06	5.42396e+06	1.0291e+06	6.7921e+06	5.08661e+06	5.77054e+06
Receptor of activated protein C kinase 1 OS=Homo sapiens OX=9606 GN=RACK1 PE=1 SV=3	28	8	40	35.1	GNB2L1; RACK1	2.47983e+06	1.07885e+06	211362	3.35353e+06	3.33453e+06	4.54748e+06
Serine/threonine-protein phosphatase PP1-alpha catalytic subunit OS=Homo sapiens OX=9606 GN=PPP1CA PE=1 SV=1	16	5	40	37.5	PPP1CA	3.72153e+06	2.22911e+06	887892	2.33074e+06	2.523e+06	2.02887e+06
Staphylococcal nuclease domain-containing protein 1 OS=Homo sapiens OX=9606 GN=SND1 PE=1 SV=1	19	13	40	101.9	SND1	3.19357e+06	854742	467463	1.47024e+06	1.33552e+06	1.6525e+06
Stress-70 protein, mitochondrial OS=Homo sapiens OX=9606 GN=HSPA9 PE=1 SV=2	28	15	40	73.6	HSPA9	4.11581e+06	354636	297261	948084	723799	887533
40S ribosomal protein S13 OS=Homo sapiens OX=9606 GN=RPS13 PE=1 SV=2	38	6	39	17.2	RPS13	5.49777e+06	5.31786e+06	729918	8.24019e+06	7.08838e+06	1.01544e+07
Alpha-crystallin B chain OS=Homo sapiens OX=9606 GN=CRYAB PE=1 SV=2	55	10	39	20.1	CRYAB	4.50936e+06	7.9628e+06	916641	6.4868e+06	4.81794e+06	6.40488e+06
Ribonuclease inhibitor OS=Homo sapiens OX=9606 GN=RNH1 PE=1 SV=2	18	7	39	49.9	RNH1	3.81601e+06	1.49169e+06	933030	3.62015e+06	2.91848e+06	3.32197e+06
Very long-chain specific acyl-CoA dehydrogenase, mitochondrial OS=Homo sapiens OX=9606 GN=ACADVL PE=1 SV=1	21	12	39	70.3	ACADVL	2.1269e+06	1.57339e+06	875539	1.923e+06	1.62886e+06	1.73469e+06
40S ribosomal protein S19 OS=Homo sapiens OX=9606 GN=RPS19 PE=1 SV=2	44	9	38	16.1	RPS19	3.36591e+06	3.49494e+06	925903	1.37248e+07	8.74287e+06	7.95918e+06
Activating molecule in BECN1-regulated autophagy protein 1 OS=Homo sapiens OX=9606 GN=AMBRA1 PE=1 SV=2	13	11	38	142.4	AMBRA1	796714	554900	240653	562051	683861	810239
Beta-2-syntrophin OS=Homo sapiens OX=9606 GN=SNTB2 PE=1 SV=1	25	12	38	57.9	SNTB2	1.5401e+06	1.41288e+06	615035	2.69093e+06	2.2746e+06	3.07516e+06
Double-stranded RNA-binding protein Staufen homolog 1 OS=Homo sapiens OX=9606 GN=STAU1 PE=1 SV=2	20	10	38	63.1	STAU1	1.37151e+06	972154	455362	2.45792e+06	2.09682e+06	2.01026e+06
Replication factor C subunit 4 OS=Homo sapiens OX=9606 GN=RFC4 PE=1 SV=2	31	9	38	39.7	RFC4	1.83534e+06	1.33421e+06	522292	1.79498e+06	1.56248e+06	1.71376e+06
Serpin H1 OS=Homo sapiens OX=9606 GN=SERPINH1 PE=1 SV=2	24	7	38	46.4	SERPINH1	4.10678e+06	3.17637e+06	1.19339e+06	3.56785e+06	4.20636e+06	4.90011e+06
UDP-glucose 6-dehydrogenase OS=Homo sapiens OX=9606 GN=UGDH PE=1 SV=1	23	10	38	55	UGDH	2.33145e+06	2.01523e+06	975870	2.99959e+06	2.45723e+06	2.37617e+06
40S ribosomal protein S15a OS=Homo sapiens OX=9606 GN=RPS15A PE=1 SV=1	34	4	37	11.5		3.76963e+06	5.39884e+06	1.05379e+06	9.80699e+06	7.24805e+06	8.17902e+06
Alpha-actinin cytoskeletal isoform OS=Homo sapiens OX=9606 GN=ACTN1 PE=1 SV=1	14	9	37	94.8		98133	44108.6	46123.8	240447	197602	138507
Heterogeneous nuclear ribonucleoprotein Q OS=Homo sapiens OX=9606 GN=SYNCRIP PE=1 SV=2	11	7	37	69.6	SYNCRIP	2.07761e+06	1.16516e+06	456372	2.47579e+06	2.18392e+06	2.50123e+06
Heterogeneous nuclear ribonucleoproteins A2/B1 OS=Homo sapiens OX=9606 GN=HNRNPA2B1 PE=1 SV=2	32	9	37	37.4	HNRNPA2B1	4.58593e+06	1.23733e+06	525719	2.58762e+06	2.62398e+06	2.75732e+06
Interleukin enhancer-binding factor 2 OS=Homo sapiens OX=9606 GN=ILF2 PE=1 SV=1	27	8	37	38.9	ILF2	1.77664e+06	1.32919e+06	169445	1.42054e+06	1.69266e+06	2.29169e+06
PDZ and LIM domain protein 5 OS=Homo sapiens OX=9606 GN=PDLIM5 PE=1 SV=5	31	13	37	63.9	PDLIM5	2.42816e+06	1.4848e+06	612071	2.26451e+06	1.94898e+06	2.49127e+06
Protein PRRC2C OS=Homo sapiens OX=9606 GN=PRRC2C PE=1 SV=1	7	14	37	308.6	PRRC2C	635816	583574	158407	688292	482684	432524
Serine hydroxymethyltransferase, mitochondrial OS=Homo sapiens OX=9606 GN=SHMT2 PE=1 SV=3	23	10	37	56	SHMT2	2.38632e+06	1.94275e+06	879168	2.1659e+06	2.25582e+06	2.86247e+06
T-complex protein 1 subunit beta OS=Homo sapiens OX=9606 GN=CCT2 PE=1 SV=4	28	11	37	57.5	CCT2	3.05187e+06	669177	435116	988142	840825	906711
Zinc finger CCCH-type antiviral protein 1 OS=Homo sapiens OX=9606 GN=ZC3HAV1 PE=1 SV=3	17	10	37	101.4	ZC3HAV1	276405	50606	29076.6	194483	229389	82762
14-3-3 protein theta OS=Homo sapiens OX=9606 GN=YWHAQ PE=1 SV=1	36	9	36	27.7	YWHAQ	1.01144e+06	522070	265648	1.18888e+06	769036	442543
Chromosome transmission fidelity protein 18 homolog OS=Homo sapiens OX=9606 GN=CHTF18 PE=1 SV=1	17	12	36	107.3	CHTF18	1.67652e+06	1.13961e+06	548181	1.49949e+06	1.31053e+06	1.56084e+06
Cytochrome b-c1 complex subunit 2, mitochondrial OS=Homo sapiens OX=9606 GN=UQCRC2 PE=1 SV=3	27	9	36	48.4	UQCRC2	1.90704e+06	1.14318e+06	626665	2.54664e+06	2.06706e+06	2.10929e+06
DnaJ homolog subfamily B member 6 OS=Homo sapiens OX=9606 GN=DNAJB6 PE=1 SV=1	27	7	36	36.6	DNAJB6	2.11776e+06	2.05369e+06	340654	2.2763e+06	2.27286e+06	2.34783e+06
Eukaryotic translation initiation factor 2 subunit 3 OS=Homo sapiens OX=9606 GN=EIF2S3 PE=1 SV=3	23	8	36	51.1	EIF2S3	3.04374e+06	694104	491698	2.04019e+06	1.65563e+06	1.98224e+06
Histone H2A type 2-C OS=Homo sapiens OX=9606 GN=H2AC20 PE=1 SV=4	58	5	36	14	HIST2H2AC	1.42611e+06	296232	41318.2	306120	363046	252174
Host cell factor 1 OS=Homo sapiens OX=9606 GN=HCFC1 PE=1 SV=2	16	17	36	208.6	HCFC1	517360	18044.3	22135.3	54010.9	44276.9	30279.1
Importin subunit alpha-1 OS=Homo sapiens OX=9606 GN=KPNA2 PE=1 SV=1	25	9	36	57.8	KPNA2	2.67424e+06	1.24949e+06	607919	2.52551e+06	1.74958e+06	2.5555e+06
Splicing factor 3B subunit 3 OS=Homo sapiens OX=9606 GN=SF3B3 PE=1 SV=4	12	12	36	135.5	SF3B3	1.3605e+06	422354	183153	1.05248e+06	1.00082e+06	980352
40S ribosomal protein S25 OS=Homo sapiens OX=9606 GN=RPS25 PE=1 SV=1	30	4	35	13.7	RPS25	6.21149e+06	3.75112e+06	1.41701e+06	1.73543e+07	1.25955e+07	1.35977e+07
Catenin beta-1 (Fragment) OS=Homo sapiens OX=9606 GN=CTNNB1 PE=1 SV=1	14	10	35	85.2		1.44445e+06	1.34415e+06	898288	2.20541e+06	1.99554e+06	2.55431e+06
Host cell factor 1 OS=Homo sapiens OX=9606 GN=HCFC1 PE=1 SV=2	15	17	35	213.3	HCFC1	5.28929e+06	310425	142001	512647	533096	693309
Isoleucine--tRNA ligase, cytoplasmic OS=Homo sapiens OX=9606 GN=IARS1 PE=1 SV=2	12	13	35	144.4	IARS	3.57133e+06	930176	302347	1.48664e+06	1.3854e+06	1.82705e+06
Lamina-associated polypeptide 2, isoform alpha OS=Homo sapiens OX=9606 GN=TMPO PE=1 SV=2	22	10	35	75.4	TMPO	2.43277e+06	1.42933e+06	564852	1.60093e+06	1.18942e+06	1.15611e+06
La-related protein 4B OS=Homo sapiens OX=9606 GN=LARP4B PE=1 SV=3	13	9	35	80.5	LARP4B	2.15938e+06	2.55816e+06	725748	2.71275e+06	2.34442e+06	2.31183e+06
Lysyl oxidase homolog 1 OS=Homo sapiens OX=9606 GN=LOXL1 PE=1 SV=2	17	7	35	63.1	LOXL1	5.62024e+06	5.9475e+06	2.73736e+06	4.05207e+06	3.83969e+06	4.65379e+06
Peroxisomal 2,4-dienoyl-CoA reductase OS=Homo sapiens OX=9606 GN=DECR2 PE=1 SV=1	37	11	35	30.8	DECR2	1.60287e+06	1.58171e+06	837749	2.36833e+06	1.9135e+06	2.55427e+06
Transforming growth factor-beta-induced protein ig-h3 OS=Homo sapiens OX=9606 GN=TGFBI PE=1 SV=1	13	8	35	74.6	TGFBI	2.20525e+06	2.26587e+06	677985	3.18531e+06	2.63797e+06	3.51169e+06
60S acidic ribosomal protein P2 OS=Homo sapiens OX=9606 GN=RPLP2 PE=1 SV=1	57	4	34	11.7	RPLP2	1.94129e+06	2.21724e+06	205491	3.87659e+06	3.14066e+06	2.48271e+06
ATP-citrate synthase OS=Homo sapiens OX=9606 GN=ACLY PE=1 SV=3	14	13	34	120.8	ACLY	3.01345e+06	632305	315713	1.22287e+06	1.03742e+06	1.01408e+06
Enoyl-CoA hydratase OS=Homo sapiens OX=9606 GN=HADHA PE=1 SV=2	18	11	34	86.3		1.85113e+06	1.12037e+06	552568	1.83921e+06	1.33197e+06	1.44204e+06
Heterogeneous nuclear ribonucleoprotein F OS=Homo sapiens OX=9606 GN=HNRNPF PE=1 SV=3	26	8	34	45.6	HNRNPF	2.33553e+06	639609	480941	1.33936e+06	1.06897e+06	1.03523e+06
Histone H2A type 3 OS=Homo sapiens OX=9606 GN=H2AW PE=1 SV=3	58	5	34	14.1	HIST3H2A	3.99308e+07	3.21159e+07	7.15718e+06	3.74326e+07	3.71689e+07	6.65798e+07
Mannosyl-oligosaccharide glucosidase OS=Homo sapiens OX=9606 GN=MOGS PE=1 SV=5	14	11	34	91.9	MOGS	886098	817425	326259	1.5886e+06	1.32694e+06	2.30901e+06
Peroxisomal multifunctional enzyme type 2 OS=Homo sapiens OX=9606 GN=HSD17B4 PE=1 SV=3	24	12	34	79.6	HSD17B4	1.27784e+06	1.10543e+06	413421	1.10491e+06	981464	852106
SUN domain-containing protein 2 OS=Homo sapiens OX=9606 GN=SUN2 PE=1 SV=3	16	8	34	80.3	SUN2	875581	999299	277357	800079	617491	836585
T-complex protein 1 subunit theta OS=Homo sapiens OX=9606 GN=CCT8 PE=1 SV=4	27	14	34	59.6	CCT8	6.38635e+06	1.1294e+06	626219	1.89173e+06	1.33249e+06	1.51291e+06
Tyrosine-protein phosphatase non-receptor type 14 OS=Homo sapiens OX=9606 GN=PTPN14 PE=1 SV=2	12	12	34	135.2	PTPN14	1.7971e+06	1.18476e+06	404591	1.52859e+06	1.15272e+06	1.68594e+06
2',3'-cyclic-nucleotide 3'-phosphodiesterase OS=Homo sapiens OX=9606 GN=CNP PE=1 SV=2	23	11	33	47.5	CNP	1.28563e+06	1.32564e+06	344330	1.60327e+06	1.09813e+06	1.77236e+06
60S ribosomal protein L18 (Fragment) OS=Homo sapiens OX=9606 GN=RPL18 PE=1 SV=1	33	6	33	19		3.02228e+06	1.09606e+06	251935	2.82968e+06	2.83041e+06	3.6428e+06
Centrosomal protein of 170 kDa OS=Homo sapiens OX=9606 GN=CEP170 PE=1 SV=1	8	11	33	175.2	CEP170	1.32042e+06	1.25936e+06	521696	1.20188e+06	1.02114e+06	2.2468e+06
Elongation factor Tu, mitochondrial OS=Homo sapiens OX=9606 GN=TUFM PE=1 SV=2	24	9	33	49.5	TUFM	4.3821e+06	1.05139e+06	648189	2.70331e+06	2.20402e+06	2.16351e+06
Heterogeneous nuclear ribonucleoprotein H2 OS=Homo sapiens OX=9606 GN=HNRNPH2 PE=1 SV=1	19	6	33	49.2	HNRNPH2	171328	68611.2	23723.7	162848	236420	274180
Nicotinamide phosphoribosyltransferase OS=Homo sapiens OX=9606 GN=NAMPT PE=1 SV=1	24	8	33	55.5	NAMPT	2.7386e+06	2.15278e+06	643102	3.37791e+06	3.16415e+06	5.65554e+06
Protein PRRC2B (Fragment) OS=Homo sapiens OX=9606 GN=PRRC2B PE=1 SV=1	19	7	33	63.3		24578	13853.2	13572.8	50374.7	61672.7	32855.7
40S ribosomal protein S8 OS=Homo sapiens OX=9606 GN=RPS8 PE=1 SV=2	34	6	32	24.2	RPS8	4.18171e+06	490786	117865	3.07503e+06	2.43488e+06	2.30745e+06
Caprin-1 OS=Homo sapiens OX=9606 GN=CAPRIN1 PE=1 SV=2	13	6	32	78.3	CAPRIN1	2.08419e+06	1.19613e+06	618120	2.78164e+06	2.05157e+06	1.48114e+06
Cytoplasmic dynein 1 heavy chain 1 OS=Homo sapiens OX=9606 GN=DYNC1H1 PE=1 SV=5	3	13	32	532.1	DYNC1H1	1.24036e+06	1.47147e+06	238238	990939	688293	949684
Echinoderm microtubule-associated protein-like 3 OS=Homo sapiens OX=9606 GN=EML3 PE=1 SV=1	12	9	32	95.1	EML3	1.79493e+06	1.02313e+06	650167	1.68163e+06	1.32572e+06	1.37333e+06
eIF-2-alpha kinase activator GCN1 OS=Homo sapiens OX=9606 GN=GCN1 PE=1 SV=6	7	16	32	292.6	GCN1L1; GCN1	1.46526e+06	387425	313613	738148	464278	747851
Palladin OS=Homo sapiens OX=9606 GN=PALLD PE=1 SV=3	10	11	32	150.5	PALLD	1.10179e+06	932352	537795	1.26521e+06	1.11751e+06	937135
Unconventional myosin-Ic OS=Homo sapiens OX=9606 GN=MYO1C PE=1 SV=4	14	11	32	121.6	MYO1C	801362	665003	365339	2.32593e+06	2.04213e+06	2.06696e+06
Zinc finger CCCH-type antiviral protein 1 OS=Homo sapiens OX=9606 GN=ZC3HAV1 PE=1 SV=1	16	10	32	114	ZC3HAV1	1.72404e+06	567913	372035	1.43727e+06	1.13634e+06	904180
60S ribosomal protein L10a OS=Homo sapiens OX=9606 GN=RPL10A PE=1 SV=2	30	8	31	24.8	RPL10A	6.06531e+06	4.16036e+06	1.64438e+06	1.12433e+07	8.95645e+06	1.10576e+07
60S ribosomal protein L13 OS=Homo sapiens OX=9606 GN=RPL13 PE=1 SV=4	30	7	31	24.2	RPL13	3.49768e+06	2.48959e+06	526789	6.23368e+06	4.5904e+06	6.10528e+06
Adaptin ear-binding coat-associated protein 1 OS=Homo sapiens OX=9606 GN=NECAP1 PE=1 SV=1	26	5	31	28		89512.1	82345.9	32120.1	9.46069e+06	6.73894e+06	1.0051e+07
DnaJ homolog subfamily B member 6 OS=Homo sapiens OX=9606 GN=DNAJB6 PE=1 SV=2	23	6	31	36.1	DNAJB6	475593	375102	17668.4	156577	138416	520649
Galectin-1 OS=Homo sapiens OX=9606 GN=LGALS1 PE=1 SV=2	58	6	31	14.7	LGALS1	4.5824e+06	3.93299e+06	595890	2.57694e+06	2.33806e+06	3.75548e+06
Glutamine--tRNA ligase OS=Homo sapiens OX=9606 GN=QARS1 PE=1 SV=1	15	10	31	87.7	QARS	1.05091e+06	707279	365029	1.62612e+06	1.18145e+06	1.46338e+06
Perilipin-3 OS=Homo sapiens OX=9606 GN=PLIN3 PE=1 SV=3	26	8	31	47	PLIN3	586554	344062	167922	573150	440780	568287
Serine/threonine-protein kinase mTOR OS=Homo sapiens OX=9606 GN=MTOR PE=1 SV=1	6	11	31	288.7	MTOR	580531	489594	218391	667879	514021	530282
40S ribosomal protein S16 OS=Homo sapiens OX=9606 GN=RPS16 PE=1 SV=1	48	7	30	14.4	RPS16	3.31056e+06	2.43638e+06	159826	3.68965e+06	3.6491e+06	6.84456e+06
60S ribosomal protein L23a (Fragment) OS=Homo sapiens OX=9606 GN=RPL23A PE=1 SV=1	35	7	30	17.8		2.91027e+06	897991	408294	6.07613e+06	4.35771e+06	3.90951e+06
Alpha- and gamma-adaptin-binding protein p34 OS=Homo sapiens OX=9606 GN=AAGAB PE=1 SV=1	19	5	30	34.6	AAGAB	8739.31			3.28018e+06	4.40789e+06	6.59459e+06
Arf-GAP with Rho-GAP domain, ANK repeat and PH domain-containing protein 3 OS=Homo sapiens OX=9606 GN=ARAP3 PE=1 SV=1	9	11	30	169.7	ARAP3	1.1035e+06	886012	335589	1.29362e+06	1.13532e+06	1.16705e+06
Cytoplasmic polyadenylation element-binding protein 4 OS=Homo sapiens OX=9606 GN=CPEB4 PE=1 SV=1	16	9	30	80.1	CPEB4	508473	284381	94741.6	480736	455368	656928
Dedicator of cytokinesis protein 7 OS=Homo sapiens OX=9606 GN=DOCK7 PE=1 SV=4	7	13	30	242.4	DOCK7	1.8099e+06	1.79222e+06	480557	3.14972e+06	2.63211e+06	2.86902e+06
Far upstream element-binding protein 1 OS=Homo sapiens OX=9606 GN=FUBP1 PE=1 SV=3	15	8	30	67.5	FUBP1	1.61673e+06	465028	376275	854666	489020	513486
Formyltetrahydrofolate synthetase OS=Homo sapiens OX=9606 GN=MTHFD1L PE=1 SV=1	16	12	30	99.2	MTHFD1L	1.53583e+06	977476	341405	1.71482e+06	1.52976e+06	1.25314e+06
L-lactate dehydrogenase A chain OS=Homo sapiens OX=9606 GN=LDHA PE=1 SV=2	23	8	30	36.7	LDHA	4.40125e+06	1.92652e+06	1.19552e+06	2.20231e+06	1.24844e+06	1.80696e+06
Nicalin OS=Homo sapiens OX=9606 GN=NCLN PE=1 SV=2	15	6	30	62.9	NCLN	667568	452309	304200	919486	693390	482310
Non-POU domain-containing octamer-binding protein OS=Homo sapiens OX=9606 GN=NONO PE=1 SV=4	18	7	30	54.2	NONO	2.77017e+06	2.09881e+06	400578	1.86779e+06	1.67859e+06	2.7238e+06
Serine protease HTRA2, mitochondrial OS=Homo sapiens OX=9606 GN=HTRA2 PE=1 SV=2	15	7	30	48.8	HTRA2	2.69606e+06	2.82035e+06	503413	3.34409e+06	3.65927e+06	4.49444e+06
SH3 domain-binding protein 4 OS=Homo sapiens OX=9606 GN=SH3BP4 PE=1 SV=1	11	9	30	107.4	SH3BP4	1.30348e+06	1.04518e+06	443728	771909	530022	587890
Thrombospondin-1 OS=Homo sapiens OX=9606 GN=THBS1 PE=1 SV=2	11	11	30	129.3	THBS1	1.62189e+06	1.22833e+06	525101	1.21263e+06	1.13161e+06	1.16803e+06
14-3-3 protein beta/alpha OS=Homo sapiens OX=9606 GN=YWHAB PE=1 SV=3	28	7	29	28.1	YWHAB	329770	85646.9	18298.6	191454	122543	66859.5
40S ribosomal protein S5 (Fragment) OS=Homo sapiens OX=9606 GN=RPS5 PE=1 SV=1	50	9	29	22.4		2.58839e+06	2.25813e+06	1.09637e+06	8.85108e+06	6.08972e+06	6.16924e+06
Acyl-coenzyme A thioesterase 9, mitochondrial OS=Homo sapiens OX=9606 GN=ACOT9 PE=1 SV=2	17	7	29	49.9	ACOT9	2.097e+06	2.46184e+06	696162	4.03274e+06	2.98295e+06	3.70081e+06
D-3-phosphoglycerate dehydrogenase OS=Homo sapiens OX=9606 GN=PHGDH PE=1 SV=4	19	8	29	56.6	PHGDH	2.64682e+06	1.25234e+06	1.07922e+06	2.13311e+06	1.61024e+06	1.5304e+06
DNA polymerase OS=Homo sapiens OX=9606 GN=POLD1 PE=1 SV=1	11	11	29	126.3	POLD1	1.43995e+06	1.79927e+06	994694	1.76801e+06	1.69342e+06	1.54016e+06
DnaJ homolog subfamily B member 11 OS=Homo sapiens OX=9606 GN=DNAJB11 PE=1 SV=1	20	7	29	40.5	DNAJB11	2.69132e+06	3.06903e+06	1.60427e+06	2.85359e+06	2.70092e+06	2.24785e+06
Fructose-bisphosphate aldolase A OS=Homo sapiens OX=9606 GN=ALDOA PE=1 SV=2	41	12	29	39.4	ALDOA	6.55161e+06	847387	855839	1.60052e+06	1.01704e+06	1.12811e+06
GRB10-interacting GYF protein 2 OS=Homo sapiens OX=9606 GN=GIGYF2 PE=1 SV=1	8	7	29	152.4		1.53782e+06	1.26217e+06	814343	1.99875e+06	1.70253e+06	1.6557e+06
Leucyl-tRNA synthetase OS=Homo sapiens OX=9606 GN=LARS1 PE=1 SV=1	11	10	29	129.1		1.55799e+06	361820	104168	649434	394098	491286
Peroxiredoxin-2 OS=Homo sapiens OX=9606 GN=PRDX2 PE=1 SV=5	33	8	29	21.9	PRDX2	3.56655e+06	268245	39617.9	331060	277480	284902
Protein LYRIC OS=Homo sapiens OX=9606 GN=MTDH PE=1 SV=2	16	7	29	63.8	MTDH	391163	128241	133749	870972	655581	508887
Protein scribble homolog OS=Homo sapiens OX=9606 GN=SCRIB PE=1 SV=1	7	10	29	177.7		538215	398223	199299	550719	465432	665793
Ran GTPase-activating protein 1 OS=Homo sapiens OX=9606 GN=RANGAP1 PE=1 SV=1	16	8	29	63.5	RANGAP1	1.35832e+06	674231	363753	1.19942e+06	976849	963354
Rho GTPase-activating protein SYDE1 OS=Homo sapiens OX=9606 GN=SYDE1 PE=1 SV=1	13	7	29	79.7	SYDE1	673791	612680	323620	751223	651005	727872
T-complex protein 1 subunit alpha OS=Homo sapiens OX=9606 GN=TCP1 PE=1 SV=1	22	9	29	60.3	TCP1	3.89223e+06	866183	526004	1.60565e+06	1.27182e+06	1.50798e+06
116 kDa U5 small nuclear ribonucleoprotein component OS=Homo sapiens OX=9606 GN=EFTUD2 PE=1 SV=1	12	9	28	109.4	EFTUD2	1.98841e+06	505321	234855	1.06693e+06	869566	1.06977e+06
14-3-3 protein gamma OS=Homo sapiens OX=9606 GN=YWHAG PE=1 SV=2	23	6	28	28.3	YWHAG	601354	71690.8	82918	375761	331918	93524
40S ribosomal protein S20 OS=Homo sapiens OX=9606 GN=RPS20 PE=1 SV=1	32	5	28	13.4	RPS20	7.20301e+06	5.23526e+06	869653	1.10217e+07	9.00417e+06	1.42696e+07
Arf-GAP with Rho-GAP domain, ANK repeat and PH domain-containing protein 3 OS=Homo sapiens OX=9606 GN=ARAP3 PE=1 SV=1	10	10	28	151.1	ARAP3	35349.5	21096.7	3627.37	29575.7	30266.6	43884
Collagen alpha-1(XVIII) chain OS=Homo sapiens OX=9606 GN=COL18A1 PE=1 SV=5	6	7	28	178.1	COL18A1	639442	511934	181742	769206	653856	726995
DNA damage-binding protein 1 OS=Homo sapiens OX=9606 GN=DDB1 PE=1 SV=1	11	11	28	126.9	DDB1	1.78757e+06	1.71213e+06	450996	2.509e+06	1.58904e+06	1.12967e+06
DnaJ homolog subfamily B member 2 OS=Homo sapiens OX=9606 GN=DNAJB2 PE=1 SV=3	28	8	28	35.6	DNAJB2	1.88774e+06	1.89335e+06	1.20475e+06	1.74725e+06	1.57021e+06	1.28619e+06
Fibronectin OS=Homo sapiens OX=9606 GN=FN1 PE=1 SV=5	6	10	28	272.2		1.25742e+06	1.0033e+06	347558	694440	560820	710103
NADH-ubiquinone oxidoreductase 75 kDa subunit, mitochondrial OS=Homo sapiens OX=9606 GN=NDUFS1 PE=1 SV=3	20	11	28	79.4	NDUFS1	927227	422043	203686	824379	732310	805971
Phosphatidylinositol 3,4,5-trisphosphate 5-phosphatase 2 OS=Homo sapiens OX=9606 GN=INPPL1 PE=1 SV=2	9	9	28	138.5	INPPL1	403952	283531	137221	629287	605208	786868
Probable ATP-dependent RNA helicase DDX6 OS=Homo sapiens OX=9606 GN=DDX6 PE=1 SV=2	21	7	28	54.4	DDX6	914802	575631	162202	501418	668479	797358
Probable ubiquitin carboxyl-terminal hydrolase FAF-X OS=Homo sapiens OX=9606 GN=USP9X PE=1 SV=4	3	8	28	290.3		1.05895e+06	750582	252150	754239	587390	691597
Protein diaphanous homolog 3 OS=Homo sapiens OX=9606 GN=DIAPH3 PE=1 SV=4	14	13	28	136.8	DIAPH3	915249	706618	206584	937037	705938	642818
Sorting nexin-8 OS=Homo sapiens OX=9606 GN=SNX8 PE=1 SV=1	15	7	28	52.5	SNX8	3.18392e+06	3.30841e+06	1.18101e+06	4.0417e+06	3.66442e+06	4.48057e+06
T-complex protein 1 subunit gamma OS=Homo sapiens OX=9606 GN=CCT3 PE=1 SV=1	16	8	28	55.6	CCT3	2.95203e+06	795434	563016	1.31544e+06	1.21466e+06	1.27518e+06
Thyroid receptor-interacting protein 6 OS=Homo sapiens OX=9606 GN=TRIP6 PE=1 SV=3	29	7	28	50.3	TRIP6	1.40565e+06	716461	238908	884206	667929	1.40246e+06
U5 small nuclear ribonucleoprotein 200 kDa helicase OS=Homo sapiens OX=9606 GN=SNRNP200 PE=1 SV=2	9	14	28	244.4	SNRNP200	689371	266968	108637	570627	556031	368295
YTH domain-containing family protein 3 OS=Homo sapiens OX=9606 GN=YTHDF3 PE=1 SV=1	12	5	28	63.8	YTHDF3	716348	615224	379023	1.95466e+06	1.5353e+06	1.54524e+06
60S ribosomal protein L38 OS=Homo sapiens OX=9606 GN=RPL38 PE=1 SV=2	17	2	27	8.2	RPL38	1.64146e+06	2.54094e+06	479007	2.01928e+06	1.63416e+06	2.16501e+06
ATP-dependent Clp protease ATP-binding subunit clpX-like, mitochondrial OS=Homo sapiens OX=9606 GN=CLPX PE=1 SV=2	14	8	27	69.2	CLPX	1.35841e+06	1.00721e+06	630474	1.5147e+06	1.26623e+06	1.29162e+06
Calponin-3 OS=Homo sapiens OX=9606 GN=CNN3 PE=1 SV=1	24	6	27	36.4	CNN3	538141	684388	244130	674467	545878	527120
Centrosomal protein of 170 kDa protein B OS=Homo sapiens OX=9606 GN=CEP170B PE=1 SV=4	8	9	27	171.6	CEP170B; KIAA0284	375614	297981	164770	453058	356678	308128
Coatomer subunit gamma-1 OS=Homo sapiens OX=9606 GN=COPG1 PE=1 SV=1	15	10	27	97.7	COPG1	885002	263966	200525	751965	513196	1.14734e+06
Cullin-associated NEDD8-dissociated protein 1 OS=Homo sapiens OX=9606 GN=CAND1 PE=1 SV=2	10	10	27	136.3	CAND1	2.49744e+06	1.36332e+06	772154	1.44451e+06	1.47821e+06	1.53916e+06
Dolichyl-diphosphooligosaccharide--protein glycosyltransferase subunit 1 OS=Homo sapiens OX=9606 GN=RPN1 PE=1 SV=1	15	8	27	68.5	RPN1	1.26563e+06	1.14689e+06	486970	2.13293e+06	1.51456e+06	2.08858e+06
Eukaryotic translation initiation factor 4 gamma 1 OS=Homo sapiens OX=9606 GN=EIF4G1 PE=1 SV=1	9	10	27	158.5	EIF4G1	1.01356e+06	482433	264987	559799	443884	580671
Galectin-3-binding protein OS=Homo sapiens OX=9606 GN=LGALS3BP PE=1 SV=1	11	6	27	65.3	LGALS3BP	1.72118e+06	1.32693e+06	545204	1.67311e+06	1.39738e+06	1.59778e+06
Kinesin-1 heavy chain OS=Homo sapiens OX=9606 GN=KIF5B PE=1 SV=1	16	13	27	109.6	KIF5B	1.94828e+06	307199	168487	558975	457052	429176
Leucine zipper protein 1 OS=Homo sapiens OX=9606 GN=LUZP1 PE=1 SV=2	13	10	27	120.2	LUZP1	602056	346952	187443	593490	583768	370988
Methylcrotonoyl-CoA carboxylase beta chain, mitochondrial OS=Homo sapiens OX=9606 GN=MCCC2 PE=1 SV=1	20	9	27	61.3	MCCC2	730742	703172	220582	808584	649547	729551
Myosin light polypeptide 6 OS=Homo sapiens OX=9606 GN=MYL6 PE=1 SV=1	14	3	27	26.7	MYL6	5.67758e+06	4.95646e+06	4.32463e+06	7.92096e+06	7.15574e+06	7.17449e+06
Polyadenylate-binding protein 4 OS=Homo sapiens OX=9606 GN=PABPC4 PE=1 SV=1	13	7	27	70.7	PABPC4	958811	732572	235139	816467	653449	1.01713e+06
Polymerase delta-interacting protein 3 OS=Homo sapiens OX=9606 GN=POLDIP3 PE=1 SV=2	23	6	27	46.1	POLDIP3	873385	819837	393156	1.01074e+06	856786	903717
Pre-mRNA 3'-end-processing factor FIP1 OS=Homo sapiens OX=9606 GN=FIP1L1 PE=1 SV=1	14	6	27	66.5	FIP1L1	1.0611e+06	339269	357384	1.30397e+06	1.117e+06	1.21593e+06
Protein disulfide-isomerase A3 OS=Homo sapiens OX=9606 GN=PDIA3 PE=1 SV=4	18	8	27	56.7	PDIA3	1.18348e+06	317159	230237	946213	475198	674505
Protein flightless-1 homolog OS=Homo sapiens OX=9606 GN=FLII PE=1 SV=2	7	7	27	144.7	FLII	901595	512010	208347	808114	768559	1.35759e+06
Saccharopine dehydrogenase-like oxidoreductase OS=Homo sapiens OX=9606 GN=SCCPDH PE=1 SV=1	17	6	27	47.1	SCCPDH	1.2628e+06	1.27536e+06	271871	1.04235e+06	975279	1.85702e+06
Splicing factor 3B subunit 1 OS=Homo sapiens OX=9606 GN=SF3B1 PE=1 SV=3	9	10	27	145.7	SF3B1	1.36256e+06	607470	226915	1.29634e+06	1.15466e+06	985088
Unconventional myosin-Ie OS=Homo sapiens OX=9606 GN=MYO1E PE=1 SV=2	9	8	27	127	MYO1E	1.10635e+06	857256	242278	6.22966e+06	5.35927e+06	5.20854e+06
Vinculin OS=Homo sapiens OX=9606 GN=VCL PE=1 SV=4	11	11	27	123.7	VCL	1.55274e+06	642051	581788	861830	574048	652234
40S ribosomal protein S12 OS=Homo sapiens OX=9606 GN=RPS12 PE=1 SV=3	49	5	26	14.5	RPS12	2.23883e+06	426802	42251.3	886665	1.07828e+06	2.62953e+06
60 kDa poly(U)-binding-splicing factor (Fragment) OS=Homo sapiens OX=9606 GN=PUF60 PE=1 SV=1	13	4	26	54.6		1.59588e+06	1.04285e+06	302223	1.20622e+06	1.04148e+06	1.64325e+06
Coronin-1C OS=Homo sapiens OX=9606 GN=CORO1C PE=1 SV=1	16	7	26	53.2	CORO1C	2.06322e+06	1.19157e+06	215956	728863	781639	1.07312e+06
DnaJ homolog subfamily B member 1 OS=Homo sapiens OX=9606 GN=DNAJB1 PE=1 SV=4	24	7	26	38	DNAJB1	1.47576e+06	1.07493e+06	490292	1.16305e+06	931537	815305
Dolichol-phosphate mannosyltransferase subunit 1 (Fragment) OS=Homo sapiens OX=9606 GN=DPM1 PE=1 SV=1	16	5	26	33.3		1.12971e+06	999144	151571	1.11204e+06	912669	1.36248e+06
Gem-associated protein 5 OS=Homo sapiens OX=9606 GN=GEMIN5 PE=1 SV=3	11	14	26	168.5	GEMIN5	6.92621e+06	60994.9	24473.7	125999	116653	90887.6
Heterogeneous nuclear ribonucleoprotein R OS=Homo sapiens OX=9606 GN=HNRNPR PE=1 SV=1	9	6	26	70.9	HNRNPR	36985.4	47051	63954.8	260400	199526	216226
Kinesin-like protein KIF7 OS=Homo sapiens OX=9606 GN=KIF7 PE=1 SV=2	7	9	26	150.5	KIF7	613603	441919	279614	1.10647e+06	1.00768e+06	672373
L-lactate dehydrogenase OS=Homo sapiens OX=9606 GN=LDHB PE=1 SV=1	22	7	26	37.4		2.61782e+06	486347	403676	1.1154e+06	696474	737232
Protein quaking OS=Homo sapiens OX=9606 GN=QKI PE=1 SV=1	18	4	26	37.6	QKI	248420	146400	64976.6	239021	175618	249286
SNW domain-containing protein 1 OS=Homo sapiens OX=9606 GN=SNW1 PE=1 SV=1	18	10	26	65.4	SNW1	1.34832e+06	1.14906e+06	508675	1.90896e+06	1.53412e+06	1.29758e+06
Transitional endoplasmic reticulum ATPase OS=Homo sapiens OX=9606 GN=VCP PE=1 SV=4	17	10	26	89.3	VCP	1.6428e+06	344999	147459	670144	515050	639076
14-3-3 protein eta OS=Homo sapiens OX=9606 GN=YWHAH PE=1 SV=4	25	6	25	28.2	YWHAH	236905	91287.3	27978.9	187882	120038	58424.1
40S ribosomal protein S14 (Fragment) OS=Homo sapiens OX=9606 GN=RPS14 PE=1 SV=1	25	4	25	16.1		3.91722e+06	3.35602e+06	1.45992e+06	8.06701e+06	4.97998e+06	4.76819e+06
ADP/ATP translocase 1 OS=Homo sapiens OX=9606 GN=SLC25A4 PE=1 SV=4	26	7	25	33	SLC25A4	377826	534468	27045.3	262319	256121	319801
AP complex subunit sigma OS=Homo sapiens OX=9606 GN=AP2S1 PE=1 SV=1	29	4	25	17.3	AP2S1	101507	45514.4	9456.95	1.94408e+07	2.22633e+07	4.90713e+07
Apoptosis-stimulating of p53 protein 2 OS=Homo sapiens OX=9606 GN=TP53BP2 PE=1 SV=2	11	8	25	125.5	TP53BP2	498794	358308	164670	617194	485524	435198
Calponin OS=Homo sapiens OX=9606 GN=CNN2 PE=1 SV=1	21	6	25	32.6	CNN2	5.29628e+06	1.75288e+06	346405	1.48569e+06	932674	868229
Cathepsin D OS=Homo sapiens OX=9606 GN=CTSD PE=1 SV=1	20	7	25	44.2		1.14267e+06	1.05811e+06	415992	2.49642e+06	1.07015e+06	1.74923e+06
cDNA FLJ60124, highly similar to Mitochondrial dicarboxylate carrier OS=Homo sapiens OX=9606 PE=2 SV=1	20	7	25	48.1		622485	528423	89834.9	624672	627325	1.42046e+06
E3 ubiquitin-protein ligase TRIM4 OS=Homo sapiens OX=9606 GN=TRIM4 PE=1 SV=2	20	10	25	57.4	TRIM4	1.21945e+06	1.12645e+06	400149	1.43872e+06	1.1126e+06	1.08186e+06
KH domain-containing, RNA-binding, signal transduction-associated protein 1 OS=Homo sapiens OX=9606 GN=KHDRBS1 PE=1 SV=1	18	6	25	48.2	KHDRBS1	5.72157e+06	4.5602e+06	1.97708e+06	6.65387e+06	5.14339e+06	5.79746e+06
KOW domain-containing protein OS=Homo sapiens OX=9606 PE=3 SV=1	38	6	25	12.7		1.80404e+06	563988	170072	2.56239e+06	1.86785e+06	2.60402e+06
Obscurin-like protein 1 OS=Homo sapiens OX=9606 GN=OBSL1 PE=1 SV=1	5	8	25	197		733906	550671	327609	900690	647990	442118
Uncharacterized protein C6orf132 OS=Homo sapiens OX=9606 GN=C6orf132 PE=1 SV=4	10	9	25	124	C6orf132	557633	708998	274765	581008	485893	585882
40S ribosomal protein S10 OS=Homo sapiens OX=9606 GN=RPS10 PE=1 SV=1	24	5	24	18.9	RPS10	1.06406e+06	614366	248964	1.96781e+06	1.47676e+06	1.85373e+06
60S ribosomal protein L13a OS=Homo sapiens OX=9606 GN=RPL13A PE=1 SV=2	30	6	24	23.6	RPL13A	3.42273e+06	1.538e+06	436490	5.33459e+06	4.90074e+06	5.07676e+06
Aspartate--tRNA ligase, cytoplasmic OS=Homo sapiens OX=9606 GN=DARS1 PE=1 SV=2	20	8	24	57.1	DARS	1.56906e+06	710170	286579	1.3756e+06	910255	846356
CCR4-NOT transcription complex subunit 1 OS=Homo sapiens OX=9606 GN=CNOT1 PE=1 SV=2	6	11	24	266.8	CNOT1	655611	331552	101843	406736	333507	478072
Eukaryotic translation initiation factor 3 subunit L OS=Homo sapiens OX=9606 GN=EIF3L PE=1 SV=1	16	7	24	66.7	EIF3L	1.12455e+06	649870	228865	1.11774e+06	800515	724779
Fragile X mental retardation syndrome-related protein 1 OS=Homo sapiens OX=9606 GN=FXR1 PE=1 SV=3	14	10	24	69.7	FXR1	2.1637e+06	967101	570953	4.15016e+06	3.41104e+06	3.16225e+06
Glutamine--fructose-6-phosphate transaminase (isomerizing) OS=Homo sapiens OX=9606 GN=GFPT1 PE=1 SV=1	13	7	24	70.4		464312	223942	103987	673306	672447	628087
Hemogen OS=Homo sapiens OX=9606 GN=HEMGN PE=1 SV=1	22	11	24	55.3	HEMGN	1.70712e+07			17541.8		10553.3
Leucine-rich repeat-containing protein 59 OS=Homo sapiens OX=9606 GN=LRRC59 PE=1 SV=1	19	6	24	34.9	LRRC59	1.81408e+06	1.02934e+06	185936	3.14201e+06	2.93085e+06	4.06013e+06
Outer mitochondrial membrane protein porin 2 (Fragment) OS=Homo sapiens OX=9606 GN=VDAC2 PE=1 SV=1	24	5	24	30.3	VDAC2	6.47041e+06	1.12972e+06	502311	1.70713e+06	1.20445e+06	1.82531e+06
Poly [ADP-ribose] polymerase 1 OS=Homo sapiens OX=9606 GN=PARP1 PE=1 SV=4	11	9	24	113	PARP1	2.88264e+06	395349	117405	866859	737089	733064
Prohibitin OS=Homo sapiens OX=9606 GN=PHB PE=1 SV=1	29	7	24	29.8	PHB	1.63992e+06	1.09296e+06	319255	1.82839e+06	1.30289e+06	1.61185e+06
Protein PML OS=Homo sapiens OX=9606 GN=PML PE=1 SV=3	12	10	24	97.5	PML	860896	782978	397038	1.02069e+06	812797	697683
Protein-L-isoaspartate(D-aspartate) O-methyltransferase OS=Homo sapiens OX=9606 GN=PCMT1 PE=1 SV=4	25	6	24	24.6	PCMT1	1.14054e+06	755667	285393	556060	653360	637620
Sarcoplasmic/endoplasmic reticulum calcium ATPase 2 OS=Homo sapiens OX=9606 GN=ATP2A2 PE=1 SV=1	9	7	24	114.7	ATP2A2	1.02183e+06	323071	178348	627380	524660	507884
Spectrin beta chain, non-erythrocytic 1 OS=Homo sapiens OX=9606 GN=SPTBN1 PE=1 SV=2	4	7	24	274.4	SPTBN1	558604	337584	302799	643905	569181	664047
Splicing factor 1 OS=Homo sapiens OX=9606 GN=SF1 PE=1 SV=4	8	4	24	68.3	SF1	926448	480261	186747	467259	430903	691498
Splicing factor ESS-2 homolog OS=Homo sapiens OX=9606 GN=ESS2 PE=1 SV=1	19	7	24	52.5	DGCR14; ESS2	461927	626801	221234	772616	741494	1.48952e+06
Structural maintenance of chromosomes protein 2 OS=Homo sapiens OX=9606 GN=SMC2 PE=1 SV=2	10	11	24	135.6	SMC2	805712	356567	129116	824334	533725	537555
Transferrin receptor protein 1 OS=Homo sapiens OX=9606 GN=TFRC PE=1 SV=2	16	11	24	84.8	TFRC	1.69764e+06	1.31489e+06	620337	1.73586e+06	1.30247e+06	1.45968e+06
Ubiquitin carboxyl-terminal hydrolase 7 OS=Homo sapiens OX=9606 GN=USP7 PE=1 SV=2	10	11	24	128.2	USP7	2.27979e+06	1.42271e+06	442623	1.73643e+06	1.21169e+06	1.53554e+06
Valine--tRNA ligase OS=Homo sapiens OX=9606 GN=VARS1 PE=1 SV=4	10	9	24	140.4	VARS; VARS2	1.66805e+06	285327	132974	517112	406868	544461
WD40 repeat-containing protein SMU1 OS=Homo sapiens OX=9606 GN=SMU1 PE=1 SV=2	22	9	24	57.5	SMU1	491031	350616	101807	684865	859095	746851
Zyxin OS=Homo sapiens OX=9606 GN=ZYX PE=1 SV=1	15	6	24	61.2	ZYX	3.20541e+06	346625	273504	458536	306633	315131
1-phosphatidylinositol 4,5-bisphosphate phosphodiesterase beta-4 OS=Homo sapiens OX=9606 GN=PLCB4 PE=1 SV=3	9	8	23	134.4	PLCB4	435339	206599	79976.8	811586	727199	1.04227e+06
40S ribosomal protein S9 OS=Homo sapiens OX=9606 GN=RPS9 PE=1 SV=3	36	8	23	22.6	RPS9	3.83901e+06	2.35549e+06	345913	4.55654e+06	3.21478e+06	6.25718e+06
Band 4.1-like protein 3 OS=Homo sapiens OX=9606 GN=EPB41L3 PE=1 SV=1	9	7	23	116.1		333946	283932	170717	985514	957361	498730
Centrosomal protein of 131 kDa OS=Homo sapiens OX=9606 GN=CEP131 PE=1 SV=1	11	8	23	117.6	AZI1; CEP131	305005	271474	157878	610278	471790	380804
Coatomer subunit alpha OS=Homo sapiens OX=9606 GN=COPA PE=1 SV=2	8	9	23	138.3	COPA	1.69784e+06	578977	177730	1.00292e+06	838802	909955
DnaJ homolog subfamily C member 7 (Fragment) OS=Homo sapiens OX=9606 GN=DNAJC7 PE=1 SV=9	23	6	23	30.4		923656	714551	329248	846590	638229	235136
Elongation factor 1-gamma OS=Homo sapiens OX=9606 GN=EEF1G PE=1 SV=3	15	7	23	50.1	EEF1G	1.34525e+06	547304	285685	846094	787912	1.18587e+06
Glutathione S-transferase LANCL1 (Fragment) OS=Homo sapiens OX=9606 GN=LANCL1 PE=1 SV=1	28	6	23	22		3.00573e+06	2.48271e+06	1.09759e+06	4.11045e+06	3.95091e+06	4.28998e+06
Histone H2A.V OS=Homo sapiens OX=9606 GN=H2AZ2 PE=1 SV=3	31	4	23	13.5	H2AFV	464110	38868	3917.24	73438.3	58258.2	104618
Integrin alpha-3 OS=Homo sapiens OX=9606 GN=ITGA3 PE=1 SV=5	10	9	23	116.5	ITGA3	1035410	776256	490235	1.7563e+06	1.27133e+06	1.88533e+06
Integrin alpha-V OS=Homo sapiens OX=9606 GN=ITGAV PE=1 SV=2	8	8	23	116	ITGAV	630989	730513	216180	770838	717721	1.12875e+06
MICOS complex subunit MIC60 OS=Homo sapiens OX=9606 GN=IMMT PE=1 SV=2	20	12	23	78.9	IMMT	1.87579e+06	951926	531655	1.57015e+06	1.12695e+06	1.14224e+06
Peptidyl-prolyl cis-trans isomerase A OS=Homo sapiens OX=9606 GN=PPIA PE=1 SV=2	39	6	23	18	PPIA	1.47289e+06	164756	53059.8	360206	336860	1.06998e+06
Protein TANC1 OS=Homo sapiens OX=9606 GN=TANC1 PE=1 SV=3	6	8	23	202.1	TANC1	458904	434026	142492	637596	609447	803246
RuvB-like 1 OS=Homo sapiens OX=9606 GN=RUVBL1 PE=1 SV=1	24	8	23	50.2	RUVBL1	2.22601e+06	546984	277710	997460	860386	1.0389e+06
Structural maintenance of chromosomes protein 3 OS=Homo sapiens OX=9606 GN=SMC3 PE=1 SV=2	11	11	23	141.5	SMC3	692514	513642	121258	707400	631186	613315
Tyrosine-protein kinase OS=Homo sapiens OX=9606 GN=TYK2 PE=1 SV=1	6	6	23	112.9		823484	858283	293151	787679	695767	978517
YTH domain-containing family protein 2 OS=Homo sapiens OX=9606 GN=YTHDF2 PE=1 SV=2	11	5	23	62.3	YTHDF2	1.15915e+06	823476	593558	2.04444e+06	1.71642e+06	1.66935e+06
60S ribosomal protein L14 OS=Homo sapiens OX=9606 GN=RPL14 PE=1 SV=4	22	4	22	23.4	RPL14	3.18771e+06	1.86015e+06	920937	4.43124e+06	3.51749e+06	5.24145e+06
60S ribosomal protein L22 (Fragment) OS=Homo sapiens OX=9606 GN=RPL22 PE=1 SV=1	44	5	22	10.4		4.26737e+06	2.19953e+06	671343	6.0167e+06	3.40495e+06	3.83101e+06
60S ribosomal protein L6 OS=Homo sapiens OX=9606 GN=RPL6 PE=1 SV=3	26	7	22	32.7	RPL6	2.67693e+06	1.55012e+06	631337	6.23652e+06	4.31325e+06	6.16258e+06
Arginine--tRNA ligase, cytoplasmic OS=Homo sapiens OX=9606 GN=RARS1 PE=1 SV=2	12	6	22	75.3	RARS	1.73938e+06	517276	257866	1.24693e+06	950841	1.31695e+06
ATP synthase subunit gamma, mitochondrial OS=Homo sapiens OX=9606 GN=ATP5F1C PE=1 SV=1	20	6	22	33	ATP5C1	1.74951e+06	2.24017e+06	694905	2.7842e+06	1.82022e+06	2.24046e+06
Emerin OS=Homo sapiens OX=9606 GN=EMD PE=1 SV=1	30	6	22	29	EMD	5.6643e+06	4.21968e+06	2.71828e+06	7.2625e+06	4.82511e+06	4.56572e+06
Eukaryotic translation initiation factor 2A OS=Homo sapiens OX=9606 GN=EIF2A PE=1 SV=3	16	8	22	64.9	EIF2A	671990	288908	204216	1.5556e+06	1.22035e+06	1.59104e+06
Hexokinase HKDC1 OS=Homo sapiens OX=9606 GN=HKDC1 PE=1 SV=3	7	7	22	102.5	HKDC1	731397	715886	274488	663072	468806	618393
Hexokinase-1 OS=Homo sapiens OX=9606 GN=HK1 PE=1 SV=3	9	9	22	102.4	HK1	1.58177e+06	939545	300077	850617	715153	903616
Inactive ubiquitin carboxyl-terminal hydrolase 54 OS=Homo sapiens OX=9606 GN=USP54 PE=1 SV=4	7	10	22	187.3	USP54	579938	500078	186916	813355	860679	1.35091e+06
Kinectin OS=Homo sapiens OX=9606 GN=KTN1 PE=1 SV=1	8	10	22	156.2	KTN1	835437	575899	320559	1.44356e+06	1.32774e+06	1.29177e+06
Lamin-B1 OS=Homo sapiens OX=9606 GN=LMNB1 PE=1 SV=2	18	10	22	66.4	LMNB1	1.41203e+06	692907	400287	658202	578653	421303
Nucleophosmin OS=Homo sapiens OX=9606 GN=NPM1 PE=1 SV=2	18	5	22	32.6	NPM1	8.0864e+06	1.10578e+06	376811	3.04678e+06	2.69354e+06	6.0513e+06
Pre-mRNA-processing-splicing factor 8 OS=Homo sapiens OX=9606 GN=PRPF8 PE=1 SV=2	4	9	22	273.4	PRPF8	882607	223956	92538.6	555370	446728	485257
Protein Njmu-R1 OS=Homo sapiens OX=9606 GN=C17orf75 PE=1 SV=2	18	7	22	44.6	C17orf75	1.15959e+06	1.36893e+06	444432	1.95353e+06	1.56728e+06	2.0074e+06
RING-type E3 ubiquitin transferase (Fragment) OS=Homo sapiens OX=9606 GN=MIB2 PE=1 SV=1	13	9	22	89.8		676324	579676	338018	540936	575634	542691
Sulfhydryl oxidase 1 OS=Homo sapiens OX=9606 GN=QSOX1 PE=1 SV=3	11	6	22	82.5	QSOX1	451813	326037	230800	392042	352134	329507
T-complex protein 1 subunit zeta OS=Homo sapiens OX=9606 GN=CCT6A PE=1 SV=3	21	9	22	58	CCT6A	2.84785e+06	283268	183506	645542	447201	606532
Tight junction protein 1 (Zona occludens 1), isoform CRA_a OS=Homo sapiens OX=9606 GN=TJP1 PE=1 SV=1	8	11	22	197.3	TJP1	632151	509079	213849	1.25331e+06	980608	1.00755e+06
Tight junction protein ZO-1 OS=Homo sapiens OX=9606 GN=TJP1 PE=1 SV=1	9	11	22	187.7		14244.4	7263.08				41933.7
Vacuolar protein sorting-associated protein 35 OS=Homo sapiens OX=9606 GN=VPS35 PE=1 SV=2	9	6	22	91.6	VPS35	1.07338e+06	769508	313705	1.19591e+06	1.00482e+06	1.17824e+06
Voltage-dependent anion-selective channel protein 1 OS=Homo sapiens OX=9606 GN=VDAC1 PE=1 SV=2	37	9	22	30.8	VDAC1	2.36887e+06	1.39421e+06	216771	1.69514e+06	780497	1.83149e+06
WD repeat-containing protein 5 OS=Homo sapiens OX=9606 GN=WDR5 PE=1 SV=1	32	7	22	36.6	WDR5	1.16072e+06	594080	571677	1.1877e+06	1.24926e+06	784915
Zinc finger CCCH domain-containing protein 18 OS=Homo sapiens OX=9606 GN=ZC3H18 PE=1 SV=2	10	7	22	106.3	ZC3H18	779791	394486	167728	1.82014e+06	1.46872e+06	1.15209e+06
14-3-3 protein sigma OS=Homo sapiens OX=9606 GN=SFN PE=1 SV=1	13	4	21	27.8	SFN	1.82622e+06	840878	487027	1.56262e+06	985464	873130
26S proteasome non-ATPase regulatory subunit 11 OS=Homo sapiens OX=9606 GN=PSMD11 PE=1 SV=3	21	8	21	47.4	PSMD11	731113	378641	228706	738639	566204	715967
40S ribosomal protein S6 OS=Homo sapiens OX=9606 GN=RPS6 PE=1 SV=1	31	7	21	28.7	RPS6	1.46235e+06	1.29962e+06	218604	2.90467e+06	1.48864e+06	1.9357e+06
60S ribosomal protein L28 OS=Homo sapiens OX=9606 GN=RPL28 PE=1 SV=3	48	8	21	15.7	RPL28	2.10153e+06	1.01245e+06	142985	2.87639e+06	2.12892e+06	3.22361e+06
60S ribosomal protein L3 OS=Homo sapiens OX=9606 GN=RPL3 PE=1 SV=2	18	6	21	46.1	RPL3	1.49829e+06	495702	239206	2.17854e+06	1.55266e+06	1.41949e+06
60S ribosomal protein L5 (Fragment) OS=Homo sapiens OX=9606 GN=RPL5 PE=1 SV=1	26	6	21	27		1.65574e+06	1.21468e+06	227768	3.12334e+06	3.18374e+06	4.02918e+06
Cancer-related nucleoside-triphosphatase OS=Homo sapiens OX=9606 GN=NTPCR PE=1 SV=1	30	5	21	25.1	NTPCR	2.11841e+06	1.89361e+06	429818	1.53867e+06	1.83002e+06	3.17022e+06
Centrosome and spindle pole-associated protein 1 OS=Homo sapiens OX=9606 GN=CSPP1 PE=4 SV=1	7	6	21	139.4		541809	382280	91634.3	438542	458155	503189
Core histone macro-H2A.1 OS=Homo sapiens OX=9606 GN=MACROH2A1 PE=1 SV=4	24	6	21	39.6	H2AFY	1.2206e+06	615062	190686	640127	678632	868555
Diacylglycerol kinase alpha OS=Homo sapiens OX=9606 GN=DGKA PE=1 SV=3	9	5	21	82.6	DGKA	389720	290368	114632	521915	402237	530171
DnaJ homolog subfamily C member 10 OS=Homo sapiens OX=9606 GN=DNAJC10 PE=1 SV=2	10	7	21	91	DNAJC10	1.86456e+06	1.73365e+06	841227	2.73622e+06	2.24012e+06	2.28947e+06
Eukaryotic translation initiation factor 3 subunit C-like protein OS=Homo sapiens OX=9606 GN=EIF3CL PE=1 SV=1	10	8	21	105.4	EIF3CL	1.41379e+06	608720	243745	1.20487e+06	967196	896560
F-BAR domain only protein 2 OS=Homo sapiens OX=9606 GN=FCHO2 PE=1 SV=2	19	11	21	88.9	FCHO2	41536.6	25908.5	21910.6	1.39371e+06	1.06779e+06	1.04196e+06
Glutaminyl-peptide cyclotransferase-like protein OS=Homo sapiens OX=9606 GN=QPCTL PE=1 SV=2	13	5	21	42.9	QPCTL	1.40295e+06	1.20913e+06	496527	1.49208e+06	1.37239e+06	1.23715e+06
Heterogeneous nuclear ribonucleoprotein U-like protein 1 OS=Homo sapiens OX=9606 GN=HNRNPUL1 PE=1 SV=2	11	6	21	95.7	HNRNPUL1	498990	201604	162173	735511	518493	556380
Importin subunit beta-1 OS=Homo sapiens OX=9606 GN=KPNB1 PE=1 SV=2	8	6	21	97.1	KPNB1	1.78497e+06	1.10207e+06	757881	1.99174e+06	1.41388e+06	1.61097e+06
mRNA cap guanine-N7 methyltransferase OS=Homo sapiens OX=9606 GN=RNMT PE=1 SV=1	15	6	21	54.8	RNMT	1.42221e+06	1.25606e+06	569136	1.39772e+06	912942	953078
Neutral cholesterol ester hydrolase 1 OS=Homo sapiens OX=9606 GN=NCEH1 PE=1 SV=1	9	3	21	49.9	NCEH1	829215	542455	209738	655659	593749	1.33738e+06
Partitioning defective 3 homolog OS=Homo sapiens OX=9606 GN=PARD3 PE=1 SV=2	9	10	21	151.3	PARD3	1.18056e+07	1.27393e+07	2.11478e+06	1.88775e+07	1.15888e+07	1.5487e+07
Ribosomal protein S6 kinase alpha-3 OS=Homo sapiens OX=9606 GN=RPS6KA3 PE=1 SV=1	11	7	21	83.7	RPS6KA3	534061	459787	206602	1.25575e+06	981096	895650
Tensin-3 OS=Homo sapiens OX=9606 GN=TNS3 PE=1 SV=2	6	7	21	155.2	TNS3	249599	381520	239789	724051	601680	450072
Transgelin-2 OS=Homo sapiens OX=9606 GN=TAGLN2 PE=1 SV=3	33	6	21	22.4	TAGLN2	1.40429e+06	838948	315808	1.06763e+06	810417	1.17925e+06
UDP-glucose:glycoprotein glucosyltransferase 2 OS=Homo sapiens OX=9606 GN=UGGT2 PE=1 SV=4	5	8	21	174.6	UGGT2	790183	914383	238602	556571	517359	592795
Vesicle-trafficking protein SEC22b OS=Homo sapiens OX=9606 GN=SEC22B PE=1 SV=4	33	6	21	24.6	SEC22B	816610	581161	274014	1.18261e+06	811591	699592
X-ray repair cross-complementing protein 6 OS=Homo sapiens OX=9606 GN=XRCC6 PE=1 SV=2	15	9	21	69.8	XRCC6	1.02142e+06	267103	99080	812975	682774	1.00749e+06
26S proteasome regulatory subunit 7 OS=Homo sapiens OX=9606 GN=PSMC2 PE=1 SV=3	16	6	20	48.6	PSMC2	721755	323246	133398	538604	323733	357654
28S ribosomal protein S27, mitochondrial OS=Homo sapiens OX=9606 GN=MRPS27 PE=1 SV=1	15	6	20	41.3	MRPS27	615881	609228	176519	995984	839792	686789
40S ribosomal protein S2 OS=Homo sapiens OX=9606 GN=RPS2 PE=1 SV=1	13	3	20	25.2		4.08664e+06	3.1779e+06	1.56283e+06	1.10816e+07	8.79289e+06	1.03643e+07
40S ribosomal protein S4, Y isoform 1 OS=Homo sapiens OX=9606 GN=RPS4Y1 PE=1 SV=2	19	6	20	29.4	RPS4Y1	288833	172295	34350.4	339507	216520	140306
60S ribosomal protein L8 OS=Homo sapiens OX=9606 GN=RPL8 PE=1 SV=2	20	6	20	28	RPL8	4.97993e+06	2.91722e+06	800996	8.41042e+06	7.59736e+06	9.39427e+06
Ankyrin repeat domain-containing protein 17 OS=Homo sapiens OX=9606 GN=ANKRD17 PE=1 SV=3	7	9	20	274.1	ANKRD17	23020.3	4685.62		49683.6	37082	19087.2
Coiled-coil domain-containing protein 9B OS=Homo sapiens OX=9606 GN=CCDC9B PE=1 SV=1	12	5	20	57.3	C15orf52; CCDC9B	260592	305319	220024	998564	689328	525384
DnaJ homolog subfamily A member 2 OS=Homo sapiens OX=9606 GN=DNAJA2 PE=1 SV=1	12	5	20	45.7	DNAJA2	4.81555e+06	3.95772e+06	2.53149e+06	5.99179e+06	4.07408e+06	3.57708e+06
Guanine nucleotide exchange factor H1 OS=Homo sapiens OX=9606 GN=ARHGEF2 PE=1 SV=1	7	6	20	116		628384	266391	144663	721291	637624	594728
Heat shock protein 105 kDa OS=Homo sapiens OX=9606 GN=HSPH1 PE=1 SV=1	16	10	20	96.8	HSPH1	1.19574e+06	231590	77551.9	398644	222516	281685
Long-chain-fatty-acid--CoA ligase 4 OS=Homo sapiens OX=9606 GN=ACSL4 PE=1 SV=2	11	6	20	79.1	ACSL4	626171	555270	393564	676144	480537	493685
Moesin OS=Homo sapiens OX=9606 GN=MSN PE=1 SV=3	19	10	20	67.8	MSN	3.17507e+06	1.16268e+06	602208	1.39159e+06	1.15043e+06	1.6106e+06
Myoferlin OS=Homo sapiens OX=9606 GN=MYOF PE=1 SV=1	5	9	20	234.6	MYOF	512033	592973	227396	894088	705779	1.06328e+06
Neuron navigator 1 OS=Homo sapiens OX=9606 GN=NAV1 PE=1 SV=2	7	8	20	202.3	NAV1	206588	168252	97145.2	327784	307583	330162
Procollagen-lysine 5-dioxygenase OS=Homo sapiens OX=9606 GN=PLOD2 PE=1 SV=1	8	5	20	81.1		753028	666429	354673	810734	653154	546798
Protein disulfide-isomerase OS=Homo sapiens OX=9606 GN=P4HB PE=1 SV=3	15	7	20	57.1	P4HB	697642	515461	328824	927425	714258	739162
Regulator of nonsense transcripts 1 OS=Homo sapiens OX=9606 GN=UPF1 PE=1 SV=2	9	9	20	124.3	UPF1	1.01476e+06	468944	215779	624122	626032	696148
Serine/threonine-protein kinase Nek7 OS=Homo sapiens OX=9606 GN=NEK7 PE=1 SV=1	25	7	20	34.5	NEK7	1.56394e+06	1.49061e+06	287346	1.02684e+06	958932	1.58175e+06
Solute carrier family 2, facilitated glucose transporter member 1 OS=Homo sapiens OX=9606 GN=SLC2A1 PE=1 SV=2	5	3	20	54	SLC2A1	739883	379505	63061	289296	339113	644149
Splicing factor, proline- and glutamine-rich OS=Homo sapiens OX=9606 GN=SFPQ PE=1 SV=2	8	5	20	76.1	SFPQ	2.13428e+06	925177	245281	1.08748e+06	1.06292e+06	1.45307e+06
Threonine--tRNA ligase, mitochondrial OS=Homo sapiens OX=9606 GN=TARS2 PE=1 SV=1	16	10	20	81	TARS2	540379	430250	241683	1.06675e+06	847993	817802
Trifunctional enzyme subunit beta, mitochondrial OS=Homo sapiens OX=9606 GN=HADHB PE=1 SV=3	10	5	20	51.3	HADHB	1.01925e+06	755630	289226	1.20765e+06	922214	1.1981e+06
Triosephosphate isomerase OS=Homo sapiens OX=9606 GN=TPI1 PE=1 SV=4	30	6	20	26.7	TPI1	759159	357960	427250	450957	263613	344155
WD repeat-containing protein 48 OS=Homo sapiens OX=9606 GN=WDR48 PE=1 SV=1	11	6	20	76.2	WDR48	254284	303215	150780	474924	246614	221094
26S proteasome non-ATPase regulatory subunit 4 OS=Homo sapiens OX=9606 GN=PSMD4 PE=1 SV=1	16	4	19	40.7	PSMD4	358106	198107	139459	366600	338131	299620
60S ribosomal protein L24 OS=Homo sapiens OX=9606 GN=RPL24 PE=1 SV=1	19	3	19	17.8	RPL24	2.55648e+06	667622	300532	5.13276e+06	3.1369e+06	5.22862e+06
Activating signal cointegrator 1 complex subunit 3 OS=Homo sapiens OX=9606 GN=ASCC3 PE=1 SV=3	4	8	19	251.3	ASCC3	448616	388804	121723	830707	701972	847424
Arf-GAP with GTPase, ANK repeat and PH domain-containing protein 3 OS=Homo sapiens OX=9606 GN=AGAP3 PE=1 SV=2	12	8	19	95	AGAP3	459426	225467	114168	346152	276209	296479
Atherin OS=Homo sapiens OX=9606 GN=SAMD1 PE=1 SV=1	16	4	19	56	SAMD1	313240	276035	156871	286087	264096	318586
Coiled-coil domain-containing protein 32 OS=Homo sapiens OX=9606 GN=CCDC32 PE=1 SV=1	13	4	19	22.8					2.78032e+06	2.28961e+06	1.79862e+06
Cold shock domain-containing protein E1 OS=Homo sapiens OX=9606 GN=CSDE1 PE=1 SV=2	9	7	19	88.8	CSDE1	1.26801e+06	553532	313045	1.29636e+06	1.06513e+06	1.07089e+06
Constitutive coactivator of PPAR-gamma-like protein 1 OS=Homo sapiens OX=9606 GN=FAM120A PE=1 SV=2	11	8	19	121.8	FAM120A	627172	468535	111435	801026	503438	481783
DmX-like protein 1 OS=Homo sapiens OX=9606 GN=DMXL1 PE=1 SV=1	5	10	19	340	DMXL1	424645	372614	69130.4	375094	279293	274174
DnaJ homolog subfamily B member 12 OS=Homo sapiens OX=9606 GN=DNAJB12 PE=1 SV=5	12	5	19	41.8	DNAJB12	609896	733298	226156	1.03646e+06	776057	527498
DnaJ homolog subfamily C member 3 OS=Homo sapiens OX=9606 GN=DNAJC3 PE=1 SV=1	9	6	19	57.5	DNAJC3	1.04063e+06	1.23941e+06	491886	1.25063e+06	925746	1.08402e+06
Elongator complex protein 1 OS=Homo sapiens OX=9606 GN=ELP1 PE=4 SV=1	6	5	19	148.1		299136	103621	41038.2	182468	133967	130711
Eukaryotic translation initiation factor 3 subunit F OS=Homo sapiens OX=9606 GN=EIF3F PE=1 SV=1	22	6	19	37.5	EIF3F	1.08502e+06	934085	322182	1.1083e+06	1.23205e+06	1.3504e+06
Eukaryotic translation initiation factor 3 subunit I OS=Homo sapiens OX=9606 GN=EIF3I PE=1 SV=1	19	6	19	36.5	EIF3I	1.20227e+06	719154	88335.5	893148	839931	763730
Exocyst complex component 4 OS=Homo sapiens OX=9606 GN=EXOC4 PE=1 SV=1	7	5	19	110.4	EXOC4	320721	142098	119157	455526	377483	291405
Extended synaptotagmin-1 OS=Homo sapiens OX=9606 GN=ESYT1 PE=1 SV=1	6	5	19	122.8	ESYT1	1.09206e+06	397000	227202	643133	557004	719614
Heterogeneous nuclear ribonucleoprotein H3 OS=Homo sapiens OX=9606 GN=HNRNPH3 PE=1 SV=2	19	5	19	36.9	HNRNPH3	696232	293158	203542	754293	834590	734504
Methionine--tRNA ligase, cytoplasmic OS=Homo sapiens OX=9606 GN=MARS1 PE=1 SV=2	11	8	19	101.1	MARS	1.16089e+06	219330	85158.8	619263	462284	497102
Multiple PDZ domain protein OS=Homo sapiens OX=9606 GN=MPDZ PE=1 SV=2	5	8	19	221.5	MPDZ	674612	416094	88577.9	533879	455576	979749
NADH-cytochrome b5 reductase 3 OS=Homo sapiens OX=9606 GN=CYB5R3 PE=1 SV=3	16	4	19	34.2	CYB5R3	1.74656e+06	1.34155e+06	619662	612763	1.47765e+06	2.07492e+06
Phosphate carrier protein, mitochondrial OS=Homo sapiens OX=9606 GN=SLC25A3 PE=1 SV=2	16	6	19	40.1	SLC25A3	7.6058e+06	7.29472e+06	2.33895e+06	8.07783e+06	7.03701e+06	1.03336e+07
Pleckstrin homology-like domain family B member 1 OS=Homo sapiens OX=9606 GN=PHLDB1 PE=1 SV=1	11	9	19	151.1	PHLDB1	306533	310685	86175.2	610769	521738	675658
Proliferation marker protein Ki-67 OS=Homo sapiens OX=9606 GN=MKI67 PE=1 SV=2	5	9	19	358.5	MKI67	560335	156584	81487.6	355625	300693	261481
Protein unc-45 homolog A OS=Homo sapiens OX=9606 GN=UNC45A PE=1 SV=1	7	6	19	118.3		327840	292039	123428	409082	350522	358066
RalBP1-associated Eps domain-containing protein 2 OS=Homo sapiens OX=9606 GN=REPS2 PE=1 SV=2	18	8	19	71.5	REPS2			4800.67	387159	338371	374704
Ras-related C3 botulinum toxin substrate 1 OS=Homo sapiens OX=9606 GN=RAC1 PE=1 SV=1	22	5	19	21.4	RAC1	1.7169e+06	1.53675e+06	368154	1.15739e+06	936742	1.29829e+06
Ras-related protein Rab-5C OS=Homo sapiens OX=9606 GN=RAB5C PE=1 SV=2	31	5	19	23.5	RAB5C	846517	520288	333156	858608	696928	467120
RNA helicase OS=Homo sapiens OX=9606 GN=DHX30 PE=1 SV=1	7	8	19	130.5	DHX30	8.35318e+07	2.97457e+06	1.6774e+06	6.14601e+06	4.91584e+06	4.37392e+06
Structural maintenance of chromosomes protein 1A OS=Homo sapiens OX=9606 GN=SMC1A PE=1 SV=2	6	7	19	143.1	SMC1A	771831	479983	192686	872535	756174	736780
T-complex protein 1 subunit delta OS=Homo sapiens OX=9606 GN=CCT4 PE=1 SV=4	25	12	19	57.9	CCT4	3.87958e+06	495426	159971	810424	553242	703271
Transportin-1 OS=Homo sapiens OX=9606 GN=TNPO1 PE=1 SV=2	9	7	19	102.3	TNPO1	728004	268298	115987	696386	539303	703273
Ubiquitin carboxyl-terminal hydrolase 5 OS=Homo sapiens OX=9606 GN=USP5 PE=1 SV=2	9	6	19	95.7	USP5	574330	223123	162805	477613	356601	307685
UDP-glucose:glycoprotein glucosyltransferase 1 OS=Homo sapiens OX=9606 GN=UGGT1 PE=1 SV=3	5	8	19	177.1	UGGT1	396849	304041	129869	475328	452813	359170
Unconventional myosin-XIX OS=Homo sapiens OX=9606 GN=MYO19 PE=1 SV=2	11	7	19	109.1	MYO19	313332	236633	133597	337186	369161	467715
YTH domain-containing family protein 1 OS=Homo sapiens OX=9606 GN=YTHDF1 PE=1 SV=1	15	4	19	60.8	YTHDF1	238214	195796	79268.6	489401	388982	432233
Acylglycerol kinase, mitochondrial OS=Homo sapiens OX=9606 GN=AGK PE=1 SV=1	19	6	18	43.8		556349	560969	106656	572406	398108	591925
AFG3-like protein 2 OS=Homo sapiens OX=9606 GN=AFG3L2 PE=1 SV=2	10	7	18	88.5	AFG3L2	908535	733047	297902	1.38551e+06	1.03071e+06	1.48665e+06
Ataxin-2 OS=Homo sapiens OX=9606 GN=ATXN2 PE=1 SV=1	5	4	18	127.1		528906	279481	175621	471395	408659	337681
Dolichyl-diphosphooligosaccharide--protein glycosyltransferase 48 kDa subunit OS=Homo sapiens OX=9606 GN=DDOST PE=1 SV=4	11	4	18	50.8	DDOST	1.00433e+06	442092	291040	876862	721988	808235
E3 ubiquitin-protein ligase XIAP OS=Homo sapiens OX=9606 GN=XIAP PE=1 SV=2	15	6	18	56.6	XIAP	451182	260183	112253	424399	587610	468113
Eukaryotic translation initiation factor 3 subunit E OS=Homo sapiens OX=9606 GN=EIF3E PE=1 SV=1	15	6	18	52.2	EIF3E	1.17745e+06	759241	392493	1.4877e+06	924434	862807
Ezrin OS=Homo sapiens OX=9606 GN=EZR PE=1 SV=4	15	8	18	69.4	EZR	1.02417e+06	342766	341543	1.08114e+06	838825	490181
Histone H3.3 OS=Homo sapiens OX=9606 GN=H3-3A PE=1 SV=2	13	3	18	15.3	H3F3A; H3F3AP4; H3F3B	1.89226e+07	7244887	3.22428e+06	1.11063e+07	8.70617e+06	1.06229e+07
Kinesin-like protein KIF11 OS=Homo sapiens OX=9606 GN=KIF11 PE=1 SV=2	17	15	18	119.1	KIF11	8.53732e+06	29216.9	16601.5	64488.4	71859.8	132253
La-related protein 1 OS=Homo sapiens OX=9606 GN=LARP1 PE=1 SV=2	11	7	18	123.4	LARP1	707463	345126	141821	733018	609663	430421
Malate dehydrogenase, mitochondrial OS=Homo sapiens OX=9606 GN=MDH2 PE=1 SV=3	27	7	18	35.5	MDH2	3.31503e+06	124500	72028.4	261059	160169	349948
Melanoma-associated antigen D1 OS=Homo sapiens OX=9606 GN=MAGED1 PE=1 SV=3	11	7	18	86.1	MAGED1	465989	333705	252096	932541	795030	692501
Non-receptor tyrosine-protein kinase TNK1 OS=Homo sapiens OX=9606 GN=TNK1 PE=1 SV=3	8	5	18	72.4	TNK1	1.42396e+06	1.4244e+06	450866	948224	949828	1.53356e+06
Peptide deformylase, mitochondrial OS=Homo sapiens OX=9606 GN=PDF PE=1 SV=1	21	5	18	27	PDF	3.39892e+06	2.98193e+06	1.44473e+06	4.74314e+06	5.20278e+06	6.24337e+06
Phosphoglycerate kinase 1 OS=Homo sapiens OX=9606 GN=PGK1 PE=1 SV=3	28	9	18	44.6	PGK1	2.43449e+06	288636	274663	209904	143684	307512
Profilin-1 OS=Homo sapiens OX=9606 GN=PFN1 PE=1 SV=2	40	4	18	15	PFN1	3.79747e+06	587094	308096	717606	466660	683218
Ras-related protein Rab-7a OS=Homo sapiens OX=9606 GN=RAB7A PE=1 SV=1	32	5	18	23.5	RAB7A	1.21577e+06	535239	255551	1.03085e+06	760718	833771
Replication protein A 70 kDa DNA-binding subunit OS=Homo sapiens OX=9606 GN=RPA1 PE=1 SV=2	13	5	18	68.1	RPA1	746597	452638	162477	511905	418108	478787
Ribonucleoprotein PTB-binding 1 OS=Homo sapiens OX=9606 GN=RAVER1 PE=1 SV=1	12	6	18	77.8		1.1306e+06	1.24999e+06	510240	972945	913209	1.36499e+06
Ricin B-type lectin domain-containing protein OS=Homo sapiens OX=9606 PE=1 SV=1	5	3	18	64.2		589223	847179	164296	842646	547941	643312
Schlafen family member 5 OS=Homo sapiens OX=9606 GN=SLFN5 PE=1 SV=1	7	6	18	101	SLFN5	841593	1.11293e+06	225069	1.38492e+06	870574	1.21661e+06
Secretory carrier-associated membrane protein 3 OS=Homo sapiens OX=9606 GN=SCAMP3 PE=1 SV=3	19	5	18	38.3	SCAMP3	368721	108829	63280.9	227371	240448	303523
Septin-2 OS=Homo sapiens OX=9606 GN=SEPTIN2 PE=1 SV=1	23	5	18	41.5	SEPT2	747913	795892	244160	898191	828461	867227
Serine/threonine-protein kinase A-Raf OS=Homo sapiens OX=9606 GN=ARAF PE=1 SV=2	16	8	18	67.5	ARAF	1.01238e+06	959681	353464	944430	778462	982361
Src substrate cortactin OS=Homo sapiens OX=9606 GN=CTTN PE=1 SV=2	18	8	18	61.5	CTTN	1.05139e+06	361683	152698	692230	468720	343711
Torsin-1A-interacting protein 1 OS=Homo sapiens OX=9606 GN=TOR1AIP1 PE=1 SV=1	11	4	18	52.4		449038	281033	124110	446724	320577	415491
Trafficking protein particle complex subunit 9 OS=Homo sapiens OX=9606 GN=TRAPPC9 PE=1 SV=2	6	6	18	128.4	TRAPPC9	860521	860222	424170	1.48457e+06	1.27691e+06	1.99977e+06
Trypsin-1 OS=Homo sapiens OX=9606 GN=PRSS1 PE=1 SV=1	7	2	18	28.1		3.21531e+07	74454.1	17808.3	7549.7	13258.2	14799.3
Uveal autoantigen with coiled-coil domains and ankyrin repeats OS=Homo sapiens OX=9606 GN=UACA PE=1 SV=1	7	9	18	161.2		338905	371603	107416	606139	643947	657055
Zinc finger CCCH domain-containing protein 14 OS=Homo sapiens OX=9606 GN=ZC3H14 PE=1 SV=1	13	8	18	82.8	ZC3H14	337329	218403	192938	756855	600484	570170
5'-AMP-activated protein kinase catalytic subunit alpha-1 OS=Homo sapiens OX=9606 GN=PRKAA1 PE=1 SV=4	10	5	17	64	PRKAA1	895794	707854	220446	1.00378e+06	802986	1.24336e+06
60S ribosomal protein L27a OS=Homo sapiens OX=9606 GN=RPL27A PE=1 SV=1	23	3	17	12.2		2.65504e+06	1.28e+06	533843	5.67332e+06	3.90073e+06	4.9493e+06
Aminopeptidase OS=Homo sapiens OX=9606 GN=NPEPPS PE=1 SV=1	10	9	17	102.9	NPEPPS	835176	337100	122501	514702	444059	776719
ATP-binding cassette sub-family F member 3 OS=Homo sapiens OX=9606 GN=ABCF3 PE=1 SV=2	12	6	17	79.7	ABCF3	451089	350295	108616	467526	380687	547461
Coatomer subunit beta' OS=Homo sapiens OX=9606 GN=COPB2 PE=1 SV=2	6	5	17	102.4	COPB2	686087	494787	198651	657506	577630	664998
Disco-interacting protein 2 homolog B OS=Homo sapiens OX=9606 GN=DIP2B PE=1 SV=3	8	9	17	171.4	DIP2B	299077	121515	67309.8	337886	285437	258429
Dynamin-2 OS=Homo sapiens OX=9606 GN=DNM2 PE=1 SV=2	11	8	17	98	DNM2	723426	476731	215068	601759	507538	782189
Immunoglobulin kappa variable 2-29 OS=Homo sapiens OX=9606 GN=IGKV2-29 PE=3 SV=2	17	2	17	13.1	IGKV2-29	1.29615e+08	270171	108833	243005	334716	303954
Kelch repeat and BTB domain-containing protein 11 OS=Homo sapiens OX=9606 GN=KBTBD11 PE=1 SV=1	13	6	17	65.7	KBTBD11	361625	424980	71609.1	726510	548033	770931
Lamina-associated polypeptide 2, isoforms beta/gamma OS=Homo sapiens OX=9606 GN=TMPO PE=1 SV=1	16	5	17	46.3	TMPO	159559	213828	67860.2	275469	152102	196934
Mitochondrial 2-oxoglutarate/malate carrier protein OS=Homo sapiens OX=9606 GN=SLC25A11 PE=1 SV=3	23	4	17	34	SLC25A11	1.3356e+06	949938	608707	1.03495e+06	764634	939421
Neutral alpha-glucosidase AB OS=Homo sapiens OX=9606 GN=GANAB PE=1 SV=3	7	6	17	106.8	GANAB	441796	441252	147363	515228	355466	498391
Nuclear pore membrane glycoprotein 210 OS=Homo sapiens OX=9606 GN=NUP210 PE=1 SV=3	4	5	17	205	NUP210	430665	130916	43402.8	122564	136781	165931
Nucleolar RNA helicase 2 OS=Homo sapiens OX=9606 GN=DDX21 PE=1 SV=5	11	7	17	87.3	DDX21	666165	156362	67708.4	385385	356794	555649
Pleckstrin homology domain-containing family A member 6 OS=Homo sapiens OX=9606 GN=PLEKHA6 PE=1 SV=1	9	7	17	119.2	PLEKHA6	650983	474060	209547	696087	717024	577248
Proto-oncogene tyrosine-protein kinase Src OS=Homo sapiens OX=9606 GN=SRC PE=1 SV=3	16	7	17	59.8	SRC	510023	522543	243844	740995	569458	732060
Replication factor C subunit 5 OS=Homo sapiens OX=9606 GN=RFC5 PE=1 SV=1	24	7	17	38.5	RFC5	635681	651805	154036	715778	564789	793021
RNA-binding protein 27 OS=Homo sapiens OX=9606 GN=RBM27 PE=1 SV=2	10	8	17	118.6	RBM27	534679	227122	181875	542379	518189	446790
SCY1-like protein 2 (Fragment) OS=Homo sapiens OX=9606 GN=SCYL2 PE=1 SV=1	17	9	17	77		7.00949e+06	12705.9	8993.2	12805.6	16251.4	31302.1
TBC1 domain family member 2B OS=Homo sapiens OX=9606 GN=TBC1D2B PE=1 SV=2	13	8	17	109.8	TBC1D2B	275515	277965	127986	626813	456385	360128
T-complex protein 1 subunit eta OS=Homo sapiens OX=9606 GN=CCT7 PE=1 SV=2	20	9	17	59.3	CCT7	2.23394e+06	762982	440601	1.02265e+06	704853	999511
Treacle protein OS=Homo sapiens OX=9606 GN=TCOF1 PE=1 SV=3	11	11	17	152	TCOF1	2.04242e+06	43135.5	33079.9	306978	206100	220600
Tropomyosin alpha-3 chain OS=Homo sapiens OX=9606 GN=TPM3 PE=1 SV=1	32	8	17	26.4	TPM3	1.26717e+07	248087	282218	423064	493248	676819
V-type proton ATPase subunit B, brain isoform OS=Homo sapiens OX=9606 GN=ATP6V1B2 PE=1 SV=3	16	6	17	56.5	ATP6V1B2	491214	107795	88700	226855	254951	260444
X-ray repair cross-complementing protein 5 OS=Homo sapiens OX=9606 GN=XRCC5 PE=1 SV=3	11	8	17	82.7	XRCC5	1.14557e+06	446666	102892	1.01489e+06	675531	1.09268e+06
182 kDa tankyrase-1-binding protein OS=Homo sapiens OX=9606 GN=TNKS1BP1 PE=1 SV=4	4	5	16	181.7	TNKS1BP1	300247	169116	137940	304141	265267	216773
2-aminoethanethiol dioxygenase OS=Homo sapiens OX=9606 GN=ADO PE=1 SV=2	13	3	16	29.7	ADO	274137	209338	100345	377259	305083	201033
40S ribosomal protein S21 OS=Homo sapiens OX=9606 GN=RPS21 PE=1 SV=1	41	3	16	9.1	RPS21	338819	205278	81347.4	1.06091e+06	1.08906e+06	704851
40S ribosomal protein S23 OS=Homo sapiens OX=9606 GN=RPS23 PE=1 SV=3	21	3	16	15.8	RPS23	2.40301e+06	2.19205e+06	145193	2.00734e+06	2.11173e+06	4.59188e+06
60S ribosomal protein L27 OS=Homo sapiens OX=9606 GN=RPL27 PE=1 SV=2	21	3	16	15.8	RPL27	1.90108e+06	1.02626e+06	291152	4.29925e+06	2.92474e+06	2.12071e+06
Ataxin-2-like protein OS=Homo sapiens OX=9606 GN=ATXN2L PE=1 SV=2	11	8	16	113.3	ATXN2L	1.04923e+06	351512	139767	539810	445568	387629
ATP-binding cassette sub-family F member 1 OS=Homo sapiens OX=9606 GN=ABCF1 PE=1 SV=2	8	5	16	95.9	ABCF1	528869	165383	59410.5	354650	402464	984054
Chloride intracellular channel protein 1 OS=Homo sapiens OX=9606 GN=CLIC1 PE=1 SV=4	23	4	16	26.9	CLIC1	3.58732e+06	102933	78958	257347	180130	139389
Coatomer subunit delta OS=Homo sapiens OX=9606 GN=ARCN1 PE=1 SV=1	9	4	16	57.2	ARCN1	645872	340625	164764	551375	277801	293877
Dihydropyrimidinase-related protein 2 OS=Homo sapiens OX=9606 GN=DPYSL2 PE=1 SV=1	11	5	16	62.3	DPYSL2	223322	210676	167685	496457	312693	345392
E3 ubiquitin-protein ligase ZNF598 OS=Homo sapiens OX=9606 GN=ZNF598 PE=1 SV=1	7	5	16	98.6	ZNF598	551954	205853	176873	399702	318995	225978
ELAV-like protein 1 OS=Homo sapiens OX=9606 GN=ELAVL1 PE=1 SV=2	16	5	16	36.1	ELAVL1	1.97532e+06	1.49148e+06	568046	1.3576e+06	1.2388e+06	1.41069e+06
Eukaryotic initiation factor 4A-III OS=Homo sapiens OX=9606 GN=EIF4A3 PE=1 SV=4	14	5	16	46.8	EIF4A3	741841	567661	223485	832739	694406	838018
Exosome component 10 OS=Homo sapiens OX=9606 GN=EXOSC10 PE=1 SV=2	6	5	16	100.8	EXOSC10	307122	163991	59190.9	443159	383155	407850
Extended synaptotagmin-2 OS=Homo sapiens OX=9606 GN=ESYT2 PE=1 SV=1	10	6	16	93.9		1.13516e+07	3.5948e+06	1.41096e+06	5.53623e+06	4.65968e+06	6.07427e+06
F-actin-capping protein subunit alpha OS=Homo sapiens OX=9606 GN=CAPZA2 PE=1 SV=1	23	3	16	16.7		160531	105570	88755.4	185930	167760	117602
Fatty acyl-CoA reductase 1 OS=Homo sapiens OX=9606 GN=FAR1 PE=1 SV=1	9	4	16	59.3	FAR1	570063	526670	282281	639097	565951	681462
Glycogen synthase kinase-3 beta OS=Homo sapiens OX=9606 GN=GSK3B PE=1 SV=2	16	4	16	46.7	GSK3B	585063	381433	196882	549348	532670	565085
Guanine nucleotide-binding protein G(I)/G(S)/G(T) subunit beta-1 OS=Homo sapiens OX=9606 GN=GNB1 PE=1 SV=3	16	4	16	37.4	GNB1	573321	556953	167562	765645	380754	289713
Heterogeneous nuclear ribonucleoprotein A/B OS=Homo sapiens OX=9606 GN=HNRNPAB PE=1 SV=1	11	3	16	35.7		1.44191e+06	764254	305193	1.56428e+06	1.06294e+06	733417
Mitochondrial glutamate carrier 1 (Fragment) OS=Homo sapiens OX=9606 GN=SLC25A22 PE=1 SV=2	21	4	16	20.3		392514	204773	195814	676607	543185	521508
NAD(P) transhydrogenase, mitochondrial OS=Homo sapiens OX=9606 GN=NNT PE=1 SV=3	9	7	16	113.8	NNT	250878	158197	115956	383551	316640	438441
NADH dehydrogenase [ubiquinone] flavoprotein 2, mitochondrial OS=Homo sapiens OX=9606 GN=NDUFV2 PE=1 SV=1	17	4	16	27.9		415646	157631	45163.8	279391	245705	531025
Nuclear pore complex protein Nup153 OS=Homo sapiens OX=9606 GN=NUP153 PE=1 SV=2	5	5	16	153.8	NUP153	404299	104328	39989.6	165104	147803	102683
Plasminogen activator inhibitor 1 RNA-binding protein OS=Homo sapiens OX=9606 GN=SERBP1 PE=1 SV=2	17	5	16	44.9	SERBP1	1.4509e+06	319280	340980	2.71942e+06	1.93767e+06	1.12556e+06
Pre-mRNA-processing factor 31 OS=Homo sapiens OX=9606 GN=PRPF31 PE=1 SV=1	17	5	16	54.7		84328	78188.1	41994.3	202215	174755	189503
Probable ATP-dependent RNA helicase DDX41 OS=Homo sapiens OX=9606 GN=DDX41 PE=1 SV=2	11	6	16	69.8	DDX41	437789	322015	120395	439474	374106	424241
Probable helicase with zinc finger domain OS=Homo sapiens OX=9606 GN=HELZ PE=1 SV=2	5	8	16	218.8	HELZ	328425	289749	86380	329134	319463	526728
Programmed cell death 6-interacting protein OS=Homo sapiens OX=9606 GN=PDCD6IP PE=1 SV=1	15	9	16	96	PDCD6IP	1.57325e+06	193000	93212.7	262688	197568	313721
Proliferating cell nuclear antigen OS=Homo sapiens OX=9606 GN=PCNA PE=1 SV=1	36	7	16	28.8	PCNA	611417	341800	111457	294486	324963	447564
Protein FAM98A OS=Homo sapiens OX=9606 GN=FAM98A PE=1 SV=1	20	5	16	34.4		785793	268990	137318	521945	277186	189923
Ras-related protein Rab-32 OS=Homo sapiens OX=9606 GN=RAB32 PE=1 SV=3	18	3	16	25	RAB32	223723	299289	99191.6	550145	301128	248228
Ras-related protein Rap-1b OS=Homo sapiens OX=9606 GN=RAP1B PE=1 SV=1	31	5	16	20.8	RAP1B	2.24528e+06	1.89727e+06	765080	1.79027e+06	1.28111e+06	2.11139e+06
RuvB-like 2 OS=Homo sapiens OX=9606 GN=RUVBL2 PE=1 SV=3	19	9	16	51.1	RUVBL2	1.43419e+06	321490	236270	627928	610088	486343
Segment polarity protein dishevelled homolog DVL-3 OS=Homo sapiens OX=9606 GN=DVL3 PE=1 SV=2	7	4	16	78	DVL3	219609	192910	108584	391780	280485	192025
SHC-transforming protein 1 OS=Homo sapiens OX=9606 GN=SHC1 PE=1 SV=4	13	5	16	62.8	SHC1	161594	87312.9	80168.1	953442	698461	560433
Transforming growth factor beta-1-induced transcript 1 protein OS=Homo sapiens OX=9606 GN=TGFB1I1 PE=1 SV=2	21	6	16	49.8	TGFB1I1	509293	597700	202087	586197	339566	302727
Transketolase OS=Homo sapiens OX=9606 GN=TKT PE=1 SV=3	13	6	16	67.8	TKT	742807	175049	151209	599057	376629	499481
Y-box-binding protein 1 OS=Homo sapiens OX=9606 GN=YBX1 PE=1 SV=3	30	4	16	35.9	YBX1	1.77827e+06	736882	341448	2.03314e+06	1.44399e+06	599985
40S ribosomal protein S17 OS=Homo sapiens OX=9606 PE=3 SV=2	8	4	15	64.5		655516	396767	122785	1.66826e+06	1.09758e+06	2.63479e+06
60S ribosomal protein L31 (Fragment) OS=Homo sapiens OX=9606 GN=RPL31 PE=1 SV=1	36	4	15	12.8		2.35857e+06	1.26253e+06	668584	5.8676e+06	4.00597e+06	4.13729e+06
Alkyldihydroxyacetonephosphate synthase, peroxisomal OS=Homo sapiens OX=9606 GN=AGPS PE=1 SV=1	13	7	15	72.9	AGPS	491878	465121	882661	881501	752062	876332
Beta-1-syntrophin OS=Homo sapiens OX=9606 GN=SNTB1 PE=1 SV=3	14	5	15	58	SNTB1	284372	220439	99744.6	284242	230299	294756
Catenin alpha-2 OS=Homo sapiens OX=9606 GN=CTNNA2 PE=1 SV=5	6	5	15	105.2	CTNNA2	416724	187066	45247.9	375601	447862	833089
CCN family member 1 OS=Homo sapiens OX=9606 GN=CCN1 PE=1 SV=1	12	4	15	42	CYR61	698742	494426	231078	1.32571e+06	929431	1.06965e+06
Cell division cycle and apoptosis regulator protein 1 (Fragment) OS=Homo sapiens OX=9606 GN=CCAR1 PE=1 SV=1	6	6	15	120.4	CCAR1	567304	279443	122692	487824	422685	507784
Cyclin-dependent kinase 17 OS=Homo sapiens OX=9606 GN=CDK17 PE=1 SV=2	12	6	15	59.5	CDK17	1.50069e+06	1.49243e+06	369102	1.35599e+06	1.17679e+06	2.25163e+06
Dystrophin OS=Homo sapiens OX=9606 GN=DMD PE=1 SV=1	7	6	15	128.9		368062	250652	170851	612034	419124	334967
HLA class I histocompatibility antigen, B alpha chain OS=Homo sapiens OX=9606 GN=HLA-B PE=1 SV=3	14	4	15	40.4	HLA-B	336397	278332	108144	640244	492716	331600
Importin-5 OS=Homo sapiens OX=9606 GN=IPO5 PE=1 SV=4	8	7	15	123.6	IPO5	665053	278053	223116	667771	508597	536653
Junction plakoglobin OS=Homo sapiens OX=9606 GN=JUP PE=1 SV=3	7	5	15	81.7	JUP	508354	515546	302280	450362	395250	444943
La-related protein 4 OS=Homo sapiens OX=9606 GN=LARP4 PE=1 SV=3	12	6	15	80.5	LARP4	421528	200573	79762.6	753714	545742	797979
Mitochondrial carrier homolog 2 OS=Homo sapiens OX=9606 GN=MTCH2 PE=1 SV=1	27	6	15	33.3	MTCH2	864957	458187	43809.5	258197	246618	1.0609e+06
Mothers against decapentaplegic homolog 3 OS=Homo sapiens OX=9606 GN=SMAD3 PE=1 SV=1	8	3	15	48.1	SMAD3	1.11964e+06	847802	223824	1.01915e+06	989229	1.56846e+06
NADH dehydrogenase [ubiquinone] iron-sulfur protein 3, mitochondrial OS=Homo sapiens OX=9606 GN=NDUFS3 PE=1 SV=1	20	4	15	30.2	NDUFS3	599197	278210	71018.5	450421	446744	426694
Nucleoside diphosphate kinase B OS=Homo sapiens OX=9606 GN=NME2 PE=1 SV=1	42	6	15	17.3	NME2; NME1-NME2	4.94004e+06	192429	86247.6	388312	309687	460075
Partitioning defective 3 homolog B OS=Homo sapiens OX=9606 GN=PARD3B PE=1 SV=2	5	5	15	132.4	PARD3B	280334	244360	114621	297738	283210	349164
Plasma membrane calcium-transporting ATPase 1 OS=Homo sapiens OX=9606 GN=ATP2B1 PE=1 SV=4	6	6	15	134.6		193060	40162	85917.2	283830	174582	100549
Protein argonaute-2 OS=Homo sapiens OX=9606 GN=AGO2 PE=1 SV=3	6	5	15	97.1	AGO2; EIF2C2	1.34937e+06	1.14768e+06	126026	852148	1.43731e+06	1.49076e+06
Protein mono-ADP-ribosyltransferase PARP4 OS=Homo sapiens OX=9606 GN=PARP4 PE=1 SV=3	3	5	15	192.5	PARP4	409650	221788	123528	284536	240946	427625
Ral GTPase-activating protein subunit alpha-1 OS=Homo sapiens OX=9606 GN=RALGAPA1 PE=1 SV=1	3	7	15	280.2	RALGAPA1	53631.9	41355	29330.7	944894	754525	659594
Ras GTPase-activating protein nGAP OS=Homo sapiens OX=9606 GN=RASAL2 PE=1 SV=2	6	5	15	128.5	RASAL2	175168	184888	65927.7	372722	318171	315130
Ras-related protein Rap-1A OS=Homo sapiens OX=9606 GN=RAP1A PE=1 SV=1	32	5	15	21	RAP1A	34682.2			7986.32
Reticulon-4 OS=Homo sapiens OX=9606 GN=RTN4 PE=1 SV=2	5	3	15	129.9	RTN4	1.10108e+06	1.04045e+06	529605	1.36531e+06	952937	1.1801e+06
Signal recognition particle receptor subunit beta OS=Homo sapiens OX=9606 GN=SRPRB PE=1 SV=3	20	5	15	29.7	SRPRB	520701	233794	148438	539883	299242	256904
Small monomeric GTPase (Fragment) OS=Homo sapiens OX=9606 GN=RALA PE=1 SV=1	24	3	15	18.4		584536	387783	201895	739598	617040	761113
Solute carrier family 35 member E1 OS=Homo sapiens OX=9606 GN=SLC35E1 PE=1 SV=2	12	2	15	44.7	SLC35E1	347696	297119	115745	245136	240410	234950
Structural maintenance of chromosomes protein 4 OS=Homo sapiens OX=9606 GN=SMC4 PE=1 SV=2	8	8	15	147.1	SMC4	553192	249151	106944	546585	389166	311141
Thyroid hormone receptor-associated protein 3 OS=Homo sapiens OX=9606 GN=THRAP3 PE=1 SV=2	6	5	15	108.6	THRAP3	959314	502270	172629	1.21987e+06	706394	835927
Ubiquitin-like modifier-activating enzyme 1 OS=Homo sapiens OX=9606 GN=UBA1 PE=1 SV=3	11	8	15	117.8	UBA1	476769	100874	49612.6	174225	219712	286785
Uncharacterized protein OS=Homo sapiens OX=9606 PE=3 SV=1	43	3	15	10.4		702721	601028	150341	663112	459145	814278
26S proteasome non-ATPase regulatory subunit 3 OS=Homo sapiens OX=9606 GN=PSMD3 PE=1 SV=2	9	4	14	60.9	PSMD3	390938	244278	63741.8	458135	270379	239945
39S ribosomal protein L37, mitochondrial OS=Homo sapiens OX=9606 GN=MRPL37 PE=1 SV=1	9	4	14	54.9	MRPL37	721625	459344	142493	779142	684985	506483
40S ribosomal protein S19 (Fragment) OS=Homo sapiens OX=9606 GN=RPS19 PE=1 SV=1	37	4	14	8.2		118668		19969.7	110613	227115	974606
40S ribosomal protein S27-like OS=Homo sapiens OX=9606 GN=RPS27L PE=1 SV=3	25	2	14	9.5	RPS27L	3.43514e+06	3.58074e+06	1.06344e+06	5.52635e+06	3.37708e+06	3.90094e+06
60S ribosomal protein L18a (Fragment) OS=Homo sapiens OX=9606 GN=RPL18A PE=1 SV=1	38	5	14	16.7		1.60713e+06	930954	244456	2.34575e+06	1.85645e+06	2.30172e+06
ADP-ribosylation factor GTPase-activating protein 1 OS=Homo sapiens OX=9606 GN=ARFGAP1 PE=1 SV=2	13	5	14	44.6	ARFGAP1	454380	513778	136601	1.09767e+06	903410	727863
Albumin OS=Homo sapiens OX=9606 GN=ALB PE=1 SV=2	4	3	14	69.3	ALB	822158	325451	274286	296129	390800	765660
Aldehyde dehydrogenase family 3 member B1 OS=Homo sapiens OX=9606 GN=ALDH3B1 PE=1 SV=1	12	5	14	51.8	ALDH3B1	579260	501131	244619	954791	1.24149e+06	1.30455e+06
Aurora kinase B OS=Homo sapiens OX=9606 GN=AURKB PE=1 SV=3	10	3	14	39.3	AURKB	285525	227347	137185	219687	194527	188120
Carbohydrate sulfotransferase 14 OS=Homo sapiens OX=9606 GN=CHST14 PE=1 SV=2	10	4	14	43	CHST14	273779	297061	126684	497929	399672	476574
Cyclin-dependent kinase 1 OS=Homo sapiens OX=9606 GN=CDK1 PE=1 SV=3	14	4	14	34.1	CDK1	976646	670617	292669	1.08094e+06	852327	1.01909e+06
Developmentally-regulated GTP-binding protein 1 OS=Homo sapiens OX=9606 GN=DRG1 PE=1 SV=1	19	5	14	40.5	DRG1	386483	117407	47389.5	273955	281706	417003
E3 ubiquitin-protein ligase DTX3L OS=Homo sapiens OX=9606 GN=DTX3L PE=1 SV=1	6	4	14	83.5	DTX3L	333104	223265	138445	531055	407026	267650
EH domain-containing protein 4 OS=Homo sapiens OX=9606 GN=EHD4 PE=1 SV=1	9	4	14	61.1	EHD4	418559	408068	244040	710318	522834	512461
Eukaryotic translation initiation factor 3 subunit B OS=Homo sapiens OX=9606 GN=EIF3B PE=1 SV=3	7	5	14	92.4	EIF3B	340151	616594	187851	825248	781280	810611
Galactokinase OS=Homo sapiens OX=9606 GN=GALK1 PE=1 SV=1	12	4	14	42.2	GALK1	498048	224240	84000.7	520185	559008	381278
Helix-destabilizing protein OS=Homo sapiens OX=9606 GN=HNRNPA1 PE=1 SV=2	20	4	14	33.1		818185	336874	146834	1.36223e+06	1.31843e+06	638675
HLA class I antigen OS=Homo sapiens OX=9606 GN=HLA-A PE=1 SV=1	10	3	14	40.9	HLA-A; LOC100507703	347126	246521	172730	678578	607500	401111
KN motif and ankyrin repeat domain-containing protein 1 OS=Homo sapiens OX=9606 GN=KANK1 PE=1 SV=3	3	3	14	147.2	KANK1	44529.3	27042	23324.5	72169.8	80547.1	93825
Macrophage migration inhibitory factor OS=Homo sapiens OX=9606 GN=MIF PE=1 SV=4	10	1	14	12.5	MIF	416422	334643	157370	312483	300556	688940
Mitogen-activated protein kinase 1 OS=Homo sapiens OX=9606 GN=MAPK1 PE=1 SV=3	12	4	14	41.4	MAPK1	2.60188e+06	1.58107e+06	611704	6.52629e+06	4.1801e+06	4.54622e+06
Nuclear pore complex protein Nup155 OS=Homo sapiens OX=9606 GN=NUP155 PE=1 SV=1	4	3	14	155.1	NUP155	218701	116163	51567.5	141297	116212	96217.4
Phosphoenolpyruvate carboxykinase [GTP], mitochondrial OS=Homo sapiens OX=9606 GN=PCK2 PE=1 SV=4	12	6	14	70.7		398831	100791	25280.2	169979	123581	121594
Pre-mRNA-processing factor 6 OS=Homo sapiens OX=9606 GN=PRPF6 PE=1 SV=1	7	6	14	106.9	PRPF6	583766	287382	162751	695127	555430	654761
Protein arginine N-methyltransferase 5 OS=Homo sapiens OX=9606 GN=PRMT5 PE=1 SV=4	14	8	14	72.6	PRMT5	4.92741e+06	280658	158410	294333	268043	405434
Protein Hook homolog 2 OS=Homo sapiens OX=9606 GN=HOOK2 PE=1 SV=3	8	4	14	83.2	HOOK2	523204	560935	208993	625144	538375	503103
Protein lin-7 homolog C OS=Homo sapiens OX=9606 GN=LIN7C PE=1 SV=1	19	4	14	21.8	LIN7C	994955	1.03053e+06	371323	1.22121e+06	818686	887361
Protein mono-ADP-ribosyltransferase PARP9 OS=Homo sapiens OX=9606 GN=PARP9 PE=1 SV=2	9	6	14	96.3	PARP9	529368	622076	160653	894701	622374	718259
Protein MTO1 homolog, mitochondrial OS=Homo sapiens OX=9606 GN=MTO1 PE=1 SV=2	9	6	14	79.9	MTO1	1.39396e+06	573518	192115	916944	823429	1.39406e+06
Protein Shroom3 OS=Homo sapiens OX=9606 GN=SHROOM3 PE=1 SV=2	4	7	14	216.7	SHROOM3	5.03138e+06	1.16306e+06	561488	1.31934e+06	798321	1.127e+06
Protein TANC2 OS=Homo sapiens OX=9606 GN=TANC2 PE=1 SV=3	3	5	14	219.5	TANC2	177523	190904	88937.2	276707	240690	324597
PTB domain-containing engulfment adapter protein 1 OS=Homo sapiens OX=9606 GN=GULP1 PE=1 SV=1	19	5	14	34.5	GULP1	47871.4	77001.1	21708.9	2.32885e+06	1.60685e+06	995507
Ras GTPase-activating-like protein IQGAP2 (Fragment) OS=Homo sapiens OX=9606 GN=IQGAP2 PE=1 SV=1	2	3	14	160.2		157471
Ras-related protein Rab-11A OS=Homo sapiens OX=9606 GN=RAB11A PE=1 SV=3	16	3	14	24.4	RAB11A	1.01635e+06	524727	233368	735354	580517	819258
Replication factor C subunit 2 OS=Homo sapiens OX=9606 GN=RFC2 PE=1 SV=3	11	3	14	39.1	RFC2	1.23061e+06	937874	469628	1.58879e+06	1.32319e+06	1.13347e+06
Replication factor C subunit 3 OS=Homo sapiens OX=9606 GN=RFC3 PE=1 SV=2	15	5	14	40.5	RFC3	631659	588557	289721	1.00882e+06	690557	464082
Rho guanine nucleotide exchange factor 40 OS=Homo sapiens OX=9606 GN=ARHGEF40 PE=1 SV=3	6	7	14	164.6	ARHGEF40	155180	190134	88877.2	330783	207693	242090
Ribose-phosphate pyrophosphokinase 1 OS=Homo sapiens OX=9606 GN=PRPS1 PE=1 SV=2	14	4	14	31.4		724600	561737	106357	905103	822541	1.42397e+06
Segment polarity protein dishevelled homolog DVL-2 OS=Homo sapiens OX=9606 GN=DVL2 PE=1 SV=1	7	4	14	78.9	DVL2	64065.6	59522	48964.2	90523.5	140377	80220.7
Sequestosome-1 OS=Homo sapiens OX=9606 GN=SQSTM1 PE=1 SV=1	13	3	14	47.7	SQSTM1	770900	156773	88861.6	403458	679409	539996
Serine/threonine-protein kinase 4 OS=Homo sapiens OX=9606 GN=STK4 PE=1 SV=2	14	5	14	55.6	STK4	200829	72670.4	6483.71	32422.4	51259.7	293447
SH3KBP1 binding protein 1, isoform CRA_c OS=Homo sapiens OX=9606 GN=SHKBP1 PE=1 SV=1	8	4	14	73.7	SHKBP1	321599	270194	91028.8	189703	172906	232871
Sorting nexin-1 OS=Homo sapiens OX=9606 GN=SNX1 PE=1 SV=3	10	4	14	59	SNX1	321896	296973	139505	412580	363101	469882
T-complex protein 1 subunit epsilon OS=Homo sapiens OX=9606 GN=CCT5 PE=1 SV=1	14	8	14	57.1	CCT5	2.53854e+06	260180	249002	387336	350398	357536
TP53-binding protein 1 OS=Homo sapiens OX=9606 GN=TP53BP1 PE=1 SV=2	10	12	14	208.9	TP53BP1	1.63244e+06			16353.6	8266.14
Transducin beta-like protein 2 OS=Homo sapiens OX=9606 GN=TBL2 PE=1 SV=1	11	4	14	49.8	TBL2	535805	226748	99906.8	675509	426119	364387
Vang-like protein 1 OS=Homo sapiens OX=9606 GN=VANGL1 PE=1 SV=1	11	4	14	59.9	VANGL1	65770	77352.9	48055.3	517245	356909	261090
YLP motif-containing protein 1 (Fragment) OS=Homo sapiens OX=9606 GN=YLPM1 PE=1 SV=1	5	4	14	180.2		230869	263828	18554.5	219768	165694	278047
[Pyruvate dehydrogenase (acetyl-transferring)] kinase isozyme 1, mitochondrial OS=Homo sapiens OX=9606 GN=PDK1 PE=1 SV=1	10	4	13	49.2	PDK1	845953	597646	173926	221334	173847	361522
[Pyruvate dehydrogenase (acetyl-transferring)] kinase isozyme 3, mitochondrial OS=Homo sapiens OX=9606 GN=PDK3 PE=1 SV=1	13	4	13	46.9	PDK3	923460	934141	301143	364130	288114	426668
39S ribosomal protein L14, mitochondrial OS=Homo sapiens OX=9606 GN=MRPL14 PE=1 SV=1	35	4	13	15.9	MRPL14	401120	472511	78885.8	512254	533299	855533
40S ribosomal protein S7 OS=Homo sapiens OX=9606 GN=RPS7 PE=1 SV=1	15	3	13	22.1	RPS7	3.77133e+06	2498138	726541	4.41105e+06	3.516e+06	5.37216e+06
Adenosylhomocysteinase OS=Homo sapiens OX=9606 GN=AHCY PE=1 SV=4	24	9	13	47.7	AHCY	3.99376e+06	125362	82810.3	243205	175516	163514
AIR carboxylase (Fragment) OS=Homo sapiens OX=9606 GN=PAICS PE=1 SV=1	14	6	13	45.6		6.41278e+06	310771	190405	406451	303058	381999
Annexin A1 OS=Homo sapiens OX=9606 GN=ANXA1 PE=1 SV=2	28	7	13	38.7	ANXA1	3.27885e+06	338362	131186	676561	516744	746777
ARF GTPase-activating protein GIT1 OS=Homo sapiens OX=9606 GN=GIT1 PE=1 SV=1	9	5	13	76.8		479951	274758	129192	396800	358923	381686
BMP-2-inducible protein kinase OS=Homo sapiens OX=9606 GN=BMP2K PE=1 SV=2	7	6	13	129.1	BMP2K	77000	18903.5		169092	251892	311632
Chondroitin sulfate glucuronyltransferase OS=Homo sapiens OX=9606 GN=CHPF2 PE=2 SV=2	7	4	13	85.9	CHPF2	372692	488817	252816	461861	395294	389851
Chondroitin sulfate synthase 2 OS=Homo sapiens OX=9606 GN=CHPF PE=1 SV=2	6	4	13	85.4	CHPF	494865	399522	170243	251114	294041	341964
Cytochrome c oxidase subunit 2 OS=Homo sapiens OX=9606 GN=MT-CO2 PE=1 SV=1	15	4	13	25.5	COX2	576328	474491	28059.5	440575	370057	398263
Cytohesin-2 OS=Homo sapiens OX=9606 GN=CYTH2 PE=1 SV=2	6	2	13	46.5	CYTH2	250480	162571	13039.7	96331.8	97123.5	223617
Delta-1-pyrroline-5-carboxylate synthase OS=Homo sapiens OX=9606 GN=ALDH18A1 PE=1 SV=2	8	5	13	87.2	ALDH18A1	649250	322756	86844.3	296432	286636	512576
Disks large homolog 1 OS=Homo sapiens OX=9606 GN=DLG1 PE=1 SV=1	7	4	13	63		617603	568301	291964	606594	613985	607953
E3 SUMO-protein ligase RanBP2 OS=Homo sapiens OX=9606 GN=RANBP2 PE=1 SV=2	4	8	13	358	RANBP2	572834	81464.8	34564.1	178452	181577	47109
E3 ubiquitin/ISG15 ligase TRIM25 OS=Homo sapiens OX=9606 GN=TRIM25 PE=1 SV=1	14	5	13	51		758513	224416	96929.5	982841	581140	585591
Endoplasmic reticulum resident protein 44 OS=Homo sapiens OX=9606 GN=ERP44 PE=1 SV=1	9	4	13	46.9	ERP44	1.07398e+06	951988	408764	928869	838294	1.20648e+06
Ephrin type-A receptor 2 OS=Homo sapiens OX=9606 GN=EPHA2 PE=1 SV=2	7	5	13	108.2	EPHA2	218783	195616	107759	368465	190535	274525
Eukaryotic translation initiation factor 2 subunit 1 OS=Homo sapiens OX=9606 GN=EIF2S1 PE=1 SV=3	16	4	13	36.1	EIF2S1	609575	283598	184025	803840	842087	712377
F-actin-capping protein subunit alpha-1 OS=Homo sapiens OX=9606 GN=CAPZA1 PE=1 SV=3	20	4	13	32.9	CAPZA1	1.00663e+06	400526	69440.7	494797	582561	847137
F-box-like/WD repeat-containing protein TBL1XR1 OS=Homo sapiens OX=9606 GN=TBL1XR1 PE=1 SV=1	7	3	13	55.6	TBL1XR1	380231	207622	37372.8	201535	150847	157107
Filamin A-interacting protein 1-like OS=Homo sapiens OX=9606 GN=FILIP1L PE=1 SV=2	4	4	13	130.3	FILIP1L	603864	685428	187745	396265	291712	337437
Four and a half LIM domains protein 2 OS=Homo sapiens OX=9606 GN=FHL2 PE=1 SV=3	18	4	13	32.2	FHL2	260291	310752	73690.2	282503	130958	229482
Fructosamine-3-kinase OS=Homo sapiens OX=9606 GN=FN3K PE=1 SV=1	18	5	13	35.1	FN3K	1.01241e+06	1.30783e+06	330104	1.32651e+06	946484	1.02296e+06
Glutaminase kidney isoform, mitochondrial OS=Homo sapiens OX=9606 GN=GLS PE=1 SV=1	6	3	13	73.4	GLS	465939	395036	234733	842195	593124	790999
G-rich sequence factor 1 OS=Homo sapiens OX=9606 GN=GRSF1 PE=1 SV=2	11	4	13	47.9	GRSF1	267678	247898	186034	785067	656765	638194
Guanine nucleotide-binding protein G(i) subunit alpha-2 OS=Homo sapiens OX=9606 GN=GNAI2 PE=1 SV=3	11	3	13	40.4	GNAI2	309176	125235	69833.9	322565	279865	235582
Heat shock 70 kDa protein 4L OS=Homo sapiens OX=9606 GN=HSPA4L PE=1 SV=1	8	5	13	91.9	HSPA4L	413503	61855.4	28757.1	109864	7973.73	132239
Heat shock protein 75 kDa, mitochondrial OS=Homo sapiens OX=9606 GN=TRAP1 PE=1 SV=3	14	7	13	80.1	TRAP1	1.332e+06	340160	212599	775930	714079	908229
Hermansky-Pudlak syndrome 6 protein OS=Homo sapiens OX=9606 GN=HPS6 PE=1 SV=1	8	5	13	82.9	HPS6	192275	120708	27487.6	133967	121632	302479
LEM domain-containing protein 2 OS=Homo sapiens OX=9606 GN=LEMD2 PE=1 SV=1	8	3	13	56.9	LEMD2	311183	225272	141354	392345	358173	304554
MICOS complex subunit MIC19 OS=Homo sapiens OX=9606 GN=CHCHD3 PE=1 SV=2	19	5	13	26.7		720707	461981	293431	758856	634469	358135
Peptidyl-prolyl cis-trans isomerase B OS=Homo sapiens OX=9606 GN=PPIB PE=1 SV=2	16	3	13	23.7	PPIB	670211	164012	55844.4	397201	342158	360706
Peptidyl-prolyl cis-trans isomerase FKBP8 OS=Homo sapiens OX=9606 GN=FKBP8 PE=1 SV=2	20	6	13	44.5	FKBP8	1.30774e+06	179138	75823.3	268315	217864	239836
Phosphoribosyl pyrophosphate synthase-associated protein 1 OS=Homo sapiens OX=9606 GN=PRPSAP1 PE=1 SV=2	26	6	13	39.4	PRPSAP1	300899	129936	51073.3	260476	344122	410328
Plasma membrane calcium-transporting ATPase 4 OS=Homo sapiens OX=9606 GN=ATP2B4 PE=1 SV=2	5	5	13	137.8	ATP2B4	27582.9		13299.8	71338.2	30151.4
Pleckstrin homology-like domain family B member 1 (Fragment) OS=Homo sapiens OX=9606 GN=PHLDB1 PE=1 SV=1	9	4	13	73.1		58629.1	50701.3	29678	141469	105407	112503
Poly(rC)-binding protein 2 (Fragment) OS=Homo sapiens OX=9606 GN=PCBP2 PE=1 SV=2	17	4	13	32		565474
Poly(rC)-binding protein 4 OS=Homo sapiens OX=9606 GN=PCBP4 PE=2 SV=1	17	6	13	41.5	PCBP4	150259	114296	67102.6	199471	118858	107835
Probable glutamate--tRNA ligase, mitochondrial OS=Homo sapiens OX=9606 GN=EARS2 PE=1 SV=2	15	7	13	58.7	EARS2	290354	234149	112096	426916	340377	284353
Protein phosphatase 1G OS=Homo sapiens OX=9606 GN=PPM1G PE=1 SV=1	17	7	13	59.2	PPM1G	568932	119851	63439.8	387282	310518	195406
Protein salvador homolog 1 OS=Homo sapiens OX=9606 GN=SAV1 PE=1 SV=2	8	3	13	44.6	SAV1	626426	639164	214134	483826	428181	520734
Protein transport protein Sec61 subunit alpha isoform 1 OS=Homo sapiens OX=9606 GN=SEC61A1 PE=1 SV=1	6	3	13	52.9	SEC61A1	372140	458438	102545	547799	306526	333295
Protein-L-isoaspartate O-methyltransferase domain-containing protein 1 OS=Homo sapiens OX=9606 GN=PCMTD1 PE=1 SV=1	18	4	13	32.1	PCMTD1	801369	1.15242e+06	225220	1.11088e+06	1.00152e+06	1.33608e+06
Protein-L-isoaspartate O-methyltransferase domain-containing protein 2 OS=Homo sapiens OX=9606 GN=PCMTD2 PE=1 SV=1	9	2	13	24.5		215180	161421	82032.4	241555	228354	166148
Putative GTP-binding protein 6 OS=Homo sapiens OX=9606 GN=GTPBP6 PE=2 SV=4	10	4	13	56.9		241606	323981	151069	642240	511683	662071
Retinol dehydrogenase 14 OS=Homo sapiens OX=9606 GN=RDH14 PE=1 SV=1	15	4	13	36.8	RDH14	169155	212405	89739.3	300601	231105	316906
RNA helicase OS=Homo sapiens OX=9606 GN=MOV10 PE=1 SV=1	7	6	13	107.1	MOV10	294603	205640	90195.4	358705	263061	257162
Serine/threonine-protein kinase TBK1 OS=Homo sapiens OX=9606 GN=TBK1 PE=1 SV=1	10	4	13	62.5		332670	141896	61316.5	298692	229321	228762
Serpin B6 OS=Homo sapiens OX=9606 GN=SERPINB6 PE=1 SV=3	14	4	13	42.6	SERPINB6	367095	220744	58643.7	289157	260517	439520
Serrate RNA effector molecule homolog OS=Homo sapiens OX=9606 GN=SRRT PE=1 SV=1	7	6	13	100.6	SRRT	599652	434061	158481	689971	644491	605028
Sideroflexin-1 OS=Homo sapiens OX=9606 GN=SFXN1 PE=1 SV=4	16	4	13	35.6	SFXN1	917662	195914	185537	489000	488783	379275
TBC1 domain family member 2A OS=Homo sapiens OX=9606 GN=TBC1D2 PE=1 SV=3	5	5	13	105.3	TBC1D2	460422	359871	234440	510829	411788	411324
Transmembrane protein 33 (Fragment) OS=Homo sapiens OX=9606 GN=TMEM33 PE=1 SV=1	14	3	13	25.2		1.24394e+06	1.43973e+06	431821	1.38074e+06	921283	1.56883e+06
TRIO and F-actin-binding protein OS=Homo sapiens OX=9606 GN=TRIOBP PE=1 SV=3	3	5	13	261.2	TRIOBP	234641	208709	156371	388381	358488	201002
Tyrosine-protein phosphatase non-receptor type 23 OS=Homo sapiens OX=9606 GN=PTPN23 PE=1 SV=1	4	4	13	178.9	PTPN23	454585	209540	105667	297094	315499	319213
Ubiquitin-associated protein 2 OS=Homo sapiens OX=9606 GN=UBAP2 PE=1 SV=1	9	6	13	117	UBAP2	509219	196481	144139	405110	344965	372306
V-type proton ATPase subunit H OS=Homo sapiens OX=9606 GN=ATP6V1H PE=1 SV=1	8	3	13	55.8	ATP6V1H	304352	152457	135443	321077	224307	272521
26S proteasome non-ATPase regulatory subunit 1 OS=Homo sapiens OX=9606 GN=PSMD1 PE=1 SV=2	4	4	12	105.8	PSMD1	517759	228969	114864	427490	307831	410413
26S proteasome regulatory subunit 4 OS=Homo sapiens OX=9606 GN=PSMC1 PE=1 SV=1	13	5	12	49.2	PSMC1	1.55078e+06	1.26558e+06	634964	1.72932e+06	1.34016e+06	1.77198e+06
3-hydroxyacyl-CoA dehydrogenase type-2 OS=Homo sapiens OX=9606 GN=HSD17B10 PE=1 SV=3	31	5	12	26.9	HSD17B10	430581	138247	66211.6	340948	210085	206836
40S ribosomal protein S26 OS=Homo sapiens OX=9606 GN=RPS26 PE=1 SV=3	21	2	12	13	RPS26; LOC101929876; RPS26P25	1.57444e+06	1.23928e+06	347031	5.13929e+06	3.9691e+06	4.39178e+06
5'-3' exoribonuclease 1 OS=Homo sapiens OX=9606 GN=XRN1 PE=1 SV=1	4	6	12	194	XRN1	121330	220158	32206.5	239889	228645	436643
60S ribosomal protein L30 OS=Homo sapiens OX=9606 GN=RPL30 PE=1 SV=2	32	3	12	12.8	RPL30	374001	108565	74364.3	437604	414705	359287
Ankycorbin OS=Homo sapiens OX=9606 GN=RAI14 PE=1 SV=2	7	6	12	110	RAI14	212400	182393	54508.5	220843	261065	248076
Arf-GAP with GTPase, ANK repeat and PH domain-containing protein 1 OS=Homo sapiens OX=9606 GN=AGAP1 PE=1 SV=1	6	6	12	116.5		173948	167819	93855.8	286249	225352	171488
Atlastin-3 OS=Homo sapiens OX=9606 GN=ATL3 PE=1 SV=1	4	1	12	58.7	ATL3	71312.5	74475.9	48757.3	147450	113740	116921
ATP-dependent DNA helicase Q1 OS=Homo sapiens OX=9606 GN=RECQL PE=1 SV=3	9	5	12	73.4	RECQL	250406	280901	57499.2	514727	205912	221131
Basement membrane-specific heparan sulfate proteoglycan core protein OS=Homo sapiens OX=9606 GN=HSPG2 PE=1 SV=4	2	7	12	468.5	HSPG2	309135	244490	53859.7	240217	206670	208474
Brain acid soluble protein 1 OS=Homo sapiens OX=9606 GN=BASP1 PE=1 SV=2	42	4	12	22.7	BASP1	138642	101090	133853	245190	214073	107852
Cadherin-2 OS=Homo sapiens OX=9606 GN=CDH2 PE=1 SV=4	4	3	12	99.7	CDH2	298306	230357	39436	251856	262570	392705
Calcium-binding mitochondrial carrier protein SCaMC-1 OS=Homo sapiens OX=9606 GN=SLC25A24 PE=1 SV=2	9	4	12	53.3	SLC25A24	280108	445430	155111	528587	468632	735773
Cell division cycle 5-like protein OS=Homo sapiens OX=9606 GN=CDC5L PE=1 SV=2	6	4	12	92.2	CDC5L	225228	127060	34514.7	191418	296805	365131
Coatomer subunit beta OS=Homo sapiens OX=9606 GN=COPB1 PE=1 SV=3	9	5	12	107.1	COPB1	616752	146861	113681	370552	303546	307194
Cytoskeleton-associated protein 5 OS=Homo sapiens OX=9606 GN=CKAP5 PE=1 SV=3	4	7	12	225.4	CKAP5	405549	162418	79372.5	240636	213150	206661
DISP complex protein LRCH3 OS=Homo sapiens OX=9606 GN=LRCH3 PE=1 SV=2	6	4	12	86	LRCH3	250369	152845	79885.9	182137	199809	201990
Divergent protein kinase domain 2A OS=Homo sapiens OX=9606 GN=DIPK2A PE=1 SV=1	13	5	12	49.5	C3orf58	474243	398873	142327	680261	512142	672468
DmX-like protein 2 OS=Homo sapiens OX=9606 GN=DMXL2 PE=1 SV=2	2	5	12	341.9		165722	127598	36126.5	277384	144987	135581
DNA repair protein RAD50 OS=Homo sapiens OX=9606 GN=RAD50 PE=1 SV=1	4	5	12	153.8	RAD50	363819	238285	62800.1	415061	274598	234848
DNA-directed RNA polymerase II subunit RPB1 OS=Homo sapiens OX=9606 GN=POLR2A PE=1 SV=2	6	7	12	217	POLR2A	550430	63657.5	41980.1	183636	127770	137708
Dolichyl-diphosphooligosaccharide--protein glycosyltransferase subunit 2 OS=Homo sapiens OX=9606 GN=RPN2 PE=1 SV=3	10	4	12	69.2	RPN2	547988	275916	34329.5	313073	257577	186116
Double-strand break repair protein MRE11 OS=Homo sapiens OX=9606 GN=MRE11 PE=1 SV=3	10	6	12	80.5	MRE11A; MRE11	398327	159455	53484.6	319178	215908	275551
Dynactin subunit 2 OS=Homo sapiens OX=9606 GN=DCTN2 PE=1 SV=4	18	5	12	44.2	DCTN2	486636	176319	64997	298939	260710	459911
E3 ubiquitin-protein ligase TRIM56 OS=Homo sapiens OX=9606 GN=TRIM56 PE=1 SV=3	6	4	12	81.4	TRIM56	576379	462928	158060	770798	740235	920279
FACT complex subunit SPT16 OS=Homo sapiens OX=9606 GN=SUPT16H PE=1 SV=1	7	6	12	119.8	SUPT16H	587034	108149	23742.7	386876	291007	322204
Fibronectin type III domain-containing protein 3B OS=Homo sapiens OX=9606 GN=FNDC3B PE=1 SV=2	5	4	12	132.8	FNDC3B	252375	134137	19621.3	131369	117229	277262
Heterogeneous nuclear ribonucleoprotein D0 (Fragment) OS=Homo sapiens OX=9606 GN=HNRNPD PE=1 SV=8	12	3	12	29.6		865587	82289.6	28726	403358	304758	135083
Heterogeneous nuclear ribonucleoprotein D-like OS=Homo sapiens OX=9606 GN=HNRNPDL PE=1 SV=3	8	3	12	46.4	HNRNPDL; HNRPDL	331291	329815	103874	929448	480311	400590
Insulin-like growth factor 2 mRNA-binding protein 2 OS=Homo sapiens OX=9606 GN=IGF2BP2 PE=1 SV=2	12	5	12	66.1	IGF2BP2	328638	29604.5	73219.4	290407	309819	419350
Intersectin-1 OS=Homo sapiens OX=9606 GN=ITSN1 PE=1 SV=1	9	8	12	129.9	ITSN1	9742.85			1.03149e+06	891475	674729
LIM and calponin homology domains-containing protein 1 (Fragment) OS=Homo sapiens OX=9606 GN=LIMCH1 PE=1 SV=1	8	5	12	103.4		237406	242701	119837	772979	684431	441594
LIM and SH3 domain protein 1 OS=Homo sapiens OX=9606 GN=LASP1 PE=1 SV=2	14	3	12	29.7	LASP1	611414	46264.9	46463.3	164849	137865	81755.3
Long-chain-fatty-acid--CoA ligase 3 OS=Homo sapiens OX=9606 GN=ACSL3 PE=1 SV=3	11	6	12	80.4	ACSL3	585830	385698	110973	710483	417227	317011
MAP7 domain-containing protein 1 OS=Homo sapiens OX=9606 GN=MAP7D1 PE=1 SV=1	3	2	12	92.8	MAP7D1	166228	134639	85050.8	382481	305245	340847
Metastasis-associated protein MTA2 OS=Homo sapiens OX=9606 GN=MTA2 PE=1 SV=1	9	5	12	75	MTA2	365548	170632	39109.4	328562	283457	225700
Microtubule cross-linking factor 1 OS=Homo sapiens OX=9606 GN=MTCL1 PE=1 SV=5	4	6	12	209.4	SOGA2; MTCL1	44297.6	70315.1	48430	170586	154590	164553
Microtubule-actin cross-linking factor 1, isoforms 1/2/3/5 OS=Homo sapiens OX=9606 GN=MACF1 PE=1 SV=1	1	5	12	856.3		107052	44243.8	3177.06	42530.2
Microtubule-associated protein 1A OS=Homo sapiens OX=9606 GN=MAP1A PE=1 SV=1	4	8	12	331.1	MAP1A	1.33855e+06					5616.2
Mitogen-activated protein kinase kinase kinase kinase 3 OS=Homo sapiens OX=9606 GN=MAP4K3 PE=1 SV=1	5	4	12	101.3	MAP4K3	408063	484623	163809	632941	487557	460292
Mothers against decapentaplegic homolog 2 (Fragment) OS=Homo sapiens OX=9606 GN=SMAD2 PE=1 SV=1	12	2	12	24.5		87564	20302.9	14687.5	28275	62802.7	119024
Non-specific serine/threonine protein kinase (Fragment) OS=Homo sapiens OX=9606 GN=RPS6KA4 PE=1 SV=5	5	3	12	78.3		329799	232097	122329	465782	345646	367455
Nuclear pore complex protein Nup214 OS=Homo sapiens OX=9606 GN=NUP214 PE=1 SV=2	6	7	12	213.5	NUP214	483781	122407	50661.3	163260	135249	172895
Nucleolysin TIAR OS=Homo sapiens OX=9606 GN=TIAL1 PE=1 SV=1	10	4	12	41.6	TIAL1	517845	537044	154384	635167	445627	579591
OTU domain-containing protein 4 OS=Homo sapiens OX=9606 GN=OTUD4 PE=1 SV=4	3	3	12	124	OTUD4	216786	140507	96996.8	307986	295931	289189
Phenylalanine--tRNA ligase OS=Homo sapiens OX=9606 GN=FARSA PE=1 SV=1	6	3	12	62.4		404577	284992	181168	516584	346731	180396
Protein disulfide-isomerase A3 (Fragment) OS=Homo sapiens OX=9606 GN=PDIA3 PE=1 SV=1	28	3	12	13.5		24001.2				14354.4
Protein NEDD1 OS=Homo sapiens OX=9606 GN=NEDD1 PE=1 SV=1	10	4	12	71.9	NEDD1	190163	133426	90071.8	142955	140469	60551.9
Protein transport protein Sec24B OS=Homo sapiens OX=9606 GN=SEC24B PE=1 SV=2	6	4	12	137.3	SEC24B	158137	74173.8	47690.6	122097	125552	57409.3
Ras-related C3 botulinum toxin substrate 2 OS=Homo sapiens OX=9606 GN=RAC2 PE=1 SV=1	17	3	12	21.4	RAC2	20739.4	17178	4300.08	35996.2	22599.5	47286.9
Ras-related protein Rab-5A OS=Homo sapiens OX=9606 GN=RAB5A PE=1 SV=2	17	3	12	23.6	RAB5A	194241	107117	105005	195099	74873.7	119175
Ras-related protein R-Ras2 OS=Homo sapiens OX=9606 GN=RRAS2 PE=1 SV=1	11	2	12	23.4	RRAS2	486847	501518	266244	640634	471787	529443
Regulator of chromosome condensation OS=Homo sapiens OX=9606 GN=RCC1 PE=1 SV=1	10	3	12	44.9	RCC1	1.12169e+06	782078	123536	623216	711107	1.56145e+06
Serine/threonine-protein kinase 3 OS=Homo sapiens OX=9606 GN=STK3 PE=1 SV=2	13	5	12	56.3	STK3	449512	299332	99103.3	261881	269688	386517
Serine/threonine-protein phosphatase 2A 65 kDa regulatory subunit A alpha isoform OS=Homo sapiens OX=9606 GN=PPP2R1A PE=1 SV=4	6	4	12	65.3	PPP2R1A	593649	340000	215087	635777	380117	303347
Single-stranded DNA-binding protein, mitochondrial OS=Homo sapiens OX=9606 GN=SSBP1 PE=1 SV=1	28	3	12	17.2	SSBP1	1.22144e+06	1.02573e+06	669256	1.58222e+06	1.34313e+06	1.48899e+06
SLAIN motif-containing protein 2 OS=Homo sapiens OX=9606 GN=SLAIN2 PE=1 SV=2	14	6	12	62.5	SLAIN2	635261	493036	177393	371766	269587	306691
Small nuclear ribonucleoprotein-associated proteins B and B' OS=Homo sapiens OX=9606 GN=SNRPB PE=1 SV=2	15	4	12	24.6	SNRPB	411926	158455	6687.93	150190	155823	352571
Sorting nexin-9 OS=Homo sapiens OX=9606 GN=SNX9 PE=1 SV=1	6	3	12	66.6	SNX9	316402	199997	42990.3	627620	534112	866788
Telomere-associated protein RIF1 OS=Homo sapiens OX=9606 GN=RIF1 PE=1 SV=2	8	12	12	274.3	RIF1	1.2568e+06			4610.66	24766.6
Transforming acidic coiled-coil-containing protein 3 OS=Homo sapiens OX=9606 GN=TACC3 PE=1 SV=1	12	9	12	90.3	TACC3	3.33185e+06	111441	95721.8	225011	184690	54465.3
Transforming growth factor beta-2 proprotein OS=Homo sapiens OX=9606 GN=TGFB2 PE=1 SV=1	8	3	12	47.7	TGFB2	324202	253512	113154	254810	261851	281341
Transmembrane protein 109 OS=Homo sapiens OX=9606 GN=TMEM109 PE=1 SV=1	5	1	12	26.2	TMEM109	453684	316015	198364	909447	472107	561800
TRPM8 channel-associated factor 1 OS=Homo sapiens OX=9606 GN=TCAF1 PE=1 SV=3	4	4	12	102.1	FAM115A; TCAF1	463751	360860	119246	402647	355045	409282
Tubulin gamma-1 chain OS=Homo sapiens OX=9606 GN=TUBG1 PE=1 SV=2	6	2	12	51.1	TUBG1	305763	134104	74661.7	233710	389130	281224
Uncharacterized protein (Fragment) OS=Homo sapiens OX=9606 PE=3 SV=1	3	4	12	121		992047	240961	125820	1.5478e+06	1.02212e+06	1.35025e+06
Vesicle-fusing ATPase (Fragment) OS=Homo sapiens OX=9606 PE=1 SV=3	14	5	12	48		609537	440646	89559.6	410376	329995	902184
Y-box-binding protein 3 OS=Homo sapiens OX=9606 GN=YBX3 PE=1 SV=4	26	5	12	40.1	CSDA; YBX3	559741	238753	37376	356908	297594	396649
40S ribosomal protein S30 OS=Homo sapiens OX=9606 GN=FAU PE=1 SV=1	19	2	11	6.6	FAU	1.25018e+06	308530	40283.3	889553	629347	1.37267e+06
5'-nucleotidase OS=Homo sapiens OX=9606 GN=NT5E PE=1 SV=1	9	4	11	63.3	NT5E	386592	297373	58476	424888	666707	602516
Adenylyl cyclase-associated protein 1 OS=Homo sapiens OX=9606 GN=CAP1 PE=1 SV=5	12	5	11	51.9	CAP1	1.39709e+06	261518	146264	419442	118692	85195.2
A-kinase anchor protein 8-like OS=Homo sapiens OX=9606 GN=AKAP8L PE=1 SV=4	5	3	11	71.6	AKAP8L	597510	405150	234162	604713	532062	419238
Aldehyde dehydrogenase family 1 member A3 OS=Homo sapiens OX=9606 GN=ALDH1A3 PE=1 SV=2	14	6	11	56.1	ALDH1A3	732681	178246	130298	614804	357778	545849
Aldehyde dehydrogenase X, mitochondrial OS=Homo sapiens OX=9606 GN=ALDH1B1 PE=1 SV=3	9	4	11	57.2	ALDH1B1	66959.8	57894.8	16474.7	52146.7	46642.1	84814.8
Ankyrin repeat and LEM domain-containing protein 2 OS=Homo sapiens OX=9606 GN=ANKLE2 PE=1 SV=4	3	3	11	104.1	ANKLE2	207176	247436	110871	237033	173725	209316
Apoptosis-inducing factor 1, mitochondrial OS=Homo sapiens OX=9606 GN=AIFM1 PE=1 SV=1	11	6	11	66.9	AIFM1	773674	183696	120350	614604	503358	388931
Basigin (Fragment) OS=Homo sapiens OX=9606 GN=BSG PE=1 SV=1	15	3	11	23.9		1.18616e+06	1.06332e+06	548106	1.67521e+06	1.47145e+06	1.56045e+06
BRISC complex subunit Abraxas 2 OS=Homo sapiens OX=9606 GN=ABRAXAS2 PE=1 SV=2	13	4	11	46.9	FAM175B; ABRAXAS2	128878	83242.6	18634.8	152246	132258	143708
Calcium load-activated calcium channel OS=Homo sapiens OX=9606 GN=TMCO1 PE=1 SV=2	9	2	11	27.1		508145	489135	117171	400959	360621	475710
Caseinolytic peptidase B protein homolog OS=Homo sapiens OX=9606 GN=CLPB PE=1 SV=1	7	4	11	78.7	CLPB	415754	258511	154729	352423	230925	121381
Cell division control protein 42 homolog OS=Homo sapiens OX=9606 GN=CDC42 PE=1 SV=2	20	3	11	21.2	CDC42	1.66279e+06	1.15041e+06	817608	2.2256e+06	1.53361e+06	1.17896e+06
Complex I-20kD OS=Homo sapiens OX=9606 GN=NDUFS7 PE=1 SV=1	18	3	11	19.8	NDUFS7	325147	173291	136362	417662	468462	343614
Contactin-associated protein 1 OS=Homo sapiens OX=9606 GN=CNTNAP1 PE=1 SV=1	3	4	11	156.2	CNTNAP1	111091	81349.1	44896.1	169312	172719	212652
Cytoplasmic polyadenylation element-binding protein 2 OS=Homo sapiens OX=9606 GN=CPEB2 PE=1 SV=1	5	4	11	105.5		20045.1	26704.7	11423.3	54426.2	58015.9	36999.6
Double-stranded RNA-binding protein Staufen homolog 1 (Fragment) OS=Homo sapiens OX=9606 GN=STAU1 PE=1 SV=1	28	5	11	22.5	STAU1		7065.02		9838.64	9650.35	30846.7
E3 ubiquitin-protein ligase TRIM22 OS=Homo sapiens OX=9606 GN=TRIM22 PE=1 SV=1	8	3	11	56.9	TRIM22	436389	243036	89211.8	545669	494890	456289
Elongin-C OS=Homo sapiens OX=9606 GN=ELOC PE=1 SV=1	9	1	11	12.5	TCEB1; ELOC	341618	287132	79524.2	218465	265351	330457
Eukaryotic translation initiation factor 3 subunit D OS=Homo sapiens OX=9606 GN=EIF3D PE=1 SV=1	13	6	11	63.9	EIF3D	507959	428833	59179.1	358069	172430	599404
Exportin-2 OS=Homo sapiens OX=9606 GN=CSE1L PE=1 SV=3	10	8	11	110.3	CSE1L	1.37114e+06	780105	471060	1.20174e+06	831874	1.11277e+06
Gamma-tubulin complex component 3 OS=Homo sapiens OX=9606 GN=TUBGCP3 PE=1 SV=2	7	4	11	103.5	TUBGCP3	78440.3	61409.9	32295.7	120741	117802	121428
GTP-binding nuclear protein Ran OS=Homo sapiens OX=9606 GN=RAN PE=1 SV=1	10	2	11	26.2	RAN	6.58141e+06	375778	295190	779766	441964	555980
Guanine nucleotide-binding protein G(s) subunit alpha isoforms XLas OS=Homo sapiens OX=9606 GN=GNAS PE=1 SV=2	6	5	11	111	GNAS	1.22408e+06	909818	123722	724348	1.11937e+06	1.25028e+06
Heat shock 70 kDa protein 14 OS=Homo sapiens OX=9606 GN=HSPA14 PE=1 SV=1	16	8	11	54.8	HSPA14	3.12753e+06	54251.3	19365.9	63228.5	77217.6	104869
High mobility group protein HMG-I/HMG-Y OS=Homo sapiens OX=9606 GN=HMGA1 PE=1 SV=3	34	5	11	11.7	HMGA1	6.13154e+06	301300	64570.7	686452	427004	580625
Hyaluronan mediated motility receptor OS=Homo sapiens OX=9606 GN=HMMR PE=1 SV=2	15	8	11	84	HMMR	657847	231698	87886	351381	249914	219546
Hydroxysteroid dehydrogenase-like protein 2 OS=Homo sapiens OX=9606 GN=HSDL2 PE=1 SV=1	7	3	11	45.4	HSDL2	234382	154685	137619	380762	325466	246905
Interferon regulatory factor 2-binding protein 2 OS=Homo sapiens OX=9606 GN=IRF2BP2 PE=1 SV=2	12	3	11	61	IRF2BP2	278018	46675.5	19098.8	70252.1	78029.7	82956
Kinase D-interacting substrate of 220 kDa OS=Homo sapiens OX=9606 GN=KIDINS220 PE=1 SV=3	3	5	11	196.4	KIDINS220	122462	99200.3	41663.5	192012	191097	129648
Leucine-rich repeat-containing protein 14 OS=Homo sapiens OX=9606 GN=LRRC14 PE=1 SV=1	8	3	11	54.5	LRRC14	285091	255411	161675	380216	236379	289702
Lon protease homolog 2, peroxisomal OS=Homo sapiens OX=9606 GN=LONP2 PE=1 SV=1	7	5	11	94.6	LONP2	227331	160288	35338.7	247485	202515	368538
Methylosome protein 50 OS=Homo sapiens OX=9606 GN=WDR77 PE=1 SV=1	15	4	11	36.7	WDR77	5.4554e+06	142156	66053.2	130475	127955	140108
Myotubularin-related protein 5 OS=Homo sapiens OX=9606 GN=SBF1 PE=1 SV=4	3	4	11	208.3		106293	68600.6	29122.2	133606	106956	122681
Nicastrin OS=Homo sapiens OX=9606 GN=NCSTN PE=1 SV=2	3	2	11	78.4	NCSTN	230124	176350	70154.9	147301	121327	215368
OCIA domain-containing protein 2 OS=Homo sapiens OX=9606 GN=OCIAD2 PE=1 SV=1	20	3	11	16.9	OCIAD2	245600	109489	40127	162951	186742	488350
Oxysterol-binding protein-related protein 3 OS=Homo sapiens OX=9606 GN=OSBPL3 PE=1 SV=1	7	4	11	101.2	OSBPL3	900723	149775	102493	324152	239719	234525
Peroxiredoxin-4 (Fragment) OS=Homo sapiens OX=9606 GN=PRDX4 PE=1 SV=1	22	4	11	18.3		372439	71701.2	16225.8	125143	93856	105386
Phosphoglucomutase-like protein 5 OS=Homo sapiens OX=9606 GN=PGM5 PE=1 SV=2	11	5	11	62.2	PGM5	926180	907267	376502	680215	469754	703350
Pleckstrin homology domain-containing family A member 5 OS=Homo sapiens OX=9606 GN=PLEKHA5 PE=1 SV=1	5	4	11	127.4	PLEKHA5	170523	141837	37834.1	269210	210605	247006
Procollagen-lysine,2-oxoglutarate 5-dioxygenase 1 OS=Homo sapiens OX=9606 GN=PLOD1 PE=1 SV=2	7	4	11	83.5	PLOD1	120623	84615.4	56981.6	158046	152109	155324
Proteasome subunit beta type-6 OS=Homo sapiens OX=9606 GN=PSMB6 PE=1 SV=4	13	3	11	25.3	PSMB6	376425	189732	138812	217386	173064	183778
Protein transport protein Sec24C OS=Homo sapiens OX=9606 GN=SEC24C PE=1 SV=1	9	6	11	111.9	SEC24C	798831	314961	135866	552902	567946	558699
Putative HLA class I histocompatibility antigen, alpha chain H OS=Homo sapiens OX=9606 GN=HLA-H PE=5 SV=3	11	3	11	40.9	HLA-H	85212.6	86294.9	11831.4	138697	116736	112360
Pyruvate kinase PKLR OS=Homo sapiens OX=9606 GN=PKLR PE=1 SV=2	6	3	11	61.8	PKLR	136143
Rab11 family-interacting protein 5 OS=Homo sapiens OX=9606 GN=RAB11FIP5 PE=1 SV=1	8	6	11	138.3	RAB11FIP5	127138	89993.8	46220.7	137267	175479	97165
Runt-related transcription factor 1 OS=Homo sapiens OX=9606 GN=RUNX1 PE=1 SV=3	10	3	11	48.7	RUNX1	356584	196158	115929	216366	200238	230238
Serine/threonine-protein kinase PLK1 OS=Homo sapiens OX=9606 GN=PLK1 PE=1 SV=1	9	4	11	68.2	PLK1	618322	468484	123973	465370	271529	301908
Seryl-tRNA synthetase OS=Homo sapiens OX=9606 GN=SARS2 PE=1 SV=1	13	4	11	58.1	SARS2	114243	41343.8	16252.6	151863	129784	76863.4
Signal transducer and activator of transcription 1-alpha/beta OS=Homo sapiens OX=9606 GN=STAT1 PE=1 SV=2	9	5	11	87.3	STAT1	291772	90515.7	36393.6	224301	178836	164155
Spermidine synthase OS=Homo sapiens OX=9606 GN=SRM PE=1 SV=1	21	4	11	33.8	SRM	486166	82786.2	28459.3	115688	193200	408613
StAR-related lipid transfer protein 13 OS=Homo sapiens OX=9606 GN=STARD13 PE=1 SV=2	7	5	11	124.9	STARD13	493689	144779	123536	316154	277164	231738
Synaptic vesicle membrane protein VAT-1 homolog OS=Homo sapiens OX=9606 GN=VAT1 PE=1 SV=2	17	5	11	41.9	VAT1	311695	168494	151278	611638	461858	405477
Tight junction protein ZO-2 OS=Homo sapiens OX=9606 GN=TJP2 PE=1 SV=2	4	3	11	133.9	TJP2	228420	168356	99849.7	307249	252539	228506
Transcriptional repressor p66-alpha OS=Homo sapiens OX=9606 GN=GATAD2A PE=1 SV=1	15	6	11	68	GATAD2A	289951	61038.7	44591.5	115926	103475	129060
Trinucleotide repeat-containing gene 6A protein OS=Homo sapiens OX=9606 GN=TNRC6A PE=1 SV=2	2	3	11	210.2	TNRC6A	128840	137312	38884.2	172889	150722	180589
Tripartite motif-containing protein 46 OS=Homo sapiens OX=9606 GN=TRIM46 PE=1 SV=1	9	4	11	69.5	TRIM46	106121	84422.1	36836.1	188278	146288	187553
Triple functional domain protein OS=Homo sapiens OX=9606 GN=TRIO PE=1 SV=2	2	6	11	346.7	TRIO	396189	399211	65667.9	317709	254524	249430
Tubulin-specific chaperone D OS=Homo sapiens OX=9606 GN=TBCD PE=1 SV=1	5	5	11	136.5	TBCD	180107	72101	49841.8	212310	155360	174340
Tyrosine-protein kinase (Fragment) OS=Homo sapiens OX=9606 GN=JAK1 PE=1 SV=1	7	6	11	114.1		539287	401067	160343	587160	438326	591693
Ubiquitin carboxyl-terminal hydrolase 10 OS=Homo sapiens OX=9606 GN=USP10 PE=1 SV=2	9	6	11	87.1	USP10	1.10989e+06	229204	154173	460851	366979	300194
26S proteasome regulatory subunit 8 OS=Homo sapiens OX=9606 GN=PSMC5 PE=1 SV=1	15	5	10	45.6	PSMC5	171017	79878.5	73773.2	205574	159473	140166
40S ribosomal protein S28 OS=Homo sapiens OX=9606 GN=RPS28 PE=1 SV=1	46	3	10	7.8	RPS28	270473	104718	29481.1	527255	599408	122508
60S ribosomal protein L19 OS=Homo sapiens OX=9606 GN=RPL19 PE=1 SV=1	13	2	10	23.5	RPL19	757052	428465	172871	2.47978e+06	1.47463e+06	1.10903e+06
60S ribosomal protein L34 OS=Homo sapiens OX=9606 GN=RPL34 PE=1 SV=3	37	5	10	13.3	RPL34	1.40951e+06	280546	66756.5	2.90097e+06	1.66811e+06	1.49275e+06
60S ribosomal protein L9 OS=Homo sapiens OX=9606 GN=RPL9 PE=1 SV=1	15	2	10	21.9	RPL9	454062	86997.5	24249.1	354424	347432	493242
Acetyl-CoA acetyltransferase, mitochondrial OS=Homo sapiens OX=9606 GN=ACAT1 PE=1 SV=1	18	4	10	33.5		576464	152437	48744.5	277794	293041	366407
Acetyl-CoA carboxylase 1 OS=Homo sapiens OX=9606 GN=ACACA PE=1 SV=2	4	7	10	265.4	ACACA	502637	124660	39745.6	177044	125651	135156
Activity-dependent neuroprotector homeobox protein OS=Homo sapiens OX=9606 GN=ADNP PE=1 SV=1	3	2	10	123.5	ADNP	123855	86686.9	52879.3	216764	220954	192199
ADP-ribosylation factor 4 (Fragment) OS=Homo sapiens OX=9606 GN=ARF4 PE=1 SV=1	17	2	10	14.5		526927	239112	126498	711709	438488	210125
Alanine--tRNA ligase, mitochondrial OS=Homo sapiens OX=9606 GN=AARS2 PE=1 SV=1	4	3	10	107.3	AARS2	177469	48448.9	28859.5	108436	91940.1	78910.4
Aspartyl/asparaginyl beta-hydroxylase OS=Homo sapiens OX=9606 GN=ASPH PE=1 SV=3	10	5	10	85.8	ASPH	106433	64546.9	4866.23	231499	243706	259406
Ataxin-10 OS=Homo sapiens OX=9606 GN=ATXN10 PE=1 SV=1	15	5	10	53.5	ATXN10	775567	43764.7	36261.7	130262	84227.8	83047.6
ATP-dependent RNA helicase DDX42 OS=Homo sapiens OX=9606 GN=DDX42 PE=1 SV=1	3	3	10	102.9	DDX42	187241	121402	45494.6	161067	164888	215166
BAG family molecular chaperone regulator 3 OS=Homo sapiens OX=9606 GN=BAG3 PE=1 SV=3	14	5	10	61.6	BAG3	141167	82350.2	29512.2	127791	160074	129142
cAMP-dependent protein kinase type II-alpha regulatory subunit OS=Homo sapiens OX=9606 GN=PRKAR2A PE=1 SV=2	8	3	10	45.5	PRKAR2A	409561	287451	185609	409019	260946	357510
Citrate synthase OS=Homo sapiens OX=9606 GN=CS PE=1 SV=1	9	3	10	44.7	CS	219267	67495.9	59459.3	192847	103679	181003
Cleavage and polyadenylation specificity factor subunit 1 OS=Homo sapiens OX=9606 GN=CPSF1 PE=1 SV=2	4	4	10	160.8	CPSF1	239038	288264	255636	441948	387163	270957
Coiled-coil domain-containing protein 120 OS=Homo sapiens OX=9606 GN=CCDC120 PE=1 SV=1	8	3	10	67.5	CCDC120	222559	206598	87714.1	275515	247262	217865
COP9 signalosome complex subunit 4 OS=Homo sapiens OX=9606 GN=COPS4 PE=1 SV=1	15	5	10	47.7	COPS4	168524	63807.8	40023.6	241320	202305	138899
Cysteine desulfurase, mitochondrial OS=Homo sapiens OX=9606 GN=NFS1 PE=1 SV=3	11	4	10	50.2	NFS1	317932	225621	62287.5	412914	314005	220510
Cytochrome c oxidase polypeptide Va OS=Homo sapiens OX=9606 GN=COX5A PE=1 SV=1	16	2	10	17.2		175980	132573	59208.7	222021	233587	345515
Cytochrome c1, heme protein, mitochondrial OS=Homo sapiens OX=9606 GN=CYC1 PE=1 SV=3	7	2	10	35.4	CYC1	327266	226896	56343.7	426618	250340	401528
Cytoplasmic polyadenylation element-binding protein 2 OS=Homo sapiens OX=9606 GN=CPEB2 PE=2 SV=3	9	4	10	64.9	CPEB2	40371.1	24697.9	9251.69	40558.6	44733	23634.5
Cytoplasmic tRNA 2-thiolation protein 2 OS=Homo sapiens OX=9606 GN=CTU2 PE=1 SV=1	8	4	10	63.6	CTU2	268354	86175	30940.9	152775	132510	143173
Desmoglein-1 OS=Homo sapiens OX=9606 GN=DSG1 PE=1 SV=2	4	3	10	113.7	DSG1	82398.4	66535.1	63458.8	75238	76116.4	75619.1
DNA mismatch repair protein Msh6 OS=Homo sapiens OX=9606 GN=MSH6 PE=1 SV=2	5	5	10	152.7	MSH6	831829	85326.6	38160	218496	113795	147530
DNA replication licensing factor MCM2 OS=Homo sapiens OX=9606 GN=MCM2 PE=1 SV=4	7	5	10	101.8	MCM2	1.12221e+06	45536.9	22701.3	84413	44804.3	60507.6
DnaJ homolog subfamily B member 4 OS=Homo sapiens OX=9606 GN=DNAJB4 PE=1 SV=1	14	4	10	37.8	DNAJB4	399010	255554	191326	220084	67012.4	153375
Dystrobrevin alpha OS=Homo sapiens OX=9606 GN=DTNA PE=1 SV=2	10	6	10	83.8	DTNA	806770	767672	288149	1.58208e+06	1.03494e+06	762351
Dystrobrevin OS=Homo sapiens OX=9606 GN=DTNB PE=1 SV=1	9	5	10	67	DTNB	113750	105689	48788.8	112266	111574	108213
E3 ubiquitin-protein ligase MARCHF7 OS=Homo sapiens OX=9606 GN=MARCHF7 PE=1 SV=1	7	3	10	70.1	MARCH7	83726.9	56995.7	46220.7	105909	83594.5	44472.2
FACT complex subunit SSRP1 OS=Homo sapiens OX=9606 GN=SSRP1 PE=1 SV=1	9	6	10	81	SSRP1	378970	224795	101469	749128	476194	407756
F-actin-capping protein subunit beta OS=Homo sapiens OX=9606 GN=CAPZB PE=1 SV=1	13	4	10	33.8	CAPZB	1.8475e+06	432063	158441	656543	523045	617525
FAD-dependent oxidoreductase domain-containing protein 1 OS=Homo sapiens OX=9606 GN=FOXRED1 PE=1 SV=2	6	3	10	53.8	FOXRED1	796154	704904	353718	1.2583e+06	1.05689e+06	1.35736e+06
Far upstream element-binding protein 3 OS=Homo sapiens OX=9606 GN=FUBP3 PE=1 SV=2	12	6	10	61.6	FUBP3	399764	239229	179420	366164	331777	392874
F-box only protein 31 OS=Homo sapiens OX=9606 GN=FBXO31 PE=1 SV=2	8	3	10	60.6	FBXO31	172685	68497.2	49918.8	152642	156994	92910.8
Fibroblast growth factor OS=Homo sapiens OX=9606 GN=FGF2 PE=1 SV=1	12	4	10	30.7		358987	322334	70019.6	978093	804784	1.44254e+06
Fragile X mental retardation syndrome-related protein 2 OS=Homo sapiens OX=9606 GN=FXR2 PE=1 SV=2	10	6	10	74.2	FXR2	45316.9	6920.67	8554.19	77560.8	71276.7	36767.7
Gamma-tubulin complex component 2 OS=Homo sapiens OX=9606 GN=TUBGCP2 PE=1 SV=2	9	6	10	102.5	TUBGCP2	352588	273482	128391	421089	302390	537679
Glutaryl-CoA dehydrogenase, mitochondrial OS=Homo sapiens OX=9606 GN=GCDH PE=1 SV=1	9	3	10	48.1	GCDH	285266	284034	129146	339033	379323	627099
Glycine--tRNA ligase OS=Homo sapiens OX=9606 GN=GARS1 PE=4 SV=1	9	5	10	83.8		647296	154188	63240.7	255125	149320	285615
GST class-pi OS=Homo sapiens OX=9606 GN=GSTP1 PE=1 SV=1	22	3	10	19.5		245289	118149	52680.2	177727	77688.1	256779
GTPase Era, mitochondrial OS=Homo sapiens OX=9606 GN=ERAL1 PE=1 SV=2	8	3	10	48.3	ERAL1	285848	215373	114303	520041	411310	449631
HBS1-like protein OS=Homo sapiens OX=9606 GN=HBS1L PE=1 SV=1	10	4	10	75.4	HBS1L	326500	149444	71065.3	296836	272740	139122
Heat shock 70 kDa protein 4 OS=Homo sapiens OX=9606 GN=HSPA4 PE=1 SV=4	10	6	10	94.3	HSPA4	507049	8739.46	11766.6	37533.6	20854.6	47899.3
Heat shock protein beta-8 OS=Homo sapiens OX=9606 GN=HSPB8 PE=4 SV=1	15	2	10	14.6		258241	269145	134206	307406	320909	393634
Importin subunit alpha-5 (Fragment) OS=Homo sapiens OX=9606 GN=KPNA1 PE=1 SV=1	19	3	10	19.9		235370	107314	64097.3	229036	163740	116570
Integrin beta-4 OS=Homo sapiens OX=9606 GN=ITGB4 PE=1 SV=5	3	4	10	202	ITGB4	47841.9	44469	25111.2	206247	151402	197819
Inverted formin-2 OS=Homo sapiens OX=9606 GN=INF2 PE=4 SV=1	5	4	10	134.6		104337	41135.9	18638.7	170767	139461	112749
Kinesin-like protein KIFC1 OS=Homo sapiens OX=9606 GN=KIFC1 PE=1 SV=2	11	5	10	73.7	KIFC1	183743	91040.6	55760.8	222590	172654	150660
LIM domain and actin-binding protein 1 OS=Homo sapiens OX=9606 GN=LIMA1 PE=1 SV=1	9	3	10	43.2		233161	167882	73715	286534	211249	131276
Lymphoid-specific helicase OS=Homo sapiens OX=9606 GN=HELLS PE=1 SV=1	2	2	10	97	HELLS	132082	118314	66229.3	208820	171869	172374
Lysine--tRNA ligase OS=Homo sapiens OX=9606 GN=KARS1 PE=1 SV=3	9	6	10	68	KARS	1.13381e+06	178376	177482	511732	461323	391467
Matrin-3 OS=Homo sapiens OX=9606 GN=MATR3 PE=1 SV=1	7	4	10	99.9		669214	166726	51325.3	199046	289477	626228
Mitochondrial antiviral-signaling protein OS=Homo sapiens OX=9606 GN=MAVS PE=1 SV=2	11	3	10	56.5	MAVS	252043	81040.1	28871.3	130583	88152.6	95614.3
Mitochondrial carrier homolog 1 (Fragment) OS=Homo sapiens OX=9606 GN=MTCH1 PE=1 SV=1	3	1	10	43.1		189575	187777	85695.8	260243	212721	310474
Mitogen-activated protein kinase 3 OS=Homo sapiens OX=9606 GN=MAPK3 PE=1 SV=4	11	4	10	43.1	MAPK3	381306	187556	101876	328720	249650	224213
Multifunctional procollagen lysine hydroxylase and glycosyltransferase LH3 OS=Homo sapiens OX=9606 GN=PLOD3 PE=1 SV=1	4	3	10	84.7	PLOD3	231018	153025	113279	309715	256003	167612
Muscleblind-like protein 1 OS=Homo sapiens OX=9606 GN=MBNL1 PE=1 SV=1	12	3	10	43	MBNL1	1.88637e+06	261891	192532	625119	477027	399987
Myotubularin-related protein 13 OS=Homo sapiens OX=9606 GN=SBF2 PE=4 SV=1	3	4	10	210.6		137578	81916.3	25611.7	108432	140088	218420
Na(+)/H(+) exchange regulatory cofactor NHE-RF1 OS=Homo sapiens OX=9606 GN=SLC9A3R1 PE=1 SV=4	22	5	10	38.8	SLC9A3R1	343830	60137.4	108709	274998	214358	148232
Nodal modulator 2 OS=Homo sapiens OX=9606 GN=NOMO2 PE=1 SV=1	4	4	10	139.4	NOMO2	293364	137912	104634	228759	211607	242917
Nuclear export mediator factor NEMF OS=Homo sapiens OX=9606 GN=NEMF PE=1 SV=4	4	4	10	122.9	NEMF	122663	140706	64004.5	544945	477053	570103
Paxillin OS=Homo sapiens OX=9606 GN=PXN PE=1 SV=1	7	3	10	64.2	PXN	102055	89765.8	67613.5	155092	122462	171481
Phenylalanine--tRNA ligase beta subunit OS=Homo sapiens OX=9606 GN=FARSB PE=1 SV=3	7	4	10	66.1	FARSB	878341	358819	146614	522285	451817	435897
Plasma membrane calcium-transporting ATPase 2 OS=Homo sapiens OX=9606 GN=ATP2B2 PE=1 SV=2	4	4	10	136.8	ATP2B2		8293.24	2968.31	33184	16233.2	15421.7
Pleckstrin homology domain-containing family A member 6 (Fragment) OS=Homo sapiens OX=9606 GN=PLEKHA6 PE=1 SV=1	12	3	10	42.1		55457.1	29878.1	35716.9	128017	113904	116452
Polypyrimidine tract-binding protein 3 OS=Homo sapiens OX=9606 GN=PTBP3 PE=1 SV=2	10	3	10	59.7	PTBP3	36656.5					14439
Proteasome subunit alpha type-7 OS=Homo sapiens OX=9606 GN=PSMA7 PE=1 SV=1	16	3	10	27.9	PSMA7	918792	280487	153291	585986	511995	543667
Protein arginine N-methyltransferase 1 OS=Homo sapiens OX=9606 GN=PRMT1 PE=1 SV=1	26	7	10	37.7		2.91278e+06	399368	86306.1	473358	389487	335115
Protein FAM83B OS=Homo sapiens OX=9606 GN=FAM83B PE=1 SV=1	5	5	10	114.7	FAM83B	459082	323292	208356	747928	653498	813338
Protein FAM98B OS=Homo sapiens OX=9606 GN=FAM98B PE=1 SV=2	9	3	10	45.5		421251	199364	41342.8	418295	349878	192580
Putative RNA-binding protein Luc7-like 2 OS=Homo sapiens OX=9606 GN=LUC7L2 PE=1 SV=2	18	6	10	46.5	LUC7L2	1.42116e+06	72862.8	25207.3	231386	158424	114224
Pyruvate dehydrogenase E1 component subunit beta, mitochondrial OS=Homo sapiens OX=9606 GN=PDHB PE=1 SV=3	11	3	10	39.2	PDHB	423678	111066	31869.4	415775	208805	195650
Ras GTPase-activating protein-binding protein 2 OS=Homo sapiens OX=9606 GN=G3BP2 PE=1 SV=2	11	4	10	54.1	G3BP2	599340	358051	195311	534619	495552	475475
Ribonucleoside-diphosphate reductase large subunit OS=Homo sapiens OX=9606 GN=RRM1 PE=1 SV=1	11	6	10	64.8	RRM1	640961	154581	85962.3	312221	277452	205868
RNA-binding E3 ubiquitin-protein ligase MEX3C OS=Homo sapiens OX=9606 GN=MEX3C PE=1 SV=3	4	2	10	69.3	MEX3C	133946	108318	49927.1	255022	170952	186796
RNA-binding motif protein, X chromosome OS=Homo sapiens OX=9606 GN=RBMX PE=1 SV=3	17	6	10	42.3	RBMX	1.02496e+06	443746	188058	803998	734615	475196
RNA-binding protein 10 OS=Homo sapiens OX=9606 GN=RBM10 PE=1 SV=3	10	5	10	103.5	RBM10	761024	142467	65488.7	289551	229715	209745
Serine/threonine-protein phosphatase (Fragment) OS=Homo sapiens OX=9606 GN=PPP1CB PE=1 SV=1	33	3	10	14.3		1.30416e+06	502825	382364	1.31309e+06	886613	674166
Serine/threonine-protein phosphatase OS=Homo sapiens OX=9606 GN=PPP1CC PE=1 SV=1	30	3	10	16.2		501904	39312.3	30103.3	171106	216191	78042.7
Sorting nexin-27 OS=Homo sapiens OX=9606 GN=SNX27 PE=1 SV=2	8	4	10	61.2	SNX27	936194	914356	480548	1.3317e+06	987654	1.00831e+06
Squamous cell carcinoma antigen recognized by T-cells 3 OS=Homo sapiens OX=9606 GN=SART3 PE=1 SV=1	9	5	10	109.9	SART3	345938	63154	31343.3	203357	208994	212914
Stomatin-like protein 2, mitochondrial OS=Homo sapiens OX=9606 GN=STOML2 PE=1 SV=1	19	4	10	38.5	STOML2	831884	298588	393841	1.1036e+06	719887	622138
Stromal cell-derived factor 2-like protein 1 OS=Homo sapiens OX=9606 GN=SDF2L1 PE=1 SV=2	10	2	10	23.6	SDF2L1	608109	722154	165237	625820	536742	733238
TGF-beta-activated kinase 1 and MAP3K7-binding protein 1 OS=Homo sapiens OX=9606 GN=TAB1 PE=1 SV=1	13	4	10	54.6	TAB1	124210	91352.2	43274.3	104984	86132.6	64402.7
Trafficking protein particle complex subunit 10 OS=Homo sapiens OX=9606 GN=TRAPPC10 PE=1 SV=2	3	3	10	142.1	TRAPPC10	77595.1	125140	41487.4	111065	119692	128415
Trafficking protein particle complex subunit OS=Homo sapiens OX=9606 GN=TRAPPC4 PE=1 SV=1	18	3	10	19.5	TRAPPC4	367351	335496	129073	469852	317227	331416
Translation initiation factor eIF-2B subunit delta OS=Homo sapiens OX=9606 GN=EIF2B4 PE=1 SV=1	4	2	10	59.7	EIF2B4	92477.3	58463.1	35774.3	152998	127185	161307
Tumor susceptibility gene 101 protein OS=Homo sapiens OX=9606 GN=TSG101 PE=1 SV=1	7	2	10	40.9		78714.8	80777.6	14860.2	61197.5	103569	117096
Tyrosine-protein kinase receptor UFO OS=Homo sapiens OX=9606 GN=AXL PE=1 SV=4	6	4	10	98.3		207924	244742	133013	247335	225858	417437
Ubiquitin-associated domain-containing protein 2 OS=Homo sapiens OX=9606 GN=UBAC2 PE=1 SV=1	8	2	10	38.9	UBAC2	133651	102216	74121.1	169505	149365	104420
Vesicle-associated membrane protein-associated protein B/C OS=Homo sapiens OX=9606 GN=VAPB PE=1 SV=3	14	3	10	27.2	VAPB	579880	295694	76416.9	434691	346796	454996
Vesicle-fusing ATPase OS=Homo sapiens OX=9606 GN=NSF PE=1 SV=3	8	5	10	82.5	NSF	375740	174113	95902.6	363396	234128	335697
Zinc finger protein 609 OS=Homo sapiens OX=9606 GN=ZNF609 PE=1 SV=2	3	3	10	151.1	ZNF609	320026	166005	93369.9	254739	205155	188495
26S proteasome non-ATPase regulatory subunit 13 OS=Homo sapiens OX=9606 GN=PSMD13 PE=1 SV=2	11	4	9	42.9	PSMD13	513093	389621	151473	552261	415263	398754
28S ribosomal protein S29, mitochondrial OS=Homo sapiens OX=9606 GN=DAP3 PE=1 SV=1	6	2	9	45.5	DAP3	241063	167688	58644.5	458678	321339	310241
4F2 cell-surface antigen heavy chain OS=Homo sapiens OX=9606 GN=SLC3A2 PE=1 SV=1	7	4	9	64.8		410390	389288	64243.5	376657	268930	545519
60S acidic ribosomal protein P1 OS=Homo sapiens OX=9606 GN=RPLP1 PE=1 SV=1	52	2	9	11.5	RPLP1	435524	112687	26225.7	377162	651554	1.42411e+06
60S ribosomal protein L17 (Fragment) OS=Homo sapiens OX=9606 GN=RPL17 PE=1 SV=1	19	3	9	20.2		2.05052e+06	451345	128988	2.37286e+06	1.40706e+06	935198
60S ribosomal protein L29 OS=Homo sapiens OX=9606 GN=RPL29 PE=1 SV=1	14	3	9	18.5		1.90293e+06	631618	250808	2.40091e+06	1.79505e+06	3.1143e+06
60S ribosomal protein L36 OS=Homo sapiens OX=9606 GN=RPL36 PE=1 SV=3	29	3	9	12.2	RPL36	1.30705e+06	527842	45362.4	1.68525e+06	1.14105e+06	1.31648e+06
ADP-ribosylation factor GTPase-activating protein 3 (Fragment) OS=Homo sapiens OX=9606 GN=ARFGAP3 PE=1 SV=1	14	3	9	30		116176	82092.8	42506	99541.3	107771	121475
AP-3 complex subunit beta-1 OS=Homo sapiens OX=9606 GN=AP3B1 PE=1 SV=3	5	4	9	121.2	AP3B1	423630	185905	55269.4	404568	401666	641189
ATP-binding cassette sub-family F member 2 OS=Homo sapiens OX=9606 GN=ABCF2 PE=1 SV=2	9	5	9	71.2	ABCF2	425470	177661	63703.4	298148	136665	148356
ATP-dependent zinc metalloprotease YME1L1 OS=Homo sapiens OX=9606 GN=YME1L1 PE=1 SV=1	6	3	9	82.6	YME1L1	315901	267867	96487.6	362246	320518	384249
Beta-enolase OS=Homo sapiens OX=9606 GN=ENO3 PE=1 SV=5	8	2	9	47	ENO3	692539	427095	755048	1.01252e+06	413249	385351
Breakpoint cluster region protein OS=Homo sapiens OX=9606 GN=BCR PE=1 SV=2	3	3	9	142.7	BCR	103730	119594	32712.1	347936	326790	258440
BTB/POZ domain-containing protein KCTD3 OS=Homo sapiens OX=9606 GN=KCTD3 PE=1 SV=2	8	5	9	88.9	KCTD3	132826	106859	72173.6	170661	119266	33763.9
Calcium/calmodulin-dependent 3',5'-cyclic nucleotide phosphodiesterase 1C OS=Homo sapiens OX=9606 GN=PDE1C PE=1 SV=1	7	3	9	80.7	PDE1C	69806	28321.4	34809	246681	162623	90886.3
Carbonyl reductase [NADPH] 1 OS=Homo sapiens OX=9606 GN=CBR1 PE=1 SV=3	15	3	9	30.4	CBR1; SETD4	511880	342419	177610	529942	490128	436321
Chloride channel CLIC-like protein 1 OS=Homo sapiens OX=9606 GN=CLCC1 PE=4 SV=1	21	6	9	48.4		2.77044e+06	6502.81		45161	37632.8
Cleavage and polyadenylation specificity factor subunit 7 OS=Homo sapiens OX=9606 GN=CPSF7 PE=1 SV=1	11	4	9	52	CPSF7	379219	238317	182821	315895	282708	199628
Cleavage stimulation factor subunit 2 OS=Homo sapiens OX=9606 GN=CSTF2 PE=1 SV=1	8	4	9	60.9	CSTF2	455957	126035	92866.9	251209	233910	212072
CREB-binding protein OS=Homo sapiens OX=9606 GN=CREBBP PE=1 SV=3	2	5	9	265.2	CREBBP	161670	171993	89155.4	252273	154286	124065
Cullin-5 OS=Homo sapiens OX=9606 GN=CUL5 PE=1 SV=4	3	2	9	90.9	CUL5	220110	214789	80261.4	296900	188118	228577
DnaJ homolog subfamily C member 11 OS=Homo sapiens OX=9606 GN=DNAJC11 PE=1 SV=2	9	4	9	63.2	DNAJC11	527874	630802	321461	758787	515881	655086
Dual specificity protein phosphatase 3 OS=Homo sapiens OX=9606 GN=DUSP3 PE=1 SV=1	19	3	9	20.5	DUSP3	289534	165032	57151.4	259083	188307	222595
E3 ubiquitin-protein ligase UBR4 OS=Homo sapiens OX=9606 GN=UBR4 PE=1 SV=1	1	5	9	573.5	UBR4	224455	296379	49270.9	153634	90490.9	116082
Eukaryotic translation initiation factor 3 subunit H OS=Homo sapiens OX=9606 GN=EIF3H PE=1 SV=1	11	3	9	39.6		335075	193391	103812	419335	262621	163421
F-box only protein 21 (Fragment) OS=Homo sapiens OX=9606 GN=FBXO21 PE=1 SV=1	9	2	9	25.7		144825	134598	12240.8	142610	91795.6	72830
F-box only protein 3 OS=Homo sapiens OX=9606 GN=FBXO3 PE=1 SV=1	14	3	9	41.1	FBXO3	337013	550302	33415.6	334848	307137	403701
Focal adhesion kinase 1 OS=Homo sapiens OX=9606 GN=PTK2 PE=1 SV=2	5	3	9	119.2	PTK2	137403	72915.2	45460.5	208248	159079	157746
Fumarate hydratase, mitochondrial OS=Homo sapiens OX=9606 GN=FH PE=1 SV=3	13	4	9	54.6	FH	342238	23783.9	35520	79737.8	48233.9	34167.1
Golgi resident protein GCP60 OS=Homo sapiens OX=9606 GN=ACBD3 PE=1 SV=4	10	3	9	60.6	ACBD3	192719	71795.8	59946.8	165457	126714	81546.8
Golgi-associated plant pathogenesis-related protein 1 OS=Homo sapiens OX=9606 GN=GLIPR2 PE=1 SV=3	17	2	9	17.2	GLIPR2	130000	120940	90910	200683	138821	117314
Hemoglobin subunit alpha OS=Homo sapiens OX=9606 GN=HBA1 PE=1 SV=2	11	2	9	15.2	HBA2; HBA1	453863	400007	36620.2	56232.3	235034	97259.3
Histone H1.5 OS=Homo sapiens OX=9606 GN=H1-5 PE=1 SV=3	26	6	9	22.6	HIST1H1B	3.20715e+06	21707.6
Immunoglobulin heavy variable 3-72 OS=Homo sapiens OX=9606 GN=IGHV3-72 PE=1 SV=1	11	1	9	11.2		1.37058e+06	1.282e+06	244590	609379	1.05723e+06	919922
Importin-7 OS=Homo sapiens OX=9606 GN=IPO7 PE=1 SV=1	5	4	9	119.4	IPO7	257488	125263	15781.2	265972	289787	352703
Insulin receptor substrate 2 OS=Homo sapiens OX=9606 GN=IRS2 PE=1 SV=2	4	3	9	137.2	IRS2	210283	135823	90840.6	270080	235435	300591
Integrator complex subunit 1 OS=Homo sapiens OX=9606 GN=INTS1 PE=1 SV=2	2	4	9	244.1	INTS1	57863.4	75602.5	27802.2	165063	94360.8	137301
Intraflagellar transport protein 74 homolog OS=Homo sapiens OX=9606 GN=IFT74 PE=1 SV=1	7	3	9	69.2	IFT74	62085.2	77292.9	69074.8	157101	131890	95826.3
Iporin OS=Homo sapiens OX=9606 GN=RUSC2 PE=1 SV=3	4	3	9	161.1	RUSC2	126127	88950.4	62251.3	153546	100008	102086
Kinesin-like protein KIF13A OS=Homo sapiens OX=9606 GN=KIF13A PE=1 SV=2	4	5	9	202.2	KIF13A	44617.3		6552.93	380375	337299	280497
Kinesin-like protein KIF20A OS=Homo sapiens OX=9606 GN=KIF20A PE=1 SV=1	5	3	9	100.2	KIF20A	147589	68015.2	40775.7	108880	101502	101552
Kinesin-like protein KIF2C OS=Homo sapiens OX=9606 GN=KIF2C PE=1 SV=2	9	5	9	81.3	KIF2C	370544	95179.2	81304.4	297293	242499	135551
Liprin-alpha-1 OS=Homo sapiens OX=9606 GN=PPFIA1 PE=1 SV=1	7	5	9	135.7	PPFIA1	161869	76922.3	12874.2	203843	44333.9	168767
Long-chain fatty acid transport protein 4 OS=Homo sapiens OX=9606 GN=SLC27A4 PE=1 SV=1	10	5	9	72	SLC27A4	87524.2	49418.7	33200	108065	120163	139997
Low molecular weight phosphotyrosine protein phosphatase OS=Homo sapiens OX=9606 GN=ACP1 PE=1 SV=3	32	4	9	18	ACP1	453903	99846.4	27952.2	104010	83938.2	148242
MAGUK p55 subfamily member 6 OS=Homo sapiens OX=9606 GN=MPP6 PE=1 SV=2	6	3	9	61.1	MPP6	79836.5	168310	53099.7	183152	150146	242534
Monocarboxylate transporter 4 OS=Homo sapiens OX=9606 GN=SLC16A3 PE=1 SV=1	9	4	9	49.4	SLC16A3	571604	387732	294115	1.41814e+06	704984	532389
Myosin-10 OS=Homo sapiens OX=9606 GN=MYH10 PE=1 SV=3	3	6	9	228.9	MYH10	203531		4722.84	11965.9	14221.2
NADH dehydrogenase [ubiquinone] 1 alpha subcomplex subunit 10, mitochondrial OS=Homo sapiens OX=9606 GN=NDUFA10 PE=1 SV=1	8	3	9	40.7	NDUFA10	480972	375980	178517	1.21033e+06	785952	528571
Nascent polypeptide-associated complex subunit alpha OS=Homo sapiens OX=9606 GN=NACA PE=1 SV=2	18	3	9	25.3		852565	85456.5	52271.5	252834	225705	130895
Non-specific serine/threonine protein kinase OS=Homo sapiens OX=9606 GN=MARK2 PE=1 SV=3	6	3	9	86.6	MARK2	101459	48804.4	22735.3	123112	99070.4	112811
Nuclear RNA export factor 1 OS=Homo sapiens OX=9606 GN=NXF1 PE=1 SV=1	9	5	9	70.1	NXF1	1.43447e+06	139471	29319.9	258171	212846	242589
OCIA domain-containing protein 1 (Fragment) OS=Homo sapiens OX=9606 GN=OCIAD1 PE=1 SV=1	17	2	9	19		107257	34326.5	4225.89	55084.7	80463.1	167167
Patatin-like phospholipase domain-containing protein 6 OS=Homo sapiens OX=9606 GN=PNPLA6 PE=1 SV=1	4	4	9	149.8		153536	128754	28389	135078	206233	362102
Peroxiredoxin-6 OS=Homo sapiens OX=9606 GN=PRDX6 PE=1 SV=3	35	6	9	25	PRDX6	2.23229e+06	160043	48586.8	288528	172300	318343
Pinin OS=Homo sapiens OX=9606 GN=PNN PE=1 SV=5	5	3	9	81.6		673988	276255	112553	699902	675384	614912
Plastin-3 OS=Homo sapiens OX=9606 GN=PLS3 PE=1 SV=1	4	2	9	69.3		153824	123837	121351	248708	168150	217514
Polyadenylate-binding protein 2 OS=Homo sapiens OX=9606 GN=PABPN1 PE=1 SV=3	9	2	9	32.7	PABPN1	315675	68669.3	33161.5	102090	134646	321562
Pre-B-cell leukemia transcription factor-interacting protein 1 OS=Homo sapiens OX=9606 GN=PBXIP1 PE=1 SV=1	7	5	9	80.6	PBXIP1	244970	206137	71662.3	190760	243232	295789
Probable ATP-dependent RNA helicase DDX28 OS=Homo sapiens OX=9606 GN=DDX28 PE=1 SV=2	11	4	9	59.5	DDX28	195157	93616.8	43095.8	258143	199577	243751
Proteasome adapter and scaffold protein ECM29 OS=Homo sapiens OX=9606 GN=ECPAS PE=1 SV=1	2	4	9	223.6	KIAA0368	343420	89943.7	52425.5	196975	175226	253108
Proteasome subunit alpha type-1 OS=Homo sapiens OX=9606 GN=PSMA1 PE=1 SV=1	8	2	9	29.5	PSMA1	2.71647e+06	2.48593e+06	1.00431e+06	4.55096e+06	3.3884e+06	4.2911e+06
Proteasome subunit alpha type-3 OS=Homo sapiens OX=9606 GN=PSMA3 PE=1 SV=2	16	3	9	28.4	PSMA3	181966	155964	60074.5	177393	116997	157914
Protein ERGIC-53 OS=Homo sapiens OX=9606 GN=LMAN1 PE=1 SV=2	8	3	9	57.5	LMAN1	668904	73372	81332.5	181686	150460	112395
Protein flightless-1 homolog OS=Homo sapiens OX=9606 GN=FLII PE=1 SV=1	7	4	9	78		21381	27175.2	11619.1	28802.5	22146.6	19022.8
Protein Hook homolog 3 OS=Homo sapiens OX=9606 GN=HOOK3 PE=1 SV=2	8	4	9	83.1	HOOK3	138459	63125.4	40990.6	105334	89669	48719.7
Protein phosphatase 1 regulatory subunit 12A OS=Homo sapiens OX=9606 GN=PPP1R12A PE=1 SV=1	5	4	9	115.2	PPP1R12A	1.13743e+06	841902	177000	702922	874405	1.81237e+06
Protein SCO2 homolog, mitochondrial OS=Homo sapiens OX=9606 GN=SCO2 PE=1 SV=3	11	2	9	29.8	SCO2	259046	294934	113810	531196	334314	159997
Ras association domain-containing protein 7 OS=Homo sapiens OX=9606 GN=RASSF7 PE=1 SV=1	14	4	9	39.9	RASSF7	187973	131844	91181.7	188110	184998	192064
Ras-related protein Rab-1A OS=Homo sapiens OX=9606 GN=RAB1A PE=1 SV=3	31	5	9	22.7	RAB1A	1.49759e+06	527559	115692	762353	494920	622315
Ras-related protein Rab-34, isoform NARR OS=Homo sapiens OX=9606 GN=RAB34 PE=1 SV=1	23	3	9	21.1	NARR; RAB34	257552	166650	132802	353202	325927	257409
Ras-related protein Rab-5B OS=Homo sapiens OX=9606 GN=RAB5B PE=1 SV=1	12	2	9	23.7	RAB5B	50036.8	35092.1	19765.2	40100.6	51747.4	42441.8
Receptor-type tyrosine-protein phosphatase kappa OS=Homo sapiens OX=9606 GN=PTPRK PE=1 SV=2	4	4	9	162	PTPRK	61245.5	47981.5	4882.52	32937.3	46992.9	109230
Replication factor C subunit 1 OS=Homo sapiens OX=9606 GN=RFC1 PE=1 SV=4	4	3	9	128.2	RFC1	119371	78044.7	35988.1	232668	154468	188438
Ribosomal protein L15 (Fragment) OS=Homo sapiens OX=9606 GN=RPL15 PE=1 SV=1	17	3	9	16.3		2.36402e+06	514567	183309	1.80009e+06	1.44358e+06	2.50924e+06
RNA helicase (Fragment) OS=Homo sapiens OX=9606 GN=DHX36 PE=1 SV=1	4	3	9	91.4		75333	69738.6	55346.3	238701	240151	195809
RNA-binding protein 39 OS=Homo sapiens OX=9606 GN=RBM39 PE=1 SV=1	10	3	9	48	RBM39	621151	254883	108082	494456	407019	340759
RNA-binding protein 4 OS=Homo sapiens OX=9606 GN=RBM4 PE=1 SV=1	7	2	9	40.3	RBM4	183678	45974.1	19830.2	184382	145715	76795.6
RNA-binding protein FUS OS=Homo sapiens OX=9606 GN=FUS PE=1 SV=1	8	4	9	53.4	FUS	506546	62364.4	24587.8	108430	130530	152807
RNA-binding protein Raly (Fragment) OS=Homo sapiens OX=9606 GN=RALY PE=1 SV=1	16	4	9	24.7	RALY	573454	442221	142912	445562	393244	482358
Serine/threonine-protein phosphatase 6 regulatory subunit 2 OS=Homo sapiens OX=9606 GN=PPP6R2 PE=1 SV=2	7	4	9	104.9	PPP6R2	172099	27030.1	13976.8	106467	122788	100592
Signal recognition particle 14 kDa protein OS=Homo sapiens OX=9606 GN=SRP14 PE=1 SV=2	25	4	9	14.6	SRP14	380098	175062	55845.8	453316	355920	400333
Signal recognition particle subunit SRP72 OS=Homo sapiens OX=9606 GN=SRP72 PE=1 SV=3	11	5	9	74.6	SRP72	292201	43071.2	30566.8	196960	98113.1	121214
Small ubiquitin-related modifier 2 OS=Homo sapiens OX=9606 GN=SUMO2 PE=1 SV=3	23	2	9	10.9	SUMO2	4.18752e+06	306631	147037	585529	408084	415439
SPATS2-like protein OS=Homo sapiens OX=9606 GN=SPATS2L PE=1 SV=2	11	5	9	61.7	SPATS2L	212527	157534	60770.1	448908	312722	289092
Spectrin alpha chain, non-erythrocytic 1 OS=Homo sapiens OX=9606 GN=SPTAN1 PE=1 SV=1	2	4	9	282.7	SPTAN1	171470	162863	38065.3	161977	153929	176620
Stathmin OS=Homo sapiens OX=9606 GN=STMN1 PE=1 SV=3	36	6	9	17.3	STMN1	1.97571e+06	63618.9	61236.2	164346	100380	133332
Synaptojanin-2 OS=Homo sapiens OX=9606 GN=SYNJ2 PE=1 SV=3	2	3	9	165.4	SYNJ2	152802	100129	59656.7	167210	108455	150625
TAR DNA-binding protein 43 OS=Homo sapiens OX=9606 GN=TARDBP PE=1 SV=1	8	3	9	44.7	TARDBP	601065	154746	128540	330776	270608	182678
TATA-binding protein-associated factor 2N OS=Homo sapiens OX=9606 GN=TAF15 PE=1 SV=1	16	5	9	61.8	TAF15	1.50997e+06	131542	142308	295964	274050	97983.7
Testis-specific Y-encoded-like protein 4 OS=Homo sapiens OX=9606 GN=TSPYL4 PE=1 SV=2	6	2	9	45.1	TSPYL4	118821	182546	82501.7	169412	147790	181411
Trafficking protein particle complex subunit 11 OS=Homo sapiens OX=9606 GN=TRAPPC11 PE=1 SV=2	4	4	9	128.8	TRAPPC11	207560	179858	96470.5	227649	168982	141072
Transcription elongation factor SPT5 OS=Homo sapiens OX=9606 GN=SUPT5H PE=1 SV=1	5	4	9	120.9	SUPT5H	158084	39809.5	7314.65	79779.9	70982.3	71059.3
Tropomyosin alpha-4 chain OS=Homo sapiens OX=9606 GN=TPM4 PE=1 SV=3	23	5	9	28.5	TPM4	921707	180373	22065.3	37511.8	25450.9	23965.8
Tumor protein D54 OS=Homo sapiens OX=9606 GN=TPD52L2 PE=1 SV=2	23	3	9	22.2	TPD52L2	199212	101316	56821.3	206232	140876	197292
UDP-N-acetylglucosamine--peptide N-acetylglucosaminyltransferase 110 kDa subunit OS=Homo sapiens OX=9606 GN=OGT PE=1 SV=3	5	4	9	116.9	OGT	272074	69092.4	74580.6	184570	136451	96969
UPF0488 protein C8orf33 OS=Homo sapiens OX=9606 GN=C8orf33 PE=1 SV=1	11	2	9	24.5		1.13572e+06	992357	607428	1.42749e+06	1.15876e+06	1.3142e+06
Vacuolar protein sorting-associated protein 4B OS=Homo sapiens OX=9606 GN=VPS4B PE=1 SV=2	12	4	9	49.3	VPS4B	30040.3	18869.3	7926.67	43814.7	44511.4	30863.5
Voltage-dependent anion-selective channel protein 3 OS=Homo sapiens OX=9606 GN=VDAC3 PE=1 SV=1	12	3	9	30.6	VDAC3	384877	212901	20461.8	176520	124803	266071
26S proteasome non-ATPase regulatory subunit 5 OS=Homo sapiens OX=9606 GN=PSMD5 PE=1 SV=3	9	4	8	56.2	PSMD5	303290	79769.5	39355.1	133602	107329	102522
26S proteasome regulatory subunit 10B OS=Homo sapiens OX=9606 GN=PSMC6 PE=1 SV=1	11	4	8	45.8	PSMC6	451776	189063	47859	160583	267609	474005
26S proteasome regulatory subunit 6A OS=Homo sapiens OX=9606 GN=PSMC3 PE=1 SV=3	6	3	8	49.2	PSMC3	179517	52473.2	71172	253277	182706	183128
28S ribosomal protein S34, mitochondrial OS=Homo sapiens OX=9606 GN=MRPS34 PE=1 SV=2	10	2	8	26.3	MRPS34	97255.4	112696	9638.42	77612.5	98148.4	388591
2-oxoglutarate dehydrogenase, mitochondrial OS=Homo sapiens OX=9606 GN=OGDH PE=1 SV=1	5	4	8	117.2	OGDH	220247	33354.1	29960.5	174494	144400	172078
40S ribosomal protein S15 OS=Homo sapiens OX=9606 GN=RPS15 PE=1 SV=2	22	2	8	16.6		243802	120000	66342	1.54089e+06	931482	679856
4-trimethylaminobutyraldehyde dehydrogenase OS=Homo sapiens OX=9606 GN=ALDH9A1 PE=1 SV=3	11	4	8	53.8	ALDH9A1	100665	12269.4	4035.23	18553.4	11781.2	49385.7
60S ribosomal protein L35a OS=Homo sapiens OX=9606 GN=RPL35A PE=1 SV=2	25	3	8	12.5	RPL35A	573132	239429	22507.6	385607	242578	252734
60S ribosomal protein L37a OS=Homo sapiens OX=9606 GN=RPL37A PE=1 SV=2	28	2	8	10.3	RPL37A	123760	79895	30661.5	205152	164304	193786
Acetyltransferase component of pyruvate dehydrogenase complex OS=Homo sapiens OX=9606 GN=DLAT PE=1 SV=1	12	3	8	57.6		1.28301e+06	48007	9894.63	72870.8	55485.5	71281.5
Acylamino-acid-releasing enzyme OS=Homo sapiens OX=9606 GN=APEH PE=1 SV=4	3	2	8	81.2	APEH	84473.3	26833.9	30229.1	64673	68574.3	30392.6
ADP-ribosylation factor 3 OS=Homo sapiens OX=9606 GN=ARF3 PE=1 SV=2	14	2	8	20.6	ARF3	113928	6287.72		15802.7
ADP-ribosylation factor 5 (Fragment) OS=Homo sapiens OX=9606 GN=ARF5 PE=1 SV=1	14	2	8	17.1		518770	432245	68517.3	609546	377513	381890
AH receptor-interacting protein OS=Homo sapiens OX=9606 GN=AIP PE=1 SV=2	12	3	8	37.6	AIP	418960	131051	30864.4	104872	145758	232387
Alpha-1,6-mannosyl-glycoprotein 2-beta-N-acetylglucosaminyltransferase OS=Homo sapiens OX=9606 GN=MGAT2 PE=1 SV=1	8	4	8	51.5	MGAT2	268058	214160	95328.7	277129	202797	248136
Alpha-catulin OS=Homo sapiens OX=9606 GN=CTNNAL1 PE=1 SV=2	4	3	8	81.8	CTNNAL1	789204	772994	318646	994336	827613	894335
Aminoacyl tRNA synthase complex-interacting multifunctional protein 1 OS=Homo sapiens OX=9606 GN=AIMP1 PE=1 SV=2	12	3	8	34.3	AIMP1	260971	42290.8	5462.09	364076	293982	379995
Angiopoietin-related protein 2 OS=Homo sapiens OX=9606 GN=ANGPTL2 PE=1 SV=1	7	3	8	57.1	ANGPTL2	115166	74356.4	48219.7	323340	267216	215809
ATP-binding cassette sub-family D member 3 OS=Homo sapiens OX=9606 GN=ABCD3 PE=1 SV=2	3	2	8	75.4		103663	118072	48214.4	275827	152175	202781
ATP-binding cassette sub-family E member 1 OS=Homo sapiens OX=9606 GN=ABCE1 PE=1 SV=1	13	6	8	67.3	ABCE1	1.08854e+06	189966	88575.2	414920	262075	227006
B-cell receptor-associated protein OS=Homo sapiens OX=9606 GN=BCAP31 PE=1 SV=1	9	2	8	24.1		228078	153328	53385.7	430398	265629	306673
Beta-MPP OS=Homo sapiens OX=9606 GN=PMPCB PE=1 SV=1	9	4	8	54.2	PMPCB	857464	104898	65430	209761	150812	150026
Bloom syndrome protein OS=Homo sapiens OX=9606 GN=BLM PE=1 SV=1	5	6	8	158.9	BLM	577633	46720.5	15547.8	104977	56627.9	61438.3
Brain-specific angiogenesis inhibitor 1-associated protein 2 OS=Homo sapiens OX=9606 GN=BAIAP2 PE=1 SV=1	9	3	8	61.3	BAIAP2	40777.5	74717	43087.6	155780	133270	222084
Calcium-binding and coiled-coil domain-containing protein 1 OS=Homo sapiens OX=9606 GN=CALCOCO1 PE=1 SV=2	9	5	8	77.3	CALCOCO1	66827.7	22867.2	5758.63	402089	469995	520040
Cell division cycle 27, isoform CRA_c OS=Homo sapiens OX=9606 GN=CDC27 PE=1 SV=1	10	5	8	91.7	CDC27	194485	40731.6	18755.8	156398	82089.6	68039.1
Centrosomal protein of 55 kDa OS=Homo sapiens OX=9606 GN=CEP55 PE=1 SV=3	5	2	8	54.1	CEP55	239264	178425	94722.2	259910	167278	112594
Cleavage and polyadenylation specificity factor subunit 2 OS=Homo sapiens OX=9606 GN=CPSF2 PE=1 SV=2	6	4	8	88.4	CPSF2	228114	119447	63228.3	290532	274135	234392
Coatomer subunit gamma-2 OS=Homo sapiens OX=9606 GN=COPG2 PE=1 SV=1	7	5	8	97.6	COPG2	75818.4		8204.52	18700.5	27837.4
Constitutive coactivator of PPAR-gamma-like protein 2 OS=Homo sapiens OX=9606 GN=FAM120C PE=1 SV=2	4	3	8	99.3	FAM120C	358685	458198	393121	352336	392965	492615
Cyclin-dependent kinase 16 OS=Homo sapiens OX=9606 GN=CDK16 PE=1 SV=1	7	4	8	55.7	CDK16	103211	49027.9	17596.3	95416.7	70157.1	66136.1
Cyclin-dependent kinase 9 OS=Homo sapiens OX=9606 GN=CDK9 PE=1 SV=3	8	4	8	42.8	CDK9	140317	51489.3	5079.93	63794.2	46822.5	32466.1
DNA topoisomerase 2-beta OS=Homo sapiens OX=9606 GN=TOP2B PE=1 SV=3	3	4	8	183.2	TOP2B	293710	32996.2	5525.93	53879.1	64128.2	84379
DNA-directed RNA polymerase II subunit RPB3 OS=Homo sapiens OX=9606 GN=POLR2C PE=1 SV=2	16	4	8	31.4	POLR2C	647819	585720	386966	963727	851851	767030
Double-stranded RNA-specific adenosine deaminase OS=Homo sapiens OX=9606 GN=ADAR PE=1 SV=4	4	3	8	136	ADAR	154506	60768.2	14390.7	136294	85475.7	104085
Drebrin-like protein OS=Homo sapiens OX=9606 GN=DBNL PE=1 SV=1	6	2	8	48.2	DBNL	190631	65493.2	12341.8	144608	46352.9	124615
Dynactin subunit 1 OS=Homo sapiens OX=9606 GN=DCTN1 PE=1 SV=3	4	4	8	141.6	DCTN1	187545	57202.2	39787.8	138684	215500	104529
E3 ubiquitin-protein ligase SH3RF2 OS=Homo sapiens OX=9606 GN=SH3RF2 PE=1 SV=3	6	3	8	79.3	SH3RF2	54220.8	92164.7	35287.6	147331	148629	195599
EH domain-containing protein 1 OS=Homo sapiens OX=9606 GN=EHD1 PE=1 SV=1	11	5	8	61.9	EHD1	224668	119758	78120.2	342462	228798	158831
EH domain-containing protein 2 OS=Homo sapiens OX=9606 GN=EHD2 PE=1 SV=2	4	2	8	61.1	EHD2	744459	759127	308986	767063	431702	628439
Enhancer of rudimentary homolog OS=Homo sapiens OX=9606 GN=ERH PE=1 SV=1	17	1	8	8.2		1.96704e+06	2.31878e+06	662931	2.1336e+06	2424754	2.63708e+06
Eukaryotic translation initiation factor 5B OS=Homo sapiens OX=9606 GN=EIF5B PE=1 SV=4	4	4	8	138.7	EIF5B	414491	23725.3	4914.6	243363	201927	197226
Evolutionarily conserved signaling intermediate in Toll pathway, mitochondrial OS=Homo sapiens OX=9606 GN=ECSIT PE=1 SV=1	11	3	8	49.1	ECSIT	315871	293930	124550	597730	590015	684830
Exosome complex component MTR3 OS=Homo sapiens OX=9606 GN=EXOSC6 PE=1 SV=1	9	2	8	28.2	EXOSC6	203050	104207	73116.4	311934	216853	185067
FERM domain-containing protein 4A OS=Homo sapiens OX=9606 GN=FRMD4A PE=1 SV=3	3	2	8	115.4	FRMD4A	80851.7	53885.7	29457.2	80079.3	73746.3	62848.7
Glucose-6-phosphate 1-dehydrogenase OS=Homo sapiens OX=9606 GN=G6PD PE=1 SV=4	10	5	8	59.2	G6PD	746594	105881	73393.9	371108	278832	265037
Glutathione peroxidase OS=Homo sapiens OX=9606 GN=GPX1 PE=1 SV=1	19	3	8	21.9		44877.7	34401.1	24564.4	148879	104562	112188
Glutathione S-transferase omega-1 OS=Homo sapiens OX=9606 GN=GSTO1 PE=1 SV=2	14	3	8	27.5	GSTO1	748884	130736	64455.5	238085	131242	204557
Guanine nucleotide-binding protein-like 3 OS=Homo sapiens OX=9606 GN=GNL3 PE=1 SV=2	3	2	8	62	GNL3	150294	96845.1	24956.6	140163	124781	242814
Hexokinase OS=Homo sapiens OX=9606 GN=HK2 PE=1 SV=1	7	6	8	98.9		699636	99070.8	35587.4	38292.2	25840.3	35056.2
Inactive tyrosine-protein kinase PEAK1 OS=Homo sapiens OX=9606 GN=PEAK1 PE=1 SV=4	3	4	8	193	PEAK1	84576.9	67404.7	29165.8	147216	109226	139158
Inhibitor of nuclear factor kappa-B kinase-interacting protein OS=Homo sapiens OX=9606 GN=IKBIP PE=1 SV=1	9	3	8	39.3	IKBIP	90604.3	138079	90331.3	263023	211961	213512
Interleukin-1 receptor-associated kinase 1 (Fragment) OS=Homo sapiens OX=9606 GN=IRAK1 PE=1 SV=1	12	2	8	29		72622.6	16112.3	6994.19	48814	53587.7	46309.7
Kelch-like ECH-associated protein 1 OS=Homo sapiens OX=9606 GN=KEAP1 PE=1 SV=2	3	2	8	69.6	KEAP1	443887	142046	71649.1	86353.5	74441.6	98458.9
Kin of IRRE-like protein 1 OS=Homo sapiens OX=9606 GN=KIRREL1 PE=1 SV=2	7	4	8	83.5	KIRREL; KIRREL1	144014	95334.4	85592.4	209945	192100	102453
LanC-like protein 2 OS=Homo sapiens OX=9606 GN=LANCL2 PE=1 SV=1	8	3	8	50.8	LANCL2	166307	196877	52823.2	312128	208454	156825
Leucine-rich repeat and calponin homology domain-containing protein 4 OS=Homo sapiens OX=9606 GN=LRCH4 PE=1 SV=2	9	3	8	73.4	LRCH4	172971	52875.9	31951.4	121008	120802	96039.6
Leucine-rich repeat flightless-interacting protein 1 OS=Homo sapiens OX=9606 GN=LRRFIP1 PE=1 SV=2	9	6	8	89.2	LRRFIP1	2.03748e+06	145574	144403	256111	180606	131762
Low-density lipoprotein receptor-related protein 10 OS=Homo sapiens OX=9606 GN=LRP10 PE=1 SV=2	7	3	8	76.1	LRP10	63250.2	33195.1	16423.3	80183.7	54069.3	48546.5
MAGUK p55 subfamily member 5 OS=Homo sapiens OX=9606 GN=MPP5 PE=1 SV=3	5	3	8	77.2	MPP5	149706	177096	74237.6	265308	171377	174503
Mitotic checkpoint protein BUB3 OS=Homo sapiens OX=9606 GN=BUB3 PE=1 SV=1	14	4	8	37.1	BUB3	399844	117382	49267	338901	215704	127925
Myelin expression factor 2 OS=Homo sapiens OX=9606 GN=MYEF2 PE=1 SV=3	10	4	8	64.1	MYEF2	118622	85819.9	32496.4	176768	191900	205333
N-acetyl-D-glucosamine kinase OS=Homo sapiens OX=9606 GN=NAGK PE=1 SV=4	13	3	8	37.4	NAGK	31851	53421.6	51952	224803	162767	95309.2
Nuclear pore complex protein Nup93 OS=Homo sapiens OX=9606 GN=NUP93 PE=1 SV=1	7	5	8	99.5		1.14399e+06	178539	42064.5	209665	117756	109516
Numb-like protein OS=Homo sapiens OX=9606 GN=NUMBL PE=1 SV=1	14	4	8	60.8	NUMBL		10028.6		451357	367220	473178
PDZ and LIM domain protein 1 OS=Homo sapiens OX=9606 GN=PDLIM1 PE=1 SV=4	9	2	8	36	PDLIM1	593273	82853.7	55131.3	66382.4	60601.6	67830.5
Peroxiredoxin-5, mitochondrial OS=Homo sapiens OX=9606 GN=PRDX5 PE=1 SV=4	19	3	8	22.1	PRDX5	269135	138848	22249.5	126415	94245.4	195753
Phosphatidylethanolamine-binding protein 1 OS=Homo sapiens OX=9606 GN=PEBP1 PE=1 SV=3	22	3	8	21	PEBP1	298886	57467.6	33253.6	114569	60191.4	87647.3
Phosphatidylinositol 3-kinase catalytic subunit type 3 OS=Homo sapiens OX=9606 GN=PIK3C3 PE=1 SV=2	4	3	8	94.3	PIK3C3	180171	135850	46377.9	187315	149592	169574
Pre-mRNA-processing factor 19 OS=Homo sapiens OX=9606 GN=PRPF19 PE=1 SV=1	13	5	8	55.1	PRPF19	413710	149370	12064.5	296397	121571	210777
Probable ATP-dependent RNA helicase DDX20 OS=Homo sapiens OX=9606 GN=DDX20 PE=1 SV=2	5	3	8	92.2	DDX20	311445	177253	44849.5	200911	153653	179384
Protein numb homolog OS=Homo sapiens OX=9606 GN=NUMB PE=1 SV=2	5	3	8	70.8	NUMB	91266.6	41084.4	36638.6	2.22309e+06	1701638	1.36313e+06
Protein pelota homolog OS=Homo sapiens OX=9606 GN=PELO PE=1 SV=2	10	4	8	43.3	PELO	574922	302027	133270	425321	417359	541424
Protein rogdi homolog (Fragment) OS=Homo sapiens OX=9606 GN=ROGDI PE=1 SV=8	23	4	8	27.9		1.02412e+06	1.07231e+06	262215	924587	1.12784e+06	1.43345e+06
Protein SGT1 homolog OS=Homo sapiens OX=9606 GN=SUGT1 PE=1 SV=3	12	4	8	41	SUGT1	760929	372796	49811	156368	525065	384992
Protein transport protein SEC23 OS=Homo sapiens OX=9606 GN=SEC23A PE=1 SV=1	4	2	8	82.9	SEC23A	228541	232369	91932.2	223633	195342	339618
Protein transport protein Sec61 subunit beta OS=Homo sapiens OX=9606 GN=SEC61B PE=1 SV=2	39	3	8	10	SEC61B	448441	385839	188679	623058	468888	404831
Protein-serine/threonine phosphatase (Fragment) OS=Homo sapiens OX=9606 GN=PPM1B PE=1 SV=1	16	5	8	41.8		2.04494e+06		10445.9	32533.3
Pumilio homolog 1 (Fragment) OS=Homo sapiens OX=9606 GN=PUM1 PE=1 SV=1	4	3	8	120.2		282442	253983	64850.8	230718	201858	200886
Putative protein FAM10A4 OS=Homo sapiens OX=9606 GN=ST13P4 PE=5 SV=1	15	3	8	27.4	ST13P4	909753	222354	187328	476184	330042	219866
Ras-related protein Rab-6A OS=Homo sapiens OX=9606 GN=RAB6A PE=1 SV=3	24	4	8	23.6	RAB6A	1.74523e+06	1.62751e+06	402259	1.63766e+06	1.12911e+06	1.73588e+06
Retinal dehydrogenase 2 OS=Homo sapiens OX=9606 GN=ALDH1A2 PE=1 SV=3	8	3	8	56.7	ALDH1A2	20772.5
Rho GTPase-activating protein 23 OS=Homo sapiens OX=9606 GN=ARHGAP23 PE=1 SV=2	2	2	8	162.1	ARHGAP23	74574.4	54486.2	31255.2	135949	114278	106733
SAP domain-containing ribonucleoprotein OS=Homo sapiens OX=9606 GN=SARNP PE=1 SV=3	23	4	8	23.7	SARNP	546624	28935.6	54530.4	111375	115759	84830.6
Septin-10 OS=Homo sapiens OX=9606 GN=SEPTIN10 PE=1 SV=2	5	2	8	52.6	SEPT10	207506	262129	59410.4	395239	288872	287929
Serine/arginine-rich splicing factor 1 OS=Homo sapiens OX=9606 GN=SRSF1 PE=1 SV=1	15	3	8	28.3	SRSF1	741812	408265	177847	626887	518117	591161
Serine/threonine-protein kinase N1 OS=Homo sapiens OX=9606 GN=PKN1 PE=1 SV=2	7	5	8	103.9	PKN1	120185	18627.5	11900.2	83096.8	66125.4	48350.5
Serine/threonine-protein phosphatase 6 regulatory ankyrin repeat subunit A OS=Homo sapiens OX=9606 GN=ANKRD28 PE=1 SV=5	5	4	8	112.9	ANKRD28	52242.5	37087.9	9492.37	331650	308915	391721
Serine/threonine-protein phosphatase PGAM5, mitochondrial OS=Homo sapiens OX=9606 GN=PGAM5 PE=1 SV=2	15	4	8	32	PGAM5	668476	241381	180610	696393	569116	344823
Signal recognition particle 54 kDa protein OS=Homo sapiens OX=9606 GN=SRP54 PE=1 SV=1	6	3	8	55.7	SRP54	285854	235218	121851	353860	240079	197468
Signal recognition particle receptor subunit alpha OS=Homo sapiens OX=9606 GN=SRPRA PE=1 SV=2	9	5	8	69.8	SRPR; SRPRA	458852	113978	42279.2	220806	174899	231707
Sodium/potassium-transporting ATPase subunit beta-1 OS=Homo sapiens OX=9606 GN=ATP1B1 PE=1 SV=1	9	2	8	35	ATP1B1	293207	328108	191676	469291	381697	502825
Splicing factor 3A subunit 1 OS=Homo sapiens OX=9606 GN=SF3A1 PE=1 SV=1	11	6	8	88.8	SF3A1	681689	388150	111880	460651	394218	428803
Splicing factor 3B subunit 2 OS=Homo sapiens OX=9606 GN=SF3B2 PE=1 SV=2	4	3	8	100.2	SF3B2	328943	211037	38287.7	531923	415574	528354
Splicing factor 45 OS=Homo sapiens OX=9606 GN=RBM17 PE=1 SV=1	8	4	8	44.9	RBM17	346593	414828	105151	486254	305722	339433
Stonin-2 OS=Homo sapiens OX=9606 GN=STON2 PE=1 SV=1	4	3	8	101.1	STON2	31301.8			229705	226820	272433
SWI/SNF-related matrix-associated actin-dependent regulator of chromatin subfamily A-like protein 1 OS=Homo sapiens OX=9606 GN=SMARCAL1 PE=1 SV=1	6	4	8	105.9	SMARCAL1	187477	107052	69229.5	200648	87400	191829
Syntaxin-7 OS=Homo sapiens OX=9606 GN=STX7 PE=1 SV=4	17	3	8	29.8	STX7	170405	56569.6	21197	171043	64812.3	100549
TATA-binding protein-associated factor 172 OS=Homo sapiens OX=9606 GN=BTAF1 PE=1 SV=1	4	6	8	206.8		212030	144889	96993.4	175398	159757	158401
TBC1 domain family member 23 OS=Homo sapiens OX=9606 GN=TBC1D23 PE=1 SV=3	8	4	8	78.3	TBC1D23	230812	197025	128634	319954	259131	234517
TGF-beta-activated kinase 1 and MAP3K7-binding protein 2 OS=Homo sapiens OX=9606 GN=TAB2 PE=1 SV=1	9	4	8	76.4	TAB2	77823.9	67725.6	39725.1	37830.7	40916.5	51366.4
Thioredoxin-dependent peroxide reductase, mitochondrial OS=Homo sapiens OX=9606 GN=PRDX3 PE=1 SV=3	17	4	8	27.7	PRDX3	1.53171e+06	159243	76112.7	243360	191807	357884
Transcription factor GATA-6 OS=Homo sapiens OX=9606 GN=GATA6 PE=1 SV=2	6	2	8	60	GATA6	223968	370836	181949	479330	351674	457991
Transmembrane protein 214 OS=Homo sapiens OX=9606 GN=TMEM214 PE=1 SV=2	6	4	8	77.1	TMEM214	179648	169875	72064.9	329635	201357	224846
Tyrosine-protein phosphatase non-receptor type 9 OS=Homo sapiens OX=9606 GN=PTPN9 PE=1 SV=1	4	2	8	66.9		82788.2	75131.4	26499.4	71271	83575.6	119764
WD repeat-containing protein 7 OS=Homo sapiens OX=9606 GN=WDR7 PE=1 SV=2	4	4	8	163.7	WDR7	202375	190413	64801.1	269715	233821	155210
Zinc finger HIT domain-containing protein 2 OS=Homo sapiens OX=9606 GN=ZNHIT2 PE=1 SV=1	6	2	8	42.9	ZNHIT2	92500	99207.8	32323.1	120502	99567.6	111731
Zinc finger RNA-binding protein OS=Homo sapiens OX=9606 GN=ZFR PE=1 SV=2	9	6	8	116.9	ZFR	262683	44329.9	16133.4	84097.8	47666.6	37457.5
[F-actin]-monooxygenase MICAL2 OS=Homo sapiens OX=9606 GN=MICAL2 PE=1 SV=1	2	2	7	126.6	MICAL2	183100	124895	58500.4	200540	124734	147259
2,4-dienoyl-CoA reductase, mitochondrial OS=Homo sapiens OX=9606 GN=DECR1 PE=1 SV=1	7	2	7	36	DECR1	291912	131675	46196.5	166143	107987	182954
26S proteasome non-ATPase regulatory subunit 14 OS=Homo sapiens OX=9606 GN=PSMD14 PE=1 SV=1	15	3	7	34.6	PSMD14	453472	188801	84476.3	209148	181222	327655
26S proteasome non-ATPase regulatory subunit 8 OS=Homo sapiens OX=9606 GN=PSMD8 PE=1 SV=2	4	2	7	39.6	PSMD8	100277	114005	62055.6	158668	146378	288602
26S proteasome non-ATPase regulatory subunit 9 (Fragment) OS=Homo sapiens OX=9606 GN=PSMD9 PE=1 SV=1	20	3	7	16.9		351112	61677.7	49275.5	154907	123646	82372.9
28S ribosomal protein S22, mitochondrial OS=Homo sapiens OX=9606 GN=MRPS22 PE=1 SV=1	8	3	7	41.3	MRPS22	232709	90705.6	61553.8	331208	320621	316359
2-phospho-D-glycerate hydro-lyase OS=Homo sapiens OX=9606 GN=ENO2 PE=1 SV=1	15	3	7	34.7		3.78638e+06	651484	402449	786184	559491	804955
40S ribosomal protein S24 OS=Homo sapiens OX=9606 GN=RPS24 PE=1 SV=1	20	4	7	15.2		398502	98675.5	22849.7	387925	270469	816761
5'-AMP-activated protein kinase subunit gamma-1 OS=Homo sapiens OX=9606 GN=PRKAG1 PE=1 SV=1	10	3	7	37.6	PRKAG1	306865	145201	71659.2	134157	334653	90441.2
5'-nucleotidase domain-containing protein 2 OS=Homo sapiens OX=9606 GN=NT5DC2 PE=1 SV=1	6	3	7	60.7	NT5DC2	464272	243671	86551.9	245977	149894	70784.6
Active breakpoint cluster region-related protein OS=Homo sapiens OX=9606 GN=ABR PE=1 SV=2	4	3	7	97.5	ABR	238890	232307	85529.5	331479	269415	331606
Adipocyte plasma membrane-associated protein (Fragment) OS=Homo sapiens OX=9606 GN=APMAP PE=1 SV=1	6	2	7	45.4		172835	135339	93129.1	361105	169468	149147
Aladin OS=Homo sapiens OX=9606 GN=AAAS PE=1 SV=1	9	4	7	59.5	AAAS	294074	287976	120064	262572	120398	400158
Alpha-tubulin N-acetyltransferase 1 OS=Homo sapiens OX=9606 GN=ATAT1 PE=1 SV=1	10	3	7	46.8	ATAT1	202161	197714	124125	200794	205922	175589
Ankyrin repeat and zinc finger domain-containing protein 1 OS=Homo sapiens OX=9606 GN=ANKZF1 PE=1 SV=1	12	4	7	57.5	ANKZF1	1.26799e+06	469177	374917	705561	487271	280608
AP-3 complex subunit sigma-1 OS=Homo sapiens OX=9606 GN=AP3S1 PE=1 SV=1	15	3	7	21.7	AP3S1	228360	182468	72578.6	259471	232623	227523
Armadillo repeat-containing X-linked protein 3 OS=Homo sapiens OX=9606 GN=ARMCX3 PE=1 SV=1	11	3	7	42.5	ARMCX3	51176.5	44577.6	19675	84321.1	77986.2	65865
ATP synthase F(0) complex subunit B1, mitochondrial OS=Homo sapiens OX=9606 GN=ATP5PB PE=1 SV=2	9	2	7	28.9	ATP5F1	568962	290502	190723	673199	449956	321144
ATP-dependent RNA helicase DDX19A OS=Homo sapiens OX=9606 GN=DDX19A PE=1 SV=1	10	3	7	50.5	DDX19A	192871	53921.4	33353.6	97731.7	78213.4	75936.1
Biorientation of chromosomes in cell division protein 1-like 1 OS=Homo sapiens OX=9606 GN=BOD1L1 PE=1 SV=2	3	6	7	330.3	BOD1L1	273141
BRISC and BRCA1-A complex member 1 (Fragment) OS=Homo sapiens OX=9606 GN=BABAM1 PE=1 SV=1	19	2	7	24.6		209681	34155.4	25584	161557	80614.4	78292.5
Calcium/calmodulin-dependent protein kinase type II subunit beta OS=Homo sapiens OX=9606 GN=CAMK2B PE=1 SV=3	10	5	7	72.6	CAMK2B	127734	228081	60181.4	170724	184178	269812
Caldesmon OS=Homo sapiens OX=9606 GN=CALD1 PE=1 SV=1	9	3	7	64.1		46454.1	155426	39364	169829	130028	128922
Carbonyl reductase [NADPH] 3 OS=Homo sapiens OX=9606 GN=CBR3 PE=1 SV=3	9	2	7	30.8	CBR3	183454	237463	78567.6	160793	128862	245764
Casein kinase II subunit alpha' OS=Homo sapiens OX=9606 GN=CSNK2A2 PE=1 SV=1	11	3	7	41.2	CSNK2A2	226047	173578	81692.6	431127	344588	356508
CD44 antigen OS=Homo sapiens OX=9606 GN=CD44 PE=1 SV=2	22	4	7	22.7		207640	144665	517017	1.01935e+06	386738	300074
Cell division cycle protein 20 homolog OS=Homo sapiens OX=9606 GN=CDC20 PE=1 SV=2	10	3	7	54.7	CDC20	54345.6	89329.5	31847.6	116419	86273.5	102193
Cleavage and polyadenylation specificity factor subunit 6 OS=Homo sapiens OX=9606 GN=CPSF6 PE=1 SV=1	6	2	7	52.2		307713	126171	39724.1	156815	129212	91893.9
Cofilin-2 OS=Homo sapiens OX=9606 GN=CFL2 PE=1 SV=1	19	3	7	18.7	CFL2	67666.7					18981.3
Coiled-coil domain-containing protein 85C OS=Homo sapiens OX=9606 GN=CCDC85C PE=1 SV=1	11	2	7	45.2	CCDC85C	38208.6	28128.8	25926.4	60962.6	75204.3	41882.7
Collagen alpha-1(XII) chain OS=Homo sapiens OX=9606 GN=COL12A1 PE=1 SV=2	1	3	7	332.9	COL12A1		56730.4		53935.5	23696.3	15953.7
Copine-7 OS=Homo sapiens OX=9606 GN=CPNE7 PE=1 SV=1	4	2	7	70.2	CPNE7	45032.6	39838.1	7980.83	51292.3	41558.4	67459.4
Cyclin-dependent kinase 18 OS=Homo sapiens OX=9606 GN=CDK18 PE=1 SV=4	6	3	7	54.4			31109.6	14733.4	110989	113308	96020.9
DDB1- and CUL4-associated factor 7 OS=Homo sapiens OX=9606 GN=DCAF7 PE=1 SV=1	10	3	7	38.9	DCAF7	247035	263290	53290.4	253469	253739	339887
Dehydrogenase/reductase SDR family member 7B OS=Homo sapiens OX=9606 GN=DHRS7B PE=1 SV=1	13	3	7	33.5	DHRS7B	86266.6	87618.2	18509.2	55955.6	74589.5	97584.2
Desmoglein-2 OS=Homo sapiens OX=9606 GN=DSG2 PE=1 SV=2	4	3	7	122.2	DSG2	79197.1	14416.4	20732.3	59650.4	86783.8	82806.6
Digestive organ expansion factor homolog OS=Homo sapiens OX=9606 GN=DIEXF PE=1 SV=2	6	5	7	87	DIEXF	92313.3	67323.6	20445.3	1.60303e+06	1.06752e+06	1.19701e+06
DNA topoisomerase 1 OS=Homo sapiens OX=9606 GN=TOP1 PE=1 SV=2	6	4	7	90.7	TOP1	2.16875e+06	16888	10363.4	173370	131588	135666
DNA topoisomerase 2-alpha OS=Homo sapiens OX=9606 GN=TOP2A PE=1 SV=3	4	5	7	174.3	TOP2A	677627	22062.1	5356.04	45221.3	53247.4	48830.6
DNA-directed RNA polymerase II subunit E OS=Homo sapiens OX=9606 GN=POLR2E PE=1 SV=1	13	2	7	21.4		402180	140710	88128.3	235328	214132	237196
Dual specificity protein phosphatase 23 OS=Homo sapiens OX=9606 GN=DUSP23 PE=1 SV=1	13	2	7	16.6	DUSP23	289335	306005	82651.5	217342	213157	289101
EGF-like repeat and discoidin I-like domain-containing protein 3 OS=Homo sapiens OX=9606 GN=EDIL3 PE=1 SV=1	8	3	7	53.7	EDIL3	276118	346056	114850	100237	67063.5	54901.7
Epidermal growth factor receptor kinase substrate 8-like protein 2 OS=Homo sapiens OX=9606 GN=EPS8L2 PE=1 SV=1	6	4	7	88		94563	91543.5	34756.7	127072	106558	113543
Erlin-1 OS=Homo sapiens OX=9606 GN=ERLIN1 PE=1 SV=2	12	3	7	39.1		88846.3	77600.4	7549.45	114373	76628.6	168776
Eukaryotic translation initiation factor 4B OS=Homo sapiens OX=9606 GN=EIF4B PE=1 SV=1	12	6	7	69.7	EIF4B	1.06425e+06	59712.3	32767.7	138164	88702.9	37509.7
FERM, ARHGEF and pleckstrin domain-containing protein 2 OS=Homo sapiens OX=9606 GN=FARP2 PE=1 SV=3	4	3	7	119.8	FARP2	89590.6	50863.7	6950.05	43322.4	50787.7	29368.4
Flotillin (Fragment) OS=Homo sapiens OX=9606 GN=FLOT1 PE=1 SV=1	17	4	7	39.8		207508	29079.2	21417.8	53454	46896	18545.8
G patch domain and ankyrin repeat-containing protein 1 OS=Homo sapiens OX=9606 GN=GPANK1 PE=1 SV=1	12	3	7	39.3	GPANK1	27856.5	28280.8	14156.7	69574.3	58872.2	52592.8
Gasdermin-E OS=Homo sapiens OX=9606 GN=GSDME PE=1 SV=2	7	3	7	54.5	DFNA5; GSDME	51910.3	60620.3	33389.7	193222	127532	173325
Glucose-6-phosphate isomerase OS=Homo sapiens OX=9606 GN=GPI PE=1 SV=1	16	4	7	35.4		283390	54398.7	79801.8	70351.4	86712	194325
Glucose-fructose oxidoreductase domain-containing protein 1 OS=Homo sapiens OX=9606 GN=GFOD1 PE=1 SV=1	12	4	7	43.1	GFOD1		27041.8		183168	223147	381763
Golgin subfamily A member 2 OS=Homo sapiens OX=9606 GN=GOLGA2 PE=4 SV=1	5	4	7	111.6		105085	30846.4	4117.11	96174.1	107104	66187.7
GRB10-interacting GYF protein 1 OS=Homo sapiens OX=9606 GN=GIGYF1 PE=1 SV=2	3	2	7	114.5	GIGYF1	75466.5	43403.3	22904.9	50229.9	45222.8	48508.6
Growth factor receptor-bound protein 2 OS=Homo sapiens OX=9606 GN=GRB2 PE=1 SV=1	13	3	7	25.2	GRB2	542357	377072	145903	749293	606193	739477
Guanine nucleotide-binding protein G(I)/G(S)/G(O) subunit gamma-12 OS=Homo sapiens OX=9606 GN=GNG12 PE=1 SV=3	38	2	7	8	GNG12	29531.9	153482	84052.6	166717	159303	164983
HCG2044799 OS=Homo sapiens OX=9606 GN=HNRNPUL2-BSCL2 PE=4 SV=1	7	4	7	84.6		77646	46647.6	19000.8	151689	116684	108371
Hemoglobin subunit zeta OS=Homo sapiens OX=9606 GN=HBZ PE=1 SV=2	23	3	7	15.6	HBZ	1.78093e+06	504314	47222.2	91602.4	244120	76208.3
Histone H1.10 OS=Homo sapiens OX=9606 GN=H1-10 PE=1 SV=1	26	4	7	22.5	H1FX	816439	100530	26793.4	430774	481779	446671
Importin subunit alpha-4 OS=Homo sapiens OX=9606 GN=KPNA3 PE=1 SV=2	4	2	7	57.8	KPNA3	184202	116911	85144.1	142647	167069	124490
Inner nuclear membrane protein Man1 OS=Homo sapiens OX=9606 GN=LEMD3 PE=1 SV=2	5	2	7	99.9	LEMD3	56716.6	30297.4	16305.9	56074.5	44299.2	30738.6
Inosine-5'-monophosphate dehydrogenase (Fragment) OS=Homo sapiens OX=9606 GN=IMPDH1 PE=1 SV=1	6	3	7	54.3		34499.3	7543.73		7206.93	11237.7	15960
Integrator complex subunit 6 OS=Homo sapiens OX=9606 GN=INTS6 PE=1 SV=1	5	3	7	100.3	INTS6	347111	381871	62693.1	487019	380725	368909
Integrin alpha-5 OS=Homo sapiens OX=9606 GN=ITGA5 PE=1 SV=2	2	2	7	114.5	ITGA5	185929	88725	47238.9	926907	957094	1.23124e+06
Inter-alpha-trypsin inhibitor heavy chain H3 OS=Homo sapiens OX=9606 GN=ITIH3 PE=1 SV=1	3	2	7	75		227719	141144	74915.1	398369	219705	182935
Jupiter microtubule-associated homolog 2 (Fragment) OS=Homo sapiens OX=9606 GN=JPT2 PE=1 SV=1	15	2	7	20.7		297022	61750.8	39050.8	157269	97935.1	94621.6
Kinesin-like protein KIF23 OS=Homo sapiens OX=9606 GN=KIF23 PE=1 SV=3	4	3	7	110	KIF23	94818.1	96667.2	41557.3	156009	127923	121658
Lipid droplet-regulating VLDL assembly factor AUP1 OS=Homo sapiens OX=9606 GN=AUP1 PE=1 SV=2	7	2	7	45.8		90564	65721.1	8456.34	97164.7	83028.3	113414
Lipoma-preferred partner OS=Homo sapiens OX=9606 GN=LPP PE=1 SV=1	7	4	7	65.7	LPP	115113	164784	52364.5	275973	253825	322720
Mediator of DNA damage checkpoint protein 1 OS=Homo sapiens OX=9606 GN=MDC1 PE=1 SV=3	9	7	7	226.5	MDC1	329522			11143.1
MICAL-like protein 2 OS=Homo sapiens OX=9606 GN=MICALL2 PE=1 SV=1	9	3	7	97.4	MICALL2	97592.7	49836.6	19135.6	106003	126484	105154
Mitochondrial import receptor subunit TOM22 homolog OS=Homo sapiens OX=9606 GN=TOMM22 PE=1 SV=3	42	3	7	15.5	TOMM22	348423	66587.6		133500	125853	226991
Mitochondrial proton/calcium exchanger protein OS=Homo sapiens OX=9606 GN=LETM1 PE=1 SV=1	4	2	7	83.3	LETM1	198552	109832	86277.5	228320	163990	195461
NADH dehydrogenase [ubiquinone] 1 alpha subcomplex assembly factor 3 OS=Homo sapiens OX=9606 GN=NDUFAF3 PE=1 SV=1	26	3	7	20.3	NDUFAF3	158353	39562.8	7104.37	160382	122710	86641.8
N-alpha-acetyltransferase 30 OS=Homo sapiens OX=9606 GN=NAA30 PE=1 SV=1	18	3	7	39.3	NAA30	225460	17436.1	11453.7	43470.7	34329.9	33445.7
Neurogenic locus notch homolog protein 2 OS=Homo sapiens OX=9606 GN=NOTCH2 PE=1 SV=3	1	2	7	265.2	NOTCH2	26048.4	157722	69756.7	164996	43707.8	229752
Nibrin OS=Homo sapiens OX=9606 GN=NBN PE=1 SV=1	4	2	7	84.9	NBN	94261.4	35756.9	12801.1	66369.4	57423.9	59139.4
Nuclear factor of-activated T-cells, cytoplasmic 3 (Fragment) OS=Homo sapiens OX=9606 GN=NFATC3 PE=1 SV=1	7	6	7	114.3		827002	13581.9	12368.6	39030.6	32174.7	18497.5
Nuclear receptor coactivator 5 OS=Homo sapiens OX=9606 GN=NCOA5 PE=1 SV=2	10	3	7	65.5	NCOA5	180383	128219	114498	233490	194761	130923
Nucleoside diphosphate kinase 7 OS=Homo sapiens OX=9606 GN=NME7 PE=1 SV=1	7	2	7	42.5	NME7	216578	191091	76090.8	231171	194715	230057
Paraneoplastic antigen Ma2 OS=Homo sapiens OX=9606 GN=PNMA2 PE=1 SV=2	9	4	7	41.5	PNMA2	345161	535461	81653.2	401570	361324	267119
Parkinson disease protein 7 OS=Homo sapiens OX=9606 GN=PARK7 PE=1 SV=2	30	4	7	19.9	PARK7	469830	104657	48178.7	107695	73037.8	114563
Pentatricopeptide repeat domain-containing protein 3, mitochondrial OS=Homo sapiens OX=9606 GN=PTCD3 PE=1 SV=3	5	3	7	78.5	PTCD3	237477	156204	87549.2	423874	362147	338972
Peroxisomal bifunctional enzyme OS=Homo sapiens OX=9606 GN=EHHADH PE=1 SV=3	8	4	7	79.4	EHHADH	160407	100069	6911.13	147706	130794	46822.1
Persulfide dioxygenase ETHE1, mitochondrial OS=Homo sapiens OX=9606 GN=ETHE1 PE=1 SV=1	25	2	7	10.6		156875	181670	58677.2	270176	193199	254362
Phosphatidylinositol-binding clathrin assembly protein OS=Homo sapiens OX=9606 GN=PICALM PE=1 SV=2	4	2	7	70.7	PICALM	217386	66092.1	35177.8	52135.1	83093.7	158166
Phospholipase A-2-activating protein OS=Homo sapiens OX=9606 GN=PLAA PE=1 SV=1	9	3	7	66.7		120306	26821.6	16647.3	111915	48728.2	37353.9
Pleckstrin homology domain-containing family N member 1 OS=Homo sapiens OX=9606 GN=PLEKHN1 PE=1 SV=3	8	3	7	66.4		37480.6	48593.4	42894.9	122138	87278.5	83197.3
Polymerase delta-interacting protein 2 OS=Homo sapiens OX=9606 GN=POLDIP2 PE=1 SV=1	7	2	7	42	POLDIP2	169387	160596	32069.8	220670	192897	279860
Pregnancy-specific beta-1-glycoprotein 4 (Fragment) OS=Homo sapiens OX=9606 GN=PSG4 PE=1 SV=1	12	3	7	32.8		543862	685239	248843	449093	422806	516967
PRKC apoptosis WT1 regulator protein OS=Homo sapiens OX=9606 GN=PAWR PE=1 SV=1	9	2	7	36.5	PAWR	114295	99935	88535.4	210067	191710	94809.3
Probable 28S rRNA (cytosine(4447)-C(5))-methyltransferase OS=Homo sapiens OX=9606 GN=NOP2 PE=1 SV=2	5	3	7	89.2	NOP2	224104		16858	96401.9	111118	120155
Probable rRNA-processing protein EBP2 OS=Homo sapiens OX=9606 GN=EBNA1BP2 PE=1 SV=2	11	2	7	34.8	EBNA1BP2	64514.1	12706.8	9370.34	23388.7	46717.1	45388.9
Proliferation-associated protein 2G4 OS=Homo sapiens OX=9606 GN=PA2G4 PE=1 SV=3	11	5	7	43.8	PA2G4	1.23109e+06	55411.3	36730	190162	100953	99658.9
Proteasomal ubiquitin receptor ADRM1 OS=Homo sapiens OX=9606 GN=ADRM1 PE=1 SV=1	9	2	7	37.5	ADRM1	482891	128992	88539.3	243740	163335	282256
Protein LSM12 homolog OS=Homo sapiens OX=9606 GN=LSM12 PE=1 SV=1	17	3	7	24.9		278119	68025.9	24182.2	85168.5	115305	115606
Protein RCC2 OS=Homo sapiens OX=9606 GN=RCC2 PE=1 SV=2	16	7	7	56	RCC2	3.35613e+06	5084.02	17575.9	70040.2	48502.1	61782.5
Protein SOGA1 OS=Homo sapiens OX=9606 GN=SOGA1 PE=1 SV=2	4	4	7	159.7	SOGA1	110207	46806.6	20021.5	131976	110688	101077
Protein WWC2 OS=Homo sapiens OX=9606 GN=WWC2 PE=1 SV=2	3	3	7	133.8	WWC2	125970	37131.9	40286.7	139142	128809	178012
Putative ATP-dependent RNA helicase DHX57 OS=Homo sapiens OX=9606 GN=DHX57 PE=1 SV=2	2	2	7	155.5	DHX57	16290.3	6405.8		28813.4	27246.6	36215.3
Rab11 family-interacting protein 2 OS=Homo sapiens OX=9606 GN=RAB11FIP2 PE=1 SV=1	6	2	7	58.2	RAB11FIP2	44507.8	54306.6	16256.1	98961	73769.9	54456.4
RalA-binding protein 1 OS=Homo sapiens OX=9606 GN=RALBP1 PE=1 SV=3	7	5	7	76	RALBP1	151248		22683.6	1.24299e+06	754355	498441
Ras-related protein Rab-13 OS=Homo sapiens OX=9606 GN=RAB13 PE=1 SV=1	16	3	7	22.8	RAB13	119058	52446.1	29007.3	113567	108658	97675.6
Ras-specific guanine nucleotide-releasing factor 2 OS=Homo sapiens OX=9606 GN=RASGRF2 PE=1 SV=2	5	4	7	140.7	RASGRF2	73030	26528.1	17702.8	85788.5	68075.7	38336.6
Regulator of telomere elongation helicase 1 OS=Homo sapiens OX=9606 GN=RTEL1-TNFRSF6B PE=3 SV=1	3	2	7	86.7		115831	88222.6	37235.7	82467.7	97660.3	155244
Regulatory-associated protein of mTOR OS=Homo sapiens OX=9606 GN=RPTOR PE=1 SV=1	3	3	7	148.9	RPTOR	87146	36742.2	13016.6	64930.8	67570.4	75899
Reticulocalbin-1 OS=Homo sapiens OX=9606 GN=RCN1 PE=1 SV=1	6	2	7	38.9	RCN1	885964	961976	285951	1.09905e+06	784833	926431
Rho GTPase-activating protein 21 OS=Homo sapiens OX=9606 GN=ARHGAP21 PE=1 SV=1	3	3	7	136.2		190829	50967.5	24987.2	78702.2	75924.5	113839
Rho-related GTP-binding protein RhoC (Fragment) OS=Homo sapiens OX=9606 GN=RHOC PE=1 SV=8	16	3	7	21.5		63699.4	29718.4	6283.46	34292.3	38323.5	99411.1
Ribosomal RNA small subunit methyltransferase NEP1 OS=Homo sapiens OX=9606 GN=EMG1 PE=1 SV=4	10	2	7	26.7	EMG1	244052	91324.7	42534.8	219929	210103	197332
RNA-binding protein EWS OS=Homo sapiens OX=9606 GN=EWSR1 PE=1 SV=1	5	2	7	64.9	EWSR1	920039	163869	190568	732067	505770	266829
Septin-11 OS=Homo sapiens OX=9606 GN=SEPTIN11 PE=1 SV=1	8	3	7	49.8		1.26684e+06	1.07806e+06	323139	1.22313e+06	1.07005e+06	1.13274e+06
Serine/arginine-rich splicing factor 2 (Fragment) OS=Homo sapiens OX=9606 GN=SRSF2 PE=1 SV=8	19	2	7	15.4		823936	159246	89029.2	448543	369596	513489
Serine/threonine-protein kinase 38 OS=Homo sapiens OX=9606 GN=STK38 PE=1 SV=1	10	4	7	54.2	STK38	1.11189e+06	26936.1	6710.03	51798	26536	16267.1
Serine/threonine-protein phosphatase 2A 55 kDa regulatory subunit B alpha isoform OS=Homo sapiens OX=9606 GN=PPP2R2A PE=1 SV=1	12	4	7	51.7	PPP2R2A	835077	81626.5	42017.5	196293	173340	59581
Serine-threonine kinase receptor-associated protein OS=Homo sapiens OX=9606 GN=STRAP PE=1 SV=1	20	5	7	38.4	STRAP	442421	234802	25764.7	234413	288991	401438
SH2B adapter protein 1 OS=Homo sapiens OX=9606 GN=SH2B1 PE=1 SV=3	8	3	7	79.3	SH2B1	88245.4	70615.3	32383.6	93688.7	81644.4	106130
Signal sequence receptor subunit alpha OS=Homo sapiens OX=9606 GN=SSR1 PE=1 SV=1	7	2	7	29.6		292754	284362	39266.7	1.41942e+06	1.13574e+06	493689
Small nuclear ribonucleoprotein Sm D2 OS=Homo sapiens OX=9606 GN=SNRPD2 PE=1 SV=1	16	2	7	13.5	SNRPD2	437311	277970	84936.2	419370	421883	330224
SRA stem-loop-interacting RNA-binding protein, mitochondrial OS=Homo sapiens OX=9606 GN=SLIRP PE=1 SV=1	19	2	7	13.9		920169	877202	266911	1.12065e+06	941124	1.449e+06
Target of rapamycin complex 2 subunit MAPKAP1 OS=Homo sapiens OX=9606 GN=MAPKAP1 PE=1 SV=2	7	3	7	59.1	MAPKAP1	1.05723e+06	1.13367e+06	228106	924539	608955	748059
TBC1 domain family member 5 OS=Homo sapiens OX=9606 GN=TBC1D5 PE=1 SV=1	5	3	7	88.9	TBC1D5	188437	122220	93125.3	174279	167652	169352
T-complex protein 1 subunit zeta-2 OS=Homo sapiens OX=9606 GN=CCT6B PE=1 SV=5	7	3	7	57.8	CCT6B	559276	42983.3	12813.5	54526.3	47217.2	85861.8
THUMP domain-containing protein 3 OS=Homo sapiens OX=9606 GN=THUMPD3 PE=1 SV=1	7	3	7	57	THUMPD3	461260	66139.6	47872.7	92947	81464.5	98345.1
Trafficking protein particle complex subunit 8 OS=Homo sapiens OX=9606 GN=TRAPPC8 PE=1 SV=1	5	3	7	104.2		107195	75068.4	7939.93	60097.5	64227.6	56423.5
Transcription factor 20 OS=Homo sapiens OX=9606 GN=TCF20 PE=1 SV=3	2	3	7	211.6	TCF20	118381	105075	17277.9	99312.7	75960.7	112720
Transcription factor p65 OS=Homo sapiens OX=9606 GN=RELA PE=1 SV=1	7	3	7	49.5	RELA	368777	166457	106898	290213	180440	296594
Transgelin (Fragment) OS=Homo sapiens OX=9606 GN=TAGLN PE=1 SV=1	21	3	7	16.8		129708	100758	61099.2	239510	141314	183431
Transmembrane protease serine 13 OS=Homo sapiens OX=9606 GN=TMPRSS13 PE=2 SV=5	3	2	7	63.1		2.01679e+07	184604	98086.5	264700	187457	248296
Trifunctional purine biosynthetic protein adenosine-3 OS=Homo sapiens OX=9606 GN=GART PE=1 SV=1	6	5	7	107.7	GART	2.23429e+06	128533	91748.1	380374	260394	536752
Tripartite motif-containing protein 14 OS=Homo sapiens OX=9606 GN=TRIM14 PE=1 SV=2	11	4	7	49.7	TRIM14	267286	178995	38907.4	251431	271320	602797
Tudor domain-containing protein 3 OS=Homo sapiens OX=9606 GN=TDRD3 PE=1 SV=1	6	3	7	73.1	TDRD3	1.09968e+06	533688	374931	2.08438e+06	1.92434e+06	1.79699e+06
Tudor-interacting repair regulator protein (Fragment) OS=Homo sapiens OX=9606 GN=NUDT16L1 PE=1 SV=1	9	2	7	21.9		167929	131081	26261	188207	118093	142187
U1 small nuclear ribonucleoprotein A OS=Homo sapiens OX=9606 GN=SNRPA PE=1 SV=3	17	4	7	31.3	SNRPA	329897	82764.6	24803.2	212826	154044	129241
Ubiquitin-protein ligase E3C OS=Homo sapiens OX=9606 GN=UBE3C PE=1 SV=3	5	4	7	123.8	UBE3C	127873	136931	19371	154886	110890	112230
Uncharacterized protein OS=Homo sapiens OX=9606 PE=3 SV=1	5	2	7	68.7		791099	651077	127832	470077	386255	516120
Unconventional myosin-IXb OS=Homo sapiens OX=9606 GN=MYO9B PE=1 SV=1	4	6	7	243.2		155568	74401.6	33810.3	272239	264887	279611
Utrophin OS=Homo sapiens OX=9606 GN=UTRN PE=1 SV=2	2	4	7	394.2	UTRN	34867.5	51935.7	4864.23	52790.7	20743.8
Vacuolar protein sorting-associated protein 26A OS=Homo sapiens OX=9606 GN=VPS26A PE=1 SV=1	13	2	7	26.2		196354	42566.3	32213.1	106737	74785.3	62027.6
Vinexin OS=Homo sapiens OX=9606 GN=SORBS3 PE=1 SV=2	4	2	7	75.3	SORBS3	59766.8	62295.1	7545.32	62249.7	52690.8	80427.7
V-type proton ATPase catalytic subunit A OS=Homo sapiens OX=9606 GN=ATP6V1A PE=1 SV=2	4	2	7	68.3	ATP6V1A	201807	99025.8	85013.8	166558	139219	157506
WD repeat-containing protein 20 OS=Homo sapiens OX=9606 GN=WDR20 PE=1 SV=2	5	2	7	62.9	WDR20	130260	178026	72062.2	238508	111647	156545
Zinc finger BED domain-containing protein 3 OS=Homo sapiens OX=9606 GN=ZBED3 PE=1 SV=1	12	2	7	25.1	ZBED3	528255	1.17659e+06	184841	559352	650837	272519
Zinc finger CCCH-type with G patch domain-containing protein OS=Homo sapiens OX=9606 GN=ZGPAT PE=1 SV=3	9	3	7	57.3	ZGPAT	56873.4	71854.9	14709.3	133183	78487.8	39500
Zinc finger FYVE domain-containing protein 16 OS=Homo sapiens OX=9606 GN=ZFYVE16 PE=1 SV=3	6	6	7	168.8	ZFYVE16	858145	17552	27376.9	62109.3	43173.5	8597.54
Zinc finger protein 318 OS=Homo sapiens OX=9606 GN=ZNF318 PE=1 SV=2	1	2	7	251	ZNF318	134728	64447.6	13625.8	108516	87214.8	130951
[Pyruvate dehydrogenase (acetyl-transferring)] kinase isozyme 2, mitochondrial OS=Homo sapiens OX=9606 GN=PDK2 PE=1 SV=2	5	2	6	46.1	PDK2	10491.2				13976.6	5001.15
1,25-dihydroxyvitamin D(3) 24-hydroxylase, mitochondrial OS=Homo sapiens OX=9606 GN=CYP24A1 PE=1 SV=2	4	2	6	58.8	CYP24A1	229718	120859	33881.5	203179	144407	159962
10 kDa heat shock protein, mitochondrial OS=Homo sapiens OX=9606 GN=HSPE1 PE=1 SV=1	32	3	6	10.7	HSPE1	698929	104044	60106.4	197607	109754	210338
1-phosphatidylinositol 4,5-bisphosphate phosphodiesterase delta-3 OS=Homo sapiens OX=9606 GN=PLCD3 PE=1 SV=3	5	3	6	89.2	PLCD3	137596	141835	62421.6	275734	215331	248475
26S proteasome regulatory subunit 6B OS=Homo sapiens OX=9606 GN=PSMC4 PE=1 SV=2	4	2	6	47.3	PSMC4	412250	262059	155234	361873	279281	450032
28S ribosomal protein S7, mitochondrial OS=Homo sapiens OX=9606 GN=MRPS7 PE=1 SV=2	16	3	6	28.1	MRPS7	86616.2	76038	22088.2	314601	195500	263575
39S ribosomal protein L17, mitochondrial OS=Homo sapiens OX=9606 GN=MRPL17 PE=1 SV=1	9	2	6	20	MRPL17	159424	123300	47345.6	162014	118837	205630
39S ribosomal protein L4, mitochondrial (Fragment) OS=Homo sapiens OX=9606 GN=MRPL4 PE=1 SV=1	12	1	6	18		46615.7	7145.41	9139.85	41461.8	33421.8	12793.7
60S ribosomal protein L10 OS=Homo sapiens OX=9606 GN=RPL10 PE=1 SV=2	13	2	6	18.6		336959	262144	78032.9	721971	521526	782940
60S ribosomal protein L35 OS=Homo sapiens OX=9606 GN=RPL35 PE=1 SV=2	11	2	6	14.5	RPL35	504821	384206	22735.4	1.1338e+06	636661	911009
6-phosphofructo-2-kinase OS=Homo sapiens OX=9606 GN=PFKFB3 PE=1 SV=1	4	2	6	64.3	PFKFB3	251306	97340.7	55541.9	70613	58743.1	44832.4
Activator of 90 kDa heat shock protein ATPase homolog 1 (Fragment) OS=Homo sapiens OX=9606 GN=AHSA1 PE=1 SV=1	15	2	6	15		228384	98976.5	37890.2	136987	149397	142963
Acyl-CoA dehydrogenase family member 10 OS=Homo sapiens OX=9606 GN=ACAD10 PE=1 SV=1	1	1	6	118.8	ACAD10	16540.2	8433.65		28712.9	17652.2	23923.3
Acyl-coenzyme A thioesterase 8 OS=Homo sapiens OX=9606 GN=ACOT8 PE=1 SV=1	8	2	6	35.9	ACOT8	27654.8	28046	4023.39	37272.6	67713.1	47497.7
Alpha-adducin OS=Homo sapiens OX=9606 GN=ADD1 PE=1 SV=1	7	3	6	73.4		221461	39112.6	27962.2	89508.1	69751.3	61737.1
Alpha-centractin OS=Homo sapiens OX=9606 GN=ACTR1A PE=1 SV=1	11	3	6	42.6	ACTR1A	57206.2	4758.28		5337.54	17019.5	38979.3
Angiomotin-like protein 2 OS=Homo sapiens OX=9606 GN=AMOTL2 PE=1 SV=3	3	1	6	85.7	AMOTL2	17725.5	18152.2	15147.4	26760.6	26326.6	23049.3
Ankyrin repeat domain-containing protein 9 OS=Homo sapiens OX=9606 GN=ANKRD9 PE=2 SV=1	6	1	6	34.3	ANKRD9	18104.8	12304.5	12768.5	27669.8	21200.6	14007
AP-1 complex subunit gamma-like 2 OS=Homo sapiens OX=9606 GN=AP1G2 PE=1 SV=1	2	1	6	87.1	AP1G2	95611.2	75010	50403.8	61961.2	51290.9	60258
Asparagine synthetase [glutamine-hydrolyzing] OS=Homo sapiens OX=9606 GN=ASNS PE=1 SV=4	10	5	6	64.3	ASNS	514589	16637.4	5281.33	12989.8	12724	56869.8
AT-hook DNA-binding motif-containing protein 1 OS=Homo sapiens OX=9606 GN=AHDC1 PE=1 SV=1	3	3	6	168.2	AHDC1	19537.9	22986.9	13508.8	66820.9	65824.6	56983.3
ATPase family protein 2 homolog OS=Homo sapiens OX=9606 GN=SPATA5 PE=4 SV=1	3	2	6	100.3		21825.7	23297.2		11470.4	11805.6
ATPase WRNIP1 OS=Homo sapiens OX=9606 GN=WRNIP1 PE=1 SV=2	3	2	6	72.1	WRNIP1	220764	58395.6	35892.7	114498	94301.1	88589.8
ATP-binding cassette sub-family D member 1 OS=Homo sapiens OX=9606 GN=ABCD1 PE=1 SV=2	5	2	6	82.9	ABCD1	17834.1	15479	18721.8	45455.7	43653.8	24931.5
ATP-dependent RNA helicase DDX39A OS=Homo sapiens OX=9606 GN=DDX39A PE=1 SV=2	6	2	6	49.1	DDX39A	411159	68066.5	20778.4	67226.8	146125	138686
BRCA1-A complex subunit BRE (Fragment) OS=Homo sapiens OX=9606 GN=BABAM2 PE=1 SV=1	17	4	6	32		142566	103777	34542	138559	127273	323590
Calcium homeostasis endoplasmic reticulum protein OS=Homo sapiens OX=9606 GN=CHERP PE=1 SV=3	6	5	6	103.6	CHERP	353624	274161	36764.3	389833	200915	257588
Calcium/calmodulin-dependent protein kinase type II subunit delta OS=Homo sapiens OX=9606 GN=CAMK2D PE=1 SV=3	8	3	6	56.3	CAMK2D	51517.2	42937.1	14733.5	79296.4	47274.4	88022.5
Calmodulin-regulated spectrin-associated protein 3 OS=Homo sapiens OX=9606 GN=CAMSAP3 PE=1 SV=2	4	3	6	134.7	CAMSAP3	86764.4	116313	51619.4	45310.4	35037.9	59425.4
Casein kinase I isoform alpha OS=Homo sapiens OX=9606 GN=CSNK1A1 PE=1 SV=2	14	4	6	42.4		359673	360781	128418	736683	382182	661051
CCR4-NOT transcription complex subunit 3 (Fragment) OS=Homo sapiens OX=9606 GN=CNOT3 PE=1 SV=1	10	2	6	31.3		117100	69964.5	27819.8	101217	68280.7	60401.6
CD2 antigen cytoplasmic tail-binding protein 2 OS=Homo sapiens OX=9606 GN=CD2BP2 PE=1 SV=1	10	3	6	37.6	CD2BP2	172270	136772	67155.4	236903	230089	167578
CDKN2AIP N-terminal-like protein OS=Homo sapiens OX=9606 GN=CDKN2AIPNL PE=1 SV=1	24	2	6	13.2	CDKN2AIPNL	315272	254673	114895	219248	480396	337245
Coiled-coil domain-containing protein 80 OS=Homo sapiens OX=9606 GN=CCDC80 PE=1 SV=1	3	2	6	108.1	CCDC80	11191.7	63404	38081.3	127798	96092.9	79909
Connector enhancer of kinase suppressor of ras 3 OS=Homo sapiens OX=9606 GN=CNKSR3 PE=1 SV=1	5	2	6	61.9	CNKSR3	29067.3	68225.3	4321.77	45778.4	24648	73945.7
Cyclin-G-associated kinase OS=Homo sapiens OX=9606 GN=GAK PE=1 SV=2	3	3	6	143.1	GAK	92982.3	94202.4	44906.8	112521	88653.1	108821
Cytochrome c oxidase subunit 4 isoform 1, mitochondrial OS=Homo sapiens OX=9606 GN=COX4I1 PE=1 SV=1	6	1	6	19.6	COX4I1	231108	384410	51968.9	669399	264910	320700
Cytochrome c oxidase subunit 6C OS=Homo sapiens OX=9606 GN=COX6C PE=1 SV=2	11	1	6	8.8	COX6C	365074	443933	226987	884550	530157	825279
Cytoplasmic FMR1-interacting protein 1 OS=Homo sapiens OX=9606 GN=CYFIP1 PE=1 SV=1	2	2	6	145.1	CYFIP1	46480	119500	84704.2	178109	143814	185549
Cytosolic endo-beta-N-acetylglucosaminidase OS=Homo sapiens OX=9606 GN=ENGASE PE=1 SV=1	3	2	6	83.9	ENGASE	46210.8	65709.8	26572.4	92983.8	86016.1	114151
DDRGK domain-containing protein 1 OS=Homo sapiens OX=9606 GN=DDRGK1 PE=1 SV=2	15	3	6	35.6	DDRGK1	618944	40205.9	49724.6	138946	112304	124622
Delta-1-pyrroline-5-carboxylate dehydrogenase, mitochondrial OS=Homo sapiens OX=9606 GN=ALDH4A1 PE=1 SV=3	8	3	6	61.7	ALDH4A1	255678	67767.6	32110.5	69034.8	47896.4	21705.4
Dermcidin OS=Homo sapiens OX=9606 GN=DCD PE=1 SV=2	20	2	6	11.3	DCD	60863.8	96540.6	51177.7	75445.6	72880.4	28943.6
Dihydrolipoyllysine-residue succinyltransferase component of 2-oxoglutarate dehydrogenase complex, mitochondrial OS=Homo sapiens OX=9606 GN=DLST PE=1 SV=4	2	1	6	48.7	DLST	91836.1	143852	27014.6	131751	94990.7	132824
DNA mismatch repair protein Mlh1 (Fragment) OS=Homo sapiens OX=9606 GN=MLH1 PE=1 SV=1	4	3	6	76.7		263810	273209	90111.3	300848	345131	231440
DNA replication licensing factor MCM6 OS=Homo sapiens OX=9606 GN=MCM6 PE=1 SV=1	8	5	6	92.8	MCM6	670651	99223.4	59521.5	154416	140783	64079.4
DnaJ homolog subfamily C member 16 OS=Homo sapiens OX=9606 GN=DNAJC16 PE=1 SV=1	6	3	6	69.3	DNAJC16	182544	169802	59879.7	258704	191829	163141
Drebrin OS=Homo sapiens OX=9606 GN=DBN1 PE=1 SV=4	7	3	6	71.4	DBN1	604775			60372.7	77292.7	39509.4
Dynamin-like 120 kDa protein, mitochondrial OS=Homo sapiens OX=9606 GN=OPA1 PE=1 SV=3	7	6	6	111.6	OPA1	221835	66527.2	75897.2	377956	240307	193191
E3 ubiquitin-protein ligase RLIM OS=Homo sapiens OX=9606 GN=RLIM PE=1 SV=3	5	3	6	68.5	RLIM	109242	91671.8	37679.9	487739	285809	587189
E3 ubiquitin-protein ligase RNF115 OS=Homo sapiens OX=9606 GN=RNF115 PE=1 SV=2	6	1	6	33.7	RNF115; LOC101060478	55813.3	13519.7	11813.8	18060	16767.5	9286.12
E3 ubiquitin-protein ligase RNF216 OS=Homo sapiens OX=9606 GN=RNF216 PE=1 SV=3	4	2	6	99.3	RNF216	44516.2	16543.3	14694.6	71923	57422.2	62057
E3 ubiquitin-protein ligase UBR2 OS=Homo sapiens OX=9606 GN=UBR2 PE=1 SV=1	3	5	6	200.4	UBR2	356690	299886	64142.6	234812	193803	261050
E3 UFM1-protein ligase 1 OS=Homo sapiens OX=9606 GN=UFL1 PE=1 SV=2	5	3	6	89.5	UFL1	106197	74548	16522.3	70898.5	67543.1	167914
Electron transfer flavoprotein subunit beta OS=Homo sapiens OX=9606 GN=ETFB PE=1 SV=3	9	2	6	27.8	ETFB	295684	42598.4	53116.9	132293	121467	79632.3
Elongator complex protein 3 OS=Homo sapiens OX=9606 GN=ELP3 PE=1 SV=2	6	3	6	62.2	ELP3	288865	278075	56332.7	211267	173793	309150
Endophilin-A2 OS=Homo sapiens OX=9606 GN=SH3GL1 PE=1 SV=1	7	2	6	41.5	SH3GL1	62512.9	40880.4	20103.6	97208.9	63260.7	55510.4
Epsin-1 OS=Homo sapiens OX=9606 GN=EPN1 PE=1 SV=2	8	2	6	60.3	EPN1	26509.3	4765.31	2968.55	20423.9	24790.7	21345.1
ER membrane protein complex subunit 1 OS=Homo sapiens OX=9606 GN=EMC1 PE=1 SV=1	3	3	6	111.7	EMC1	128394	74214.4	24597.1	110220	95436.3	95828.6
Eukaryotic translation initiation factor 4E transporter OS=Homo sapiens OX=9606 GN=EIF4ENIF1 PE=1 SV=1	5	3	6	105.5	EIF4ENIF1	78556.2	72928.3	50134.8	145624	150744	189564
Exocyst complex component 5 OS=Homo sapiens OX=9606 GN=EXOC5 PE=1 SV=1	4	2	6	74.3	EXOC5	66355.6	40555.7	24676.7	71927.4	47117.1	45532.7
Exportin-1 OS=Homo sapiens OX=9606 GN=XPO1 PE=1 SV=1	2	2	6	123.3	XPO1	374022	46487.1	19853.2	129620	95356.2	41132.1
FAS-associated factor 2 OS=Homo sapiens OX=9606 GN=FAF2 PE=1 SV=2	8	3	6	52.6	FAF2	384721	229773	113634	528419	387597	262800
FAST kinase domain-containing protein 2, mitochondrial OS=Homo sapiens OX=9606 GN=FASTKD2 PE=1 SV=1	4	2	6	81.4	FASTKD2	89211.9	85863.5	10370.8	73655.4	57176.6	62708.7
Gamma-tubulin complex component 6 OS=Homo sapiens OX=9606 GN=TUBGCP6 PE=1 SV=1	3	3	6	163.8		45044.6	40815.1	41354.5	70468.6	61235.7	34261.2
General transcription factor IIF subunit 1 OS=Homo sapiens OX=9606 GN=GTF2F1 PE=1 SV=2	9	3	6	58.2	GTF2F1	210438			9694.06	13073.8	13239.6
Glutathione peroxidase OS=Homo sapiens OX=9606 GN=GPX8 PE=1 SV=1	14	2	6	18.1	GPX8	1.86854e+06	2.15515e+06	848661	3.46917e+06	2.97902e+06	3.49455e+06
Glycylpeptide N-tetradecanoyltransferase 1 (Fragment) OS=Homo sapiens OX=9606 GN=NMT1 PE=1 SV=1	35	2	6	8.2		173928	90592.3	20260.4	125838	141294	217433
G-patch domain and KOW motifs-containing protein OS=Homo sapiens OX=9606 GN=GPKOW PE=1 SV=2	9	2	6	52.2	GPKOW	54766.8	10985.9		27884.6	37503.5	48706.2
G-protein-signaling modulator 1 OS=Homo sapiens OX=9606 GN=GPSM1 PE=1 SV=1	4	2	6	74.4	GPSM1	78680.2	54055.3	34055.3	114875	86039.1	118107
Growth arrest-specific protein 6 OS=Homo sapiens OX=9606 GN=GAS6 PE=1 SV=3	4	2	6	74.9		417497	44455.4	28051.1	86527.8	71822.1	50940
GTPase KRas OS=Homo sapiens OX=9606 GN=KRAS PE=1 SV=1	6	1	6	21.6	KRAS	232700	179520	75751.7	263787	177536	210254
Guanine nucleotide-binding protein G(I)/G(S)/G(T) subunit beta-2 (Fragment) OS=Homo sapiens OX=9606 GN=GNB2 PE=1 SV=1	12	2	6	27.5		18869.6	14246.6	3588.81	16969	15381.6	16056.2
Heterogeneous nuclear ribonucleoprotein A3 OS=Homo sapiens OX=9606 GN=HNRNPA3 PE=1 SV=2	8	2	6	39.6	HNRNPA3	164929	17375.2		40362	69467	72032.1
Histone-binding protein RBBP4 OS=Homo sapiens OX=9606 GN=RBBP4 PE=1 SV=3	7	2	6	47.6	RBBP4	781566	58844.8	23004	128362	180185	84525.5
Importin subunit alpha-7 OS=Homo sapiens OX=9606 GN=KPNA6 PE=1 SV=1	6	2	6	60	KPNA6	88361.9	32470.9	8483.15	56797.2	37801.1	21202.7
Inorganic pyrophosphatase OS=Homo sapiens OX=9606 GN=PPA1 PE=1 SV=2	21	6	6	32.6	PPA1	4.208e+06	10742.8		10749.7	12363	32293.6
Insulin-like growth factor 2 mRNA-binding protein 1 OS=Homo sapiens OX=9606 GN=IGF2BP1 PE=1 SV=2	13	6	6	63.4	IGF2BP1	865050
Integrin alpha-6 OS=Homo sapiens OX=9606 GN=ITGA6 PE=1 SV=5	6	5	6	126.5	ITGA6	47299.8	41012.8	15596	119833	86964.3	104065
Isobutyryl-CoA dehydrogenase, mitochondrial OS=Homo sapiens OX=9606 GN=ACAD8 PE=1 SV=1	9	3	6	45	ACAD8	90925.2	79258.7	18705	120648	110332	138010
Kelch-like protein 21 OS=Homo sapiens OX=9606 GN=KLHL21 PE=1 SV=4	4	2	6	66.6	KLHL21	61433.8	44729.2	27985.2	137933	112488	135673
Lamin-B2 OS=Homo sapiens OX=9606 GN=LMNB2 PE=1 SV=4	8	4	6	69.9	LMNB2	218895	174890	106289	170729	192114	87911
Leucine-rich repeat-containing protein 47 OS=Homo sapiens OX=9606 GN=LRRC47 PE=1 SV=1	5	2	6	63.4	LRRC47	357382	91967.7	21725.5	126677	117959	195902
Leukocyte receptor cluster member 9 OS=Homo sapiens OX=9606 GN=LENG9 PE=2 SV=2	3	2	6	53.1	LENG9	66298.7	62355.9	32640.6	83787.4	64865.9	78916.7
Long-chain-fatty-acid--CoA ligase 1 OS=Homo sapiens OX=9606 GN=ACSL1 PE=1 SV=1	8	4	6	58.5	ACSL1	151860	132850	30132.4	321042	149953	190952
Lysophosphatidylserine lipase ABHD12 OS=Homo sapiens OX=9606 GN=ABHD12 PE=1 SV=2	3	1	6	45.1	ABHD12	85244.9	82406	62349.6	147657	75278.2	95680
MAGUK p55 subfamily member 2 OS=Homo sapiens OX=9606 GN=MPP2 PE=1 SV=1	4	2	6	64		180879	130595	103136	104906	82924.1	119975
MAP kinase-activated protein kinase 3 (Fragment) OS=Homo sapiens OX=9606 GN=MAPKAPK3 PE=1 SV=1	15	3	6	37.4		204586	167081	41091.2	312217	315099	475275
Matrilin-2 OS=Homo sapiens OX=9606 GN=MATN2 PE=1 SV=4	2	2	6	106.8	MATN2	71323.4	75036.4	15260.8	116480	76029.4	102745
Membrane-associated progesterone receptor component 2 OS=Homo sapiens OX=9606 GN=PGRMC2 PE=1 SV=1	9	1	6	23.8	PGRMC2	198217	104977	95328.8	338630	236800	178098
Metalloreductase STEAP3 OS=Homo sapiens OX=9606 GN=STEAP3 PE=1 SV=2	2	1	6	54.6	STEAP3	94812.6	75625.7	25112.9	77946.3	66753.7	140102
Methenyltetrahydrofolate cyclohydrolase OS=Homo sapiens OX=9606 GN=MTHFD2 PE=1 SV=1	10	2	6	23.9		72793.7	35717.3	27031	123436	140755	82790.9
MICOS complex subunit OS=Homo sapiens OX=9606 GN=APOOL PE=1 SV=1	10	2	6	28.7		88880.4	42812	33362.6	251329	148749	113775
Mitochondrial import inner membrane translocase subunit TIM14 OS=Homo sapiens OX=9606 GN=DNAJC19 PE=1 SV=3	12	1	6	12.5	DNAJC19	112408	115787	25623.1	181785	116631	116864
Mitochondrial import inner membrane translocase subunit TIM50 OS=Homo sapiens OX=9606 GN=TIMM50 PE=1 SV=2	11	4	6	39.6	TIMM50	312692	91039.3	57578.2	270671	204181	93767.9
Mitochondrial thiamine pyrophosphate carrier OS=Homo sapiens OX=9606 GN=SLC25A19 PE=1 SV=1	6	2	6	35.5	SLC25A19	103338	115218	36323.8	218060	213057	336836
Mitogen-activated protein kinase kinase kinase 11 OS=Homo sapiens OX=9606 GN=MAP3K11 PE=1 SV=1	4	3	6	92.6	MAP3K11	91562.5	68422.8	39761.6	97698.5	97805.4	104492
Myb-binding protein 1A OS=Homo sapiens OX=9606 GN=MYBBP1A PE=1 SV=2	3	4	6	148.8	MYBBP1A	219781	261868	136248	439036	300634	314204
N-acetyltransferase 14 (Fragment) OS=Homo sapiens OX=9606 GN=NAT14 PE=1 SV=1	13	1	6	17.8		25573.6	9343.59	10538.5	31427.9	22952.2	14134.5
N-acylneuraminate cytidylyltransferase OS=Homo sapiens OX=9606 GN=CMAS PE=1 SV=2	9	3	6	48.3	CMAS	337442	50129.6	41916.2	194245	104959	71492.3
NADH dehydrogenase [ubiquinone] flavoprotein 1, mitochondrial OS=Homo sapiens OX=9606 GN=NDUFV1 PE=1 SV=1	7	3	6	50	NDUFV1	50901.2	57215.7	22410.1	100756	76871.9	54653.1
Negative elongation factor A OS=Homo sapiens OX=9606 GN=NELFA PE=1 SV=1	8	3	6	58.5	NELFA; WHSC2	140204	90889	27312.3	100903	98912.2	110495
Neuron navigator 2 OS=Homo sapiens OX=9606 GN=NAV2 PE=1 SV=3	2	3	6	268	NAV2	53946.3	65836.6	39953.3	116003	113979	95864.7
NF-kappa-B essential modulator OS=Homo sapiens OX=9606 GN=IKBKG PE=1 SV=2	13	3	6	48.2	IKBKG	516641	22825.7		34653.4	14626.3	23279.9
Nuclear migration protein nudC OS=Homo sapiens OX=9606 GN=NUDC PE=1 SV=1	11	3	6	38.2	NUDC	1.04457e+06	141569	38635.1	152352	83465.8	39573.7
Nuclear receptor coactivator 3 OS=Homo sapiens OX=9606 GN=NCOA3 PE=1 SV=1	5	5	6	155.2	NCOA3	114979	82130.6	31643.5	114658	91276.3	84577.3
Nucleolar protein 58 OS=Homo sapiens OX=9606 GN=NOP58 PE=1 SV=1	2	1	6	59.5	NOP58	191897	19956	6152.37	55460.3	52926.2	45471.4
Nucleoprotein TPR OS=Homo sapiens OX=9606 GN=TPR PE=1 SV=3	3	6	6	267.1	TPR	600234	219622	28607.2	201528	131165	66749.5
Nucleosome assembly protein 1-like 4 (Fragment) OS=Homo sapiens OX=9606 GN=NAP1L4 PE=1 SV=1	33	3	6	16		203990	39033.8	27957.2	108716	90337.8	67615.4
Parafibromin OS=Homo sapiens OX=9606 GN=CDC73 PE=1 SV=1	10	3	6	43.8		331364	159117	107902	164113	113473	139935
Peroxisomal membrane protein 11B OS=Homo sapiens OX=9606 GN=PEX11B PE=1 SV=1	20	3	6	28.4	LOC101060567; PEX11B	118015	111731	48216.2	219261	156508	134918
Peroxisome assembly factor 2 OS=Homo sapiens OX=9606 GN=PEX6 PE=1 SV=2	4	3	6	104	PEX6	84728.6	59729	34135.2	143282	135995	107827
Phosphatidylinositol 4-phosphate 5-kinase type-1 alpha OS=Homo sapiens OX=9606 GN=PIP5K1A PE=1 SV=2	7	3	6	61.2	PIP5K1A			8821.92	20052.2	43161	70582
pre-rRNA 2'-O-ribose RNA methyltransferase FTSJ3 OS=Homo sapiens OX=9606 GN=FTSJ3 PE=1 SV=2	5	4	6	96.5	FTSJ3	128134	44964.3	25571.2	164995	171639	214850
Probable arginine--tRNA ligase, mitochondrial OS=Homo sapiens OX=9606 GN=RARS2 PE=1 SV=1	3	2	6	65.5	RARS2	50434.4	42346.2	41376.2	176680	154923	185291
Profilin OS=Homo sapiens OX=9606 GN=PFN2 PE=1 SV=1	15	1	6	9.8		122487	111902	81044.7	237039	160354	118515
Proteasome subunit beta type-1 OS=Homo sapiens OX=9606 GN=PSMB1 PE=1 SV=2	14	2	6	26.5	PSMB1	143815	37865	7614.3	35658.9	38964.1	73001.6
Protein DEK OS=Homo sapiens OX=9606 GN=DEK PE=1 SV=2	7	2	6	32.7		304836	118344	46740.7	301537	172781	176008
Protein O-mannosyl-transferase TMTC3 OS=Homo sapiens OX=9606 GN=TMTC3 PE=1 SV=2	1	1	6	103.9	TMTC3	87736.3	86705.3	52240.4	125052	82395.8	72334.2
Protein Red OS=Homo sapiens OX=9606 GN=IK PE=1 SV=3	3	2	6	65.6	IK	270209	370057	97910.9	462085	349124	696148
Protein S100-A6 OS=Homo sapiens OX=9606 GN=S100A6 PE=1 SV=1	9	1	6	10.2	S100A6	1.38096e+06	867301	875134	2.66279e+06	3.25189e+06	2.51625e+06
Protein YIF1B OS=Homo sapiens OX=9606 GN=YIF1B PE=1 SV=1	12	2	6	26.9		92451	79587.9	24508.1	105088	74716.3	85605.1
Rab GDP dissociation inhibitor beta OS=Homo sapiens OX=9606 GN=GDI2 PE=1 SV=2	5	2	6	50.6	GDI2	693681	70316.8	7291.41	87164.3	96908.6	222490
Rap1 GTPase-GDP dissociation stimulator 1 OS=Homo sapiens OX=9606 GN=RAP1GDS1 PE=1 SV=3	3	2	6	66.3	RAP1GDS1	64855.3	41174.4	33715.1	49915.9	59565.4	100940
Ras and Rab interactor 1 OS=Homo sapiens OX=9606 GN=RIN1 PE=1 SV=4	3	2	6	84	RIN1	111661	87744.4	59114.6	202556	174675	172604
Regulation of nuclear pre-mRNA domain-containing protein 2 OS=Homo sapiens OX=9606 GN=RPRD2 PE=1 SV=1	2	2	6	155.9	RPRD2	109151	102177	27808.5	130900	98932.5	137828
Regulator of microtubule dynamics protein 3 OS=Homo sapiens OX=9606 GN=RMDN3 PE=1 SV=2	4	1	6	52.1	FAM82A2; RMDN3	62662.2	21293.3	9751.14	46304.2	36453.6	56276.8
Rho guanine nucleotide exchange factor 7 OS=Homo sapiens OX=9606 GN=ARHGEF7 PE=1 SV=1	5	3	6	79.8	ARHGEF7	234665	221871	122261	264367	169872	151907
Rhophilin-2 OS=Homo sapiens OX=9606 GN=RHPN2 PE=1 SV=1	6	4	6	76.9	RHPN2	273342	188645	13489.9	76665.5	59544.1	215430
RNA cytosine C(5)-methyltransferase NSUN2 OS=Homo sapiens OX=9606 GN=NSUN2 PE=1 SV=2	4	3	6	86.4	NSUN2	334202	49751.6	52817.1	212153	165597	102805
RNA-binding motif, single-stranded-interacting protein 2 OS=Homo sapiens OX=9606 GN=RBMS2 PE=1 SV=1	14	4	6	43.9	RBMS2	25232.6	77627.7	57054.6	196873	144132	112411
RNA-binding protein MEX3D OS=Homo sapiens OX=9606 GN=MEX3D PE=1 SV=3	5	2	6	64.8	MEX3D	21623.4	7795.64		10863.5	11351.7	10485.5
RNA-binding protein with multiple-splicing (Fragment) OS=Homo sapiens OX=9606 GN=RBPMS PE=1 SV=1	26	2	6	13.1		74536	97911.5		97078.4	77181.2	116774
S-adenosylhomocysteine hydrolase-like protein 1 OS=Homo sapiens OX=9606 GN=AHCYL1 PE=1 SV=2	7	3	6	58.9	AHCYL1	131919	58060.1	29350.5	132338	101019	179569
S-adenosylmethionine synthase isoform type-2 OS=Homo sapiens OX=9606 GN=MAT2A PE=1 SV=1	7	2	6	43.6	MAT2A	324953	82607.8	32100.4	110554	125954	169977
Serine/threonine-protein kinase MRCK beta OS=Homo sapiens OX=9606 GN=CDC42BPB PE=1 SV=2	2	3	6	194.2	CDC42BPB	194938	266978	120966	317082	251134	363969
Serine/threonine-protein kinase VRK2 OS=Homo sapiens OX=9606 GN=VRK2 PE=1 SV=3	4	2	6	58.1	VRK2	81509.9	43661.6	16230.9	63780.5	72657.8	86380.8
Serine/threonine-protein phosphatase 2B catalytic subunit alpha isoform OS=Homo sapiens OX=9606 GN=PPP3CA PE=1 SV=1	3	1	6	58.7	PPP3CA	50670.9	29063.1	10591.9	43147.8	34478.7	51597.4
Serine/threonine-protein phosphatase CPPED1 OS=Homo sapiens OX=9606 GN=CPPED1 PE=1 SV=3	7	2	6	35.5	CPPED1	139060	31056.5	16505.8	67209.8	40702.7	47989.6
Short-chain dehydrogenase/reductase 3 OS=Homo sapiens OX=9606 GN=DHRS3 PE=1 SV=2	7	2	6	33.5	DHRS3	57423.1	173167	48481.3	379030	193121	183696
Sideroflexin-4 OS=Homo sapiens OX=9606 GN=SFXN4 PE=1 SV=1	9	2	6	38	SFXN4	38256.8	27194.4	12335.2	54478.5	37854.4	44657.7
Signal transducer and activator of transcription 2 OS=Homo sapiens OX=9606 GN=STAT2 PE=1 SV=1	3	2	6	97.9	STAT2	163856	52970.3	46066.7	113296	128086	126736
Signal transducer and activator of transcription 3 OS=Homo sapiens OX=9606 GN=STAT3 PE=1 SV=2	4	3	6	88	STAT3	824350	16705.4	11214.3	43705.6	29492.2	22090.6
Signal-induced proliferation-associated 1-like protein 3 OS=Homo sapiens OX=9606 GN=SIPA1L3 PE=1 SV=3	2	3	6	194.5	SIPA1L3	45798.8	48702.9	6568.23	35902.4	28626.4	29972
Small nuclear ribonucleoprotein Sm D3 OS=Homo sapiens OX=9606 GN=SNRPD3 PE=1 SV=1	8	1	6	13.9	SNRPD3	617857	349999	64708.9	409405	453541	602775
Sortilin OS=Homo sapiens OX=9606 GN=SORT1 PE=1 SV=3	5	3	6	92	SORT1	233177	44260.2	48122.6	88352.5	84285.9	80089.2
Spermatogenesis-associated serine-rich protein 2 OS=Homo sapiens OX=9606 GN=SPATS2 PE=1 SV=1	10	3	6	59.5	SPATS2		17826.7	15337.2	120379	95652.6	45049.8
Spindle and kinetochore-associated protein 3 OS=Homo sapiens OX=9606 GN=SKA3 PE=1 SV=2	13	4	6	46.3	SKA3	254080	13672.6	13444.4	19693.6	22190.1	43158.1
Splicing factor U2AF 35 kDa subunit OS=Homo sapiens OX=9606 GN=U2AF1 PE=1 SV=3	9	2	6	27.9	U2AF1; LOC102724594; U2AF1L5	458628	305163	188233	1.03215e+06	684558	565577
Splicing factor U2AF 65 kDa subunit OS=Homo sapiens OX=9606 GN=U2AF2 PE=1 SV=4	8	1	6	53.5	U2AF2	68258.5			57476.9	49117.6
Stress-induced-phosphoprotein 1 OS=Homo sapiens OX=9606 GN=STIP1 PE=1 SV=1	8	5	6	62.6	STIP1	810702	43414.7	9688.54	68337	73897.8	44772.7
Succinate dehydrogenase [ubiquinone] flavoprotein subunit, mitochondrial OS=Homo sapiens OX=9606 GN=SDHA PE=1 SV=2	7	4	6	72.6	SDHA	198057	102253	85403.1	209115	153955	183262
Synaptopodin OS=Homo sapiens OX=9606 GN=SYNPO PE=1 SV=2	4	2	6	99.4	SYNPO	38152.6	14894.7	14733.1	63295.9	57862.7	54100.9
Taperin OS=Homo sapiens OX=9606 GN=TPRN PE=1 SV=2	6	3	6	75.5	TPRN	17230.9	36535.7	15333.4	113223	95353.3	82893.2
Telomerase RNA component interacting RNase OS=Homo sapiens OX=9606 GN=TRIR PE=1 SV=1	15	2	6	18.4	C19orf43; TRIR	110606	98781.6	45479.1	132242	91685.3	81494.4
Tensin-1 OS=Homo sapiens OX=9606 GN=TNS1 PE=1 SV=1	4	3	6	143.4					53393.1	36324.4	41483.2
Tetratricopeptide repeat protein 37 OS=Homo sapiens OX=9606 GN=TTC37 PE=1 SV=1	2	3	6	175.4	TTC37	117723	62074.1	5393.58	80494.8	147539	203162
Thioredoxin OS=Homo sapiens OX=9606 GN=TXN PE=1 SV=3	21	2	6	11.7	TXN	4.43952e+06	317630	72168.1	450482	277922	169272
THO complex subunit 4 OS=Homo sapiens OX=9606 GN=ALYREF PE=1 SV=3	17	3	6	26.9	ALYREF	224753	53203.5		147879	188455	302113
Threonine--tRNA ligase 1, cytoplasmic OS=Homo sapiens OX=9606 GN=TARS1 PE=1 SV=3	4	3	6	83.4	TARS	278831	35426.7	17028.7	62085.6	48382.9	70037.7
Trafficking protein particle complex subunit 5 OS=Homo sapiens OX=9606 GN=TRAPPC5 PE=1 SV=1	16	3	6	20.8	TRAPPC5	245821	165360	40516.4	130183	16146.4	307978
Transcription elongation factor SPT6 OS=Homo sapiens OX=9606 GN=SUPT6H PE=1 SV=2	2	3	6	198.9	SUPT6H	702690
Transcriptional repressor p66-beta OS=Homo sapiens OX=9606 GN=GATAD2B PE=1 SV=1	13	4	6	65.2	GATAD2B	80060	45200.4	13257.3	98578.4	78095	94316.7
Transforming acidic coiled-coil-containing protein 1 OS=Homo sapiens OX=9606 GN=TACC1 PE=1 SV=1	8	3	6	62.4		289029	16303.6	21155.1	69170	44760.8	26691.9
Transmembrane glycoprotein NMB OS=Homo sapiens OX=9606 GN=GPNMB PE=1 SV=1	5	2	6	65.9		1.15829e+06	1.8798e+06	481407	8.91094e+06	6.1405e+06	7.52152e+06
Trichoplein keratin filament-binding protein OS=Homo sapiens OX=9606 GN=TCHP PE=1 SV=1	4	2	6	61	TCHP	121117	95677.2	73052.1	165971	188695	125906
Tripeptidyl-peptidase 1 OS=Homo sapiens OX=9606 GN=TPP1 PE=1 SV=1	26	3	6	17.5		594074	558564	469265	1.37026e+06	956217	1.03197e+06
Tripeptidyl-peptidase 2 (Fragment) OS=Homo sapiens OX=9606 GN=TPP2 PE=1 SV=1	5	4	6	130.3		102642	83997.7	46628	120997	86348.6	101832
Tuberin (Fragment) OS=Homo sapiens OX=9606 GN=TSC2 PE=1 SV=1	3	3	6	197.7		11906.8	6189.68		9276.94	10886	16859.9
U2 small nuclear ribonucleoprotein A' (Fragment) OS=Homo sapiens OX=9606 GN=SNRPA1 PE=1 SV=1	55	4	6	9.5		1.81231e+06	1.56388e+06	898859	1.60074e+06	1.30365e+06	1.14282e+06
Ubiquitin carboxyl-terminal hydrolase 14 OS=Homo sapiens OX=9606 GN=USP14 PE=1 SV=3	6	2	6	56	USP14	277241	48201.5	22579	158421	161369	278061
UBX domain-containing protein 1 OS=Homo sapiens OX=9606 GN=UBXN1 PE=1 SV=2	20	4	6	33.3	UBXN1	593229	435057	109398	515797	481265	587157
Unconventional myosin-6 OS=Homo sapiens OX=9606 GN=MYO6 PE=1 SV=1	1	1	6	144.9	MYO6	19264.4	6960.62	7182.38		19404.5	16741.6
Up-regulator of cell proliferation OS=Homo sapiens OX=9606 GN=URGCP PE=1 SV=2	2	2	6	104.9	URGCP	78399.8	103219	15327.7	81315.2	102459	206697
Vacuolar protein sorting-associated protein 29 OS=Homo sapiens OX=9606 GN=VPS29 PE=1 SV=1	8	2	6	24	VPS29	329003	285278	60990.1	282700	244626	410278
Vacuolar protein sorting-associated protein 53 homolog OS=Homo sapiens OX=9606 GN=VPS53 PE=1 SV=2	5	3	6	94.3		145878	144003	33884	142635	131046	154221
Very-long-chain enoyl-CoA reductase OS=Homo sapiens OX=9606 GN=TECR PE=1 SV=1	5	2	6	39.9		216964	272890	17737.1	234521	131018	203128
WD repeat-containing protein 62 OS=Homo sapiens OX=9606 GN=WDR62 PE=1 SV=4	3	3	6	165.8	WDR62	152119	7462.68	12342.3	23564.8	20662.6	23336.7
Zinc finger protein 574 OS=Homo sapiens OX=9606 GN=ZNF574 PE=1 SV=2	5	2	6	98.8	ZNF574	27099			16526.3	14661.1	12770.4
Zinc finger SWIM domain-containing protein 8 OS=Homo sapiens OX=9606 GN=ZSWIM8 PE=1 SV=1	2	3	6	196.8	ZSWIM8	75734.4	98899.6	32231.4	207093	157455	177783
Zinc transporter 9 OS=Homo sapiens OX=9606 GN=SLC30A9 PE=1 SV=1	4	2	6	63.5	SLC30A9	124012	76868.2	35597	123847	103409	106261
28S ribosomal protein S23, mitochondrial OS=Homo sapiens OX=9606 GN=MRPS23 PE=1 SV=1	20	3	5	17.5		117108	106232	17286.6	164819	253908	451854
2-hydroxyacyl-CoA lyase 2 OS=Homo sapiens OX=9606 GN=ILVBL PE=1 SV=1	8	2	5	56.7	ILVBL	191236	123117	64353.3	158317	178018	239281
3-ketoacyl-CoA thiolase, peroxisomal (Fragment) OS=Homo sapiens OX=9606 GN=ACAA1 PE=1 SV=1	22	3	5	30.3		136133		17095.1	50585.9	43782.4	21286.3
60S ribosomal protein L21 OS=Homo sapiens OX=9606 GN=RPL21 PE=1 SV=1	17	1	5	9.9	RPL21	383132	87920.3		265834	309557	850994
6-phosphogluconate dehydrogenase, decarboxylating (Fragment) OS=Homo sapiens OX=9606 GN=PGD PE=1 SV=1	31	4	5	17.3		1.42512e+06		7425.45	23882	11305.2	6702.45
Adenylosuccinate lyase (Fragment) OS=Homo sapiens OX=9606 GN=ADSL PE=1 SV=1	15	4	5	42.5		266455	20497	14138.5	35379.8	28212.2	14146.8
Adenylyl cyclase-associated protein OS=Homo sapiens OX=9606 GN=CAP2 PE=1 SV=1	6	2	5	39.9	CAP2	20254.2	6576.57	3894.18	21133.4	20178.4	25376.3
All-trans-retinol 13,14-reductase OS=Homo sapiens OX=9606 GN=RETSAT PE=1 SV=2	5	2	5	66.8	RETSAT	73996.1	32244.6	27198	68424	44497.2	35177.7
Alpha/beta hydrolase domain-containing protein 16A OS=Homo sapiens OX=9606 GN=ABHD16A PE=1 SV=1	5	3	5	67.5	ABHD16A	115310	82165.2	17675.5	124187	105063	139422
Amidophosphoribosyltransferase OS=Homo sapiens OX=9606 GN=PPAT PE=1 SV=1	8	3	5	57.4	PPAT	788458	6091.25	8660.31	14356.9	16178.5	7998.61
Apoptosis regulator BAX OS=Homo sapiens OX=9606 GN=BAX PE=1 SV=1	23	3	5	21.2	BAX	62858	15850.1	48032.1	92856.1	55650.8	26297.2
Aryl hydrocarbon receptor OS=Homo sapiens OX=9606 GN=AHR PE=1 SV=1	2	2	5	94.4		59529.4	66023.4	10242.8	50573.1	46838.1	117198
ATP synthase membrane subunit DAPIT, mitochondrial OS=Homo sapiens OX=9606 GN=ATP5MD PE=1 SV=1	28	1	5	6.5	USMG5	118953	37147.4	10693	71471.2	55718.6	45795
ATP-dependent RNA helicase DDX50 OS=Homo sapiens OX=9606 GN=DDX50 PE=1 SV=1	5	3	5	82.5	DDX50	29295.5	20769	10552.1	39139.2	29788.4	40783.8
Atrophin-1 OS=Homo sapiens OX=9606 GN=ATN1 PE=1 SV=3	1	1	5	125.3	ATN1	41966.4	29523.7	21775.5	52462	41166.4	49301.9
Bcl-2-associated transcription factor 1 OS=Homo sapiens OX=9606 GN=BCLAF1 PE=1 SV=1	4	3	5	100.3	BCLAF1	309464	116688	50105	488224	327133	376740
Beta-2-microglobulin (Fragment) OS=Homo sapiens OX=9606 GN=B2M PE=1 SV=1	14	1	5	8.5		73906.5	91106.2	36238.2	203160	210074	207139
BRCA1-associated ATM activator 1 OS=Homo sapiens OX=9606 GN=BRAT1 PE=1 SV=2	3	2	5	88.1	BRAT1	77032.5	24278.8	20851.7	31855.3	34477.4	47284.7
Bromodomain adjacent to zinc finger domain protein 1A OS=Homo sapiens OX=9606 GN=BAZ1A PE=1 SV=2	1	1	5	178.6	BAZ1A	17171080	2.11552e+07	1.07589e+07	2.47161e+07	2.63807e+07	2.70316e+07
Calcium uniporter protein (Fragment) OS=Homo sapiens OX=9606 GN=MCU PE=1 SV=1	15	2	5	19		142478	135918	40256.3	192213	131683	147586
Carnitine O-palmitoyltransferase 1, liver isoform OS=Homo sapiens OX=9606 GN=CPT1A PE=1 SV=2	5	3	5	88.3	CPT1A	200245	84989.7	69149.5	76669.9	65524.1	28682.8
Casein kinase I isoform delta OS=Homo sapiens OX=9606 GN=CSNK1D PE=1 SV=2	6	2	5	49	CSNK1D	225704	255685	79944.4	392588	287783	170567
Casein kinase I isoform epsilon (Fragment) OS=Homo sapiens OX=9606 GN=CSNK1E PE=1 SV=1	23	2	5	13		82969.8	54746	48794.8	88413.6	64324.7	51093.5
Caskin-2 OS=Homo sapiens OX=9606 GN=CASKIN2 PE=1 SV=2	1	1	5	126.7	CASKIN2	23583.1	20495.6	13612.8	50730.8	45426.8	43884
Cation-independent mannose-6-phosphate receptor OS=Homo sapiens OX=9606 GN=IGF2R PE=1 SV=3	3	5	5	274.2	IGF2R	1.20161e+06	62233.5	24902	68576.1	49434.3	64233.8
Cell cycle checkpoint protein RAD17 OS=Homo sapiens OX=9606 GN=RAD17 PE=1 SV=1	4	2	5	77		74272.5	83986.5	25348.8	133444	78129.2	68364.7
Chromodomain-helicase-DNA-binding protein 8 OS=Homo sapiens OX=9606 GN=CHD8 PE=1 SV=5	2	2	5	290.3	CHD8	19870.3	5926.62		30496.3	19132.3	24942.6
Cleavage and polyadenylation specificity factor subunit 4 OS=Homo sapiens OX=9606 GN=CPSF4 PE=1 SV=1	12	1	5	21.9	CPSF4	200465	62806.9	33107.7	145154	116462	119131
Cleavage and polyadenylation specificity factor subunit 5 OS=Homo sapiens OX=9606 GN=NUDT21 PE=1 SV=1	10	3	5	26.2	NUDT21	341428	249529	61196.2	199589	200583	303738
CLIP-associating protein 1 OS=Homo sapiens OX=9606 GN=CLASP1 PE=1 SV=1	3	4	5	169.3	CLASP1	194500	77696.6	18652.2	63008.8	67082.8	67102.4
Cold-inducible RNA-binding protein OS=Homo sapiens OX=9606 GN=CIRBP PE=1 SV=1	18	3	5	18.6	CIRBP	166100	71276.4	30018.2	227360	250360	135007
COMM domain-containing protein 9 OS=Homo sapiens OX=9606 GN=COMMD9 PE=1 SV=2	6	1	5	21.8	COMMD9	64336.6	39787.1	24365.8	52086.5	28571.4	24300.6
Condensin complex subunit 1 OS=Homo sapiens OX=9606 GN=NCAPD2 PE=1 SV=3	4	4	5	157.1	NCAPD2	123604	36059.1	13477.9	72878.2	51762	35823.1
Condensin complex subunit 3 OS=Homo sapiens OX=9606 GN=NCAPG PE=1 SV=1	2	2	5	114.3	NCAPG	167699	76896.3	33968.9	132363	123164	132992
Coronin-1B OS=Homo sapiens OX=9606 GN=CORO1B PE=1 SV=1	11	3	5	54.2	CORO1B	165188	12548.7	2954.98	18565.2	23175.2	18346.5
CTP synthase OS=Homo sapiens OX=9606 GN=CTPS1 PE=1 SV=1	5	2	5	50.4		83780.5	79750.2	22202.7	71291.4	79961.3	119928
Cyclin-dependent kinase 11A OS=Homo sapiens OX=9606 GN=CDK11A PE=1 SV=4	3	2	5	91.3	CDK11A	61529.9	52014	13890.3	263724	206061	310828
Cytoplasmic dynein 1 intermediate chain 2 (Fragment) OS=Homo sapiens OX=9606 GN=DYNC1I2 PE=1 SV=1	20	2	5	19.3		140302	14637.1	35023.5	193168	103963	17489.8
DALR anticodon-binding domain-containing protein 3 OS=Homo sapiens OX=9606 GN=DALRD3 PE=1 SV=2	4	1	5	59.3	DALRD3	22851.6	15516.1		17045.1	19701.3	30843.8
Dedicator of cytokinesis protein 6 OS=Homo sapiens OX=9606 GN=DOCK6 PE=1 SV=3	1	3	5	229.4	DOCK6	12231.8	8451.69			9061.99	14681.5
Dihydropyrimidinase-related protein 4 OS=Homo sapiens OX=9606 GN=DPYSL4 PE=1 SV=2	4	2	5	61.8	DPYSL4	123317	149126	66710	88651.7	74905.7	78109.2
Disks large homolog 5 (Fragment) OS=Homo sapiens OX=9606 GN=DLG5 PE=1 SV=1	6	4	5	96.6	DLG5	183110	80537.1	44253.1	203072	92535.5	93865.4
DNA polymerase delta subunit 2 (Fragment) OS=Homo sapiens OX=9606 GN=POLD2 PE=1 SV=1	9	1	5	16.8		67342.7	46815.2	15082.7	46324.7	44750.7	65175.1
DnaJ homolog subfamily C member 30, mitochondrial OS=Homo sapiens OX=9606 GN=DNAJC30 PE=1 SV=3	13	2	5	25.9	DNAJC30	73651.3	51039.2	45030.8	104802	92815	107767
Double-stranded RNA-binding protein Staufen homolog 2 OS=Homo sapiens OX=9606 GN=STAU2 PE=1 SV=1	8	4	5	56.3		115253	77687	51689	198957	161954	129244
Dynein light chain roadblock-type 1 OS=Homo sapiens OX=9606 GN=DYNLRB1 PE=1 SV=3	27	2	5	10.9	DYNLRB1	253120	67597.3	69846.5	173173	182416	98857.1
E3 ubiquitin protein ligase OS=Homo sapiens OX=9606 GN=RNF40 PE=1 SV=2	3	2	5	109		93857.9	31513.3	13784.3	62336	43336.8	36330.9
E3 ubiquitin-protein ligase TRIM33 OS=Homo sapiens OX=9606 GN=TRIM33 PE=1 SV=3	1	1	5	122.5	TRIM33	185173	99505.9	37146.2	99497.3	89973.5	76668.6
E3 ubiquitin-protein ligase UBR1 OS=Homo sapiens OX=9606 GN=UBR1 PE=1 SV=1	21	1	5	6.6			14113.8	8164.54	53601.6	37837.9	34453
Endophilin-B1 OS=Homo sapiens OX=9606 GN=SH3GLB1 PE=1 SV=1	6	2	5	40.8	SH3GLB1	97209.9	37708.7	33147.6	82609.6	48638.4	36261.7
Endoplasmic reticulum aminopeptidase 1 OS=Homo sapiens OX=9606 GN=ERAP1 PE=1 SV=3	1	1	5	107.2	ERAP1					57286.6	67953.6
Eukaryotic translation initiation factor 3 subunit G (Fragment) OS=Homo sapiens OX=9606 GN=EIF3G PE=1 SV=8	23	4	5	29.3		727895	129670	67901.8	224424	150409	86092.1
Eukaryotic translation initiation factor 4 gamma 3 OS=Homo sapiens OX=9606 GN=EIF4G3 PE=1 SV=1	1	1	5	195.2		38159.6	34223.2	26697.9	52612.1	41970.1	54289.5
Exocyst complex component 3 OS=Homo sapiens OX=9606 GN=EXOC3 PE=1 SV=3	2	2	5	85.5		872013	88220.7	43811.9	172415	126877	128483
Exosome complex component RRP4 OS=Homo sapiens OX=9606 GN=EXOSC2 PE=1 SV=2	5	1	5	32.8	EXOSC2	52181.6	45605.8		56698.3	35117.2	60763.1
Exosome complex exonuclease RRP44 OS=Homo sapiens OX=9606 GN=DIS3 PE=1 SV=2	3	2	5	108.9	DIS3	346680	276836	169143	407101	272863	248916
FAST kinase domain-containing protein 5, mitochondrial OS=Homo sapiens OX=9606 GN=FASTKD5 PE=1 SV=1	2	2	5	86.5	FASTKD5	61689.8	132756	83289.2	198789	159340	145626
F-box only protein 7 OS=Homo sapiens OX=9606 GN=FBXO7 PE=1 SV=1	3	1	5	58.5	FBXO7	50877.6	23050.3		26811.5	30403.5	73959.5
FERM domain-containing protein 6 OS=Homo sapiens OX=9606 GN=FRMD6 PE=1 SV=1	4	2	5	72	FRMD6	64522.8	70225.8	30164.6	81334.8	62743.3	82335.4
FERM, ARHGEF and pleckstrin domain-containing protein 2 (Fragment) OS=Homo sapiens OX=9606 GN=FARP2 PE=1 SV=2	7	3	5	51.6			25169	15458.3	49399.6	35595.3	38132.8
Glucosidase 2 subunit beta OS=Homo sapiens OX=9606 GN=PRKCSH PE=1 SV=1	4	2	5	60.2	PRKCSH	115348		24068.1	70397.7	53762.3	46569.8
Glutamate dehydrogenase 1, mitochondrial OS=Homo sapiens OX=9606 GN=GLUD1 PE=1 SV=2	4	2	5	61.4	GLUD1	224753	52567.6	37483.2	124637	79066.4	60809.4
GMP synthase [glutamine-hydrolyzing] OS=Homo sapiens OX=9606 GN=GMPS PE=1 SV=1	5	4	5	76.7	GMPS	693865	26617.3	30903.8	78842.9	91600.5	25787.4
Golgi-specific brefeldin A-resistance guanine nucleotide exchange factor 1 OS=Homo sapiens OX=9606 GN=GBF1 PE=1 SV=2	1	1	5	206.3	GBF1	23949	8265.95	7010.98	31267.8	18217	13756
Guanine nucleotide-binding protein G(i) subunit alpha OS=Homo sapiens OX=9606 GN=GNAI3 PE=1 SV=3	7	2	5	40.5	GNAI3	123495	99053.7	18973.3	131513	91697.3	97701.8
Heterochromatin protein 1-binding protein 3 OS=Homo sapiens OX=9606 GN=HP1BP3 PE=1 SV=1	8	4	5	61.2	HP1BP3	416291	91659.3	73427.3	570419	448755	410778
Heterogeneous nuclear ribonucleoprotein L (Fragment) OS=Homo sapiens OX=9606 GN=HNRNPL PE=1 SV=1	5	3	5	59.2		1.14414e+06	313739	155880	554516	434981	398535
Histone acetyltransferase p300 OS=Homo sapiens OX=9606 GN=EP300 PE=1 SV=2	3	4	5	264	EP300		15728.6		53890	31784.2	46920.5
Importin-9 OS=Homo sapiens OX=9606 GN=IPO9 PE=1 SV=3	3	2	5	115.9	IPO9	113540	71734	36667.8	90238.1	56032.7	89459.2
Inhibitor of nuclear factor kappa-B kinase subunit beta OS=Homo sapiens OX=9606 GN=IKBKB PE=1 SV=1	5	2	5	42.7		171754	184756	29471.4	211605	115743	242901
Insulin-degrading enzyme OS=Homo sapiens OX=9606 GN=IDE PE=1 SV=4	3	3	5	117.9	IDE	70617	69476.9	2682.88	120058	78141.3	73502.5
Insulin-like growth factor-binding protein 3 OS=Homo sapiens OX=9606 GN=IGFBP3 PE=1 SV=1	3	1	5	29	IGFBP3	105615	78089.6	13769.3	119220	137858	356141
Intercellular adhesion molecule 1 OS=Homo sapiens OX=9606 GN=ICAM1 PE=1 SV=2	11	4	5	57.8	ICAM1	237921	81275.4	28035.6	7547.67	19654.4	25823.3
Intraflagellar transport protein 122 homolog OS=Homo sapiens OX=9606 GN=IFT122 PE=1 SV=2	4	4	5	141.7	IFT122	48876.9	41474.5	9809.69	93479.7	71490.6	95206
Isocitrate dehydrogenase [NADP], mitochondrial OS=Homo sapiens OX=9606 GN=IDH2 PE=1 SV=2	5	2	5	50.9	IDH2	86338.5	53538	31363.1	105102	92424.7	103177
Katanin p80 WD40 repeat-containing subunit B1 OS=Homo sapiens OX=9606 GN=KATNB1 PE=1 SV=1	7	3	5	72.3	KATNB1	62790.7	31024.2	15986.3	42705.1	39751.5	59650.8
Kinesin light chain OS=Homo sapiens OX=9606 GN=KLC1 PE=1 SV=1	7	4	5	68.7	KLC1	459874	110017	39993.3	182947	99605.1	101330
Kinesin-like protein KIF16B (Fragment) OS=Homo sapiens OX=9606 GN=KIF16B PE=1 SV=1	3	1	5	80.5		116383	33066.6	46620.6	79190.9	134343
Kinesin-like protein OS=Homo sapiens OX=9606 GN=KIFC3 PE=1 SV=1	3	2	5	81.3	KIFC3	28386.5	60074.3	21648.2	66091.3	56615.1	120186
Lethal(2) giant larvae protein homolog 1 OS=Homo sapiens OX=9606 GN=LLGL1 PE=1 SV=3	3	3	5	115.3	LLGL1	42347.5	22985	10852.1	26290.1	54332.5	46797.1
Leucine-rich repeat and WD repeat-containing protein 1 OS=Homo sapiens OX=9606 GN=LRWD1 PE=1 SV=2	5	2	5	70.8	LRWD1	57056.4	20353.1		328926	27656.1	19007.8
Leucine-rich repeat-containing protein 1 OS=Homo sapiens OX=9606 GN=LRRC1 PE=1 SV=1	5	2	5	59.2	LRRC1	50400.9	28130.8	6497.5	140395	78523.4	147201
Lipase maturation factor 2 OS=Homo sapiens OX=9606 GN=LMF2 PE=1 SV=2	5	2	5	79.6	LMF2	101608	85032	72282.7	227526	149528	95954.1
Liprin-beta-1 OS=Homo sapiens OX=9606 GN=PPFIBP1 PE=1 SV=2	4	3	5	114	PPFIBP1	57171.4	22073.1	6568.06	111147	122888	122159
Lon protease homolog, mitochondrial OS=Homo sapiens OX=9606 GN=LONP1 PE=1 SV=1	4	3	5	95.1		225843	100040	25210.1	155345	164246	245688
Lupus La protein OS=Homo sapiens OX=9606 GN=SSB PE=1 SV=2	10	4	5	46.8	SSB	672840	73735.5	27921.7	387207	281760	586388
Lysine-specific histone demethylase 1A OS=Homo sapiens OX=9606 GN=KDM1A PE=1 SV=2	5	3	5	92.8	KDM1A	19087.3	10600		8312.33	29700.6	43831.7
Magnesium transporter protein 1 OS=Homo sapiens OX=9606 GN=MAGT1 PE=1 SV=1	3	1	5	38	MAGT1	134346	100324	56182.7	204266	182250	216706
Malectin OS=Homo sapiens OX=9606 GN=MLEC PE=1 SV=1	9	2	5	32.2	MLEC	165291	32189.4	21803.9	96036.9	78109.4	35865.6
Malonate--CoA ligase ACSF3, mitochondrial OS=Homo sapiens OX=9606 GN=ACSF3 PE=1 SV=1	5	1	5	35.1	ACSF3	86112.8	50638.4	14490	91946.4	89635.4	131774
Manganese-transporting ATPase 13A1 OS=Homo sapiens OX=9606 GN=ATP13A1 PE=1 SV=2	3	3	5	132.9	ATP13A1	57950.9	75867.4	20989.7	99002.6	51504.3	147431
Mediator of RNA polymerase II transcription subunit 16 OS=Homo sapiens OX=9606 GN=MED16 PE=1 SV=2	3	2	5	96.7	MED16	48399.7	18428.3		41372.9	29776.2	55403.3
Minor histocompatibility antigen H13 OS=Homo sapiens OX=9606 GN=HM13 PE=1 SV=1	5	2	5	46.3		108702	31044.7	35934.9	107513	65199.4	12222.9
Mitochondrial import inner membrane translocase subunit Tim22 OS=Homo sapiens OX=9606 GN=TIMM22 PE=1 SV=2	8	1	5	20	TIMM22	25402.5	20328	6074.64	34676.1	23927	40821.6
Mitochondrial import inner membrane translocase subunit Tim23 OS=Homo sapiens OX=9606 GN=TIMM23 PE=1 SV=1	13	2	5	21.9	TIMM23	85688.7	143690	72351.7	218484	200534	162404
Mitochondrial Rho GTPase 2 (Fragment) OS=Homo sapiens OX=9606 GN=RHOT2 PE=1 SV=1	16	3	5	23.7		358999	146680	79746.2	298704	185551	231840
Mitogen-activated protein kinase kinase kinase kinase 4 OS=Homo sapiens OX=9606 GN=MAP4K4 PE=1 SV=1	3	2	5	132.1		23277.8		12184.9	38750.6	30789.2
Mitotic deacetylase-associated SANT domain protein (Fragment) OS=Homo sapiens OX=9606 GN=MIDEAS PE=1 SV=6	6	4	5	111.8		57256.4	28713.8	18709.8	91081.6	89110.1	120308
Mitotic-spindle organizing protein 2B OS=Homo sapiens OX=9606 GN=MZT2B PE=1 SV=1	20	2	5	22.3	MZT2B	16948.1	24139.4	16075.7	52959.8	36286	34244.5
MTMR1 protein OS=Homo sapiens OX=9606 GN=MTMR1 PE=1 SV=1	14	3	5	39.8	MTMR1	45410.1	18545.6	6065.25	41405.2	35849.4	48603.5
Myeloid leukemia factor 2 OS=Homo sapiens OX=9606 GN=MLF2 PE=1 SV=1	5	1	5	28.1	MLF2	675784	435273	444049	949713	807539	424981
NAD-dependent malic enzyme, mitochondrial OS=Homo sapiens OX=9606 GN=ME2 PE=1 SV=1	4	2	5	65.4	ME2	53647.7		13328.3	20826.6	50354.6	77050.2
NADH dehydrogenase [ubiquinone] 1 alpha subcomplex subunit 12 OS=Homo sapiens OX=9606 GN=NDUFA12 PE=1 SV=1	12	1	5	17.1	NDUFA12	37409.9	20658.1		39920.2	26714.9	55485.8
NADH dehydrogenase [ubiquinone] 1 beta subcomplex subunit 4 OS=Homo sapiens OX=9606 GN=NDUFB4 PE=1 SV=3	22	2	5	15.2	NDUFB4	172491	109276	44807.3	160037	146962	376758
NADH dehydrogenase [ubiquinone] 1 beta subcomplex subunit 9 OS=Homo sapiens OX=9606 GN=NDUFB9 PE=1 SV=3	20	2	5	21.8	NDUFB9	67161	43358.9	3478.65	41190.4	35672.7	103674
NADH dehydrogenase [ubiquinone] iron-sulfur protein 2, mitochondrial OS=Homo sapiens OX=9606 GN=NDUFS2 PE=1 SV=2	6	2	5	52.5	NDUFS2	127181	159932	95004.2	234177	163762	182202
N-terminal kinase-like protein OS=Homo sapiens OX=9606 GN=SCYL1 PE=1 SV=1	7	4	5	89.6	SCYL1	131010	110836	46191.7	172381	125130	202024
Nuclear factor 1 B-type OS=Homo sapiens OX=9606 GN=NFIB PE=1 SV=2	5	2	5	47.4	NFIB	45204.7	28153.1	4759.48	17020.3	22098.5	46200.3
Nuclear pore complex protein Nup107 OS=Homo sapiens OX=9606 GN=NUP107 PE=1 SV=1	3	2	5	106.3	NUP107	101985	24749.7	12598.2	35228.4	42021.9	35447
Nuclear receptor-interacting protein 1 OS=Homo sapiens OX=9606 GN=NRIP1 PE=1 SV=2	4	3	5	126.9	NRIP1	63252.5	72145.5	31798.7	92420.1	82053.7	90020.4
Nucleoside diphosphate kinase 3 OS=Homo sapiens OX=9606 GN=NME3 PE=1 SV=2	10	1	5	19	NME3	36015.1	21067.4	5133.13	31869.9	25481.4	23514.5
Obg-like ATPase 1 OS=Homo sapiens OX=9606 GN=OLA1 PE=1 SV=2	7	3	5	44.7	OLA1	567132	99425.8	43300.7	75752.1	106942	174700
ORM1-like protein 3 OS=Homo sapiens OX=9606 GN=ORMDL3 PE=1 SV=1	10	1	5	17.5	ORMDL3	39194	21632.7	18972.9	45059.7	39690	20923.9
Oxysterol-binding protein-related protein 10 OS=Homo sapiens OX=9606 GN=OSBPL10 PE=1 SV=2	4	2	5	83.9	OSBPL10	329992	229274	89922.6	164035	233356	242822
Oxysterol-binding protein-related protein 9 OS=Homo sapiens OX=9606 GN=OSBPL9 PE=1 SV=2	6	3	5	83.1	OSBPL9	128378	57571.7	28380.9	90023	96593.8	52212.2
Pachytene checkpoint protein 2 homolog OS=Homo sapiens OX=9606 GN=TRIP13 PE=1 SV=2	6	2	5	48.5	TRIP13	136896	44289.1	21113.7	77721.2	73053.1	87424.8
Partner of Y14 and mago OS=Homo sapiens OX=9606 GN=PYM1 PE=1 SV=1	21	3	5	22.6	WIBG; PYM1	49458.5	11101.8	7146.27	51455.1	100739	31164.9
Phosphorylase b kinase regulatory subunit beta OS=Homo sapiens OX=9606 GN=PHKB PE=1 SV=3	2	3	5	124.8	PHKB	207736	156379	69076.3	198924	142758	152795
Pleckstrin homology-like domain family A member 3 OS=Homo sapiens OX=9606 GN=PHLDA3 PE=1 SV=1	14	2	5	13.9	PHLDA3	179978	187316	51444.7	477247	383959	415440
Pleiotropic regulator 1 (Fragment) OS=Homo sapiens OX=9606 GN=PLRG1 PE=1 SV=1	9	1	5	23.5		51494.3	20367.5	8633.76	43539.2	35352.5	50869.6
PPP1R18 OS=Homo sapiens OX=9606 GN=PPP1R18 PE=1 SV=1	3	2	5	68	PPP1R18	106756	39545.1	52439.8	111415	97925.8	43068.2
PRA1 family protein 2 OS=Homo sapiens OX=9606 GN=PRAF2 PE=1 SV=1	6	1	5	19.2	PRAF2	78400	30428.4	20308.8	70499.5	81774.4	96708.8
Probable ATP-dependent RNA helicase DDX52 OS=Homo sapiens OX=9606 GN=DDX52 PE=1 SV=3	2	1	5	67.5	DDX52	29769.3	11598.1	8256.17	40767.6	32841	32171.7
Probable ATP-dependent RNA helicase DHX34 OS=Homo sapiens OX=9606 GN=DHX34 PE=1 SV=2	2	2	5	128	DHX34	95603	60636.2	11444.5	118191	141174	138648
Probable fibrosin-1 OS=Homo sapiens OX=9606 GN=FBRS PE=1 SV=3	10	3	5	48.4	FBRS	88465.3	64365.5	26110.7	113919	101645	136475
Proline and serine-rich protein 3 (Fragment) OS=Homo sapiens OX=9606 GN=PROSER3 PE=1 SV=1	9	3	5	48.6		193511	207046	58073	144402	151251	225427
Prolow-density lipoprotein receptor-related protein 1 OS=Homo sapiens OX=9606 GN=LRP1 PE=1 SV=2	1	3	5	504.3	LRP1	81174	142302	55810.8	349223	159510	191972
Prolyl 4-hydroxylase subunit alpha-1 OS=Homo sapiens OX=9606 GN=P4HA1 PE=1 SV=2	3	1	5	61	P4HA1	59743.2	26728.3	28940.2	95697.4	63750.7	23245
Prostacyclin synthase OS=Homo sapiens OX=9606 GN=PTGIS PE=1 SV=1	7	3	5	57.1	PTGIS	73771.3	71650.7	36037.3	252122	236841	378376
Protein CLEC16A OS=Homo sapiens OX=9606 GN=CLEC16A PE=1 SV=2	2	1	5	117.6	CLEC16A	43294.9	17730.2	15490.4	70285.1	75597.3	125843
Protein lin-7 homolog B OS=Homo sapiens OX=9606 GN=LIN7B PE=1 SV=1	11	2	5	22.9	LIN7B	44175.9	26262.3	5549.19	18444.7	5841.98
Protein S100-A8 OS=Homo sapiens OX=9606 GN=S100A8 PE=1 SV=1	31	3	5	10.8	S100A8		15092.7		978975	233589	209306
Protein SON OS=Homo sapiens OX=9606 GN=SON PE=1 SV=4	2	4	5	263.7	SON	494002	57739.5	4619.55	46778.7	49625.6	163228
Protein TFG OS=Homo sapiens OX=9606 GN=TFG PE=1 SV=2	5	2	5	43.4	TFG	100672	94192.7	94255.8	185994	142725	38257.9
Protein VAC14 homolog OS=Homo sapiens OX=9606 GN=VAC14 PE=1 SV=1	5	3	5	87.9	VAC14	135005	82583.1	47436.7	181073	148583	116185
Protein YIF1A OS=Homo sapiens OX=9606 GN=YIF1A PE=1 SV=2	10	2	5	32	YIF1A	117055	142286	47208.7	180393	133372	166288
Putative RNA-binding protein Luc7-like 1 OS=Homo sapiens OX=9606 GN=LUC7L PE=1 SV=1	15	5	5	43.7	LUC7L	49908.5			10383.6
Rab3 GTPase-activating protein non-catalytic subunit OS=Homo sapiens OX=9606 GN=RAB3GAP2 PE=1 SV=1	3	3	5	155.9	RAB3GAP2	188863	112659	67853.7	167670	132360	151049
Ran-binding protein 10 OS=Homo sapiens OX=9606 GN=RANBP10 PE=1 SV=1	4	2	5	67.2	RANBP10	58222.6	14952.6	7345.27	34134	38383.2	29986.7
Ras-related protein Rab-14 OS=Homo sapiens OX=9606 GN=RAB14 PE=1 SV=4	11	2	5	23.9	RAB14	198530	84649	76770.7	187049	134445	81887.2
Ras-related protein Rab-2A OS=Homo sapiens OX=9606 GN=RAB2A PE=1 SV=1	19	3	5	23.5	RAB2A	374421	145948	22797	297686	136802	131190
Ras-related protein Rab-34 OS=Homo sapiens OX=9606 GN=RAB34 PE=1 SV=1	5	1	5	29	RAB34	72876.3	35180	36287.9	143044	90042.3	62730.6
Ras-related protein Rab-8A OS=Homo sapiens OX=9606 GN=RAB8A PE=1 SV=1	19	3	5	23.7	RAB8A	84300.1	23578.4	14112.6	53230.5	50739.9	88430.6
Ras-related protein Rap-2c OS=Homo sapiens OX=9606 GN=RAP2C PE=1 SV=1	11	2	5	20.7	RAP2C	249524	110159				46946.5
Recombining binding protein suppressor of hairless OS=Homo sapiens OX=9606 GN=RBPJ PE=1 SV=3	2	1	5	55.6	RBPJ	75799	115636	30728.9	100207	70855.4	79743.3
RecQ-mediated genome instability protein 2 OS=Homo sapiens OX=9606 GN=RMI2 PE=1 SV=1	14	1	5	11.8		113540	27673.6	15293.7	61907	34972	50607.8
Rho-related GTP-binding protein RhoG OS=Homo sapiens OX=9606 GN=RHOG PE=1 SV=1	10	2	5	21.3	RHOG	445446	138531	67938.5	162235	134970	126730
Ribonucleases P/MRP protein subunit POP1 OS=Homo sapiens OX=9606 GN=POP1 PE=1 SV=2	3	2	5	114.6	POP1	39392.7	13114.1	5038.26	52944	55785.4	43228.7
Ribonucleoside-diphosphate reductase subunit M2 OS=Homo sapiens OX=9606 GN=RRM2 PE=1 SV=1	17	4	5	42.9		228675	30581.6	9276.12	44994.9	39762.4	16535.8
RNA demethylase ALKBH5 OS=Homo sapiens OX=9606 GN=ALKBH5 PE=1 SV=2	10	2	5	44.2	ALKBH5	186712	112617	21013	109143	122563	192126
RNA helicase OS=Homo sapiens OX=9606 GN=DDX46 PE=1 SV=1	2	2	5	117.4	DDX46	213138	51835.6	44591.6	86638.5	62318.6	84662.5
RNA helicase OS=Homo sapiens OX=9606 GN=DHX16 PE=1 SV=1	6	3	5	63.4	DHX16	72121.1	73699.1	34508	163455	131898	148023
RNA polymerase II-associated protein 3 OS=Homo sapiens OX=9606 GN=RPAP3 PE=1 SV=2	5	2	5	75.7	RPAP3	143128	47612	31309.1	78143.6	71433.2	53148
RNA-binding protein PNO1 OS=Homo sapiens OX=9606 GN=PNO1 PE=1 SV=1	19	2	5	15.2		68841.1	10513.4	11366.8	108382	82609.7	29077.3
RRP12-like protein OS=Homo sapiens OX=9606 GN=RRP12 PE=1 SV=2	3	3	5	143.6	RRP12	127451	26169.9	12855.7	214339	198845	196943
Sarcoplasmic/endoplasmic reticulum calcium ATPase 3 OS=Homo sapiens OX=9606 GN=ATP2A3 PE=1 SV=3	5	3	5	109.2		56436.3
Serine protease HTRA1 OS=Homo sapiens OX=9606 GN=HTRA1 PE=1 SV=1	8	3	5	51.3	HTRA1	44470.7	43484.4	34166	174895	143226	107484
Serine/arginine-rich splicing factor 5 OS=Homo sapiens OX=9606 GN=SRSF5 PE=1 SV=1	8	2	5	31.2	SRSF5						39987.4
Serine/threonine-protein kinase TAO2 OS=Homo sapiens OX=9606 GN=TAOK2 PE=1 SV=2	2	2	5	138.2	TAOK2	136873	116843	50333.8	211186	180175	51736.2
Serine/threonine-protein kinase tousled-like 1 OS=Homo sapiens OX=9606 GN=TLK1 PE=1 SV=2	3	2	5	86.6	TLK1	51191.3			6980.96	5207.64
Serpin B8 (Fragment) OS=Homo sapiens OX=9606 GN=SERPINB8 PE=1 SV=1	14	2	5	18.3		22843.8	16689.6	6896.68	49655.6	28619.7	17052.8
Sister chromatid cohesion protein PDS5 homolog A OS=Homo sapiens OX=9606 GN=PDS5A PE=1 SV=1	4	3	5	150.7	PDS5A	107951	11776.6	12230.7	77265.5	48660.7	36299.1
Small kinetochore-associated protein OS=Homo sapiens OX=9606 GN=KNSTRN PE=1 SV=2	11	2	5	35.4	C15orf23; KNSTRN	233559	28501.2	12223.6	91589.1	69370	51408.3
SNARE-associated protein Snapin OS=Homo sapiens OX=9606 GN=SNAPIN PE=1 SV=1	16	1	5	14.9	SNAPIN	120417		15928.5	49366.4
Sorcin OS=Homo sapiens OX=9606 GN=SRI PE=1 SV=1	11	2	5	21.7	SRI	190213	79186.8	53878.9	161578	115756	128081
Sorting nexin-5 (Fragment) OS=Homo sapiens OX=9606 GN=SNX5 PE=1 SV=7	13	2	5	26.6		71487.7	10703	5941.22	17881.2	18162.4	39443
SRSF protein kinase 1 (Fragment) OS=Homo sapiens OX=9606 GN=SRPK1 PE=1 SV=1	4	2	5	76		651304	49578.5	18350.5	187572	121624	158048
Striatin OS=Homo sapiens OX=9606 GN=STRN PE=1 SV=4	3	1	5	86.1	STRN	31880.4	5362.33	4144.63	11356.4	17524.2	16322
SWI/SNF-related matrix-associated actin-dependent regulator of chromatin subfamily A member 5 OS=Homo sapiens OX=9606 GN=SMARCA5 PE=1 SV=1	4	2	5	121.8	SMARCA5	131125	24169.9	10449.2	73455.7	52355.3	27053.7
Synaptic functional regulator FMR1 OS=Homo sapiens OX=9606 GN=FMR1 PE=1 SV=1	3	2	5	71.1	FMR1	45647.9	34050.1	16342.1	104259	64644.8	60096.5
Synaptosomal-associated protein 47 OS=Homo sapiens OX=9606 GN=SNAP47 PE=1 SV=1	4	1	5	47.3	SNAP47	22447.4	16499.8		22063.9	15262	16960.8
Tensin-2 OS=Homo sapiens OX=9606 GN=TNS2 PE=1 SV=2	2	2	5	152.5	TENC1; TNS2		4965.62	4124.55	17297.8	16115.2	16932.9
Tetratricopeptide repeat protein 21B OS=Homo sapiens OX=9606 GN=TTC21B PE=1 SV=1	2	2	5	145.9		37118.4	34533.9	5150.52	59431.3	58800	58148.3
Torsin-1A-interacting protein 2 OS=Homo sapiens OX=9606 GN=TOR1AIP2 PE=1 SV=1	5	2	5	51.2	TOR1AIP2	99850.6	102734	67238.2	154148	133516	159874
Trafficking protein particle complex subunit 6B OS=Homo sapiens OX=9606 GN=TRAPPC6B PE=1 SV=1	14	2	5	18	TRAPPC6B	271437	195300	101148	271902	216885	232329
TRAF-type zinc finger domain-containing protein 1 OS=Homo sapiens OX=9606 GN=TRAFD1 PE=1 SV=1	5	3	5	64.8	TRAFD1	494313	52289.3	42235.7	80178.4	63624.1	40392.6
Transaldolase OS=Homo sapiens OX=9606 GN=TALDO1 PE=1 SV=2	10	3	5	37.5	TALDO1	212492	39013.5	19572.6	61862.5	28523.2	55840.2
Transcription factor 12 (Fragment) OS=Homo sapiens OX=9606 GN=TCF12 PE=1 SV=1	7	3	5	71.8	TCF12	108927	113175	74237.3	172917	97231.5	42209.5
Transcription factor E3 OS=Homo sapiens OX=9606 GN=TFE3 PE=1 SV=4	3	2	5	61.5	TFE3	87883.9	79061.5	47597.6	91596.4	66526.4	76584.1
Transcription initiation factor TFIID subunit 4 OS=Homo sapiens OX=9606 GN=TAF4 PE=1 SV=2	8	5	5	110	TAF4	138460	6232.99		11769.2	6877.89	11772.4
Translocon-associated protein subunit delta OS=Homo sapiens OX=9606 GN=SSR4 PE=1 SV=1	8	1	5	19	SSR4	306239	160749	66333.3	231182	131070	97977.5
Tyrosine-protein phosphatase non-receptor type 12 OS=Homo sapiens OX=9606 GN=PTPN12 PE=1 SV=3	9	5	5	88.1	PTPN12	231014	17599.5	3953.69	16254	22706.9	29170.2
U4/U6 small nuclear ribonucleoprotein Prp3 OS=Homo sapiens OX=9606 GN=PRPF3 PE=1 SV=2	2	1	5	77.5	PRPF3	43145.4	22711.7	7096.42	43036.3	37354	52039.6
U4/U6.U5 tri-snRNP-associated protein 1 OS=Homo sapiens OX=9606 GN=SART1 PE=1 SV=1	7	4	5	90.2	SART1	51580.1			181750	191570	190484
U6 snRNA-associated Sm-like protein LSm3 OS=Homo sapiens OX=9606 GN=LSM3 PE=1 SV=2	12	1	5	11.8	LSM3	247282	119848	39848.3	129533	175851	266722
Ubiquitin thioesterase OS=Homo sapiens OX=9606 GN=OTUB1 PE=1 SV=2	9	2	5	31.4		142569	39276.7	5899.64	40105.6	32317.8	55573.9
Uncharacterized protein C1orf122 OS=Homo sapiens OX=9606 GN=C1orf122 PE=4 SV=2	10	1	5	11.5	C1orf122	129232	26113.9	16279.9	57818.4	58619.3	30334.3
Uncharacterized protein OS=Homo sapiens OX=9606 PE=1 SV=2	9	2	5	31.2		69296.4	19197.3	43484.8	131276	117522	136089
Vacuolar protein sorting-associated protein 13A OS=Homo sapiens OX=9606 GN=VPS13A PE=1 SV=2	1	2	5	360	VPS13A	37689.9	43041.3	23036.4	102730	59272.1	68846.2
Very-long-chain (3R)-3-hydroxyacyl-CoA dehydratase 3 OS=Homo sapiens OX=9606 GN=HACD3 PE=1 SV=2	6	2	5	43.1	PTPLAD1; HACD3	146965	91283.1	34249.3	207720	160225	124444
Vesicular integral-membrane protein VIP36 OS=Homo sapiens OX=9606 GN=LMAN2 PE=1 SV=1	6	2	5	36.5		161327	260773	55589.7	293808	187177	274321
WD repeat-containing protein 6 OS=Homo sapiens OX=9606 GN=WDR6 PE=1 SV=1	2	2	5	124.9	WDR6	158305	112311	52761.3	162249	113118	117070
Zinc finger CCHC domain-containing protein 8 OS=Homo sapiens OX=9606 GN=ZCCHC8 PE=1 SV=2	6	3	5	78.5	ZCCHC8	174933	108442	46665.7	141563	140238	204418
Zinc finger protein 217 OS=Homo sapiens OX=9606 GN=ZNF217 PE=1 SV=1	2	1	5	115.2	ZNF217	27960.7	16291	5589.5	31000.8	15375.9	14906.3
Zinc finger Ran-binding domain-containing protein 2 OS=Homo sapiens OX=9606 GN=ZRANB2 PE=1 SV=2	8	3	5	37.4	ZRANB2		5731.86		6.32959e+06	3.27906e+06	4.6161e+06
2',5'-phosphodiesterase 12 OS=Homo sapiens OX=9606 GN=PDE12 PE=1 SV=1	3	1	4	52.1	PDE12	83832.2	26111.3	5553.86	25973	22090.5	56739.6
28S ribosomal protein S31, mitochondrial OS=Homo sapiens OX=9606 GN=MRPS31 PE=1 SV=3	5	2	4	45.3	MRPS31	13863.5	62051.2	27172.5	187786	131417	100075
3'-5' RNA helicase YTHDC2 OS=Homo sapiens OX=9606 GN=YTHDC2 PE=1 SV=2	2	3	4	160.1	YTHDC2	150356	52649.3	17997	140174	117515	158447
39S ribosomal protein L19, mitochondrial OS=Homo sapiens OX=9606 GN=MRPL19 PE=1 SV=2	6	2	4	33.5	MRPL19	104078	39111.4	6463.8	74911.4	45109.1	104873
39S ribosomal protein L24, mitochondrial OS=Homo sapiens OX=9606 GN=MRPL24 PE=1 SV=1	13	2	4	24.9	MRPL24	35019.6	38194.6		112384	94841.3	137797
45 kDa calcium-binding protein OS=Homo sapiens OX=9606 GN=SDF4 PE=1 SV=1	3	1	4	40.9		126429	117316	21542.5	121802	127113	211812
60S ribosomal protein L22-like 1 OS=Homo sapiens OX=9606 GN=RPL22L1 PE=1 SV=1	10	1	4	14.5	RPL22L1	323753	194631	22030.3	228360	179297	379594
6-phosphogluconolactonase (Fragment) OS=Homo sapiens OX=9606 GN=PGLS PE=1 SV=1	7	1	4	23		29841.2	14201.3	20388.3	36154.9	20812.4	36701
Activating signal cointegrator 1 complex subunit 2 OS=Homo sapiens OX=9606 GN=ASCC2 PE=1 SV=3	1	1	4	86.3	ASCC2	129122	74676.3	62571.1	258785	215053	140821
ADP-ribosylation factor GTPase-activating protein 2 OS=Homo sapiens OX=9606 GN=ARFGAP2 PE=1 SV=1	7	2	4	42.1	ARFGAP2	179802	29561.3	14146.1	63957.8	48479.4	42591.9
ADP-ribosylation factor-like protein 6-interacting protein 4 OS=Homo sapiens OX=9606 GN=ARL6IP4 PE=1 SV=1	16	3	4	25.6		654351			15123.7	3762.24
ADP-sugar pyrophosphatase OS=Homo sapiens OX=9606 GN=NUDT5 PE=1 SV=1	12	2	4	25.9		94002.3	7409.05	5215.98	18440.5	15833.3	11459.6
Alpha-2-macroglobulin OS=Homo sapiens OX=9606 GN=A2M PE=1 SV=3	1	2	4	163.2	A2M	52377.1	61355.1	13792.5	82318.1	52040.7	163022
Alpha-aminoadipic semialdehyde dehydrogenase OS=Homo sapiens OX=9606 GN=ALDH7A1 PE=1 SV=1	8	3	4	58.1		54857.1	34591.6	19768.6	49251.5	45964.8	59601.4
Alpha-mannosidase 2 OS=Homo sapiens OX=9606 GN=MAN2A1 PE=1 SV=2	2	2	4	131.1	MAN2A1		8286.44	11281.3	23833.3
Alpha-taxilin OS=Homo sapiens OX=9606 GN=TXLNA PE=1 SV=3	10	2	4	61.9	TXLNA	70533.7			77446.9	64354.6
Amphiphysin OS=Homo sapiens OX=9606 GN=AMPH PE=1 SV=1	6	3	4	76.2	AMPH	41097.8	12950.8	23465	321077	227661	246742
AP-4 complex subunit mu-1 OS=Homo sapiens OX=9606 GN=AP4M1 PE=1 SV=2	3	1	4	49.9	AP4M1	50032.6	45365.2	17274.2	81655.8	53089	26985.8
Apoptotic chromatin condensation inducer in the nucleus OS=Homo sapiens OX=9606 GN=ACIN1 PE=1 SV=1	3	3	4	145.4		76224	10831.2		29745.1	21786.1	24921
Arfaptin-1 OS=Homo sapiens OX=9606 GN=ARFIP1 PE=1 SV=2	4	1	4	41.7	ARFIP1	54703.2	27504.9	32347.9	95653.7	66344.7	56258.1
Arf-GAP domain and FG repeat-containing protein 1 OS=Homo sapiens OX=9606 GN=AGFG1 PE=1 SV=1	6	2	4	56.4		90202.3	32753.9	24867.4	78936	80162.8	74616.7
Aspartate aminotransferase, mitochondrial OS=Homo sapiens OX=9606 GN=GOT2 PE=1 SV=3	6	2	4	47.5	GOT2	19450.5	27471.6	10551.4	40276.8	41954.7	75965.6
ATP synthase subunit ATP5MPL, mitochondrial OS=Homo sapiens OX=9606 GN=ATP5MPL PE=1 SV=1	16	1	4	6.7	C14orf2		159133	53860.7	274192	183027	183791
ATP synthase subunit e, mitochondrial OS=Homo sapiens OX=9606 GN=ATP5ME PE=1 SV=2	32	2	4	7.9	ATP5I	113169	107983	73490	271320	190780	138105
BAG family molecular chaperone regulator 2 OS=Homo sapiens OX=9606 GN=BAG2 PE=1 SV=1	9	2	4	23.8	BAG2	229633	121917	24100	127461	73326.6	52889.4
Band 4.1-like protein 2 OS=Homo sapiens OX=9606 GN=EPB41L2 PE=1 SV=1	4	3	4	104.3	EPB41L2	130923	19250.9	7891.65	23015.4	16388.1
Bardet-Biedl syndrome 1 protein OS=Homo sapiens OX=9606 GN=BBS1 PE=1 SV=1	9	1	4	17.4		15615.8	40625.7		51134.8	33614.2	29347.7
Beta-parvin OS=Homo sapiens OX=9606 GN=PARVB PE=1 SV=1	6	2	4	41.7	PARVB	67067.1	8826.94
Bifunctional polynucleotide phosphatase/kinase OS=Homo sapiens OX=9606 GN=PNKP PE=1 SV=1	8	3	4	57	PNKP	54175.1	13814.7	10832.6	30706.7	15037.2	25734.1
Calcium/calmodulin-dependent protein kinase type II subunit gamma (Fragment) OS=Homo sapiens OX=9606 GN=CAMK2G PE=1 SV=1	23	4	4	37		29065.6	13387.7		24329.6	19113.5
Calmodulin OS=Homo sapiens OX=9606 GN=CALM2 PE=1 SV=1	32	2	4	7.4		506324	139798	51042.1	183357	205158	373321
Calnexin OS=Homo sapiens OX=9606 GN=CANX PE=1 SV=2	4	3	4	67.5	CANX	450613	116773	88853.6	309025	214666	312553
Calpain-2 catalytic subunit OS=Homo sapiens OX=9606 GN=CAPN2 PE=1 SV=6	2	2	4	79.9	CAPN2	214636	238162	54387.2	263239	237729	339996
Carbonyl reductase family member 4 OS=Homo sapiens OX=9606 GN=CBR4 PE=1 SV=3	11	2	4	25.3	CBR4	37176	20204		36832	44858.7	109386
Caveolae-associated protein 1 OS=Homo sapiens OX=9606 GN=CAVIN1 PE=1 SV=1	7	2	4	43.5	PTRF; CAVIN1	25578.7	27150.1	33602.2	136269	143812	54675.7
CD166 antigen OS=Homo sapiens OX=9606 GN=ALCAM PE=1 SV=2	5	2	4	65.1	ALCAM	184140	100107	55345.1	184492	167509	78134.5
CDP-diacylglycerol--inositol 3-phosphatidyltransferase OS=Homo sapiens OX=9606 GN=CDIPT PE=1 SV=1	7	1	4	17.3		69536.5	81927.9	16057.6	88030.3	91543.1	141536
Centrosomal protein of 164 kDa OS=Homo sapiens OX=9606 GN=CEP164 PE=1 SV=3	3	3	4	164.2	CEP164	7448.23	17221.9	9702.72	28318.9	29108.9	80607
Centrosomal protein of 44 kDa (Fragment) OS=Homo sapiens OX=9606 GN=CEP44 PE=1 SV=1	7	1	4	22.3		114603	13918.3	6663.95	21092.4	25005.1
Centrosomal protein of 85 kDa OS=Homo sapiens OX=9606 GN=CEP85 PE=1 SV=1	6	3	4	85.6	CEP85	118168	38001	12117.9	97156.4	84767.5	45882
Clathrin interactor 1 OS=Homo sapiens OX=9606 GN=CLINT1 PE=1 SV=1	4	2	4	68.2	CLINT1	177198	47551.9	14596.2	79063.6	49625.8	77074.2
Clathrin light chain OS=Homo sapiens OX=9606 GN=CLTA PE=1 SV=1	3	1	4	27.8		185322	151979	35706.8	269472	210757	122010
Corneodesmosin OS=Homo sapiens OX=9606 GN=CDSN PE=1 SV=1	3	1	4	51.6	CDSN	27735.2	40007.3	11403.7	28971.1	22895.9
Creatine kinase B-type OS=Homo sapiens OX=9606 GN=CKB PE=1 SV=1	17	4	4	42.6	CKB	397355			6856.08	5482.61
C-terminal-binding protein 1 (Fragment) OS=Homo sapiens OX=9606 GN=CTBP1 PE=1 SV=1	11	2	4	18.6		217404	118366	38228.9	150153	94077.2	86517.1
CTP synthase 2 OS=Homo sapiens OX=9606 GN=CTPS2 PE=1 SV=1	2	1	4	65.6	CTPS2	41237.4	16549.7		90181	31839	38355.3
Cytochrome b-c1 complex subunit 1, mitochondrial OS=Homo sapiens OX=9606 GN=UQCRC1 PE=1 SV=3	4	2	4	52.6	UQCRC1	86079.8		20053.9	49266.2	19440
Cytochrome c oxidase subunit NDUFA4 OS=Homo sapiens OX=9606 GN=NDUFA4 PE=1 SV=1	22	2	4	9.4	NDUFA4	150743	176451	19481.3	296900	174390	235679
DAZ-associated protein 1 OS=Homo sapiens OX=9606 GN=DAZAP1 PE=1 SV=1	6	2	4	43.4	DAZAP1	152250	64397.9		51104.9	76094.6	51027.3
dCTP pyrophosphatase 1 OS=Homo sapiens OX=9606 GN=DCTPP1 PE=1 SV=1	19	2	4	18.7	DCTPP1	11206.5	30667		7652.47	5963.48	13076
DDB1- and CUL4-associated factor 10 OS=Homo sapiens OX=9606 GN=DCAF10 PE=1 SV=1	5	2	4	60.5	DCAF10	76230	31001.9		39624.4	52868.9	101601
DENN domain-containing protein 4C OS=Homo sapiens OX=9606 GN=DENND4C PE=1 SV=3	1	1	4	212.6	DENND4C	42032	29167.5	6023.15	36095.4	23679.1	53407.4
Deoxynucleoside triphosphate triphosphohydrolase SAMHD1 OS=Homo sapiens OX=9606 GN=SAMHD1 PE=1 SV=2	2	1	4	72.2	SAMHD1	65961.7	38518.7	28696.6	142640	95337.1	86230.9
Dimethyladenosine transferase 2, mitochondrial OS=Homo sapiens OX=9606 GN=TFB2M PE=1 SV=1	9	3	4	45.3	TFB2M	93350.6	43408.2	7915.14	93175.4	112508	325983
Disabled homolog 2 OS=Homo sapiens OX=9606 GN=DAB2 PE=1 SV=3	3	2	4	82.4	DAB2	48687.7	46478.5	31298.9	287299	269513	296594
DNA methyltransferase 1-associated protein 1 OS=Homo sapiens OX=9606 GN=DMAP1 PE=1 SV=1	3	1	4	53	DMAP1	13312.6	13915.1	13618.7	40739.3	28704.6	15909.2
DNA polymerase delta subunit 3 (Fragment) OS=Homo sapiens OX=9606 GN=POLD3 PE=1 SV=1	11	1	4	12.2			56028.2	24049.2	67416.5	48387.9	70428.1
DNA-directed RNA polymerase I subunit RPA34 OS=Homo sapiens OX=9606 GN=POLR1G PE=1 SV=1	2	1	4	55	CD3EAP	93615	29554.6	14022	88635	52967.8	75098.6
DnaJ homolog subfamily C member 2 OS=Homo sapiens OX=9606 GN=DNAJC2 PE=1 SV=4	5	3	4	72	DNAJC2	762875	18654.8	112891	65710	40827.6	180542
Dolichyl-diphosphooligosaccharide--protein glycosyltransferase subunit DAD1 OS=Homo sapiens OX=9606 GN=DAD1 PE=1 SV=1	25	2	4	9.5		225901	45195.6	24386.9	245858	145664	169857
Doublesex- and mab-3-related transcription factor A1 OS=Homo sapiens OX=9606 GN=DMRTA1 PE=2 SV=1	4	1	4	53.1	DMRTA1	7827.89	5394.27		17624.4	29380.5	20003.3
Dynactin subunit 3 OS=Homo sapiens OX=9606 GN=DCTN3 PE=1 SV=1	6	1	4	19.9	DCTN3	40221.3	39891.7	8825.65	54937.6	26537.4	25740.9
E3 ubiquitin-protein ligase HECTD3 OS=Homo sapiens OX=9606 GN=HECTD3 PE=1 SV=1	2	1	4	97.1	HECTD3	95381.1	70773.6	37816.2	95761.2	79719.1	88546.5
E3 ubiquitin-protein ligase Midline-1 OS=Homo sapiens OX=9606 GN=MID1 PE=1 SV=1	5	2	4	61.7	MID1	53785.5	34120.1	26763.2	64763.6	41147.3	44791.6
E3 ubiquitin-protein ligase RBX1 OS=Homo sapiens OX=9606 GN=RBX1 PE=1 SV=1	19	2	4	12.3	RBX1	270552	7802.12	20464.6	69199.4	33930
E3 ubiquitin-protein ligase TRIP12 OS=Homo sapiens OX=9606 GN=TRIP12 PE=4 SV=1	2	3	4	228.3		17368.1	7931.8	8549.77	257935	324996	967154
E3 ubiquitin-protein ligase UHRF1 (Fragment) OS=Homo sapiens OX=9606 GN=UHRF1 PE=1 SV=1	5	2	4	55			6614.6	3538.67	19134.3	21637.1
EEF1E1-BLOC1S5 readthrough (NMD candidate) OS=Homo sapiens OX=9606 GN=EEF1E1-BLOC1S5 PE=4 SV=2	13	2	4	17		665856	12739.7		103736	67569.1	73672.4
Electron transfer flavoprotein subunit alpha, mitochondrial (Fragment) OS=Homo sapiens OX=9606 GN=ETFA PE=1 SV=8	21	3	4	24.9		862922	592497	4161.51	826936	650510	702006
Elongation factor 1-beta OS=Homo sapiens OX=9606 GN=EEF1B2 PE=1 SV=3	6	1	4	24.7	EEF1B2	407644	39764.6	16839.7	67191.6	82601.5	128086
Endonuclease G, mitochondrial OS=Homo sapiens OX=9606 GN=ENDOG PE=1 SV=4	10	2	4	32.6	ENDOG	167906	85218.9	8836.1	53602	67296.4	222318
Endoplasmic reticulum-Golgi intermediate compartment protein 1 OS=Homo sapiens OX=9606 GN=ERGIC1 PE=1 SV=1	5	1	4	32.6	ERGIC1	146218	98920.6		61147.5	45916.1	318126
Epidermal growth factor receptor kinase substrate 8 OS=Homo sapiens OX=9606 GN=EPS8 PE=1 SV=1	3	2	4	91.8	EPS8	77586.7	61061.1	32023.2	206503
ER membrane protein complex subunit 3 OS=Homo sapiens OX=9606 GN=EMC3 PE=1 SV=3	5	1	4	29.9	EMC3	36935.9	15842.4	5294.18	39111.6	23376.2	23141.3
ERI1 exoribonuclease 3 OS=Homo sapiens OX=9606 GN=ERI3 PE=1 SV=1	3	1	4	34.7		75434.9	62116.9	27729.8	115523	73577.3	71146.8
Erlin-2 OS=Homo sapiens OX=9606 GN=ERLIN2 PE=1 SV=1	10	3	4	37.8	ERLIN2	369268	220008	42194.7	290321	280161	89725.2
Estradiol 17-beta-dehydrogenase 8 OS=Homo sapiens OX=9606 GN=HSD17B8 PE=1 SV=2	10	2	4	27	HSD17B8	61311.4	55616.2	22961.6	111531	94597.3	144870
Eukaryotic translation initiation factor 6 OS=Homo sapiens OX=9606 GN=EIF6 PE=1 SV=1	10	2	4	26.6	EIF6	1.18794e+06	132168	94364.8	354893	240732	242309
Exosome complex component RRP41 OS=Homo sapiens OX=9606 GN=EXOSC4 PE=1 SV=3	4	1	4	26.4	EXOSC4	116958	70992.2	37115	251157	137776	141282
Exosome RNA helicase MTR4 OS=Homo sapiens OX=9606 GN=MTREX PE=1 SV=3	1	1	4	117.7	SKIV2L2	116723	129380	46239.5	180403	191608	237768
Ferrochelatase, mitochondrial OS=Homo sapiens OX=9606 GN=FECH PE=1 SV=2	6	2	4	47.8	FECH	211272	123267	35628.1	323726	221127	90147
FH1/FH2 domain-containing protein 1 OS=Homo sapiens OX=9606 GN=FHOD1 PE=1 SV=3	5	3	4	126.5	FHOD1	32005.4					6927.08
Focadhesin OS=Homo sapiens OX=9606 GN=FOCAD PE=1 SV=1	1	2	4	199.9	FOCAD	29043.2	35452	3108.09	55581.4	42606.6	37516.5
Formin-binding protein 4 OS=Homo sapiens OX=9606 GN=FNBP4 PE=1 SV=3	3	1	4	110.2	FNBP4	30070.1	7699.18		16854.5	16609.5	27816.8
Formin-like protein 3 OS=Homo sapiens OX=9606 GN=FMNL3 PE=1 SV=3	2	2	4	117.1	FMNL3	95331.8	65411.1	30283.9	130225	99233.2	120273
Fructose-bisphosphate aldolase OS=Homo sapiens OX=9606 GN=ALDOC PE=1 SV=1	7	1	4	36.3		38862.9			7921.89	7405.48
G2/mitotic-specific cyclin-B1 OS=Homo sapiens OX=9606 GN=CCNB1 PE=1 SV=1	7	2	4	48.3	CCNB1	199696	46094.9		59721.1	64049.9	70173.7
Galactosylgalactosylxylosylprotein 3-beta-glucuronosyltransferase OS=Homo sapiens OX=9606 GN=B3GAT3 PE=1 SV=1	6	2	4	34.9	B3GAT3	148710	83633	34423.4	109453	98934.4	145503
General transcription factor TFIIB (Fragment) OS=Homo sapiens OX=9606 GN=GTF2B PE=1 SV=1	6	1	4	25	GTF2B	144285		10707.9	56041.2	32701.2	28952.7
General vesicular transport factor p115 OS=Homo sapiens OX=9606 GN=USO1 PE=1 SV=2	2	1	4	107.8	USO1	58560.1		18019.6	31343.8	23292.1
Glutaminase OS=Homo sapiens OX=9606 GN=GLS PE=1 SV=1	14	2	4	18.6		21234.6		9755.9	41412.3	58127.2	22794.7
Glutamine synthetase OS=Homo sapiens OX=9606 GN=GLUL PE=1 SV=4	8	3	4	42	GLUL	1.436e+06			148218	12123.6
Glutathione reductase, mitochondrial OS=Homo sapiens OX=9606 GN=GSR PE=1 SV=2	4	2	4	56.2	GSR	153026	53046.7	32667.4	148731	86237.2	77653.2
Glycerol-3-phosphate dehydrogenase, mitochondrial OS=Homo sapiens OX=9606 GN=GPD2 PE=1 SV=3	5	3	4	80.8	GPD2	74231.1	17517.5	30380.9	76265.5	49542.9	32178.5
Golgi apparatus protein 1 OS=Homo sapiens OX=9606 GN=GLG1 PE=1 SV=2	2	3	4	134.5	GLG1	246534	64490.3	30033.1	95185	65048.2	44856.3
Golgi reassembly-stacking protein 2 OS=Homo sapiens OX=9606 GN=GORASP2 PE=1 SV=3	7	2	4	47.1	GORASP2	63430.2	47324.5	25450.3	55109.6	43528.5	40929.4
HAUS augmin-like complex subunit 6 OS=Homo sapiens OX=9606 GN=HAUS6 PE=1 SV=1	3	2	4	91.1	HAUS6	31662.1	31470	15256.1	76070.1	47974.2	43063.3
HEAT repeat-containing protein 1 OS=Homo sapiens OX=9606 GN=HEATR1 PE=1 SV=1	2	3	4	233.1	HEATR1	79544.3	80321.7	24210.3	114009	51236.3	35028.6
HIG1 domain-containing protein OS=Homo sapiens OX=9606 PE=4 SV=1	23	1	4	8.8		171892	11316.4	18777.8	103878	43863.9	25212.6
Histone acetyltransferase type B catalytic subunit OS=Homo sapiens OX=9606 GN=HAT1 PE=1 SV=1	7	2	4	49.5	HAT1	136476	10561.7	9837.63	48910.3	51827.9	37230.1
Inactive tyrosine-protein kinase 7 OS=Homo sapiens OX=9606 GN=PTK7 PE=1 SV=1	3	1	4	50.4	PTK7	65583.1	57487.6	41535.5	104594	108166	137808
Interferon-inducible double-stranded RNA-dependent protein kinase activator A OS=Homo sapiens OX=9606 GN=PRKRA PE=1 SV=1	11	1	4	10.4		393068	163416	74905.4	372282	334597	434553
Isoleucine--tRNA ligase, mitochondrial OS=Homo sapiens OX=9606 GN=IARS2 PE=1 SV=2	4	4	4	113.7	IARS2	445711	9467.53	40452.6	156582	107012	121372
Kelch-like protein 22 OS=Homo sapiens OX=9606 GN=KLHL22 PE=1 SV=2	3	1	4	71.6	KLHL22	64798.2	36768.8	16169	96928.9	44130.6	21253.4
Kinesin light chain 4 OS=Homo sapiens OX=9606 GN=KLC4 PE=1 SV=3	6	2	4	68.6	KLC4	32844.7	9027.74	6762.43	15233.9
Kinesin-like protein KIF2A OS=Homo sapiens OX=9606 GN=KIF2A PE=4 SV=1	5	3	4	67.1		270903	106731	53506.5	234924	228362	197473
Large neutral amino acids transporter small subunit 1 OS=Homo sapiens OX=9606 GN=SLC7A5 PE=1 SV=2	4	1	4	55	SLC7A5	89790.6	28382.6	43718.4	105210	60603.4	35552.8
Leucine-rich repeat and calponin homology domain-containing protein 1 OS=Homo sapiens OX=9606 GN=LRCH1 PE=1 SV=3	4	2	4	80.8	LRCH1	111467	57442.5	32547.8	111682	109386	75099.9
Leucine-rich repeat and calponin homology domain-containing protein 2 OS=Homo sapiens OX=9606 GN=LRCH2 PE=1 SV=2	4	2	4	84.5	LRCH2	80389.8	61812.2	34943.5	76561.4	72536.5	49265.7
LIM zinc-binding domain-containing protein OS=Homo sapiens OX=9606 PE=4 SV=1	16	1	4	14.4		16643.3	19845.9		12799.5	15780.1	15204.5
Long-chain fatty acid transport protein 1 OS=Homo sapiens OX=9606 GN=SLC27A1 PE=1 SV=1	3	2	4	71.1	SLC27A1	160904	169730	37132.8	81580.4	79700.5	118261
Luc7-like protein 3 OS=Homo sapiens OX=9606 GN=LUC7L3 PE=1 SV=2	7	2	4	51.4	LUC7L3	273516	16280.3		61754.9	36972.2	10959.2
Lysine-specific demethylase 3A OS=Homo sapiens OX=9606 GN=KDM3A PE=1 SV=4	4	4	4	147.2	KDM3A	122466	37430.6	5547.81	12911.9		12822.9
Lysophospholipid acyltransferase 7 OS=Homo sapiens OX=9606 GN=MBOAT7 PE=1 SV=2	6	2	4	52.7	MBOAT7	73393.5	12817.7	21545	42674.5	39455.5	31959.3
Major centromere autoantigen B OS=Homo sapiens OX=9606 GN=CENPB PE=1 SV=2	2	1	4	65.1	CENPB		17869.1	15289.2	41620.3	35683	34817.4
Mannose-1-phosphate guanyltransferase beta OS=Homo sapiens OX=9606 GN=GMPPB PE=1 SV=2	8	2	4	39.8	GMPPB	111006	48883.5	42642.2	98874.1	77315.1	74060.4
Matrix metalloproteinase-14 OS=Homo sapiens OX=9606 GN=MMP14 PE=1 SV=3	4	2	4	65.9	MMP14	93721.6	53861.2	32477.7	122385	125776	112169
Mediator of RNA polymerase II transcription subunit 12 OS=Homo sapiens OX=9606 GN=MED12 PE=1 SV=4	1	2	4	242.9	MED12	42271.4	14697.2	8034.47	30525.7	16267.9	8688.38
Medium-chain specific acyl-CoA dehydrogenase, mitochondrial OS=Homo sapiens OX=9606 GN=ACADM PE=1 SV=1	8	3	4	50.2	ACADM	160172	16324.4	5503.54	30269	30521.4	37834.5
Membrane-associated progesterone receptor component 1 OS=Homo sapiens OX=9606 GN=PGRMC1 PE=1 SV=3	4	1	4	21.7	PGRMC1	113073	82276.3	58708	177714	147247	145563
Methionine adenosyltransferase 2 subunit beta OS=Homo sapiens OX=9606 GN=MAT2B PE=1 SV=1	10	3	4	37.5	MAT2B	262101	50586.6	16994.2	71766.2	45843.5	61344.6
MICOS complex subunit MIC13 OS=Homo sapiens OX=9606 GN=MICOS13 PE=1 SV=1	14	1	4	15.4	C19orf70		18532.7		29670.3	29048.3	28423.1
Mitochondrial import inner membrane translocase subunit Tim29 OS=Homo sapiens OX=9606 GN=TIMM29 PE=1 SV=2	10	2	4	29.2	C19orf52; TIMM29	50116	40386.7		43828.9	45366.5	155892
Mitochondrial import receptor subunit TOM70 OS=Homo sapiens OX=9606 GN=TOMM70 PE=1 SV=1	6	1	4	67.4	TOMM70A; TOMM70	333435	72510.8	53275.3	133675	136601	156657
Mitochondrial mRNA pseudouridine synthase RPUSD3 OS=Homo sapiens OX=9606 GN=RPUSD3 PE=1 SV=3	7	2	4	38.4	RPUSD3	38573.5	25311.6	11775	49069.8	47653.4	37973.7
Mitogen-activated protein kinase-binding protein 1 OS=Homo sapiens OX=9606 GN=MAPKBP1 PE=1 SV=4	1	1	4	163.7	MAPKBP1	9720.16			17748.7	12024.9	10967.5
Mitotic spindle assembly checkpoint protein MAD2A OS=Homo sapiens OX=9606 GN=MAD2L1 PE=1 SV=1	3	1	4	23.5	MAD2L1	132251	110256	63402.4	143543	120542	118675
Muscleblind-like 2 (Drosophila), isoform CRA_b OS=Homo sapiens OX=9606 GN=MBNL2 PE=1 SV=1	8	2	4	28.1	MBNL2	71270.8	24237.4	33632.5	100071	90196.4	74704.5
Myosin regulatory light chain 12B OS=Homo sapiens OX=9606 GN=MYL12B PE=1 SV=2	12	2	4	19.8	MYL12B; MYL12A	141915	99988.5	40304.5	205494	151614	106795
Myotrophin OS=Homo sapiens OX=9606 GN=MTPN PE=1 SV=2	14	1	4	12.9	LUZP6; MTPN	921666	23612.9	8657.22	61345.7	43144.7	44810.5
Nitric oxide synthase-interacting protein OS=Homo sapiens OX=9606 GN=NOSIP PE=1 SV=1	11	2	4	33.2	NOSIP	140184	65369.1	40279.8	121240	72577.9	72203.6
NPC intracellular cholesterol transporter 1 OS=Homo sapiens OX=9606 GN=NPC1 PE=1 SV=2	1	1	4	142.1	NPC1	144225	19424.6	10566.7	70958	44193.4	32897.6
Nuclear distribution protein nudE homolog 1 (Fragment) OS=Homo sapiens OX=9606 GN=NDE1 PE=1 SV=1	17	2	4	18.6		82525.6	123176	23142.9	77872.4	68045.2	51013.7
Nuclear factor 1 C-type OS=Homo sapiens OX=9606 GN=NFIC PE=1 SV=2	4	2	4	55.6	NFIC	132133	128062	96218.5	337355	279214	238977
Nuclear fragile X mental retardation-interacting protein 2 OS=Homo sapiens OX=9606 GN=NUFIP2 PE=1 SV=1	3	2	4	76.1	NUFIP2	112609	63048.4	15957.9	115326	85566.8	47387.1
Nucleolar and spindle-associated protein 1 OS=Homo sapiens OX=9606 GN=NUSAP1 PE=1 SV=1	2	1	4	49.4	NUSAP1	28583.2	22712.7	10703.2	65658.1	64106.8	61393.1
Nucleoporin p54 OS=Homo sapiens OX=9606 GN=NUP54 PE=1 SV=2	7	2	4	55.4	NUP54	49662.5	15055.4	14986	29543.6	25883.3	19243.1
Nucleosome assembly protein 1-like 1 OS=Homo sapiens OX=9606 GN=NAP1L1 PE=1 SV=1	5	1	4	38		135671	30570.7		21337.1	28115.4	62554.9
OCIA domain-containing protein 1 OS=Homo sapiens OX=9606 GN=OCIAD1 PE=1 SV=1	15	2	4	15.4	OCIAD1	173680	56292.7	54287.5	1.0206e+06	1.1529e+06	2.38376e+06
Paraspeckle component 1 (Fragment) OS=Homo sapiens OX=9606 GN=PSPC1 PE=1 SV=1	8	2	4	27.3	PSPC1	114358	81726.2	33304.9	91853.5	51942.8	40078.8
PCI domain-containing protein 2 OS=Homo sapiens OX=9606 GN=PCID2 PE=1 SV=2	3	1	4	46	PCID2	133762	131732	38353	183590	122116	115717
PDZ and LIM domain protein 4 OS=Homo sapiens OX=9606 GN=PDLIM4 PE=1 SV=2	8	2	4	35.4	PDLIM4	175775	153987	60184.4	203129	164579	200116
PDZ domain-containing protein 11 OS=Homo sapiens OX=9606 GN=PDZD11 PE=1 SV=2	7	1	4	16.1	PDZD11	179893	181729	73059.9	6.96057e+06	6.16131e+06	6584923
Periaxin (Fragment) OS=Homo sapiens OX=9606 GN=PRX PE=4 SV=1	9	1	4	10.8		2.38856e+06	2.46637e+06	1.72017e+06	1.18366e+06	1158833	1.44688e+06
Phosphatidylinositol 4-kinase alpha OS=Homo sapiens OX=9606 GN=PI4KA PE=1 SV=4	1	2	4	236.7	PI4KA	78936.2	14707.2		40556.1	28627.4	16643.2
Phosphatidylinositol 4-phosphate 3-kinase C2 domain-containing subunit alpha OS=Homo sapiens OX=9606 GN=PIK3C2A PE=1 SV=2	2	2	4	190.6	PIK3C2A	68623	45393.6	23859.5	37513	7255.21
Phosphofurin acidic cluster sorting protein 1 OS=Homo sapiens OX=9606 GN=PACS1 PE=1 SV=1	6	2	4	54.4	PACS1	29552.1	14221.2	21357.7	46983.6	37305.9	25179.7
Pleckstrin homology domain-containing family H member 3 OS=Homo sapiens OX=9606 GN=PLEKHH3 PE=1 SV=1	4	2	4	84.8	PLEKHH3	41847.1	28231.5	9236.32	38961.6	24899.6	45427.7
Plexin domain-containing protein 2 OS=Homo sapiens OX=9606 GN=PLXDC2 PE=1 SV=1	2	1	4	59.5	PLXDC2	88667.1	113599	61891.1	107406	101332	109525
Poliovirus receptor OS=Homo sapiens OX=9606 GN=PVR PE=1 SV=1	3	1	4	42.9	PVR	65014.6	49550	31212.8	68390.2	69932.8	111732
Poly(A) RNA polymerase GLD2 OS=Homo sapiens OX=9606 GN=TENT2 PE=1 SV=1	2	1	4	56	PAPD4	91921.3	101084	28213.6	80269.7	105496	145502
PRA1 family protein 3 OS=Homo sapiens OX=9606 GN=ARL6IP5 PE=1 SV=1	4	1	4	21.6	ARL6IP5	150594	134546	73375.8	327815	185154	240143
pre-mRNA 3' end processing protein WDR33 OS=Homo sapiens OX=9606 GN=WDR33 PE=1 SV=2	4	3	4	145.8	WDR33	85015.2	59838.3	24572.4	159786	138336	151986
Pre-mRNA cleavage complex 2 protein Pcf11 OS=Homo sapiens OX=9606 GN=PCF11 PE=1 SV=3	1	2	4	172.9	PCF11	33046.9	16592.3	3976.85	365074	431127	360643
Probable ATP-dependent RNA helicase DDX47 OS=Homo sapiens OX=9606 GN=DDX47 PE=1 SV=1	8	3	4	50.6	DDX47	177123	63597.5	40187.1	268440	265080	245147
Probable ATP-dependent RNA helicase DDX49 OS=Homo sapiens OX=9606 GN=DDX49 PE=1 SV=1	2	1	4	54.2	DDX49	80348.4	46864.6	26211.4	68765.6	64935.6	64298.1
Probable ATP-dependent RNA helicase DDX56 OS=Homo sapiens OX=9606 GN=DDX56 PE=1 SV=1	3	1	4	61.6	DDX56	55760.4	6840.84	10556.4	54750.3	47629.9	24026.2
Probable ATP-dependent RNA helicase DHX40 (Fragment) OS=Homo sapiens OX=9606 GN=DHX40 PE=1 SV=1	6	1	4	29.9		47724.9	20252.9	13923.2	34964	41930.4	25161.6
Probable E3 ubiquitin-protein ligase HERC4 OS=Homo sapiens OX=9606 GN=HERC4 PE=1 SV=1	1	1	4	118.5	HERC4	96379.1		15477.8	43203.5	35826.9	43150.8
Prolactin regulatory element-binding protein OS=Homo sapiens OX=9606 GN=PREB PE=1 SV=2	14	3	4	45.4	PREB	247609	112128	34957.4	150881	146582	263386
Prolyl 3-hydroxylase 3 OS=Homo sapiens OX=9606 GN=P3H3 PE=1 SV=1	1	1	4	81.8	LEPREL2; P3H3	92582.3	85211.9	46632.3	120695	97185.4	96064.2
Prostaglandin E synthase 2 (Fragment) OS=Homo sapiens OX=9606 GN=PTGES2 PE=1 SV=1	4	1	4	29.1	PTGES2	48198.2	76661.6	23349.6	105175	76675.1	100177
Proteasome subunit alpha type (Fragment) OS=Homo sapiens OX=9606 GN=PSMA4 PE=1 SV=1	14	3	4	26.4		391215	28471.5		29386.5	17118.3	22472.6
Proteasome subunit alpha type OS=Homo sapiens OX=9606 GN=PSMA6 PE=1 SV=1	12	1	4	11.6		157698	187356	96524.6	251972	154282	208135
Protein argonaute-1 OS=Homo sapiens OX=9606 GN=AGO1 PE=1 SV=3	4	3	4	97.2	AGO1; EIF2C1	37022.7	22181.8	6315.62	23302.2	42494.4	72599.4
Protein canopy homolog 2 (Fragment) OS=Homo sapiens OX=9606 GN=CNPY2 PE=1 SV=1	16	1	4	11.7		54014.2	7476.03	10578.1	23324.8	18865	28047.9
Protein disulfide-isomerase A4 OS=Homo sapiens OX=9606 GN=PDIA4 PE=1 SV=2	5	3	4	72.9	PDIA4	363305	176498	65906.5	88068.1	149154	87414.8
Protein FAM168A OS=Homo sapiens OX=9606 GN=FAM168A PE=1 SV=2	11	2	4	26.2	FAM168A	86672.7	72293.2	16072.5	70193.1	60018.8	111162
Protein kinase C beta type OS=Homo sapiens OX=9606 GN=PRKCB PE=1 SV=4	7	3	4	76.8	PRKCB	282084					8842.16
Protein mono-ADP-ribosyltransferase PARP14 OS=Homo sapiens OX=9606 GN=PARP14 PE=1 SV=3	3	3	4	202.7	PARP14	110463	26058.1		39766.7	41284.2	87808.4
Protein phosphatase 1 regulatory subunit 12C (Fragment) OS=Homo sapiens OX=9606 GN=PPP1R12C PE=1 SV=1	3	1	4	80.3			8240.82	8796.42	27358	20135.9	11321.5
Protein SCO1 homolog, mitochondrial OS=Homo sapiens OX=9606 GN=SCO1 PE=1 SV=1	3	1	4	30.2		256673	469167	75263.3	534818	341789	395115
Protein transport protein Sec31A OS=Homo sapiens OX=9606 GN=SEC31A PE=1 SV=1	4	3	4	105.6	SEC31A	185817	46280.4	23885.6	101592	86946.5	95744.5
Protein WWC3 OS=Homo sapiens OX=9606 GN=WWC3 PE=1 SV=3	2	2	4	122.6	WWC3	43015	32926.9	16294.8	44047.6	53324.5	50883.5
Protein YIPF5 OS=Homo sapiens OX=9606 GN=YIPF5 PE=1 SV=1	5	1	4	28	YIPF5	62947.6	23789.1	15073.5	49726.3	50287.1	68245.8
Protein-tyrosine-phosphatase (Fragment) OS=Homo sapiens OX=9606 GN=PTPRF PE=1 SV=1	1	1	4	150.4		14315	9643.81	2892.03	16968.4	12080.5	17164.9
Putative segment polarity protein dishevelled homolog DVL1P1 OS=Homo sapiens OX=9606 GN=DVL1P1 PE=5 SV=1	4	2	4	73.2	DVL1	34526.8	49276.7	15904.8	63869.1	57387.2	71375.9
Rac GTPase-activating protein 1 OS=Homo sapiens OX=9606 GN=RACGAP1 PE=1 SV=1	3	1	4	71	RACGAP1	140116	41638.8	62508.2	161273	94969	64442.8
Ral GTPase-activating protein subunit beta OS=Homo sapiens OX=9606 GN=RALGAPB PE=1 SV=1	3	3	4	166.7	RALGAPB	22340.4			219014	174301	142415
Ras association domain-containing protein 8 OS=Homo sapiens OX=9606 GN=RASSF8 PE=1 SV=2	5	2	4	48.3	RASSF8	202329	93086.9	43602.3	126414	139529	130776
Ras suppressor protein 1 OS=Homo sapiens OX=9606 GN=RSU1 PE=1 SV=3	9	2	4	31.5	RSU1	71281.1	21934.7		41205.5	49331.9	49414.5
Ras-related protein Rab-10 OS=Homo sapiens OX=9606 GN=RAB10 PE=1 SV=1	15	3	4	22.5	RAB10	394522	171313	81475.8	289182	182886	253833
Ras-related protein Rab-18 OS=Homo sapiens OX=9606 GN=RAB18 PE=1 SV=1	9	2	4	23	RAB18	180584	119173	53344.3	155229	215999	195527
RBR-type E3 ubiquitin transferase (Fragment) OS=Homo sapiens OX=9606 GN=RNF31 PE=1 SV=1	5	3	4	102.3		163273	152555	42948.2	169150	162623	103853
Retinoblastoma-associated protein OS=Homo sapiens OX=9606 GN=RB1 PE=1 SV=1	1	1	4	105.4		54468.6	51544.5	6243.51	42810.2	37695	71993.9
Rho GTPase-activating protein 32 OS=Homo sapiens OX=9606 GN=ARHGAP32 PE=1 SV=1	4	4	4	230.4	ARHGAP32	139186	90277.4	42858.9	153992	126433	118228
Rho GTPase-activating protein 39 OS=Homo sapiens OX=9606 GN=ARHGAP39 PE=1 SV=2	2	2	4	121.2	ARHGAP39	72458	50727.2	32544.1	81795.7	85754.3	75182.6
Rho guanine nucleotide exchange factor 1 OS=Homo sapiens OX=9606 GN=ARHGEF1 PE=1 SV=2	4	3	4	102.4	ARHGEF1	148103	10388.7	14093.1	55941.4	38798.8	10584.3
Rhotekin OS=Homo sapiens OX=9606 GN=RTKN PE=1 SV=2	4	1	4	62.6	RTKN	54515.8	43936.2	14448.3	34098.9	32683	26391.2
RING-type E3 ubiquitin transferase (Fragment) OS=Homo sapiens OX=9606 GN=RNF126 PE=1 SV=7	4	1	4	30.8		625416	59212	54882.3	81207.7	68879.7	53731.1
RNA polymerase-associated protein RTF1 homolog OS=Homo sapiens OX=9606 GN=RTF1 PE=1 SV=4	3	2	4	80.3	RTF1	162629			146901	110565	76411
RNA-binding protein 33 OS=Homo sapiens OX=9606 GN=RBM33 PE=1 SV=3	2	2	4	129.9	RBM33	119964	75194.1	28378.3	91383.6	66057.2	54510.5
Sacsin OS=Homo sapiens OX=9606 GN=SACS PE=1 SV=2	1	3	4	520.8	SACS	29310.3	81144.6	9321.54	39607.2	35614.2	37257.7
Scaffold attachment factor B1 OS=Homo sapiens OX=9606 GN=SAFB PE=1 SV=4	4	2	4	102.6	SAFB	58710.6		2583.36	10625.5	8455.26	4457.67
Scaffold attachment factor B2 OS=Homo sapiens OX=9606 GN=SAFB2 PE=1 SV=1	4	2	4	107.4	SAFB2	177506	186635	57474.8	163702	145682	181484
Selenoprotein H (Fragment) OS=Homo sapiens OX=9606 GN=SELENOH PE=1 SV=1	10	1	4	10.4		100906	45563.6	5127.85	74237.9	33626.5	28535.7
Septin-8 OS=Homo sapiens OX=9606 GN=SEPTIN8 PE=1 SV=1	7	2	4	49.3		12833.2	10692.9			8643.85	22469.1
Serine/arginine repetitive matrix protein 1 OS=Homo sapiens OX=9606 GN=SRRM1 PE=1 SV=2	7	3	4	102.3	SRRM1	649409			42150.2
Serine/threonine-protein kinase LATS1 OS=Homo sapiens OX=9606 GN=LATS1 PE=1 SV=1	2	1	4	126.8	LATS1	118919	109183	58780.8	234690	153199	139236
SH3 domain-containing YSC84-like protein 1 OS=Homo sapiens OX=9606 GN=SH3YL1 PE=1 SV=1	3	1	4	37.1	SH3YL1	2.50225e+06	2.48554e+06	269846	1.65376e+06	3033791	2.25361e+06
S-phase kinase-associated protein 1 OS=Homo sapiens OX=9606 GN=SKP1 PE=1 SV=1	12	2	4	18.7		301339	418258	63426	463678	312401	304165
Sphingosine-1-phosphate lyase 1 (Fragment) OS=Homo sapiens OX=9606 GN=SGPL1 PE=1 SV=1	11	1	4	15		79301.2	37742.4	28087.5	145143	94889.6	71442.6
Splicing factor 3B subunit 4 OS=Homo sapiens OX=9606 GN=SF3B4 PE=1 SV=1	3	1	4	44.4	SF3B4	142705	34879.6	4719.32	113086	61220.5	24974.4
SR-related and CTD-associated factor 8 OS=Homo sapiens OX=9606 GN=SCAF8 PE=1 SV=1	2	2	4	140.4	SCAF8	242635	253423	75349.1	397973	281356	314474
Sterile alpha motif domain-containing protein 10 OS=Homo sapiens OX=9606 GN=SAMD10 PE=2 SV=1	17	3	4	22.8	SAMD10	37647.2	57687.1	22266.3	88283.4	51670.1	54209.8
Stomatin OS=Homo sapiens OX=9606 GN=STOM PE=1 SV=1	11	1	4	18.7	STOM	17257.8	5768.67	5775.09	16414.8
Structural maintenance of chromosomes flexible hinge domain-containing protein 1 OS=Homo sapiens OX=9606 GN=SMCHD1 PE=1 SV=2	2	2	4	226.2	SMCHD1	80324.9	5339.01	4202.45	12141.3	27591.7	20570.9
SWI/SNF-related matrix-associated actin-dependent regulator of chromatin subfamily B member 1 OS=Homo sapiens OX=9606 GN=SMARCB1 PE=1 SV=1	3	1	4	45	SMARCB1	154461	78470.7	14845	93004.8	85947.4	95528.8
Target of EGR1 protein 1 OS=Homo sapiens OX=9606 GN=TOE1 PE=1 SV=1	12	3	4	56.5	TOE1	490513		12274.7	88288.6	53056	39356.3
Testin OS=Homo sapiens OX=9606 GN=TES PE=1 SV=1	10	4	4	48	TES	276933	57373.6	29765.5	133396	82391.3	64311.5
Threonylcarbamoyladenosine tRNA methylthiotransferase OS=Homo sapiens OX=9606 GN=CDKAL1 PE=1 SV=1	2	1	4	65.1	CDKAL1	13483.8	17003.8	13178.5	27166.3	15553.9	24853.5
Thymidylate kinase OS=Homo sapiens OX=9606 GN=DTYMK PE=1 SV=4	6	1	4	23.8	DTYMK	25466.3	28961.4		18370.7	16442.1	43397.2
TRAF family member-associated NF-kappa-B activator OS=Homo sapiens OX=9606 GN=TANK PE=1 SV=2	3	1	4	47.8	TANK	84235.9	85702.7	49152.5	99293.3	79868.1	87877.3
TRAF2 and NCK-interacting protein kinase OS=Homo sapiens OX=9606 GN=TNIK PE=1 SV=1	2	2	4	154.8	TNIK	150544	69395.2	31702.6	197877	106936	64905
Trafficking protein particle complex subunit 12 OS=Homo sapiens OX=9606 GN=TRAPPC12 PE=1 SV=3	5	3	4	79.3	TRAPPC12	179862	110696	30171.1	154856	125410	87802.3
Transcription cofactor vestigial-like protein 3 OS=Homo sapiens OX=9606 GN=VGLL3 PE=1 SV=1	5	1	4	36	VGLL3	168171	83940.7	19152.2	107127	124811	206330
Transcription elongation factor A protein 1 OS=Homo sapiens OX=9606 GN=TCEA1 PE=1 SV=1	15	4	4	33.9		358960			11598.5	5353.71
Transcription initiation factor TFIID subunit 10 OS=Homo sapiens OX=9606 GN=TAF10 PE=1 SV=1	11	1	4	21.7	TAF10		10885.5	7855.97	16850.4	18307.2	16878.9
Transcription termination factor 2 OS=Homo sapiens OX=9606 GN=TTF2 PE=1 SV=2	1	1	4	129.5	TTF2	61840.1	32737.9	12543.9	64010.8	60154.1	55808.1
Transforming protein RhoA OS=Homo sapiens OX=9606 GN=RHOA PE=1 SV=1	16	3	4	21.8	RHOA	106529	201564	27136.4	355720	72993.5	101210
Translation initiation factor eIF-2B subunit epsilon OS=Homo sapiens OX=9606 GN=EIF2B5 PE=1 SV=3	7	4	4	80.3	EIF2B5	112486	37918.8	16622.7	68197.2	61861.1	128788
Transmembrane emp24 domain-containing protein 9 OS=Homo sapiens OX=9606 GN=TMED9 PE=1 SV=2	5	1	4	27.3	TMED9	211074	119071	22418.3	203046	66780.2	53032.1
Transmembrane protein 43 OS=Homo sapiens OX=9606 GN=TMEM43 PE=1 SV=1	6	2	4	44.8	TMEM43	46870.9	22219.3	28384.4	97508	58438.5	9213.87
tRNA (adenine(58)-N(1))-methyltransferase non-catalytic subunit TRM6 OS=Homo sapiens OX=9606 GN=TRMT6 PE=1 SV=1	2	1	4	55.8	TRMT6			15189.5	102907	99274.1	84103.5
Tubulin--tyrosine ligase-like protein 12 OS=Homo sapiens OX=9606 GN=TTLL12 PE=1 SV=2	10	4	4	74.4	TTLL12	505292	6927.6		4413.85	3980.87	20336.5
Tumor necrosis factor receptor type 1-associated DEATH domain protein OS=Homo sapiens OX=9606 GN=TRADD PE=1 SV=2	10	2	4	34.2	TRADD	74082.4	53461.3	23097.2	73658.1	62290.1	72565.9
Tumor suppressor candidate 3 OS=Homo sapiens OX=9606 GN=TUSC3 PE=1 SV=1	3	1	4	35.7	TUSC3	62270.3	59426.5	19598.7	154241	154287	226847
Tyrosine-protein kinase JAK2 OS=Homo sapiens OX=9606 GN=JAK2 PE=1 SV=2	2	2	4	130.6	JAK2	35179.4	29095.7	4697.35	21168	23346.1	37649.8
Tyrosine-protein phosphatase non-receptor type OS=Homo sapiens OX=9606 GN=PTPN1 PE=1 SV=1	4	1	4	41.2	PTPN1	95095.8	15805.8	15296.5	56228.6	59080.6	14568.4
Tyrosine--tRNA ligase, cytoplasmic OS=Homo sapiens OX=9606 GN=YARS1 PE=1 SV=4	8	4	4	59.1	YARS	677703	41309.5	24908.1	229073	186561	159548
U2 snRNP-associated SURP motif-containing protein OS=Homo sapiens OX=9606 GN=U2SURP PE=1 SV=2	4	3	4	118.2	U2SURP	157399	44542	3060.12	103168	83841.1	66252.2
Ubiquitin carboxyl-terminal hydrolase 15 OS=Homo sapiens OX=9606 GN=USP15 PE=1 SV=3	4	4	4	112.3	USP15	1.41218e+06	15016.5	3723.12	15615.5	11016.9	28648.1
Ubiquitin carboxyl-terminal hydrolase isozyme L5 OS=Homo sapiens OX=9606 GN=UCHL5 PE=1 SV=3	9	3	4	37.6	UCHL5	99176.5	42498.1	25154.2	71355.4	53798.1	64362.1
Uridine phosphorylase 1 (Fragment) OS=Homo sapiens OX=9606 GN=UPP1 PE=1 SV=1	5	1	4	15.8		151078	177014	93383.6	289490	277205	340998
Vacuolar protein sorting-associated protein 11 homolog OS=Homo sapiens OX=9606 GN=VPS11 PE=1 SV=1	2	2	4	107.8	VPS11	244596	58889.5	13257.6	131260	47772.8	73088.7
Vacuolar protein sorting-associated protein 16 homolog OS=Homo sapiens OX=9606 GN=VPS16 PE=1 SV=2	2	1	4	94.6	VPS16	91536.1	24865.3	12753.1	62287.4	61647.3	55852
Vacuolar protein sorting-associated protein 37B OS=Homo sapiens OX=9606 GN=VPS37B PE=1 SV=1	9	1	4	31.3	VPS37B	30776.4	34103.5		29610.8	21109.1	41736.2
Vasculin-like protein 1 OS=Homo sapiens OX=9606 GN=GPBP1L1 PE=1 SV=1	3	1	4	52.3	GPBP1L1	26288.2	10944.1	14074.7	32468.5	20130	8945.39
Very-long-chain 3-oxoacyl-CoA reductase OS=Homo sapiens OX=9606 GN=HSD17B12 PE=1 SV=2	9	2	4	34.3	HSD17B12	173500	49537.5	3516.23	57848.9	64337.4	179788
Vesicle-associated membrane protein 3 OS=Homo sapiens OX=9606 GN=VAMP3 PE=1 SV=3	16	1	4	11.3	VAMP3			8760.42	28925.6	25769.2
1-acyl-sn-glycerol-3-phosphate acyltransferase epsilon OS=Homo sapiens OX=9606 GN=AGPAT5 PE=1 SV=3	3	1	3	42	AGPAT5	61321.6	54256.3	20514	64991.9	54192.6	78531.8
28 kDa heat- and acid-stable phosphoprotein OS=Homo sapiens OX=9606 GN=PDAP1 PE=1 SV=1	22	3	3	20.6	PDAP1	220249				7527.46
28S ribosomal protein S11, mitochondrial OS=Homo sapiens OX=9606 GN=MRPS11 PE=1 SV=2	8	1	3	20.6	MRPS11	25285.7	24159.1	5479.41	47947.4	43691.3	39321
28S ribosomal protein S2, mitochondrial OS=Homo sapiens OX=9606 GN=MRPS2 PE=1 SV=1	3	1	3	33.2	MRPS2	98737.9	173924	24003.5	225855	144120	280563
28S ribosomal protein S28, mitochondrial OS=Homo sapiens OX=9606 GN=MRPS28 PE=1 SV=1	10	2	3	20.8	MRPS28	23866	5971.58		18669.6	40604.3	20616.3
2-oxoisovalerate dehydrogenase subunit alpha OS=Homo sapiens OX=9606 PE=3 SV=1	6	2	3	54.2		80983.4	54830.8		43110.5	21304.2	20995.2
39S ribosomal protein L16, mitochondrial OS=Homo sapiens OX=9606 GN=MRPL16 PE=1 SV=1	4	1	3	28.4	MRPL16	70100.5	97925.5	13216.6	76022.4	85388.7	220849
39S ribosomal protein L23, mitochondrial OS=Homo sapiens OX=9606 GN=MRPL23 PE=1 SV=1	10	1	3	17.8	MRPL23		8286.38		17167.3	26502	64403.4
39S ribosomal protein L39, mitochondrial (Fragment) OS=Homo sapiens OX=9606 GN=MRPL39 PE=1 SV=1	11	3	3	34		59241.4	6857.68	38044.7	105158	107669	122084
39S ribosomal protein L49, mitochondrial OS=Homo sapiens OX=9606 GN=MRPL49 PE=1 SV=1	8	1	3	19.2	MRPL49	60799.3	27513.7	17032.8	68839.8	56892.6	48500.2
3-methyladenine DNA glycosidase (Fragment) OS=Homo sapiens OX=9606 GN=MPG PE=1 SV=1	6	1	3	27.3	MPG	52318	19076.7	8355.39	46245.7	32769.7	27187.6
60 kDa SS-A/Ro ribonucleoprotein OS=Homo sapiens OX=9606 GN=RO60 PE=1 SV=2	4	2	3	60.6	TROVE2	195250		3943.63	19632.2	14416.6	40788.5
6-phosphofructo-2-kinase OS=Homo sapiens OX=9606 GN=PFKFB1 PE=1 SV=1	4	1	3	28.3	PFKFB1	113453	31864.1	19470.7	79390.8	67210.9	67057.8
7-dehydrocholesterol reductase OS=Homo sapiens OX=9606 GN=DHCR7 PE=1 SV=1	4	2	3	54.5	DHCR7	430583	445948	118760	418900	365603	557722
Aconitate hydratase, mitochondrial OS=Homo sapiens OX=9606 GN=ACO2 PE=1 SV=1	2	1	3	87.8	ACO2	161370	6585.1	10317.8	31135.8	17442.8	15066.2
Activated RNA polymerase II transcriptional coactivator p15 OS=Homo sapiens OX=9606 GN=SUB1 PE=1 SV=3	26	3	3	14.4	SUB1	476604	17604.6	13768.6	37679.7	18633.2	24438.8
Acyl-coenzyme A synthetase ACSM3, mitochondrial OS=Homo sapiens OX=9606 GN=ACSM3 PE=1 SV=2	5	3	3	66.1	ACSM3	210109
Adenosine 3'-phospho 5'-phosphosulfate transporter 1 OS=Homo sapiens OX=9606 GN=SLC35B2 PE=1 SV=1	2	1	3	47.5	SLC35B2	152595	61769.9	60573.9	137718	82353.4	71935.8
ADP-ribosylation factor-binding protein GGA2 OS=Homo sapiens OX=9606 GN=GGA2 PE=1 SV=3	4	2	3	67.1	GGA2	150224	8879.17		8477.85	7155.4	10498.5
Alpha-parvin OS=Homo sapiens OX=9606 GN=PARVA PE=1 SV=1	4	2	3	42.2	PARVA	54981.5	44764	14884.4	51091.1	56512.4	79743
Aminoacyl tRNA synthase complex-interacting multifunctional protein 2 OS=Homo sapiens OX=9606 GN=AIMP2 PE=1 SV=2	4	1	3	35.3	AIMP2	62881.2	45576.4	40511.4	147310	107721	98358.6
Anamorsin OS=Homo sapiens OX=9606 GN=CIAPIN1 PE=1 SV=1	16	3	3	26.4		560661	4742.34		8988.13	5710.25
Angio-associated migratory cell protein (Fragment) OS=Homo sapiens OX=9606 GN=AAMP PE=1 SV=8	6	1	3	22		111829	52665				69997
Annexin A11 OS=Homo sapiens OX=9606 GN=ANXA11 PE=1 SV=1	4	2	3	54.4	ANXA11	131680	78544.4	47632.5	139195	141793	110248
Annexin A7 OS=Homo sapiens OX=9606 GN=ANXA7 PE=1 SV=3	2	1	3	52.7	ANXA7	149051	26382	31590.8		37313.2	33040.9
ARF GTPase-activating protein GIT2 (Fragment) OS=Homo sapiens OX=9606 GN=GIT2 PE=1 SV=1	3	2	3	71.5		99130.9	61848.6	48510.3	88332.2	70541.8	41308.5
Armadillo repeat-containing protein 10 OS=Homo sapiens OX=9606 GN=ARMC10 PE=1 SV=1	6	1	3	20.9	ARMC10	47888.3	18474.1	11439.7	44826.8	25689.4	39401.7
Armadillo repeat-containing protein 8 OS=Homo sapiens OX=9606 GN=ARMC8 PE=1 SV=2	2	1	3	75.5	ARMC8	27276	20502.8	7907.08	18898.7	22030.5	40095.4
Asparagine--tRNA ligase, cytoplasmic OS=Homo sapiens OX=9606 GN=NARS1 PE=1 SV=1	6	3	3	62.9	NARS	365555	33976.8	9621.16	37050.9	24859.8	49596.1
Aspartyl aminopeptidase OS=Homo sapiens OX=9606 GN=DNPEP PE=1 SV=1	6	2	3	52		105205	58088	53211.2	110667	107603	147514
ATP5MF-PTCD1 readthrough OS=Homo sapiens OX=9606 GN=ATP5MF-PTCD1 PE=4 SV=1	3	2	3	84.1	ATP5J2-PTCD1	61782.1	69400.2	58619.2	143385	176945	194380
Baculoviral IAP repeat-containing protein 2 OS=Homo sapiens OX=9606 GN=BIRC2 PE=1 SV=1	6	3	3	67.5		116481	32766.8	66536.7	123976	77296.3	40596.8
Beta-centractin OS=Homo sapiens OX=9606 GN=ACTR1B PE=1 SV=1	11	3	3	42.3	ACTR1B	492798	275541	144355	348248	297034	307826
Beta-galactosidase OS=Homo sapiens OX=9606 GN=GLB1 PE=1 SV=2	2	1	3	76	GLB1	18277.5				16716.5	19483
Bifunctional 3'-phosphoadenosine 5'-phosphosulfate synthase 2 OS=Homo sapiens OX=9606 GN=PAPSS2 PE=1 SV=2	3	1	3	69.5	PAPSS2				14548.5	27726.6	97126.4
BUB3-interacting and GLEBS motif-containing protein ZNF207 (Fragment) OS=Homo sapiens OX=9606 GN=ZNF207 PE=1 SV=2	7	1	3	21.3		64383.5	67734.7	20830.2	120537
Cactin OS=Homo sapiens OX=9606 GN=CACTIN PE=1 SV=3	2	1	3	88.6	CACTIN	55970.1	67692.3	16282.5	42657.2	28972.4	18285.3
Calcyclin-binding protein OS=Homo sapiens OX=9606 GN=CACYBP PE=1 SV=2	17	3	3	26.2	CACYBP	1.54592e+06			8367.95	5916.48
Carbonic anhydrase 9 OS=Homo sapiens OX=9606 GN=CA9 PE=1 SV=2	3	1	3	49.7	CA9	126016	78042.2	61075.1	24822.9		17649
Casein kinase II subunit alpha OS=Homo sapiens OX=9606 GN=CSNK2A1 PE=1 SV=1	6	2	3	45.3		257875	180694	40646.5	297899	238558	399218
Catalase OS=Homo sapiens OX=9606 GN=CAT PE=1 SV=3	2	1	3	59.7	CAT	62304.9	14141	18679.9	25063.4	21731.5	11905.8
CCR4-NOT transcription complex subunit 2 (Fragment) OS=Homo sapiens OX=9606 GN=CNOT2 PE=1 SV=1	5	1	3	33.2		165616	84277	64227.3	205391	118400	110055
CCR4-NOT transcription complex subunit 4 OS=Homo sapiens OX=9606 GN=CNOT4 PE=1 SV=3	3	2	3	63.5	CNOT4	54383.7	50592.5	28913.5	83649.9	60682.7	78638.8
Cdc42 effector protein 2 OS=Homo sapiens OX=9606 GN=CDC42EP2 PE=1 SV=1	13	1	3	22.5	CDC42EP2	79107.3	11724.1			7531.65	56590.3
Centrosomal protein of 89 kDa OS=Homo sapiens OX=9606 GN=CEP89 PE=1 SV=1	4	1	3	47.7		20731.8	20694.1		10647.5	8508.8	14075.8
Chromobox protein homolog 5 OS=Homo sapiens OX=9606 GN=CBX5 PE=1 SV=1	10	2	3	22.2	CBX5	288122	98787.2	29294.6	135336	88699.5	115690
Cilia- and flagella-associated protein 20 OS=Homo sapiens OX=9606 GN=CFAP20 PE=1 SV=1	4	1	3	22.8	C16orf80; CFAP20	91077.6	113576	22907.6	187883	145691	179661
Cilia- and flagella-associated protein 97 OS=Homo sapiens OX=9606 GN=CFAP97 PE=1 SV=2	3	2	3	59.4	KIAA1430; CFAP97	61520	61351.3	25409	113118	96863.7	151968
CLIP-associating protein 2 OS=Homo sapiens OX=9606 GN=CLASP2 PE=1 SV=1	3	3	3	165.6	CLASP2	93080.2	24805.5	13602	30479.8	21747.6	27911.4
Coiled-coil domain-containing protein 124 OS=Homo sapiens OX=9606 GN=CCDC124 PE=1 SV=1	10	2	3	25.8	CCDC124	116341	7521.41	19877.4	72053.6	74035.6	70388.3
Coiled-coil-helix-coiled-coil-helix domain-containing protein 1 OS=Homo sapiens OX=9606 GN=CHCHD1 PE=1 SV=1	14	1	3	13.5	CHCHD1	29511.3	35466.7	3165.54	65700.1	41232.2	18087.3
Collagen and calcium-binding EGF domain-containing protein 1 OS=Homo sapiens OX=9606 GN=CCBE1 PE=1 SV=1	4	1	3	36.5		43154.5	51101.5	14244.3	75801.9	61125.5	59460.6
COMM domain-containing protein 2 OS=Homo sapiens OX=9606 GN=COMMD2 PE=1 SV=2	8	2	3	22.7	COMMD2	113677	119630	13795.7	77869.8	58604.1	82096.9
Consortin OS=Homo sapiens OX=9606 GN=CNST PE=1 SV=3	5	3	3	79.5	CNST	1.76362e+06	417948	161444	465244	682369	590036
[truncated: 1,522 more rows]

## Sheet: VolcanoData
			Volcano Plot Data displayed in Figure 5C
Molecule Name	# Peptides	# PSMs	Description	Gene Symbol	Fold Change	FDR-Adjusted Q-Value	Visible in Plot	Color in Plot		log2(FC)
P63010	46	555	AP-2 complex subunit beta OS=Homo sapiens OX=9606 GN=AP2B1 PE=1 SV=1	AP2B1	6.29824	0.00538415	TRUE	green		2.26888
Q10567	40	395	AP-1 complex subunit beta-1 OS=Homo sapiens OX=9606 GN=AP1B1 PE=1 SV=2	AP1B1	6.45603	0.0117675	TRUE	green		1.92932
O94973	33	413	AP-2 complex subunit alpha-2 OS=Homo sapiens OX=9606 GN=AP2A2 PE=1 SV=2	AP2A2	7.11478	0.0117675	TRUE	green		1.92932
A0A0G2JQM1	30	440	AP-2 complex subunit alpha-2 (Fragment) OS=Homo sapiens OX=9606 GN=AP2A2 PE=1 SV=1		10.8061	0.00538415	TRUE	green		2.26888
O95782	30	281	AP-2 complex subunit alpha-1 OS=Homo sapiens OX=9606 GN=AP2A1 PE=1 SV=3	AP2A1	6.2251	0.0116545	TRUE	green		1.93351
P08729	28	211	Keratin, type II cytoskeletal 7 OS=Homo sapiens OX=9606 GN=KRT7 PE=1 SV=5	KRT7	-9.28638	0.0117675	TRUE	green		1.92932
Q96CW1	23	207	AP-2 complex subunit mu OS=Homo sapiens OX=9606 GN=AP2M1 PE=1 SV=2	AP2M1	7.35958	0.0117675	TRUE	green		1.92932
Q2M2I8	21	83	AP2-associated protein kinase 1 OS=Homo sapiens OX=9606 GN=AAK1 PE=1 SV=3	AAK1	6.63153	0.00538415	TRUE	green		2.26888
P00533	15	73	Epidermal growth factor receptor OS=Homo sapiens OX=9606 GN=EGFR PE=1 SV=2	EGFR	5.0371	0.0117675	TRUE	green		1.92932
A0A096LP25	14	64	AP2-associated protein kinase 1 (Fragment) OS=Homo sapiens OX=9606 GN=AAK1 PE=1 SV=1		7.312	0.0202364	TRUE	green		1.69387
Q96D71	13	50	RalBP1-associated Eps domain-containing protein 1 OS=Homo sapiens OX=9606 GN=REPS1 PE=1 SV=3	REPS1	7.2701	0.0154364	TRUE	green		1.81145
Q0JRZ9	11	21	F-BAR domain only protein 2 OS=Homo sapiens OX=9606 GN=FCHO2 PE=1 SV=2	FCHO2	4.62679	0.0063149	TRUE	green		2.19963
Q8NFH8	8	19	RalBP1-associated Eps domain-containing protein 2 OS=Homo sapiens OX=9606 GN=REPS2 PE=1 SV=2	REPS2	4.75174	0.0123591	TRUE	green		1.90801
A0A1B0GUI1	7	15	Ral GTPase-activating protein subunit alpha-1 OS=Homo sapiens OX=9606 GN=RALGAPA1 PE=1 SV=1	RALGAPA1	3.56627	0.0117675	TRUE	green		1.92932
A0A1W2PRL5	5	31	Adaptin ear-binding coat-associated protein 1 OS=Homo sapiens OX=9606 GN=NECAP1 PE=1 SV=1	NECAP1	6.41787	0.0117675	TRUE	green		1.92932
M0R0N4	4	25	AP complex subunit sigma OS=Homo sapiens OX=9606 GN=AP2S1 PE=1 SV=1	AP2S1	8.90881	0.0451903	TRUE	green		1.34496
P49757	3	8	Protein numb homolog OS=Homo sapiens OX=9606 GN=NUMB PE=1 SV=2	NUMB	4.3554	0.0117675	TRUE	green		1.92932
O95218	3	5	Zinc finger Ran-binding domain-containing protein 2 OS=Homo sapiens OX=9606 GN=ZRANB2 PE=1 SV=2	ZRANB2	7.87225	0.0224225	TRUE	green		1.64932
P78386	2	6	Keratin, type II cuticular Hb5 OS=Homo sapiens OX=9606 GN=KRT85 PE=1 SV=1	KRT85	-9.87329	0.000689657	TRUE	green		3.16137
P08648	2	7	Integrin alpha-5 OS=Homo sapiens OX=9606 GN=ITGA5 PE=1 SV=2	ITGA5	2.77634	0.0452307	TRUE	green		1.34457
Q5EBL8	1	4	PDZ domain-containing protein 11 OS=Homo sapiens OX=9606 GN=PDZD11 PE=1 SV=2	PDZD11	4.90751	0.0117675	TRUE	green		1.92932
Q6P3X3	1	1	Tetratricopeptide repeat protein 27 OS=Homo sapiens OX=9606 GN=TTC27 PE=1 SV=1	TTC27	-2.19879	0.0117675	TRUE	green		1.92932
Q9NR19	1	1	Acetyl-coenzyme A synthetase, cytoplasmic OS=Homo sapiens OX=9606 GN=ACSS2 PE=1 SV=1	ACSS2	-2.21682	0.0117675	TRUE	green		1.92932
Q9NSI8	1	1	SAM domain-containing protein SAMSN-1 OS=Homo sapiens OX=9606 GN=SAMSN1 PE=1 SV=1	SAMSN1	-3.0324	0.0117675	TRUE	green		1.92932
A0AVT1	1	1	Ubiquitin-like modifier-activating enzyme 6 OS=Homo sapiens OX=9606 GN=UBA6 PE=1 SV=1	UBA6	-2.45448	0.0292067	TRUE	green		1.53452
Q8TD30	1	1	Alanine aminotransferase 2 OS=Homo sapiens OX=9606 GN=GPT2 PE=1 SV=1	GPT2	2.75977	0.0373949	TRUE	green		1.42719
C9JV50	1	2	Phosphatidylinositol-3-phosphatase SAC1 (Fragment) OS=Homo sapiens OX=9606 GN=SACM1L PE=1 SV=1		-0.601223	0.0292034	TRUE	blue		1.53457
Q15149	129	524	Plectin OS=Homo sapiens OX=9606 GN=PLEC PE=1 SV=3	PLEC	-1.26377	0.605189	TRUE			0.218109
P21333	68	308	Filamin-A OS=Homo sapiens OX=9606 GN=FLNA PE=1 SV=4	FLNA	-0.385496	0.637178	TRUE			0.195739
Q14315	66	268	Filamin-C OS=Homo sapiens OX=9606 GN=FLNC PE=1 SV=3	FLNC	-0.992566	0.27537	TRUE			0.560084
P78527	65	233	DNA-dependent protein kinase catalytic subunit OS=Homo sapiens OX=9606 GN=PRKDC PE=1 SV=3	PRKDC	-0.443847	0.857109	TRUE			0.066964
Q86VI3	47	260	Ras GTPase-activating-like protein IQGAP3 OS=Homo sapiens OX=9606 GN=IQGAP3 PE=1 SV=2	IQGAP3	-0.233848	0.846209	TRUE			0.0725223
P15924	45	156	Desmoplakin OS=Homo sapiens OX=9606 GN=DSP PE=1 SV=3	DSP	-1.29518	0.243318	TRUE			0.613826
A3KMH1	41	146	von Willebrand factor A domain-containing protein 8 OS=Homo sapiens OX=9606 GN=VWA8 PE=1 SV=2	VWA8	0.473746	0.665209	TRUE			0.177042
O75369	41	144	Filamin-B OS=Homo sapiens OX=9606 GN=FLNB PE=1 SV=2	FLNB	-0.206322	0.779643	TRUE			0.108104
P08670	36	212	Vimentin OS=Homo sapiens OX=9606 GN=VIM PE=1 SV=4	VIM	-0.491693	0.578407	TRUE			0.237766
P05787	36	546	Keratin, type II cytoskeletal 8 OS=Homo sapiens OX=9606 GN=KRT8 PE=1 SV=7	KRT8	-0.183212	0.918164	TRUE			0.03708
Q8WUF5	35	326	RelA-associated inhibitor OS=Homo sapiens OX=9606 GN=PPP1R13L PE=1 SV=4	PPP1R13L	-0.603015	0.410384	TRUE			0.38681
Q09666	35	92	Neuroblast differentiation-associated protein AHNAK OS=Homo sapiens OX=9606 GN=AHNAK PE=1 SV=2	AHNAK	-0.0848495	0.964526	TRUE			0.0156859
P11142	34	450	Heat shock cognate 71 kDa protein OS=Homo sapiens OX=9606 GN=HSPA8 PE=1 SV=1	HSPA8	-0.492068	0.460738	TRUE			0.336546
P35579	33	105	Myosin-9 OS=Homo sapiens OX=9606 GN=MYH9 PE=1 SV=4	MYH9	-0.869733	0.331843	TRUE			0.479067
P42566	32	142	Epidermal growth factor receptor substrate 15 OS=Homo sapiens OX=9606 GN=EPS15 PE=1 SV=2	EPS15	5.32174	0.0656213	TRUE			1.18296
Q9Y490	32	88	Talin-1 OS=Homo sapiens OX=9606 GN=TLN1 PE=1 SV=3	TLN1	-0.334408	0.653553	TRUE			0.184719
P46940	32	121	Ras GTPase-activating-like protein IQGAP1 OS=Homo sapiens OX=9606 GN=IQGAP1 PE=1 SV=1	IQGAP1	0.348169	0.76381	TRUE			0.117015
P04264	29	221	Keratin, type II cytoskeletal 1 OS=Homo sapiens OX=9606 GN=KRT1 PE=1 SV=6	KRT1	-0.894725	0.615913	TRUE			0.210481
P49327	29	80	Fatty acid synthase OS=Homo sapiens OX=9606 GN=FASN PE=1 SV=3	FASN	-0.878877	0.634732	TRUE			0.19741
P05783	29	391	Keratin, type I cytoskeletal 18 OS=Homo sapiens OX=9606 GN=KRT18 PE=1 SV=2	KRT18	-0.253885	0.755075	TRUE			0.12201
Q63ZY3	28	137	KN motif and ankyrin repeat domain-containing protein 2 OS=Homo sapiens OX=9606 GN=KANK2 PE=1 SV=1	KANK2	0.500267	0.376073	TRUE			0.424728
P53814	28	166	Smoothelin OS=Homo sapiens OX=9606 GN=SMTN PE=1 SV=7	SMTN	-0.630667	0.422591	TRUE			0.374079
P46821	27	50	Microtubule-associated protein 1B OS=Homo sapiens OX=9606 GN=MAP1B PE=1 SV=2	MAP1B	-1.341	0.764838	TRUE			0.116431
Q01813	27	263	ATP-dependent 6-phosphofructokinase, platelet type OS=Homo sapiens OX=9606 GN=PFKP PE=1 SV=2	PFKP	-0.116645	0.897427	TRUE			0.0470007
P11021	27	186	Endoplasmic reticulum chaperone BiP OS=Homo sapiens OX=9606 GN=HSPA5 PE=1 SV=2	HSPA5	-0.0397236	0.929009	TRUE			0.0319801
P25205	26	134	DNA replication licensing factor MCM3 OS=Homo sapiens OX=9606 GN=MCM3 PE=1 SV=3	MCM3	-0.346163	0.753808	TRUE			0.122739
O95071	26	88	E3 ubiquitin-protein ligase UBR5 OS=Homo sapiens OX=9606 GN=UBR5 PE=1 SV=2	UBR5	-0.547299	0.78907	TRUE			0.102884
P27708	26	89	CAD protein OS=Homo sapiens OX=9606 GN=CAD PE=1 SV=3	CAD	-0.0954299	0.958497	TRUE			0.0184094
P35908	25	167	Keratin, type II cytoskeletal 2 epidermal OS=Homo sapiens OX=9606 GN=KRT2 PE=1 SV=2	KRT2	-0.870091	0.61694	TRUE			0.209757
P13645	25	164	Keratin, type I cytoskeletal 10 OS=Homo sapiens OX=9606 GN=KRT10 PE=1 SV=6	KRT10	-0.507181	0.786182	TRUE			0.104477
P52272	25	128	Heterogeneous nuclear ribonucleoprotein M OS=Homo sapiens OX=9606 GN=HNRNPM PE=1 SV=3	HNRNPM	0.0120055	0.972028	TRUE			0.0123214
Q5T5P2	25	84	Sickle tail protein homolog OS=Homo sapiens OX=9606 GN=KIAA1217 PE=1 SV=2	KIAA1217	-0.0228648	0.986211	TRUE			0.00603008
Q9P2E9	24	66	Ribosome-binding protein 1 OS=Homo sapiens OX=9606 GN=RRBP1 PE=1 SV=5		0.955131	0.0975724	TRUE			1.01067
P48634	24	79	Protein PRRC2A OS=Homo sapiens OX=9606 GN=PRRC2A PE=1 SV=3	PRRC2A	0.438448	0.672835	TRUE			0.172092
O00571	24	170	ATP-dependent RNA helicase DDX3X OS=Homo sapiens OX=9606 GN=DDX3X PE=1 SV=3	DDX3X	-0.198077	0.823837	TRUE			0.0841587
Q99569	24	84	Plakophilin-4 OS=Homo sapiens OX=9606 GN=PKP4 PE=1 SV=2	PKP4	0.0660155	0.958497	TRUE			0.0184094
M0R165	23	73	Epidermal growth factor receptor substrate 15-like 1 OS=Homo sapiens OX=9606 GN=EPS15L1 PE=1 SV=1		7.35864	0.11404	TRUE			0.942942
Q14764	23	90	Major vault protein OS=Homo sapiens OX=9606 GN=MVP PE=1 SV=4	MVP	-0.659682	0.206352	TRUE			0.685392
P14618	23	130	Pyruvate kinase PKM OS=Homo sapiens OX=9606 GN=PKM PE=1 SV=4	PKM	0.0126696	0.986044	TRUE			0.00610352
A0A024R4E5	22	67	High density lipoprotein binding protein (Vigilin), isoform CRA_a OS=Homo sapiens OX=9606 GN=HDLBP PE=1 SV=1	HDLBP	0.787046	0.13342	TRUE			0.874778
P33992	22	142	DNA replication licensing factor MCM5 OS=Homo sapiens OX=9606 GN=MCM5 PE=1 SV=5	MCM5	-0.455871	0.525263	TRUE			0.279623
P27816	22	88	Microtubule-associated protein 4 OS=Homo sapiens OX=9606 GN=MAP4 PE=1 SV=3	MAP4	0.280303	0.762441	TRUE			0.117794
A0A087WVQ6	22	69	Clathrin heavy chain OS=Homo sapiens OX=9606 GN=CLTC PE=1 SV=1	CLTC	0.443695	0.805591	TRUE			0.0938855
Q9NVI7	22	128	ATPase family AAA domain-containing protein 3A OS=Homo sapiens OX=9606 GN=ATAD3A PE=1 SV=2	ATAD3A	0.197713	0.878039	TRUE			0.056486
Q8N163	22	98	Cell cycle and apoptosis regulator protein 2 OS=Homo sapiens OX=9606 GN=CCAR2 PE=1 SV=2	CCAR2;KIAA1967	-0.0511451	0.953036	TRUE			0.0208906
Q9H0D6	21	125	5'-3' exoribonuclease 2 OS=Homo sapiens OX=9606 GN=XRN2 PE=1 SV=1	XRN2	-0.353466	0.743316	TRUE			0.128827
P78344	21	86	Eukaryotic translation initiation factor 4 gamma 2 OS=Homo sapiens OX=9606 GN=EIF4G2 PE=1 SV=1	EIF4G2	0.233827	0.815074	TRUE			0.0888032
Q99959	21	106	Plakophilin-2 OS=Homo sapiens OX=9606 GN=PKP2 PE=1 SV=2	PKP2	-0.0448143	0.969696	TRUE			0.0133642
Q9BZH6	21	85	WD repeat-containing protein 11 OS=Homo sapiens OX=9606 GN=WDR11 PE=1 SV=1	WDR11	0.0303291	0.972965	TRUE			0.0119029
O15523	20	140	ATP-dependent RNA helicase DDX3Y OS=Homo sapiens OX=9606 GN=DDX3Y PE=1 SV=2	DDX3Y	0.478343	0.600646	TRUE			0.221382
Q92841	20	157	Probable ATP-dependent RNA helicase DDX17 OS=Homo sapiens OX=9606 GN=DDX17 PE=1 SV=2	DDX17	-0.239425	0.717554	TRUE			0.144146
P10809	20	99	60 kDa heat shock protein, mitochondrial OS=Homo sapiens OX=9606 GN=HSPD1 PE=1 SV=2	HSPD1	0.137653	0.791994	TRUE			0.101278
Q5JSZ5	19	61	Protein PRRC2B OS=Homo sapiens OX=9606 GN=PRRC2B PE=1 SV=2	PRRC2B	0.678267	0.331265	TRUE			0.479824
A0A6Q8PFJ0	19	81	Prelamin-A/C OS=Homo sapiens OX=9606 GN=LMNA PE=4 SV=1		-0.534159	0.447127	TRUE			0.349569
P08238	19	119	Heat shock protein HSP 90-beta OS=Homo sapiens OX=9606 GN=HSP90AB1 PE=1 SV=4	HSP90AB1	-0.372315	0.862879	TRUE			0.0640503
P13647	19	85	Keratin, type II cytoskeletal 5 OS=Homo sapiens OX=9606 GN=KRT5 PE=1 SV=3	KRT5	-0.226912	0.922162	TRUE			0.0351929
C9JE98	19	83	Nuclear receptor corepressor 2 OS=Homo sapiens OX=9606 GN=NCOR2 PE=1 SV=1	NCOR2	0.0554827	0.969265	TRUE			0.0135574
F1T0I1	18	54	Protein transport protein sec16 OS=Homo sapiens OX=9606 GN=SEC16A PE=1 SV=1	SEC16A	-0.917095	0.337902	TRUE			0.47121
P17858	18	195	ATP-dependent 6-phosphofructokinase, liver type OS=Homo sapiens OX=9606 GN=PFKL PE=1 SV=6	PFKL	-0.357156	0.622009	TRUE			0.206203
F5H5D3	18	171	Tubulin alpha chain OS=Homo sapiens OX=9606 GN=TUBA1C PE=1 SV=1	TUBA1C	-0.400032	0.634732	TRUE			0.19741
Q92945	18	55	Far upstream element-binding protein 2 OS=Homo sapiens OX=9606 GN=KHSRP PE=1 SV=4	KHSRP	-0.763107	0.654941	TRUE			0.183797
P02538	18	111	Keratin, type II cytoskeletal 6A OS=Homo sapiens OX=9606 GN=KRT6A PE=1 SV=3	KRT6A	1.8872	0.677309	TRUE			0.169213
Q9NQW6	18	67	Anillin OS=Homo sapiens OX=9606 GN=ANLN PE=1 SV=2	ANLN	-0.385771	0.683177	TRUE			0.165467
O75746	18	58	Calcium-binding mitochondrial carrier protein Aralar1 OS=Homo sapiens OX=9606 GN=SLC25A12 PE=1 SV=2	SLC25A12	0.310177	0.750607	TRUE			0.124588
Q9UJS0	18	83	Calcium-binding mitochondrial carrier protein Aralar2 OS=Homo sapiens OX=9606 GN=SLC25A13 PE=1 SV=2	SLC25A13	0.28142	0.754535	TRUE			0.122321
Q13263	18	53	Transcription intermediary factor 1-beta OS=Homo sapiens OX=9606 GN=TRIM28 PE=1 SV=5	TRIM28	-1.68061	0.761264	TRUE			0.118465
A0A0G2JIW1	18	108	Heat shock 70 kDa protein 1B OS=Homo sapiens OX=9606 GN=HSPA1B PE=1 SV=1		-0.43235	0.797321	TRUE			0.0983669
Q13885	18	525	Tubulin beta-2A chain OS=Homo sapiens OX=9606 GN=TUBB2A PE=1 SV=1	TUBB2A	0.184846	0.85769	TRUE			0.0666696
Q9BVA1	18	526	Tubulin beta-2B chain OS=Homo sapiens OX=9606 GN=TUBB2B PE=1 SV=1	TUBB2B	0.10712	0.894775	TRUE			0.0482861
J3KTA4	18	161	DEAD box protein 5 OS=Homo sapiens OX=9606 GN=DDX5 PE=1 SV=1	DDX5	-0.159945	0.917148	TRUE			0.0375607
P11586	18	52	C-1-tetrahydrofolate synthase, cytoplasmic OS=Homo sapiens OX=9606 GN=MTHFD1 PE=1 SV=3	MTHFD1	-0.148548	0.924791	TRUE			0.0339566
P68371	18	602	Tubulin beta-4B chain OS=Homo sapiens OX=9606 GN=TUBB4B PE=1 SV=1	TUBB4B	0.127999	0.942197	TRUE			0.0258585
P42704	18	48	Leucine-rich PPR motif-containing protein, mitochondrial OS=Homo sapiens OX=9606 GN=LRPPRC PE=1 SV=3	LRPPRC	0.0987295	0.942197	TRUE			0.0258585
P07437	18	687	Tubulin beta chain OS=Homo sapiens OX=9606 GN=TUBB PE=1 SV=2	TUBB	-0.0862058	0.942439	TRUE			0.0257466
P07814	18	55	Bifunctional glutamate/proline--tRNA ligase OS=Homo sapiens OX=9606 GN=EPRS1 PE=1 SV=5	EPRS	-0.15778	0.953814	TRUE			0.0205363
P33993	18	73	DNA replication licensing factor MCM7 OS=Homo sapiens OX=9606 GN=MCM7 PE=1 SV=4	MCM7	-0.0549051	0.964526	TRUE			0.0156859
Q9BUF5	18	389	Tubulin beta-6 chain OS=Homo sapiens OX=9606 GN=TUBB6 PE=1 SV=1	TUBB6	0	1	TRUE			0
Q07065	17	66	Cytoskeleton-associated protein 4 OS=Homo sapiens OX=9606 GN=CKAP4 PE=1 SV=2	CKAP4	0.799103	0.269742	TRUE			0.569052
Q08211	17	44	ATP-dependent RNA helicase A OS=Homo sapiens OX=9606 GN=DHX9 PE=1 SV=4	DHX9	-0.418701	0.410258	TRUE			0.386943
P35527	17	116	Keratin, type I cytoskeletal 9 OS=Homo sapiens OX=9606 GN=KRT9 PE=1 SV=3	KRT9	-1.21317	0.443467	TRUE			0.353139
Q86SQ0	17	96	Pleckstrin homology-like domain family B member 2 OS=Homo sapiens OX=9606 GN=PHLDB2 PE=1 SV=2	PHLDB2	-0.577149	0.534325	TRUE			0.272195
C9JZR2	17	68	Catenin delta-1 OS=Homo sapiens OX=9606 GN=CTNND1 PE=1 SV=2	CTNND1	-0.413951	0.61494	TRUE			0.211167
P05023	17	61	Sodium/potassium-transporting ATPase subunit alpha-1 OS=Homo sapiens OX=9606 GN=ATP1A1 PE=1 SV=1	ATP1A1	-0.185466	0.697125	TRUE			0.156689
O75165	17	47	DnaJ homolog subfamily C member 13 OS=Homo sapiens OX=9606 GN=DNAJC13 PE=1 SV=5	DNAJC13	0.446462	0.704986	TRUE			0.15182
P13639	17	51	Elongation factor 2 OS=Homo sapiens OX=9606 GN=EEF2 PE=1 SV=4	EEF2	-0.499056	0.734286	TRUE			0.134135
P04259	17	113	Keratin, type II cytoskeletal 6B OS=Homo sapiens OX=9606 GN=KRT6B PE=1 SV=5	KRT6B	1.57409	0.74194	TRUE			0.129631
P51610	17	36	Host cell factor 1 OS=Homo sapiens OX=9606 GN=HCFC1 PE=1 SV=2	HCFC1	-1.20934	0.779421	TRUE			0.108228
Q96RT1	17	63	Erbin OS=Homo sapiens OX=9606 GN=ERBIN PE=1 SV=2	ERBB2IP;ERBIN	-0.213561	0.813553	TRUE			0.089614
A6NEM2	17	35	Host cell factor 1 OS=Homo sapiens OX=9606 GN=HCFC1 PE=1 SV=2	HCFC1	-0.80696	0.850123	TRUE			0.0705183
P78347	17	53	General transcription factor II-I OS=Homo sapiens OX=9606 GN=GTF2I PE=1 SV=2	GTF2I	-0.0743441	0.969222	TRUE			0.0135767
P08779	17	93	Keratin, type I cytoskeletal 16 OS=Homo sapiens OX=9606 GN=KRT16 PE=1 SV=4	KRT16	-0.000233236	1	TRUE			0
Q6P1N0	16	61	Coiled-coil and C2 domain-containing protein 1A OS=Homo sapiens OX=9606 GN=CC2D1A PE=1 SV=1	CC2D1A	0.679672	0.33021	TRUE			0.48121
P06733	16	63	Alpha-enolase OS=Homo sapiens OX=9606 GN=ENO1 PE=1 SV=2	ENO1	-1.33062	0.410762	TRUE			0.386409
P68366	16	108	Tubulin alpha-4A chain OS=Homo sapiens OX=9606 GN=TUBA4A PE=1 SV=1	TUBA4A	-0.522756	0.506872	TRUE			0.295102
Q9NXV6	16	59	CDKN2A-interacting protein OS=Homo sapiens OX=9606 GN=CDKN2AIP PE=1 SV=3	CDKN2AIP	-0.50378	0.697125	TRUE			0.156689
Q92616	16	32	eIF-2-alpha kinase activator GCN1 OS=Homo sapiens OX=9606 GN=GCN1 PE=1 SV=6	GCN1L1;GCN1	-0.534511	0.708149	TRUE			0.149875
P25705	16	152	ATP synthase subunit alpha, mitochondrial OS=Homo sapiens OX=9606 GN=ATP5F1A PE=1 SV=1	ATP5A1	-0.200769	0.730401	TRUE			0.136439
P04350	16	558	Tubulin beta-4A chain OS=Homo sapiens OX=9606 GN=TUBB4A PE=1 SV=2	TUBB4A	0.809087	0.80691	TRUE			0.0931751
O43707	16	58	Alpha-actinin-4 OS=Homo sapiens OX=9606 GN=ACTN4 PE=1 SV=2	ACTN4	0.119653	0.822026	TRUE			0.0851142
P61978	16	221	Heterogeneous nuclear ribonucleoprotein K OS=Homo sapiens OX=9606 GN=HNRNPK PE=1 SV=1	HNRNPK	-0.0814634	0.856826	TRUE			0.0671072
P02533	16	93	Keratin, type I cytoskeletal 14 OS=Homo sapiens OX=9606 GN=KRT14 PE=1 SV=4	KRT14	-0.256841	0.922162	TRUE			0.0351929
M0QZM1	16	89	Heterogeneous nuclear ribonucleoprotein M (Fragment) OS=Homo sapiens OX=9606 GN=HNRNPM PE=1 SV=1		-0.125252	0.937294	TRUE			0.0281244
Q9Y6N5	15	59	Sulfide:quinone oxidoreductase, mitochondrial OS=Homo sapiens OX=9606 GN=SQOR PE=1 SV=1	SQRDL;SQOR	0.83414	0.337902	TRUE			0.47121
Q92499	15	59	ATP-dependent RNA helicase DDX1 OS=Homo sapiens OX=9606 GN=DDX1 PE=1 SV=2	DDX1	-0.404308	0.740518	TRUE			0.130465
P68104	15	218	Elongation factor 1-alpha 1 OS=Homo sapiens OX=9606 GN=EEF1A1 PE=1 SV=1	EEF1A1	-0.383393	0.762441	TRUE			0.117794
P52732	15	18	Kinesin-like protein KIF11 OS=Homo sapiens OX=9606 GN=KIF11 PE=1 SV=2	KIF11	-1.62699	0.856826	TRUE			0.0671072
Q6R327	15	40	Rapamycin-insensitive companion of mTOR OS=Homo sapiens OX=9606 GN=RICTOR PE=1 SV=1	RICTOR	0.354794	0.862166	TRUE			0.064409
P38646	15	40	Stress-70 protein, mitochondrial OS=Homo sapiens OX=9606 GN=HSPA9 PE=1 SV=2	HSPA9	-0.544964	0.862879	TRUE			0.0640503
P14625	15	51	Endoplasmin OS=Homo sapiens OX=9606 GN=HSP90B1 PE=1 SV=1	HSP90B1	-0.0797819	0.865988	TRUE			0.062488
P35221	15	56	Catenin alpha-1 OS=Homo sapiens OX=9606 GN=CTNNA1 PE=1 SV=1	CTNNA1	0.124245	0.905874	TRUE			0.0429322
Q14527	15	48	Helicase-like transcription factor OS=Homo sapiens OX=9606 GN=HLTF PE=1 SV=2	HLTF	0.134983	0.936353	TRUE			0.0285605
A0A087WTT1	15	62	Polyadenylate-binding protein OS=Homo sapiens OX=9606 GN=PABPC1 PE=1 SV=1		-0.107364	0.959519	TRUE			0.0179464
A0A494C1T9	15	63	Protein FAM83H OS=Homo sapiens OX=9606 GN=FAM83H PE=1 SV=1		0.0489888	0.981447	TRUE			0.00813315
Q9UQ35	14	71	Serine/arginine repetitive matrix protein 2 OS=Homo sapiens OX=9606 GN=SRRM2 PE=1 SV=2	SRRM2	0.773449	0.292754	TRUE			0.533497
Q6KB66	14	56	Keratin, type II cytoskeletal 80 OS=Homo sapiens OX=9606 GN=KRT80 PE=1 SV=2	KRT80	0.597282	0.584783	TRUE			0.233006
Q96PK6	14	75	RNA-binding protein 14 OS=Homo sapiens OX=9606 GN=RBM14 PE=1 SV=2	RBM14;RBM14-RBM4	0.584856	0.600928	TRUE			0.221178
P08237	14	63	ATP-dependent 6-phosphofructokinase, muscle type OS=Homo sapiens OX=9606 GN=PFKM PE=1 SV=2	PFKM	0.80427	0.663159	TRUE			0.178382
P50990	14	34	T-complex protein 1 subunit theta OS=Homo sapiens OX=9606 GN=CCT8 PE=1 SV=4	CCT8	-0.791829	0.727066	TRUE			0.138426
P07900	14	83	Heat shock protein HSP 90-alpha OS=Homo sapiens OX=9606 GN=HSP90AA1 PE=1 SV=5	HSP90AA1	-0.854192	0.743316	TRUE			0.128827
P60709	14	200	Actin, cytoplasmic 1 OS=Homo sapiens OX=9606 GN=ACTB PE=1 SV=1	ACTB	-0.580365	0.755075	TRUE			0.12201
Q06830	14	135	Peroxiredoxin-1 OS=Homo sapiens OX=9606 GN=PRDX1 PE=1 SV=1	PRDX1	-1.65825	0.769599	TRUE			0.113735
Q13049	14	74	E3 ubiquitin-protein ligase TRIM32 OS=Homo sapiens OX=9606 GN=TRIM32 PE=1 SV=2	TRIM32	0.42622	0.788887	TRUE			0.102985
Q8IWZ3	14	40	Ankyrin repeat and KH domain-containing protein 1 OS=Homo sapiens OX=9606 GN=ANKHD1 PE=1 SV=1	ANKHD1;ANKHD1-EIF4EBP3	0.407785	0.797321	TRUE			0.0983669
Q9UHD8	14	69	Septin-9 OS=Homo sapiens OX=9606 GN=SEPTIN9 PE=1 SV=2	44813	0.202499	0.813553	TRUE			0.089614
Q8TEQ6	14	26	Gem-associated protein 5 OS=Homo sapiens OX=9606 GN=GEMIN5 PE=1 SV=3	GEMIN5	-1.69124	0.81413	TRUE			0.0893063
E7EPN9	14	37	Protein PRRC2C OS=Homo sapiens OX=9606 GN=PRRC2C PE=1 SV=1	PRRC2C	-0.276532	0.862561	TRUE			0.0642102
O75643	14	28	U5 small nuclear ribonucleoprotein 200 kDa helicase OS=Homo sapiens OX=9606 GN=SNRNP200 PE=1 SV=2	SNRNP200	0.139711	0.942197	TRUE			0.0258585
P63261	14	201	Actin, cytoplasmic 2 OS=Homo sapiens OX=9606 GN=ACTG1 PE=1 SV=1	ACTG1	0.155917	0.983876	TRUE			0.00705958
Q8WWI1	14	50	LIM domain only protein 7 OS=Homo sapiens OX=9606 GN=LMO7 PE=1 SV=3	LMO7	0.0126622	0.988828	TRUE			0.0048792
P54652	14	118	Heat shock-related 70 kDa protein 2 OS=Homo sapiens OX=9606 GN=HSPA2 PE=1 SV=1	HSPA2	0.0112752	0.988828	TRUE			0.0048792
C9J2Y9	14	47	DNA-directed RNA polymerase subunit beta OS=Homo sapiens OX=9606 GN=POLR2B PE=1 SV=2	POLR2B	0.00943876	0.990022	TRUE			0.00435521
Q9H845	14	58	Complex I assembly factor ACAD9, mitochondrial OS=Homo sapiens OX=9606 GN=ACAD9 PE=1 SV=1	ACAD9	-0.00216377	0.998407	TRUE			0.000692406
A0A1B0GTN9	13	59	Pleckstrin homology domain-containing family A member 7 (Fragment) OS=Homo sapiens OX=9606 GN=PLEKHA7 PE=1 SV=1		1.54443	0.117137	TRUE			0.931305
A0A140TA69	13	44	Keratin, type I cuticular Ha4 OS=Homo sapiens OX=9606 GN=KRT34 PE=3 SV=1		-1.22098	0.13342	TRUE			0.874778
P36578	13	51	60S ribosomal protein L4 OS=Homo sapiens OX=9606 GN=RPL4 PE=1 SV=5	RPL4	1.47078	0.232056	TRUE			0.634408
H0Y4R1	13	50	Inosine-5'-monophosphate dehydrogenase 2 (Fragment) OS=Homo sapiens OX=9606 GN=IMPDH2 PE=1 SV=1		0.866527	0.337902	TRUE			0.47121
P23396	13	112	40S ribosomal protein S3 OS=Homo sapiens OX=9606 GN=RPS3 PE=1 SV=2	RPS3	0.713206	0.531366	TRUE			0.274606
Q96N67	13	30	Dedicator of cytokinesis protein 7 OS=Homo sapiens OX=9606 GN=DOCK7 PE=1 SV=4	DOCK7	0.602644	0.665209	TRUE			0.177042
F5GY37	13	53	Prohibitin OS=Homo sapiens OX=9606 GN=PHB2 PE=1 SV=1		0.306352	0.754535	TRUE			0.122321
P33176	13	27	Kinesin-1 heavy chain OS=Homo sapiens OX=9606 GN=KIF5B PE=1 SV=1	KIF5B	-0.666519	0.780819	TRUE			0.10745
P06576	13	88	ATP synthase subunit beta, mitochondrial OS=Homo sapiens OX=9606 GN=ATP5F1B PE=1 SV=3	ATP5B	0.421117	0.79344	TRUE			0.100486
Q14204	13	32	Cytoplasmic dynein 1 heavy chain 1 OS=Homo sapiens OX=9606 GN=DYNC1H1 PE=1 SV=5	DYNC1H1	-0.515076	0.809508	TRUE			0.0917789
Q9Y3I0	13	77	RNA-splicing ligase RtcB homolog OS=Homo sapiens OX=9606 GN=RTCB PE=1 SV=1	C22orf28;RTCB	-0.318204	0.813553	TRUE			0.089614
F5GY05	13	79	Constitutive coactivator of peroxisome proliferator-activated receptor gamma OS=Homo sapiens OX=9606 GN=FAM120B PE=1 SV=1	FAM120B	0.253528	0.816582	TRUE			0.0880003
P53396	13	34	ATP-citrate synthase OS=Homo sapiens OX=9606 GN=ACLY PE=1 SV=3	ACLY	-0.343804	0.87599	TRUE			0.0575006
Q7KZF4	13	40	Staphylococcal nuclease domain-containing protein 1 OS=Homo sapiens OX=9606 GN=SND1 PE=1 SV=1	SND1	-0.257336	0.882091	TRUE			0.0544864
P07355	13	48	Annexin A2 OS=Homo sapiens OX=9606 GN=ANXA2 PE=1 SV=2	ANXA2	0.0800365	0.893479	TRUE			0.0489157
Q9NSV4	13	28	Protein diaphanous homolog 3 OS=Homo sapiens OX=9606 GN=DIAPH3 PE=1 SV=4	DIAPH3	-0.152017	0.933663	TRUE			0.02981
A8MQ02	13	45	Afadin OS=Homo sapiens OX=9606 GN=AFDN PE=1 SV=2	MLLT4;AFDN	0.0614821	0.947611	TRUE			0.0233698
Q96HC4	13	37	PDZ and LIM domain protein 5 OS=Homo sapiens OX=9606 GN=PDLIM5 PE=1 SV=5	PDLIM5	0.0647701	0.957558	TRUE			0.0188347
P41252	13	35	Isoleucine--tRNA ligase, cytoplasmic OS=Homo sapiens OX=9606 GN=IARS1 PE=1 SV=2	IARS	-0.0683606	0.981447	TRUE			0.00813315
P04406	12	68	Glyceraldehyde-3-phosphate dehydrogenase OS=Homo sapiens OX=9606 GN=GAPDH PE=1 SV=3	GAPDH	-0.891001	0.299599	TRUE			0.52346
P61247	12	52	40S ribosomal protein S3a OS=Homo sapiens OX=9606 GN=RPS3A PE=1 SV=2	RPS3A	1.52501	0.315596	TRUE			0.500869
P49748	12	39	Very long-chain specific acyl-CoA dehydrogenase, mitochondrial OS=Homo sapiens OX=9606 GN=ACADVL PE=1 SV=1	ACADVL	-0.412449	0.349415	TRUE			0.456658
Q15365	12	87	Poly(rC)-binding protein 1 OS=Homo sapiens OX=9606 GN=PCBP1 PE=1 SV=2	PCBP1	-0.622402	0.449345	TRUE			0.34742
Q13425	12	38	Beta-2-syntrophin OS=Homo sapiens OX=9606 GN=SNTB2 PE=1 SV=1	SNTB2	0.564157	0.521198	TRUE			0.282997
A6NNK5	12	14	TP53-binding protein 1 OS=Homo sapiens OX=9606 GN=TP53BP1 PE=1 SV=2	TP53BP1	-3.54034	0.573945	TRUE			0.24113
Q5UIP0	12	12	Telomere-associated protein RIF1 OS=Homo sapiens OX=9606 GN=RIF1 PE=1 SV=2	RIF1	-3.32395	0.600928	TRUE			0.221178
P04075	12	29	Fructose-bisphosphate aldolase A OS=Homo sapiens OX=9606 GN=ALDOA PE=1 SV=2	ALDOA	-1.16271	0.609079	TRUE			0.215327
P51659	12	34	Peroxisomal multifunctional enzyme type 2 OS=Homo sapiens OX=9606 GN=HSD17B4 PE=1 SV=3	HSD17B4	-0.49188	0.61494	TRUE			0.211167
B9A067	12	23	MICOS complex subunit MIC60 OS=Homo sapiens OX=9606 GN=IMMT PE=1 SV=2	IMMT	-0.34554	0.637178	TRUE			0.195739
Q96C36	12	79	Pyrroline-5-carboxylate reductase 2 OS=Homo sapiens OX=9606 GN=PYCR2 PE=1 SV=1	PYCR2	0.413538	0.739115	TRUE			0.131288
O43143	12	58	Pre-mRNA-splicing factor ATP-dependent RNA helicase DHX15 OS=Homo sapiens OX=9606 GN=DHX15 PE=1 SV=2	DHX15	0.490783	0.759333	TRUE			0.119568
Q8WVB6	12	36	Chromosome transmission fidelity protein 18 homolog OS=Homo sapiens OX=9606 GN=CHTF18 PE=1 SV=1	CHTF18	-0.192381	0.760866	TRUE			0.118692
Q15393	12	36	Splicing factor 3B subunit 3 OS=Homo sapiens OX=9606 GN=SF3B3 PE=1 SV=4	SF3B3	0.389643	0.802686	TRUE			0.0954544
P05141	12	91	ADP/ATP translocase 2 OS=Homo sapiens OX=9606 GN=SLC25A5 PE=1 SV=7	SLC25A5	0.386799	0.816611	TRUE			0.0879847
P50991	12	19	T-complex protein 1 subunit delta OS=Homo sapiens OX=9606 GN=CCT4 PE=1 SV=4	CCT4	-0.696078	0.836219	TRUE			0.0776797
P60842	12	73	Eukaryotic initiation factor 4A-I OS=Homo sapiens OX=9606 GN=EIF4A1 PE=1 SV=1	EIF4A1	-0.233851	0.862166	TRUE			0.064409
A0A087WVM4	12	30	Formyltetrahydrofolate synthetase OS=Homo sapiens OX=9606 GN=MTHFD1L PE=1 SV=1	MTHFD1L	0.182925	0.890183	TRUE			0.0505208
P26599	12	43	Polypyrimidine tract-binding protein 1 OS=Homo sapiens OX=9606 GN=PTBP1 PE=1 SV=1	PTBP1	0.202117	0.918164	TRUE			0.03708
Q9NR12	12	62	PDZ and LIM domain protein 7 OS=Homo sapiens OX=9606 GN=PDLIM7 PE=1 SV=1	PDLIM7	-0.150167	0.92461	TRUE			0.0340416
Q14980	12	40	Nuclear mitotic apparatus protein 1 OS=Homo sapiens OX=9606 GN=NUMA1 PE=1 SV=2	NUMA1	0.106794	0.926509	TRUE			0.0331503
Q15678	12	34	Tyrosine-protein phosphatase non-receptor type 14 OS=Homo sapiens OX=9606 GN=PTPN14 PE=1 SV=2	PTPN14	-0.111355	0.942439	TRUE			0.0257466
P16403	12	55	Histone H1.2 OS=Homo sapiens OX=9606 GN=H1-2 PE=1 SV=2	HIST1H1C	-0.164963	0.983747	TRUE			0.00711665
P32322	12	67	Pyrroline-5-carboxylate reductase 1, mitochondrial OS=Homo sapiens OX=9606 GN=PYCR1 PE=1 SV=2	PYCR1	-0.0118181	0.988828	TRUE			0.0048792
Q14525	11	59	Keratin, type I cuticular Ha3-II OS=Homo sapiens OX=9606 GN=KRT33B PE=1 SV=3	KRT33B	-1.7852	0.0887959	TRUE			1.05161
O00159	11	32	Unconventional myosin-Ic OS=Homo sapiens OX=9606 GN=MYO1C PE=1 SV=4	MYO1C	1.17926	0.107358	TRUE			0.969165
P18206	11	27	Vinculin OS=Homo sapiens OX=9606 GN=VCL PE=1 SV=4	VCL	-0.989218	0.226092	TRUE			0.645715
P19338	11	44	Nucleolin OS=Homo sapiens OX=9606 GN=NCL PE=1 SV=3	NCL	1.06429	0.333384	TRUE			0.477055
G3V1L9	11	22	Tight junction protein 1 (Zona occludens 1), isoform CRA_a OS=Homo sapiens OX=9606 GN=TJP1 PE=1 SV=1	TJP1	0.681905	0.388454	TRUE			0.410661
P07996	11	30	Thrombospondin-1 OS=Homo sapiens OX=9606 GN=THBS1 PE=1 SV=2	THBS1	-0.50356	0.469567	TRUE			0.328303
Q13724	11	34	Mannosyl-oligosaccharide glucosidase OS=Homo sapiens OX=9606 GN=MOGS PE=1 SV=5	MOGS	0.74938	0.521198	TRUE			0.282997
P78371	11	37	T-complex protein 1 subunit beta OS=Homo sapiens OX=9606 GN=CCT2 PE=1 SV=4	CCT2	-0.786505	0.634732	TRUE			0.19741
Q8WX93	11	32	Palladin OS=Homo sapiens OX=9606 GN=PALLD PE=1 SV=3	PALLD	-0.283537	0.67023	TRUE			0.173776
Q9BXL5	11	24	Hemogen OS=Homo sapiens OX=9606 GN=HEMGN PE=1 SV=1	HEMGN	-4.31961	0.67883	TRUE			0.168239
P02786	11	24	Transferrin receptor protein 1 OS=Homo sapiens OX=9606 GN=TFRC PE=1 SV=2	TFRC	-0.28845	0.688586	TRUE			0.162042
F8W726	11	48	Ubiquitin-associated protein 2-like OS=Homo sapiens OX=9606 GN=UBAP2L PE=1 SV=2	UBAP2L	-0.260042	0.697756	TRUE			0.156297
M0R2B7	11	29	DNA polymerase OS=Homo sapiens OX=9606 GN=POLD1 PE=1 SV=1	POLD1	-0.428869	0.697756	TRUE			0.156297
O14578	11	42	Citron Rho-interacting kinase OS=Homo sapiens OX=9606 GN=CIT PE=1 SV=2	CIT	-0.27423	0.741018	TRUE			0.130172
P04792	11	183	Heat shock protein beta-1 OS=Homo sapiens OX=9606 GN=HSPB1 PE=1 SV=2	HSPB1	-0.287412	0.769599	TRUE			0.113735
A0A087X0K9	11	22	Tight junction protein ZO-1 OS=Homo sapiens OX=9606 GN=TJP1 PE=1 SV=1		0.505273	0.79314	TRUE			0.10065
P10412	11	45	Histone H1.4 OS=Homo sapiens OX=9606 GN=H1-4 PE=1 SV=2	HIST1H1E	-2.0556	0.804127	TRUE			0.0946756
P42345	11	31	Serine/threonine-protein kinase mTOR OS=Homo sapiens OX=9606 GN=MTOR PE=1 SV=1	MTOR	-0.190505	0.80988	TRUE			0.0915793
H0YFD6	11	34	Enoyl-CoA hydratase OS=Homo sapiens OX=9606 GN=HADHA PE=1 SV=2		-0.16755	0.816611	TRUE			0.0879847
Q93009	11	24	Ubiquitin carboxyl-terminal hydrolase 7 OS=Homo sapiens OX=9606 GN=USP7 PE=1 SV=2	USP7	-0.315585	0.817935	TRUE			0.087281
Q9C0C7	11	38	Activating molecule in BECN1-regulated autophagy protein 1 OS=Homo sapiens OX=9606 GN=AMBRA1 PE=1 SV=2	AMBRA1	-0.192363	0.832166	TRUE			0.0797899
Q92626	11	40	Peroxidasin homolog OS=Homo sapiens OX=9606 GN=PXDN PE=1 SV=2	PXDN	-0.206472	0.850123	TRUE			0.0705183
P28331	11	28	NADH-ubiquinone oxidoreductase 75 kDa subunit, mitochondrial OS=Homo sapiens OX=9606 GN=NDUFS1 PE=1 SV=3	NDUFS1	0.161137	0.872013	TRUE			0.059477
P63104	11	46	14-3-3 protein zeta/delta OS=Homo sapiens OX=9606 GN=YWHAZ PE=1 SV=1	YWHAZ	0.258891	0.87599	TRUE			0.0575006
Q9NUI1	11	35	Peroxisomal 2,4-dienoyl-CoA reductase OS=Homo sapiens OX=9606 GN=DECR2 PE=1 SV=1	DECR2	0.107488	0.922162	TRUE			0.0351929
A5YKK6	11	24	CCR4-NOT transcription complex subunit 1 OS=Homo sapiens OX=9606 GN=CNOT1 PE=1 SV=2	CNOT1	-0.191679	0.922781	TRUE			0.0349015
O95347	11	24	Structural maintenance of chromosomes protein 2 OS=Homo sapiens OX=9606 GN=SMC2 PE=1 SV=2	SMC2	0.18318	0.92361	TRUE			0.0345115
Q9UQE7	11	23	Structural maintenance of chromosomes protein 3 OS=Homo sapiens OX=9606 GN=SMC3 PE=1 SV=2	SMC3	0.18071	0.934127	TRUE			0.029594
Q5SW79	11	33	Centrosomal protein of 170 kDa OS=Homo sapiens OX=9606 GN=CEP170 PE=1 SV=1	CEP170	-0.152677	0.93825	TRUE			0.0276816
Q8WWN8	11	30	Arf-GAP with Rho-GAP domain, ANK repeat and PH domain-containing protein 3 OS=Homo sapiens OX=9606 GN=ARAP3 PE=1 SV=1	ARAP3	0.0900076	0.941217	TRUE			0.0263104
Q16531	11	28	DNA damage-binding protein 1 OS=Homo sapiens OX=9606 GN=DDB1 PE=1 SV=1	DDB1	-0.138531	0.953036	TRUE			0.0208906
P09543	11	33	2',3'-cyclic-nucleotide 3'-phosphodiesterase OS=Homo sapiens OX=9606 GN=CNP PE=1 SV=2	CNP	0.0921905	0.966472	TRUE			0.0148108
Q658Y4	11	54	Protein FAM91A1 OS=Homo sapiens OX=9606 GN=FAM91A1 PE=1 SV=3	FAM91A1	0.12815	0.966701	TRUE			0.0147079
Q13428	11	17	Treacle protein OS=Homo sapiens OX=9606 GN=TCOF1 PE=1 SV=3	TCOF1	0.0467646	0.990168	TRUE			0.00429128
Q9NVZ3	10	40	Adaptin ear-binding coat-associated protein 2 OS=Homo sapiens OX=9606 GN=NECAP2 PE=1 SV=1	NECAP2	9.12308	0.076246	TRUE			1.11778
Q86UP2	10	22	Kinectin OS=Homo sapiens OX=9606 GN=KTN1 PE=1 SV=1	KTN1	0.625586	0.163643	TRUE			0.786101
Q15323	10	52	Keratin, type I cuticular Ha1 OS=Homo sapiens OX=9606 GN=KRT31 PE=1 SV=3	KRT31	-1.81761	0.190114	TRUE			0.720986
P51114	10	24	Fragile X mental retardation syndrome-related protein 1 OS=Homo sapiens OX=9606 GN=FXR1 PE=1 SV=3	FXR1	1.03505	0.205653	TRUE			0.686864
P20700	10	22	Lamin-B1 OS=Homo sapiens OX=9606 GN=LMNB1 PE=1 SV=2	LMNB1	-1.13616	0.205653	TRUE			0.686864
Q86VP6	10	27	Cullin-associated NEDD8-dissociated protein 1 OS=Homo sapiens OX=9606 GN=CAND1 PE=1 SV=2	CAND1	-0.600362	0.22132	TRUE			0.65498
P62424	10	46	60S ribosomal protein L7a OS=Homo sapiens OX=9606 GN=RPL7A PE=1 SV=2	RPL7A	1.422	0.233061	TRUE			0.63253
P08727	10	71	Keratin, type I cytoskeletal 19 OS=Homo sapiens OX=9606 GN=KRT19 PE=1 SV=4	KRT19	-3.25769	0.233061	TRUE			0.63253
O95793	10	38	Double-stranded RNA-binding protein Staufen homolog 1 OS=Homo sapiens OX=9606 GN=STAU1 PE=1 SV=2	STAU1	0.658542	0.31708	TRUE			0.498831
Q14152	10	47	Eukaryotic translation initiation factor 3 subunit A OS=Homo sapiens OX=9606 GN=EIF3A PE=1 SV=1	EIF3A	1.04777	0.333384	TRUE			0.477055
Q9BW92	10	20	Threonine--tRNA ligase, mitochondrial OS=Homo sapiens OX=9606 GN=TARS2 PE=1 SV=1	TARS2	0.533308	0.35385	TRUE			0.45118
P02751	10	28	Fibronectin OS=Homo sapiens OX=9606 GN=FN1 PE=1 SV=5		-0.929696	0.368716	TRUE			0.433308
E7EX73	10	27	Eukaryotic translation initiation factor 4 gamma 1 OS=Homo sapiens OX=9606 GN=EIF4G1 PE=1 SV=1	EIF4G1	-0.65342	0.376073	TRUE			0.424728
P47897	10	31	Glutamine--tRNA ligase OS=Homo sapiens OX=9606 GN=QARS1 PE=1 SV=1	QARS	0.416671	0.519665	TRUE			0.284276
P42166	10	35	Lamina-associated polypeptide 2, isoform alpha OS=Homo sapiens OX=9606 GN=TMPO PE=1 SV=2	TMPO	-0.651204	0.526689	TRUE			0.278446
P16402	10	42	Histone H1.3 OS=Homo sapiens OX=9606 GN=H1-3 PE=1 SV=2	HIST1H1D	-3.45199	0.560974	TRUE			0.251058
Q70EL1	10	22	Inactive ubiquitin carboxyl-terminal hydrolase 54 OS=Homo sapiens OX=9606 GN=USP54 PE=1 SV=4	USP54	0.666554	0.582864	TRUE			0.234433
P26038	10	20	Moesin OS=Homo sapiens OX=9606 GN=MSN PE=1 SV=3	MSN	-0.636894	0.599201	TRUE			0.222427
P05388	10	68	60S acidic ribosomal protein P0 OS=Homo sapiens OX=9606 GN=RPLP0 PE=1 SV=1	RPLP0	1.12178	0.600646	TRUE			0.221382
P13646	10	65	Keratin, type I cytoskeletal 13 OS=Homo sapiens OX=9606 GN=KRT13 PE=1 SV=4	KRT13	-0.432764	0.634732	TRUE			0.19741
P29590	10	24	Protein PML OS=Homo sapiens OX=9606 GN=PML PE=1 SV=3	PML	-0.336887	0.683177	TRUE			0.165467
A0A1X7SBS1	10	52	Heterogeneous nuclear ribonucleoprotein U OS=Homo sapiens OX=9606 GN=HNRNPU PE=1 SV=1		0.755351	0.697125	TRUE			0.156689
G5E9Y3	10	28	Arf-GAP with Rho-GAP domain, ANK repeat and PH domain-containing protein 3 OS=Homo sapiens OX=9606 GN=ARAP3 PE=1 SV=1	ARAP3	0.580236	0.805034	TRUE			0.0941857
A0A1P0AYU5	10	48	Sidoreflexin OS=Homo sapiens OX=9606 GN=SFXN3 PE=1 SV=1	SFXN3	0.165258	0.808159	TRUE			0.0925032
Q9Y678	10	27	Coatomer subunit gamma-1 OS=Homo sapiens OX=9606 GN=COPG1 PE=1 SV=1	COPG1	0.372122	0.808356	TRUE			0.0923976
A0A2R8YCH5	10	35	Catenin beta-1 (Fragment) OS=Homo sapiens OX=9606 GN=CTNNB1 PE=1 SV=1		0.19266	0.813552	TRUE			0.0896146
Q92598	10	20	Heat shock protein 105 kDa OS=Homo sapiens OX=9606 GN=HSPH1 PE=1 SV=1	HSPH1	-0.635855	0.813679	TRUE			0.0895468
Q13200	10	42	26S proteasome non-ATPase regulatory subunit 2 OS=Homo sapiens OX=9606 GN=PSMD2 PE=1 SV=3	PSMD2	-0.203669	0.816977	TRUE			0.0877901
O75533	10	27	Splicing factor 3B subunit 1 OS=Homo sapiens OX=9606 GN=SF3B1 PE=1 SV=3	SF3B1	0.283575	0.836219	TRUE			0.0776797
Q8TEW0	10	21	Partitioning defective 3 homolog OS=Homo sapiens OX=9606 GN=PARD3 PE=1 SV=2	PARD3	0.434125	0.845057	TRUE			0.0731139
Q86V48	10	27	Leucine zipper protein 1 OS=Homo sapiens OX=9606 GN=LUZP1 PE=1 SV=2	LUZP1	-0.135264	0.885561	TRUE			0.0527817
Q9C037	10	25	E3 ubiquitin-protein ligase TRIM4 OS=Homo sapiens OX=9606 GN=TRIM4 PE=1 SV=2	TRIM4	-0.15903	0.902071	TRUE			0.0447594
P34897	10	37	Serine hydroxymethyltransferase, mitochondrial OS=Homo sapiens OX=9606 GN=SHMT2 PE=1 SV=3	SHMT2	-0.113482	0.906461	TRUE			0.0426511
Q7Z2W4	10	37	Zinc finger CCCH-type antiviral protein 1 OS=Homo sapiens OX=9606 GN=ZC3HAV1 PE=1 SV=3	ZC3HAV1	0.351554	0.908411	TRUE			0.0417174
Q04695	10	53	Keratin, type I cytoskeletal 17 OS=Homo sapiens OX=9606 GN=KRT17 PE=1 SV=2	KRT17	0.799507	0.909016	TRUE			0.0414284
A0A6I8PL42	10	29	Leucyl-tRNA synthetase OS=Homo sapiens OX=9606 GN=LARS1 PE=1 SV=1		-0.342462	0.918932	TRUE			0.0367166
F5H269	10	19	DmX-like protein 1 OS=Homo sapiens OX=9606 GN=DMXL1 PE=1 SV=1	DMXL1	-0.24518	0.922162	TRUE			0.0351929
P55072	10	26	Transitional endoplasmic reticulum ATPase OS=Homo sapiens OX=9606 GN=VCP PE=1 SV=4	VCP	-0.238987	0.935881	TRUE			0.0287793
O60701	10	38	UDP-glucose 6-dehydrogenase OS=Homo sapiens OX=9606 GN=UGDH PE=1 SV=1	UGDH	-0.0628438	0.945445	TRUE			0.0243637
P02511	10	39	Alpha-crystallin B chain OS=Homo sapiens OX=9606 GN=CRYAB PE=1 SV=2	CRYAB	0.16032	0.963988	TRUE			0.0159283
G3V3A4	10	26	SNW domain-containing protein 1 OS=Homo sapiens OX=9606 GN=SNW1 PE=1 SV=1	SNW1	0.0472699	0.967018	TRUE			0.0145653
A0A669KB89	10	29	Protein scribble homolog OS=Homo sapiens OX=9606 GN=SCRIB PE=1 SV=1		-0.0406044	0.967018	TRUE			0.0145653
P05556	10	40	Integrin beta-1 OS=Homo sapiens OX=9606 GN=ITGB1 PE=1 SV=2	ITGB1	-0.0486364	0.971727	TRUE			0.0124559
C9J6P4	10	32	Zinc finger CCCH-type antiviral protein 1 OS=Homo sapiens OX=9606 GN=ZC3HAV1 PE=1 SV=1	ZC3HAV1	-0.0312413	0.983747	TRUE			0.00711665
P08865	9	88	40S ribosomal protein SA OS=Homo sapiens OX=9606 GN=RPSA PE=1 SV=4	RPSA	1.23735	0.076246	TRUE			1.11778
M0R0F0	9	29	40S ribosomal protein S5 (Fragment) OS=Homo sapiens OX=9606 GN=RPS5 PE=1 SV=1		1.18905	0.212305	TRUE			0.67304
Q9P0V3	9	30	SH3 domain-binding protein 4 OS=Homo sapiens OX=9606 GN=SH3BP4 PE=1 SV=1	SH3BP4	-1.15213	0.245358	TRUE			0.610201
H9KV75	9	37	Alpha-actinin cytoskeletal isoform OS=Homo sapiens OX=9606 GN=ACTN1 PE=1 SV=1		0.975377	0.299599	TRUE			0.52346
H0YAM8	9	22	RING-type E3 ubiquitin transferase (Fragment) OS=Homo sapiens OX=9606 GN=MIB2 PE=1 SV=1		-0.590308	0.306143	TRUE			0.514076
O15357	9	28	Phosphatidylinositol 3,4,5-trisphosphate 5-phosphatase 2 OS=Homo sapiens OX=9606 GN=INPPL1 PE=1 SV=2	INPPL1	0.709487	0.31708	TRUE			0.498831
P39019	9	38	40S ribosomal protein S19 OS=Homo sapiens OX=9606 GN=RPS19 PE=1 SV=2	RPS19	1.44266	0.348034	TRUE			0.458378
P00558	9	18	Phosphoglycerate kinase 1 OS=Homo sapiens OX=9606 GN=PGK1 PE=1 SV=3	PGK1	-2.16582	0.381147	TRUE			0.418908
Q96EY1	9	84	DnaJ homolog subfamily A member 3, mitochondrial OS=Homo sapiens OX=9606 GN=DNAJA3 PE=1 SV=2	DNAJA3	0.325085	0.410762	TRUE			0.386409
P28300	9	50	Protein-lysine 6-oxidase OS=Homo sapiens OX=9606 GN=LOX PE=1 SV=2	LOX	-1.19526	0.413824	TRUE			0.383184
Q32P44	9	32	Echinoderm microtubule-associated protein-like 3 OS=Homo sapiens OX=9606 GN=EML3 PE=1 SV=1	EML3	-0.252151	0.519665	TRUE			0.284276
Q2TAY7	9	24	WD40 repeat-containing protein SMU1 OS=Homo sapiens OX=9606 GN=SMU1 PE=1 SV=2	SMU1	0.840211	0.522323	TRUE			0.282061
Q86UU1	9	19	Pleckstrin homology-like domain family B member 1 OS=Homo sapiens OX=9606 GN=PHLDB1 PE=1 SV=1	PHLDB1	0.862619	0.525162	TRUE			0.279707
P26006	9	23	Integrin alpha-3 OS=Homo sapiens OX=9606 GN=ITGA3 PE=1 SV=5	ITGA3	0.43125	0.546898	TRUE			0.262093
P22695	9	36	Cytochrome b-c1 complex subunit 2, mitochondrial OS=Homo sapiens OX=9606 GN=UQCRC2 PE=1 SV=3	UQCRC2	0.301584	0.546898	TRUE			0.262093
Q99832	9	17	T-complex protein 1 subunit eta OS=Homo sapiens OX=9606 GN=CCT7 PE=1 SV=2	CCT7	-0.728287	0.546898	TRUE			0.262093
H0YNH8	9	18	Uveal autoantigen with coiled-coil domains and ankyrin repeats OS=Homo sapiens OX=9606 GN=UACA PE=1 SV=1		0.708199	0.584783	TRUE			0.233006
Q2M1P5	9	26	Kinesin-like protein KIF7 OS=Homo sapiens OX=9606 GN=KIF7 PE=1 SV=2	KIF7	0.395348	0.601366	TRUE			0.220861
P62280	9	40	40S ribosomal protein S11 OS=Homo sapiens OX=9606 GN=RPS11 PE=1 SV=3	RPS11	0.615981	0.618833	TRUE			0.208427
P19367	9	22	Hexokinase-1 OS=Homo sapiens OX=9606 GN=HK1 PE=1 SV=3	HK1	-0.606509	0.65119	TRUE			0.186292
Q9P265	9	17	Disco-interacting protein 2 homolog B OS=Homo sapiens OX=9606 GN=DIP2B PE=1 SV=3	DIP2B	0.405392	0.659927	TRUE			0.180504
Q5T0Z8	9	25	Uncharacterized protein C6orf132 OS=Homo sapiens OX=9606 GN=C6orf132 PE=1 SV=4	C6orf132	-0.506188	0.677034	TRUE			0.16939
Q9Y6A5	9	12	Transforming acidic coiled-coil-containing protein 3 OS=Homo sapiens OX=9606 GN=TACC3 PE=1 SV=1	TACC3	-2.02877	0.679563	TRUE			0.16777
P12956	9	21	X-ray repair cross-complementing protein 6 OS=Homo sapiens OX=9606 GN=XRCC6 PE=1 SV=2	XRCC6	0.751218	0.730401	TRUE			0.136439
Q9Y4F5	9	27	Centrosomal protein of 170 kDa protein B OS=Homo sapiens OX=9606 GN=CEP170B PE=1 SV=4	CEP170B;KIAA0284	-0.231207	0.746867	TRUE			0.126757
Q8WUM4	9	16	Programmed cell death 6-interacting protein OS=Homo sapiens OX=9606 GN=PDCD6IP PE=1 SV=1	PDCD6IP	-0.970614	0.750549	TRUE			0.124621
P23526	9	13	Adenosylhomocysteinase OS=Homo sapiens OX=9606 GN=AHCY PE=1 SV=4	AHCY	-1.5604	0.753808	TRUE			0.122739
F8VSC5	9	17	SCY1-like protein 2 (Fragment) OS=Homo sapiens OX=9606 GN=SCYL2 PE=1 SV=1		-3.02026	0.754535	TRUE			0.122321
Q9NZM1	9	20	Myoferlin OS=Homo sapiens OX=9606 GN=MYOF PE=1 SV=1	MYOF	0.385197	0.759333	TRUE			0.119568
Q12906	9	41	Interleukin enhancer-binding factor 3 OS=Homo sapiens OX=9606 GN=ILF3 PE=1 SV=3	ILF3	0.529077	0.760866	TRUE			0.118692
Q17RY0	9	30	Cytoplasmic polyadenylation element-binding protein 4 OS=Homo sapiens OX=9606 GN=CPEB4 PE=1 SV=1	CPEB4	0.424055	0.760866	TRUE			0.118692
Q9Y230	9	16	RuvB-like 2 OS=Homo sapiens OX=9606 GN=RUVBL2 PE=1 SV=3	RUVBL2	-0.447416	0.773781	TRUE			0.111382
O75179	9	20	Ankyrin repeat domain-containing protein 17 OS=Homo sapiens OX=9606 GN=ANKRD17 PE=1 SV=3	ANKRD17	0.711891	0.790262	TRUE			0.102229
P17987	9	29	T-complex protein 1 subunit alpha OS=Homo sapiens OX=9606 GN=TCP1 PE=1 SV=1	TCP1	-0.440794	0.797321	TRUE			0.0983669
Q92900	9	20	Regulator of nonsense transcripts 1 OS=Homo sapiens OX=9606 GN=UPF1 PE=1 SV=2	UPF1	-0.237861	0.80361	TRUE			0.0949544
P40227	9	22	T-complex protein 1 subunit zeta OS=Homo sapiens OX=9606 GN=CCT6A PE=1 SV=3	CCT6A	-0.627789	0.836206	TRUE			0.0776866
F8VZX2	9	63	Poly(rC)-binding protein 2 OS=Homo sapiens OX=9606 GN=PCBP2 PE=1 SV=1	PCBP2	-0.303559	0.845057	TRUE			0.0731139
P26640	9	24	Valine--tRNA ligase OS=Homo sapiens OX=9606 GN=VARS1 PE=1 SV=4	VARS;VARS2	-0.422947	0.873645	TRUE			0.0586649
P29692	9	45	Elongation factor 1-delta OS=Homo sapiens OX=9606 GN=EEF1D PE=1 SV=5	EEF1D	-0.195112	0.909016	TRUE			0.0414284
P27348	9	36	14-3-3 protein theta OS=Homo sapiens OX=9606 GN=YWHAQ PE=1 SV=1	YWHAQ	-0.197352	0.918164	TRUE			0.03708
P52292	9	36	Importin subunit alpha-1 OS=Homo sapiens OX=9606 GN=KPNA2 PE=1 SV=1	KPNA2	0.119417	0.929299	TRUE			0.0318444
Q6P2Q9	9	22	Pre-mRNA-processing-splicing factor 8 OS=Homo sapiens OX=9606 GN=PRPF8 PE=1 SV=2	PRPF8	0.197945	0.93825	TRUE			0.0276816
Q9HCC0	9	27	Methylcrotonoyl-CoA carboxylase beta chain, mitochondrial OS=Homo sapiens OX=9606 GN=MCCC2 PE=1 SV=1	MCCC2	-0.122147	0.93825	TRUE			0.0276816
P22626	9	37	Heterogeneous nuclear ribonucleoproteins A2/B1 OS=Homo sapiens OX=9606 GN=HNRNPA2B1 PE=1 SV=2	HNRNPA2B1	0.173914	0.941894	TRUE			0.0259981
P35249	9	38	Replication factor C subunit 4 OS=Homo sapiens OX=9606 GN=RFC4 PE=1 SV=2	RFC4	-0.0737424	0.94708	TRUE			0.0236133
O96013	9	53	Serine/threonine-protein kinase PAK 4 OS=Homo sapiens OX=9606 GN=PAK4 PE=1 SV=1	PAK4	-0.0739917	0.950528	TRUE			0.022035
Q92615	9	35	La-related protein 4B OS=Homo sapiens OX=9606 GN=LARP4B PE=1 SV=3	LARP4B	-0.0853326	0.962388	TRUE			0.0166496
P63267	9	145	Actin, gamma-enteric smooth muscle OS=Homo sapiens OX=9606 GN=ACTG2 PE=1 SV=1	ACTG2	-0.0518674	0.966701	TRUE			0.0147079
E9PLK3	9	17	Aminopeptidase OS=Homo sapiens OX=9606 GN=NPEPPS PE=1 SV=1	NPEPPS	0.0787961	0.971727	TRUE			0.0124559
P21796	9	22	Voltage-dependent anion-selective channel protein 1 OS=Homo sapiens OX=9606 GN=VDAC1 PE=1 SV=2	VDAC1	-0.120097	0.972028	TRUE			0.0123214
P46013	9	19	Proliferation marker protein Ki-67 OS=Homo sapiens OX=9606 GN=MKI67 PE=1 SV=2	MKI67	-0.0529494	0.979288	TRUE			0.00908978
P09874	9	24	Poly [ADP-ribose] polymerase 1 OS=Homo sapiens OX=9606 GN=PARP1 PE=1 SV=4	PARP1	-0.102775	0.981447	TRUE			0.00813315
Q15029	9	28	116 kDa U5 small nuclear ribonucleoprotein component OS=Homo sapiens OX=9606 GN=EFTUD2 PE=1 SV=1	EFTUD2	-0.0156743	0.990284	TRUE			0.00424024
P49411	9	33	Elongation factor Tu, mitochondrial OS=Homo sapiens OX=9606 GN=TUFM PE=1 SV=2	TUFM	-0.00578903	0.996858	TRUE			0.00136653
P53621	9	23	Coatomer subunit alpha OS=Homo sapiens OX=9606 GN=COPA PE=1 SV=2	COPA	2.88641e-05	1	TRUE			0
F8W7U0	8	12	Intersectin-1 OS=Homo sapiens OX=9606 GN=ITSN1 PE=1 SV=1	ITSN1	5.25609	0.0847195	TRUE			1.07202
Q9BY44	8	22	Eukaryotic translation initiation factor 2A OS=Homo sapiens OX=9606 GN=EIF2A PE=1 SV=3	EIF2A	1.37722	0.108175	TRUE			0.965875
Q12965	8	27	Unconventional myosin-Ie OS=Homo sapiens OX=9606 GN=MYO1E PE=1 SV=2	MYO1E	2.47942	0.129415	TRUE			0.888016
Q6PJT7	8	18	Zinc finger CCCH domain-containing protein 14 OS=Homo sapiens OX=9606 GN=ZC3H14 PE=1 SV=1	ZC3H14	0.689022	0.282727	TRUE			0.548633
Q15147	8	23	1-phosphatidylinositol 4,5-bisphosphate phosphodiesterase beta-4 OS=Homo sapiens OX=9606 GN=PLCB4 PE=1 SV=3	PLCB4	1.42992	0.296144	TRUE			0.528497
P62269	8	54	40S ribosomal protein S18 OS=Homo sapiens OX=9606 GN=RPS18 PE=1 SV=3	RPS18	1.3517	0.311519	TRUE			0.506516
P00338	8	30	L-lactate dehydrogenase A chain OS=Homo sapiens OX=9606 GN=LDHA PE=1 SV=2	LDHA	-1.0524	0.312406	TRUE			0.50528
P62906	8	31	60S ribosomal protein L10a OS=Homo sapiens OX=9606 GN=RPL10A PE=1 SV=2	RPL10A	0.875321	0.337902	TRUE			0.47121
O43175	8	29	D-3-phosphoglycerate dehydrogenase OS=Homo sapiens OX=9606 GN=PHGDH PE=1 SV=4	PHGDH	-0.52366	0.344556	TRUE			0.46274
P25686	8	28	DnaJ homolog subfamily B member 2 OS=Homo sapiens OX=9606 GN=DNAJB2 PE=1 SV=3	DNAJB2	-0.799264	0.349415	TRUE			0.456658
Q8NEY1	8	20	Neuron navigator 1 OS=Homo sapiens OX=9606 GN=NAV1 PE=1 SV=2	NAV1	0.393327	0.407362	TRUE			0.390019
P18124	8	62	60S ribosomal protein L7 OS=Homo sapiens OX=9606 GN=RPL7 PE=1 SV=1	RPL7	1.07378	0.470354	TRUE			0.327575
Q8N3C0	8	19	Activating signal cointegrator 1 complex subunit 3 OS=Homo sapiens OX=9606 GN=ASCC3 PE=1 SV=3	ASCC3	0.803946	0.484465	TRUE			0.314738
Q96AE4	8	30	Far upstream element-binding protein 1 OS=Homo sapiens OX=9606 GN=FUBP1 PE=1 SV=3	FUBP1	-0.841548	0.521198	TRUE			0.282997
P63244	8	40	Receptor of activated protein C kinase 1 OS=Homo sapiens OX=9606 GN=RACK1 PE=1 SV=3	GNB2L1;RACK1	1.45513	0.542512	TRUE			0.265591
P55060	8	11	Exportin-2 OS=Homo sapiens OX=9606 GN=CSE1L PE=1 SV=3	CSE1L	-0.328249	0.600646	TRUE			0.221382
E9PCA1	8	14	T-complex protein 1 subunit epsilon OS=Homo sapiens OX=9606 GN=CCT5 PE=1 SV=1	CCT5	-1.29508	0.618115	TRUE			0.20893
Q9NYU1	8	21	UDP-glucose:glycoprotein glucosyltransferase 2 OS=Homo sapiens OX=9606 GN=UGGT2 PE=1 SV=4	UGGT2	-0.712886	0.628755	TRUE			0.201519
E9PGC8	8	12	Microtubule-associated protein 1A OS=Homo sapiens OX=9606 GN=MAP1A PE=1 SV=1	MAP1A	-3.2349	0.634732	TRUE			0.19741
P62701	8	48	40S ribosomal protein S4, X isoform OS=Homo sapiens OX=9606 GN=RPS4X PE=1 SV=2	RPS4X	1.11284	0.640963	TRUE			0.193167
O76031	8	27	ATP-dependent Clp protease ATP-binding subunit clpX-like, mitochondrial OS=Homo sapiens OX=9606 GN=CLPX PE=1 SV=2	CLPX	-0.202704	0.641305	TRUE			0.192935
P46779	8	21	60S ribosomal protein L28 OS=Homo sapiens OX=9606 GN=RPL28 PE=1 SV=3	RPL28	1.30056	0.649061	TRUE			0.187714
Q93008	8	28	Probable ubiquitin carboxyl-terminal hydrolase FAF-X OS=Homo sapiens OX=9606 GN=USP9X PE=1 SV=4		-0.504336	0.662786	TRUE			0.178627
E9PCY7	8	67	Heterogeneous nuclear ribonucleoprotein H OS=Homo sapiens OX=9606 GN=HNRNPH1 PE=1 SV=1	HNRNPH1	0.619953	0.669955	TRUE			0.173954
O14744	8	14	Protein arginine N-methyltransferase 5 OS=Homo sapiens OX=9606 GN=PRMT5 PE=1 SV=4	PRMT5	-1.63384	0.680902	TRUE			0.166915
P43490	8	33	Nicotinamide phosphoribosyltransferase OS=Homo sapiens OX=9606 GN=NAMPT PE=1 SV=1	NAMPT	0.62429	0.686081	TRUE			0.163624
B4DUR8	8	28	T-complex protein 1 subunit gamma OS=Homo sapiens OX=9606 GN=CCT3 PE=1 SV=1	CCT3	-0.497578	0.688586	TRUE			0.162042
Q9UPU7	8	17	TBC1 domain family member 2B OS=Homo sapiens OX=9606 GN=TBC1D2B PE=1 SV=2	TBC1D2B	0.422041	0.704101	TRUE			0.152365
P04843	8	27	Dolichyl-diphosphooligosaccharide--protein glycosyltransferase subunit 1 OS=Homo sapiens OX=9606 GN=RPN1 PE=1 SV=1	RPN1	0.372324	0.704101	TRUE			0.152365
A6NN50	8	25	Obscurin-like protein 1 OS=Homo sapiens OX=9606 GN=OBSL1 PE=1 SV=1		-0.387812	0.707763	TRUE			0.150112
Q9C0D5	8	23	Protein TANC1 OS=Homo sapiens OX=9606 GN=TANC1 PE=1 SV=3	TANC1	0.446614	0.713665	TRUE			0.146506
O75323	8	44	Protein NipSnap homolog 2 OS=Homo sapiens OX=9606 GN=NIPSNAP2 PE=1 SV=1	GBAS;NIPSNAP2	0.350594	0.713754	TRUE			0.146451
I3L2J8	8	23	Centrosomal protein of 131 kDa OS=Homo sapiens OX=9606 GN=CEP131 PE=1 SV=1	AZI1;CEP131	0.315628	0.720112	TRUE			0.1426
Q96P47	8	19	Arf-GAP with GTPase, ANK repeat and PH domain-containing protein 3 OS=Homo sapiens OX=9606 GN=AGAP3 PE=1 SV=2	AGAP3	-0.28663	0.726152	TRUE			0.138973
P46781	8	23	40S ribosomal protein S9 OS=Homo sapiens OX=9606 GN=RPS9 PE=1 SV=3	RPS9	0.915186	0.741321	TRUE			0.129993
P10398	8	18	Serine/threonine-protein kinase A-Raf OS=Homo sapiens OX=9606 GN=ARAF PE=1 SV=2	ARAF	-0.349394	0.743316	TRUE			0.128827
O75330	8	11	Hyaluronan mediated motility receptor OS=Homo sapiens OX=9606 GN=HMMR PE=1 SV=2	HMMR	-0.532907	0.759832	TRUE			0.119282
Q9UH99	8	34	SUN domain-containing protein 2 OS=Homo sapiens OX=9606 GN=SUN2 PE=1 SV=3	SUN2	-0.451426	0.760047	TRUE			0.119159
A0A087WWU8	8	17	Tropomyosin alpha-3 chain OS=Homo sapiens OX=9606 GN=TPM3 PE=1 SV=1	TPM3	-1.59226	0.760047	TRUE			0.119159
P52597	8	34	Heterogeneous nuclear ribonucleoprotein F OS=Homo sapiens OX=9606 GN=HNRNPF PE=1 SV=3	HNRNPF	-0.357936	0.770289	TRUE			0.113346
H7BXY3	8	19	RNA helicase OS=Homo sapiens OX=9606 GN=DHX30 PE=1 SV=1	DHX30	-1.25974	0.791554	TRUE			0.10152
Q9P2N5	8	17	RNA-binding protein 27 OS=Homo sapiens OX=9606 GN=RBM27 PE=1 SV=2	RBM27	0.127292	0.797321	TRUE			0.0983669
Q8WWM7	8	16	Ataxin-2-like protein OS=Homo sapiens OX=9606 GN=ATXN2L PE=1 SV=2	ATXN2L	-0.423578	0.797321	TRUE			0.0983669
Q0VDF9	8	11	Heat shock 70 kDa protein 14 OS=Homo sapiens OX=9606 GN=HSPA14 PE=1 SV=1	HSPA14	-1.60322	0.797917	TRUE			0.0980423
Q15582	8	35	Transforming growth factor-beta-induced protein ig-h3 OS=Homo sapiens OX=9606 GN=TGFBI PE=1 SV=1	TGFBI	0.331998	0.800252	TRUE			0.0967732
P13010	8	17	X-ray repair cross-complementing protein 5 OS=Homo sapiens OX=9606 GN=XRCC5 PE=1 SV=3	XRCC5	0.563202	0.808159	TRUE			0.0925032
Q14247	8	18	Src substrate cortactin OS=Homo sapiens OX=9606 GN=CTTN PE=1 SV=2	CTTN	-0.394182	0.817935	TRUE			0.087281
P49792	8	13	E3 SUMO-protein ligase RanBP2 OS=Homo sapiens OX=9606 GN=RANBP2 PE=1 SV=2	RANBP2	-0.735371	0.836206	TRUE			0.0776866
P12236	8	48	ADP/ATP translocase 3 OS=Homo sapiens OX=9606 GN=SLC25A6 PE=1 SV=4	SLC25A6	0.60213	0.836219	TRUE			0.0776797
B4DY09	8	37	Interleukin enhancer-binding factor 2 OS=Homo sapiens OX=9606 GN=ILF2 PE=1 SV=1	ILF2	0.552129	0.841233	TRUE			0.0750838
P46060	8	29	Ran GTPase-activating protein 1 OS=Homo sapiens OX=9606 GN=RANGAP1 PE=1 SV=1	RANGAP1	-0.121613	0.873582	TRUE			0.0586963
P32119	8	29	Peroxiredoxin-2 OS=Homo sapiens OX=9606 GN=PRDX2 PE=1 SV=5	PRDX2	-0.886485	0.873582	TRUE			0.0586963
O75970	8	19	Multiple PDZ domain protein OS=Homo sapiens OX=9606 GN=MPDZ PE=1 SV=2	MPDZ	0.379443	0.878039	TRUE			0.056486
P50570	8	17	Dynamin-2 OS=Homo sapiens OX=9606 GN=DNM2 PE=1 SV=2	DNM2	-0.144679	0.893005	TRUE			0.0491462
P42694	8	16	Probable helicase with zinc finger domain OS=Homo sapiens OX=9606 GN=HELZ PE=1 SV=2	HELZ	0.20904	0.905874	TRUE			0.0429322
Q9Y265	8	23	RuvB-like 1 OS=Homo sapiens OX=9606 GN=RUVBL1 PE=1 SV=1	RUVBL1	-0.242877	0.909016	TRUE			0.0414284
P41091	8	36	Eukaryotic translation initiation factor 2 subunit 3 OS=Homo sapiens OX=9606 GN=EIF2S3 PE=1 SV=3	EIF2S3	0.189323	0.922162	TRUE			0.0351929
P06756	8	23	Integrin alpha-V OS=Homo sapiens OX=9606 GN=ITGAV PE=1 SV=2	ITGAV	0.175649	0.92461	TRUE			0.0340416
P14868	8	24	Aspartate--tRNA ligase, cytoplasmic OS=Homo sapiens OX=9606 GN=DARS1 PE=1 SV=2	DARS	-0.130639	0.942197	TRUE			0.0258585
Q9NZB2	8	19	Constitutive coactivator of PPAR-gamma-like protein 1 OS=Homo sapiens OX=9606 GN=FAM120A PE=1 SV=2	FAM120A	0.149768	0.94708	TRUE			0.0236133
P56192	8	19	Methionine--tRNA ligase, cytoplasmic OS=Homo sapiens OX=9606 GN=MARS1 PE=1 SV=2	MARS	0.197231	0.95135	TRUE			0.0216597
Q9NYU2	8	19	UDP-glucose:glycoprotein glucosyltransferase 1 OS=Homo sapiens OX=9606 GN=UGGT1 PE=1 SV=3	UGGT1	0.0587417	0.9547	TRUE			0.0201332
O00231	8	21	26S proteasome non-ATPase regulatory subunit 11 OS=Homo sapiens OX=9606 GN=PSMD11 PE=1 SV=3	PSMD11	0.0384812	0.959519	TRUE			0.0179464
P30101	8	27	Protein disulfide-isomerase A3 OS=Homo sapiens OX=9606 GN=PDIA3 PE=1 SV=4	PDIA3	-0.101884	0.960083	TRUE			0.0176912
P15311	8	18	Ezrin OS=Homo sapiens OX=9606 GN=EZR PE=1 SV=4	EZR	-0.0772552	0.965231	TRUE			0.0153687
B5ME19	8	21	Eukaryotic translation initiation factor 3 subunit C-like protein OS=Homo sapiens OX=9606 GN=EIF3CL PE=1 SV=1	EIF3CL	0.0630548	0.97026	TRUE			0.0131117
P31689	8	51	DnaJ homolog subfamily A member 1 OS=Homo sapiens OX=9606 GN=DNAJA1 PE=1 SV=2	DNAJA1	0.0536593	0.979544	TRUE			0.00897612
O60664	8	31	Perilipin-3 OS=Homo sapiens OX=9606 GN=PLIN3 PE=1 SV=3	PLIN3	-0.014167	0.988388	TRUE			0.00507252
P22314	8	15	Ubiquitin-like modifier-activating enzyme 1 OS=Homo sapiens OX=9606 GN=UBA1 PE=1 SV=3	UBA1	0.0258032	0.988828	TRUE			0.0048792
Q9NTJ3	8	15	Structural maintenance of chromosomes protein 4 OS=Homo sapiens OX=9606 GN=SMC4 PE=1 SV=2	SMC4	0.0145714	0.98919	TRUE			0.00472046
Q13625	8	25	Apoptosis-stimulating of p53 protein 2 OS=Homo sapiens OX=9606 GN=TP53BP2 PE=1 SV=2	TP53BP2	0.00743378	0.989497	TRUE			0.00458536
Q02878	7	22	60S ribosomal protein L6 OS=Homo sapiens OX=9606 GN=RPL6 PE=1 SV=3	RPL6	1.28616	0.269742	TRUE			0.569052
Q86VM9	7	22	Zinc finger CCCH domain-containing protein 18 OS=Homo sapiens OX=9606 GN=ZC3H18 PE=1 SV=2	ZC3H18	1.25786	0.288715	TRUE			0.539531
Q86UE4	7	29	Protein LYRIC OS=Homo sapiens OX=9606 GN=MTDH PE=1 SV=2	MTDH	1.105	0.315596	TRUE			0.500869
A0A6I8PTT9	7	24	Glutamine--fructose-6-phosphate transaminase (isomerizing) OS=Homo sapiens OX=9606 GN=GFPT1 PE=1 SV=1		0.86405	0.330949	TRUE			0.480239
Q9Y5V3	7	18	Melanoma-associated antigen D1 OS=Homo sapiens OX=9606 GN=MAGED1 PE=1 SV=3	MAGED1	0.529537	0.33276	TRUE			0.477869
P51812	7	21	Ribosomal protein S6 kinase alpha-3 OS=Homo sapiens OX=9606 GN=RPS6KA3 PE=1 SV=1	RPS6KA3	0.773841	0.342729	TRUE			0.465049
H7BY10	7	30	60S ribosomal protein L23a (Fragment) OS=Homo sapiens OX=9606 GN=RPL23A PE=1 SV=1		1.49322	0.345457	TRUE			0.461606
Q13423	7	16	NAD(P) transhydrogenase, mitochondrial OS=Homo sapiens OX=9606 GN=NNT PE=1 SV=3	NNT	0.470436	0.348034	TRUE			0.458378
Q08397	7	35	Lysyl oxidase homolog 1 OS=Homo sapiens OX=9606 GN=LOXL1 PE=1 SV=2	LOXL1	-0.821617	0.35385	TRUE			0.45118
P25685	7	26	DnaJ homolog subfamily B member 1 OS=Homo sapiens OX=9606 GN=DNAJB1 PE=1 SV=4	DNAJB1	-0.646713	0.381816	TRUE			0.418146
H0Y412	7	33	Protein PRRC2B (Fragment) OS=Homo sapiens OX=9606 GN=PRRC2B PE=1 SV=1		0.778652	0.40514	TRUE			0.392395
A0A0A0MSA4	7	23	Band 4.1-like protein 3 OS=Homo sapiens OX=9606 GN=EPB41L3 PE=1 SV=1		0.911979	0.407362	TRUE			0.390019
Q14676	7	7	Mediator of DNA damage checkpoint protein 1 OS=Homo sapiens OX=9606 GN=MDC1 PE=1 SV=3	MDC1	-2.70085	0.459149	TRUE			0.338046
Q8TF72	7	14	Protein Shroom3 OS=Homo sapiens OX=9606 GN=SHROOM3 PE=1 SV=2	SHROOM3	-1.1943	0.549119	TRUE			0.260333
Q9UBS4	7	29	DnaJ homolog subfamily B member 11 OS=Homo sapiens OX=9606 GN=DNAJB11 PE=1 SV=1	DNAJB11	-0.577849	0.55785	TRUE			0.253483
P26373	7	31	60S ribosomal protein L13 OS=Homo sapiens OX=9606 GN=RPL13 PE=1 SV=4	RPL13	1.04202	0.57546	TRUE			0.239985
Q2TB90	7	22	Hexokinase HKDC1 OS=Homo sapiens OX=9606 GN=HKDC1 PE=1 SV=3	HKDC1	-0.567093	0.600646	TRUE			0.221382
Q13283	7	65	Ras GTPase-activating protein-binding protein 1 OS=Homo sapiens OX=9606 GN=G3BP1 PE=1 SV=1	G3BP1	0.33407	0.612362	TRUE			0.212991
O60506	7	37	Heterogeneous nuclear ribonucleoprotein Q OS=Homo sapiens OX=9606 GN=SYNCRIP PE=1 SV=2	SYNCRIP	0.494308	0.634732	TRUE			0.19741
Q9Y4W6	7	18	AFG3-like protein 2 OS=Homo sapiens OX=9606 GN=AFG3L2 PE=1 SV=2	AFG3L2	0.433982	0.659927	TRUE			0.180504
P53007	7	48	Tricarboxylate transport protein, mitochondrial OS=Homo sapiens OX=9606 GN=SLC25A1 PE=1 SV=2	SLC25A1	0.857004	0.679563	TRUE			0.16777
P62258	7	47	14-3-3 protein epsilon OS=Homo sapiens OX=9606 GN=YWHAE PE=1 SV=1	YWHAE	0.19436	0.685669	TRUE			0.163886
M0R210	7	30	40S ribosomal protein S16 OS=Homo sapiens OX=9606 GN=RPS16 PE=1 SV=1	RPS16	1.34406	0.734047	TRUE			0.134276
Q9Y305	7	29	Acyl-coenzyme A thioesterase 9, mitochondrial OS=Homo sapiens OX=9606 GN=ACOT9 PE=1 SV=2	ACOT9	0.501312	0.734286	TRUE			0.134135
A0A5F9ZHM4	7	26	L-lactate dehydrogenase OS=Homo sapiens OX=9606 GN=LDHB PE=1 SV=1		-0.654701	0.734286	TRUE			0.134135
Q53H96	7	66	Pyrroline-5-carboxylate reductase 3 OS=Homo sapiens OX=9606 GN=PYCR3 PE=1 SV=3	PYCRL;PYCR3	-0.374068	0.737492	TRUE			0.132243
Q6ZW31	7	29	Rho GTPase-activating protein SYDE1 OS=Homo sapiens OX=9606 GN=SYDE1 PE=1 SV=1	SYDE1	-0.237565	0.738513	TRUE			0.131642
Q14008	7	12	Cytoskeleton-associated protein 5 OS=Homo sapiens OX=9606 GN=CKAP5 PE=1 SV=3	CKAP5	-0.366214	0.740116	TRUE			0.1307
Q92973	7	19	Transportin-1 OS=Homo sapiens OX=9606 GN=TNPO1 PE=1 SV=2	TNPO1	0.473042	0.743316	TRUE			0.128827
P62753	7	21	40S ribosomal protein S6 OS=Homo sapiens OX=9606 GN=RPS6 PE=1 SV=1	RPS6	0.736821	0.754535	TRUE			0.122321
P62829	7	127	60S ribosomal protein L23 OS=Homo sapiens OX=9606 GN=RPL23 PE=1 SV=1	RPL23	0.553097	0.754535	TRUE			0.122321
Q00587	7	42	Cdc42 effector protein 1 OS=Homo sapiens OX=9606 GN=CDC42EP1 PE=1 SV=1	CDC42EP1	0.396654	0.755075	TRUE			0.12201
Q96DF8	7	24	Splicing factor ESS-2 homolog OS=Homo sapiens OX=9606 GN=ESS2 PE=1 SV=1	DGCR14;ESS2	0.537767	0.757929	TRUE			0.120372
P35658	7	12	Nuclear pore complex protein Nup214 OS=Homo sapiens OX=9606 GN=NUP214 PE=1 SV=2	NUP214	-0.592273	0.764838	TRUE			0.116431
O43464	7	30	Serine protease HTRA2, mitochondrial OS=Homo sapiens OX=9606 GN=HTRA2 PE=1 SV=2	HTRA2	0.572549	0.779061	TRUE			0.108428
B4DLN1	7	25	cDNA FLJ60124, highly similar to Mitochondrial dicarboxylate carrier OS=Homo sapiens OX=9606 PE=2 SV=1		0.704808	0.779974	TRUE			0.10792
P12004	7	16	Proliferating cell nuclear antigen OS=Homo sapiens OX=9606 GN=PCNA PE=1 SV=1	PCNA	-0.41315	0.779974	TRUE			0.10792
Q9ULV4	7	26	Coronin-1C OS=Homo sapiens OX=9606 GN=CORO1C PE=1 SV=1	CORO1C	-0.639781	0.78291	TRUE			0.106288
O75534	7	19	Cold shock domain-containing protein E1 OS=Homo sapiens OX=9606 GN=CSDE1 PE=1 SV=2	CSDE1	0.211079	0.790262	TRUE			0.102229
Q13045	7	27	Protein flightless-1 homolog OS=Homo sapiens OX=9606 GN=FLII PE=1 SV=2	FLII	0.337848	0.797321	TRUE			0.0983669
Q9HAS0	7	22	Protein Njmu-R1 OS=Homo sapiens OX=9606 GN=C17orf75 PE=1 SV=2	C17orf75	0.333675	0.797321	TRUE			0.0983669
Q13085	7	10	Acetyl-CoA carboxylase 1 OS=Homo sapiens OX=9606 GN=ACACA PE=1 SV=2	ACACA	-0.61768	0.797321	TRUE			0.0983669
E9PKG1	7	10	Protein arginine N-methyltransferase 1 OS=Homo sapiens OX=9606 GN=PRMT1 PE=1 SV=1		-0.941491	0.797917	TRUE			0.0980423
A0A1B0GVD5	7	25	Cathepsin D OS=Homo sapiens OX=9606 GN=CTSD PE=1 SV=1		0.365222	0.805591	TRUE			0.0938855
P13489	7	39	Ribonuclease inhibitor OS=Homo sapiens OX=9606 GN=RNH1 PE=1 SV=2	RNH1	0.200277	0.808159	TRUE			0.0925032
Q14683	7	19	Structural maintenance of chromosomes protein 1A OS=Homo sapiens OX=9606 GN=SMC1A PE=1 SV=2	SMC1A	0.214107	0.812232	TRUE			0.0903201
P61964	7	22	WD repeat-containing protein 5 OS=Homo sapiens OX=9606 GN=WDR5 PE=1 SV=1	WDR5	-0.185523	0.812348	TRUE			0.0902581
P40926	7	18	Malate dehydrogenase, mitochondrial OS=Homo sapiens OX=9606 GN=MDH2 PE=1 SV=3	MDH2	-1.0517	0.823837	TRUE			0.0841587
Q96H55	7	19	Unconventional myosin-XIX OS=Homo sapiens OX=9606 GN=MYO19 PE=1 SV=2	MYO19	0.14204	0.832166	TRUE			0.0797899
Q9NR30	7	17	Nucleolar RNA helicase 2 OS=Homo sapiens OX=9606 GN=DDX21 PE=1 SV=5	DDX21	0.439365	0.838006	TRUE			0.0767528
Q68CZ2	7	21	Tensin-3 OS=Homo sapiens OX=9606 GN=TNS3 PE=1 SV=2	TNS3	0.324556	0.844185	TRUE			0.0735625
I1E4Y6	7	29	GRB10-interacting GYF protein 2 OS=Homo sapiens OX=9606 GN=GIGYF2 PE=1 SV=1		-0.0954041	0.87956	TRUE			0.0557346
P39060	7	28	Collagen alpha-1(XVIII) chain OS=Homo sapiens OX=9606 GN=COL18A1 PE=1 SV=5	COL18A1	0.164952	0.884506	TRUE			0.0532992
P16615	7	24	Sarcoplasmic/endoplasmic reticulum calcium ATPase 2 OS=Homo sapiens OX=9606 GN=ATP2A2 PE=1 SV=1	ATP2A2	-0.203924	0.886065	TRUE			0.0525346
P48047	7	40	ATP synthase subunit O, mitochondrial OS=Homo sapiens OX=9606 GN=ATP5PO PE=1 SV=1	ATP5O	-0.178085	0.894701	TRUE			0.0483222
P98160	7	12	Basement membrane-specific heparan sulfate proteoglycan core protein OS=Homo sapiens OX=9606 GN=HSPG2 PE=1 SV=4	HSPG2	-0.259024	0.897861	TRUE			0.0467908
Q8TDX7	7	20	Serine/threonine-protein kinase Nek7 OS=Homo sapiens OX=9606 GN=NEK7 PE=1 SV=1	NEK7	-0.299095	0.901756	TRUE			0.0449107
A0A0J9YX62	7	36	DnaJ homolog subfamily B member 6 OS=Homo sapiens OX=9606 GN=DNAJB6 PE=1 SV=1	DNAJB6	0.30446	0.902071	TRUE			0.0447594
Q8TER5	7	14	Rho guanine nucleotide exchange factor 40 OS=Homo sapiens OX=9606 GN=ARHGEF40 PE=1 SV=3	ARHGEF40	0.182141	0.902071	TRUE			0.0447594
P35232	7	24	Prohibitin OS=Homo sapiens OX=9606 GN=PHB PE=1 SV=1	PHB	0.208096	0.902337	TRUE			0.0446312
Q9BPW8	7	57	Protein NipSnap homolog 1 OS=Homo sapiens OX=9606 GN=NIPSNAP1 PE=1 SV=1	NIPSNAP1	0.21646	0.909016	TRUE			0.0414284
Q96IJ6	7	44	Mannose-1-phosphate guanyltransferase alpha OS=Homo sapiens OX=9606 GN=GMPPA PE=1 SV=1	GMPPA	-0.10691	0.909016	TRUE			0.0414284
Q5JPH6	7	13	Probable glutamate--tRNA ligase, mitochondrial OS=Homo sapiens OX=9606 GN=EARS2 PE=1 SV=2	EARS2	0.105375	0.918385	TRUE			0.0369751
P04083	7	13	Annexin A1 OS=Homo sapiens OX=9606 GN=ANXA1 PE=1 SV=2	ANXA1	-0.425087	0.922162	TRUE			0.0351929
P24928	7	12	DNA-directed RNA polymerase II subunit RPB1 OS=Homo sapiens OX=9606 GN=POLR2A PE=1 SV=2	POLR2A	-0.326739	0.923566	TRUE			0.0345321
Q8IXB1	7	21	DnaJ homolog subfamily C member 10 OS=Homo sapiens OX=9606 GN=DNAJC10 PE=1 SV=2	DNAJC10	0.0844315	0.934287	TRUE			0.0295198
Q13310	7	27	Polyadenylate-binding protein 4 OS=Homo sapiens OX=9606 GN=PABPC4 PE=1 SV=1	PABPC4	-0.13511	0.93825	TRUE			0.0276816
Q9P258	7	7	Protein RCC2 OS=Homo sapiens OX=9606 GN=RCC2 PE=1 SV=2	RCC2	-0.880441	0.93825	TRUE			0.0276816
P26196	7	28	Probable ATP-dependent RNA helicase DDX6 OS=Homo sapiens OX=9606 GN=DDX6 PE=1 SV=2	DDX6	-0.160024	0.939689	TRUE			0.0270158
O00116	7	15	Alkyldihydroxyacetonephosphate synthase, peroxisomal OS=Homo sapiens OX=9606 GN=AGPS PE=1 SV=1	AGPS	-0.199779	0.942197	TRUE			0.0258585
Q6PKG0	7	18	La-related protein 1 OS=Homo sapiens OX=9606 GN=LARP1 PE=1 SV=2	LARP1	0.116429	0.942439	TRUE			0.0257466
Q9Y5X2	7	28	Sorting nexin-8 OS=Homo sapiens OX=9606 GN=SNX8 PE=1 SV=1	SNX8	0.0971925	0.943324	TRUE			0.025339
Q15654	7	28	Thyroid receptor-interacting protein 6 OS=Homo sapiens OX=9606 GN=TRIP6 PE=1 SV=3	TRIP6	-0.115606	0.959519	TRUE			0.0179464
Q9Y224	7	41	RNA transcription, translation and transport factor protein OS=Homo sapiens OX=9606 GN=RTRAF PE=1 SV=1	C14orf166;RTRAF	0.0800853	0.961689	TRUE			0.0169655
P26641	7	23	Elongation factor 1-gamma OS=Homo sapiens OX=9606 GN=EEF1G PE=1 SV=3	EEF1G	-0.071392	0.962126	TRUE			0.0167679
Q12931	7	13	Heat shock protein 75 kDa, mitochondrial OS=Homo sapiens OX=9606 GN=TRAP1 PE=1 SV=3	TRAP1	0.0871517	0.964667	TRUE			0.0156226
P31946	7	29	14-3-3 protein beta/alpha OS=Homo sapiens OX=9606 GN=YWHAB PE=1 SV=3	YWHAB	-0.173077	0.967018	TRUE			0.0145653
O15355	7	13	Protein phosphatase 1G OS=Homo sapiens OX=9606 GN=PPM1G PE=1 SV=1	PPM1G	0.105076	0.97026	TRUE			0.0131117
P07237	7	20	Protein disulfide-isomerase OS=Homo sapiens OX=9606 GN=P4HB PE=1 SV=3	P4HB	-0.0250982	0.97026	TRUE			0.0131117
P12931	7	17	Proto-oncogene tyrosine-protein kinase Src OS=Homo sapiens OX=9606 GN=SRC PE=1 SV=3	SRC	0.0406937	0.972028	TRUE			0.0123214
P40937	7	17	Replication factor C subunit 5 OS=Homo sapiens OX=9606 GN=RFC5 PE=1 SV=1	RFC5	0.0684089	0.972504	TRUE			0.0121087
Q9Y262	7	24	Eukaryotic translation initiation factor 3 subunit L OS=Homo sapiens OX=9606 GN=EIF3L PE=1 SV=1	EIF3L	-0.0531598	0.972974	TRUE			0.0118987
Q15233	7	30	Non-POU domain-containing octamer-binding protein OS=Homo sapiens OX=9606 GN=NONO PE=1 SV=4	NONO	-0.0834396	0.97377	TRUE			0.0115436
P50454	7	38	Serpin H1 OS=Homo sapiens OX=9606 GN=SERPINH1 PE=1 SV=2	SERPINH1	0.0399746	0.974982	TRUE			0.0110036
Q01082	7	24	Spectrin beta chain, non-erythrocytic 1 OS=Homo sapiens OX=9606 GN=SPTBN1 PE=1 SV=2	SPTBN1	-0.0119974	0.984307	TRUE			0.00686927
Q5VTI5	7	17	Pleckstrin homology domain-containing family A member 6 OS=Homo sapiens OX=9606 GN=PLEKHA6 PE=1 SV=1	PLEKHA6	0.00940746	0.988828	TRUE			0.0048792
O00410	7	15	Importin-5 OS=Homo sapiens OX=9606 GN=IPO5 PE=1 SV=4	IPO5	0.00782583	0.988828	TRUE			0.0048792
P12235	7	25	ADP/ATP translocase 1 OS=Homo sapiens OX=9606 GN=SLC25A4 PE=1 SV=4	SLC25A4	-0.0486501	0.988828	TRUE			0.0048792
A0A0A0MTH9	6	8	TATA-binding protein-associated factor 172 OS=Homo sapiens OX=9606 GN=BTAF1 PE=1 SV=1		-0.518099	0.127535	TRUE			0.89437
O00391	6	22	Sulfhydryl oxidase 1 OS=Homo sapiens OX=9606 GN=QSOX1 PE=1 SV=3	QSOX1	-0.567889	0.211206	TRUE			0.675294
Q9NSY1	6	13	BMP-2-inducible protein kinase OS=Homo sapiens OX=9606 GN=BMP2K PE=1 SV=2	BMP2K	2.5886	0.22132	TRUE			0.65498
M0R0P8	6	7	Unconventional myosin-IXb OS=Homo sapiens OX=9606 GN=MYO9B PE=1 SV=1		1.18718	0.238521	TRUE			0.622474
P60174	6	20	Triosephosphate isomerase OS=Homo sapiens OX=9606 GN=TPI1 PE=1 SV=4	TPI1	-1.20857	0.273452	TRUE			0.563119
B4DY08	6	46	Heterogeneous nuclear ribonucleoproteins C1/C2 OS=Homo sapiens OX=9606 GN=HNRNPC PE=1 SV=1	HNRNPC	-0.86267	0.337902	TRUE			0.47121
Q9P270	6	12	SLAIN motif-containing protein 2 OS=Homo sapiens OX=9606 GN=SLAIN2 PE=1 SV=2	SLAIN2	-0.989689	0.338888	TRUE			0.469944
Q71RC2	6	15	La-related protein 4 OS=Homo sapiens OX=9606 GN=LARP4 PE=1 SV=3	LARP4	1.15916	0.348034	TRUE			0.458378
E9PB90	6	8	Hexokinase OS=Homo sapiens OX=9606 GN=HK2 PE=1 SV=1		-2.75911	0.348034	TRUE			0.458378
A0A0C4DGA7	6	13	Actin-binding LIM protein 3 OS=Homo sapiens OX=9606 GN=ABLIM3 PE=1 SV=1	ABLIM3	0.907061	0.385083	TRUE			0.414446
P62917	6	20	60S ribosomal protein L8 OS=Homo sapiens OX=9606 GN=RPL8 PE=1 SV=2	RPL8	1.18792	0.424313	TRUE			0.372314
P30050	6	63	60S ribosomal protein L12 OS=Homo sapiens OX=9606 GN=RPL12 PE=1 SV=1	RPL12	0.636135	0.425387	TRUE			0.371216
P22061	6	24	Protein-L-isoaspartate(D-aspartate) O-methyltransferase OS=Homo sapiens OX=9606 GN=PCMT1 PE=1 SV=4	PCMT1	-0.73602	0.425387	TRUE			0.371216
O43390	6	26	Heterogeneous nuclear ribonucleoprotein R OS=Homo sapiens OX=9606 GN=HNRNPR PE=1 SV=1	HNRNPR	1.51018	0.434233	TRUE			0.362278
O60488	6	20	Long-chain-fatty-acid--CoA ligase 4 OS=Homo sapiens OX=9606 GN=ACSL4 PE=1 SV=2	ACSL4	-0.630917	0.439513	TRUE			0.357029
Q9BUJ2	6	21	Heterogeneous nuclear ribonucleoprotein U-like protein 1 OS=Homo sapiens OX=9606 GN=HNRNPUL1 PE=1 SV=2	HNRNPUL1	0.524959	0.446092	TRUE			0.350575
P40429	6	24	60S ribosomal protein L13a OS=Homo sapiens OX=9606 GN=RPL13A PE=1 SV=2	RPL13A	1.24298	0.453677	TRUE			0.343253
Q96I24	6	10	Far upstream element-binding protein 3 OS=Homo sapiens OX=9606 GN=FUBP3 PE=1 SV=2	FUBP3	-0.214296	0.459149	TRUE			0.338046
A0A2R8Y6J3	6	21	60S ribosomal protein L5 (Fragment) OS=Homo sapiens OX=9606 GN=RPL5 PE=1 SV=1		1.44153	0.460478	TRUE			0.336791
Q96AG4	6	24	Leucine-rich repeat-containing protein 59 OS=Homo sapiens OX=9606 GN=LRRC59 PE=1 SV=1	LRRC59	1.54255	0.484465	TRUE			0.314738
Q8NFC6	6	7	Biorientation of chromosomes in cell division protein 1-like 1 OS=Homo sapiens OX=9606 GN=BOD1L1 PE=1 SV=2	BOD1L1	-3.0412	0.504307	TRUE			0.297305
O43148	6	21	mRNA cap guanine-N7 methyltransferase OS=Homo sapiens OX=9606 GN=RNMT PE=1 SV=1	RNMT	-0.621543	0.512286	TRUE			0.290488
Q6UN15	6	27	Pre-mRNA 3'-end-processing factor FIP1 OS=Homo sapiens OX=9606 GN=FIP1L1 PE=1 SV=1	FIP1L1	0.556	0.514611	TRUE			0.288521
P51116	6	10	Fragile X mental retardation syndrome-related protein 2 OS=Homo sapiens OX=9606 GN=FXR2 PE=1 SV=2	FXR2	1.37461	0.519665	TRUE			0.284276
J3QQQ9	6	25	KOW domain-containing protein OS=Homo sapiens OX=9606 PE=3 SV=1		1.34962	0.51979	TRUE			0.284172
Q15942	6	24	Zyxin OS=Homo sapiens OX=9606 GN=ZYX PE=1 SV=1	ZYX	-1.635	0.53782	TRUE			0.269363
P55795	6	33	Heterogeneous nuclear ribonucleoprotein H2 OS=Homo sapiens OX=9606 GN=HNRNPH2 PE=1 SV=1	HNRNPH2	1.04037	0.546457	TRUE			0.262444
P39023	6	21	60S ribosomal protein L3 OS=Homo sapiens OX=9606 GN=RPL3 PE=1 SV=2	RPL3	0.876852	0.546898	TRUE			0.262093
P16401	6	9	Histone H1.5 OS=Homo sapiens OX=9606 GN=H1-5 PE=1 SV=3	HIST1H1B	-4.0708	0.546898	TRUE			0.262093
Q08945	6	10	FACT complex subunit SSRP1 OS=Homo sapiens OX=9606 GN=SSRP1 PE=1 SV=1	SSRP1	0.651514	0.55773	TRUE			0.253576
Q9Y4B5	6	12	Microtubule cross-linking factor 1 OS=Homo sapiens OX=9606 GN=MTCL1 PE=1 SV=5	SOGA2;MTCL1	0.911734	0.566012	TRUE			0.247174
O94906	6	14	Pre-mRNA-processing factor 6 OS=Homo sapiens OX=9606 GN=PRPF6 PE=1 SV=1	PRPF6	0.361876	0.573596	TRUE			0.241394
Q9NZI8	6	6	Insulin-like growth factor 2 mRNA-binding protein 1 OS=Homo sapiens OX=9606 GN=IGF2BP1 PE=1 SV=2	IGF2BP1	-2.94234	0.582527	TRUE			0.234684
V9GYM8	6	20	Guanine nucleotide exchange factor H1 OS=Homo sapiens OX=9606 GN=ARHGEF2 PE=1 SV=1		0.458242	0.584783	TRUE			0.233006
Q32MZ4	6	8	Leucine-rich repeat flightless-interacting protein 1 OS=Homo sapiens OX=9606 GN=LRRFIP1 PE=1 SV=2	LRRFIP1	-1.64445	0.615183	TRUE			0.210996
K7EIH8	6	23	DnaJ homolog subfamily C member 7 (Fragment) OS=Homo sapiens OX=9606 GN=DNAJC7 PE=1 SV=9		-0.966273	0.619955	TRUE			0.20764
Q14558	6	13	Phosphoribosyl pyrophosphate synthase-associated protein 1 OS=Homo sapiens OX=9606 GN=PRPSAP1 PE=1 SV=2	PRPSAP1	0.691133	0.634732	TRUE			0.19741
Q96Q05	6	18	Trafficking protein particle complex subunit 9 OS=Homo sapiens OX=9606 GN=TRAPPC9 PE=1 SV=2	TRAPPC9	0.489879	0.634732	TRUE			0.19741
O43294	6	16	Transforming growth factor beta-1-induced transcript 1 protein OS=Homo sapiens OX=9606 GN=TGFB1I1 PE=1 SV=2	TGFB1I1	-0.71663	0.634732	TRUE			0.19741
Q5QNW6	6	46	Histone H2B type 2-F OS=Homo sapiens OX=9606 GN=H2BC18 PE=1 SV=3	HIST2H2BF	1.96746	0.641739	TRUE			0.192642
O60313	6	6	Dynamin-like 120 kDa protein, mitochondrial OS=Homo sapiens OX=9606 GN=OPA1 PE=1 SV=3	OPA1	0.614129	0.641739	TRUE			0.192642
E9PHS0	6	23	Glutathione S-transferase LANCL1 (Fragment) OS=Homo sapiens OX=9606 GN=LANCL1 PE=1 SV=1		0.320295	0.653553	TRUE			0.184719
O94819	6	17	Kelch repeat and BTB domain-containing protein 11 OS=Homo sapiens OX=9606 GN=KBTBD11 PE=1 SV=1	KBTBD11	0.892634	0.670967	TRUE			0.173299
B4DDF4	6	25	Calponin OS=Homo sapiens OX=9606 GN=CNN2 PE=1 SV=1	CNN2	-1.17821	0.670967	TRUE			0.173299
H0YHA7	6	33	60S ribosomal protein L18 (Fragment) OS=Homo sapiens OX=9606 GN=RPL18 PE=1 SV=1		0.999506	0.671096	TRUE			0.173215
Q15181	6	6	Inorganic pyrophosphatase OS=Homo sapiens OX=9606 GN=PPA1 PE=1 SV=2	PPA1	-3.42895	0.675474	TRUE			0.170391
P35580	6	9	Myosin-10 OS=Homo sapiens OX=9606 GN=MYH10 PE=1 SV=3	MYH10	-1.7086	0.67883	TRUE			0.168239
E9PBS1	6	13	AIR carboxylase (Fragment) OS=Homo sapiens OX=9606 GN=PAICS PE=1 SV=1		-1.71142	0.679563	TRUE			0.16777
A0A087WZ13	6	18	Ribonucleoprotein PTB-binding 1 OS=Homo sapiens OX=9606 GN=RAVER1 PE=1 SV=1		-0.459163	0.697125	TRUE			0.156689
Q7Z3T8	6	7	Zinc finger FYVE domain-containing protein 16 OS=Homo sapiens OX=9606 GN=ZFYVE16 PE=1 SV=3	ZFYVE16	-2.09603	0.715733	TRUE			0.145249
P62277	6	39	40S ribosomal protein S13 OS=Homo sapiens OX=9606 GN=RPS13 PE=1 SV=2	RPS13	0.892875	0.715936	TRUE			0.145126
P98170	6	18	E3 ubiquitin-protein ligase XIAP OS=Homo sapiens OX=9606 GN=XIAP PE=1 SV=2	XIAP	0.342592	0.717554	TRUE			0.144146
P62241	6	32	40S ribosomal protein S8 OS=Homo sapiens OX=9606 GN=RPS8 PE=1 SV=2	RPS8	1.34472	0.730401	TRUE			0.136439
Q8IZH2	6	12	5'-3' exoribonuclease 1 OS=Homo sapiens OX=9606 GN=XRN1 PE=1 SV=1	XRN1	0.894966	0.730401	TRUE			0.136439
P50402	6	22	Emerin OS=Homo sapiens OX=9606 GN=EMD PE=1 SV=1	EMD	-0.273647	0.730401	TRUE			0.136439
Q14974	6	21	Importin subunit beta-1 OS=Homo sapiens OX=9606 GN=KPNB1 PE=1 SV=2	KPNB1	-0.172534	0.737492	TRUE			0.132243
P57723	6	13	Poly(rC)-binding protein 4 OS=Homo sapiens OX=9606 GN=PCBP4 PE=2 SV=1	PCBP4	-0.322365	0.750493	TRUE			0.124654
Q13217	6	19	DnaJ homolog subfamily C member 3 OS=Homo sapiens OX=9606 GN=DNAJC3 PE=1 SV=1	DNAJC3	-0.381695	0.750549	TRUE			0.124621
E7EX17	6	7	Eukaryotic translation initiation factor 4B OS=Homo sapiens OX=9606 GN=EIF4B PE=1 SV=1	EIF4B	-1.43347	0.752359	TRUE			0.123575
Q14694	6	11	Ubiquitin carboxyl-terminal hydrolase 10 OS=Homo sapiens OX=9606 GN=USP10 PE=1 SV=2	USP10	-0.582911	0.754535	TRUE			0.122321
P45974	6	19	Ubiquitin carboxyl-terminal hydrolase 5 OS=Homo sapiens OX=9606 GN=USP5 PE=1 SV=2	USP5	-0.263526	0.760047	TRUE			0.119159
P12270	6	6	Nucleoprotein TPR OS=Homo sapiens OX=9606 GN=TPR PE=1 SV=3	TPR	-1.07345	0.760866	TRUE			0.118692
P16949	6	9	Stathmin OS=Homo sapiens OX=9606 GN=STMN1 PE=1 SV=3	STMN1	-1.31483	0.770289	TRUE			0.113346
Q14318	6	13	Peptidyl-prolyl cis-trans isomerase FKBP8 OS=Homo sapiens OX=9606 GN=FKBP8 PE=1 SV=2	FKBP8	-0.821868	0.777643	TRUE			0.10922
Q9BY77	6	27	Polymerase delta-interacting protein 3 OS=Homo sapiens OX=9606 GN=POLDIP3 PE=1 SV=2	POLDIP3	-0.215903	0.780067	TRUE			0.107868
Q96KR1	6	8	Zinc finger RNA-binding protein OS=Homo sapiens OX=9606 GN=ZFR PE=1 SV=2	ZFR	-0.813949	0.783029	TRUE			0.106222
H3BRS1	6	7	Nuclear factor of-activated T-cells, cytoplasmic 3 (Fragment) OS=Homo sapiens OX=9606 GN=NFATC3 PE=1 SV=1		-1.56973	0.783029	TRUE			0.106222
Q15417	6	27	Calponin-3 OS=Homo sapiens OX=9606 GN=CNN3 PE=1 SV=1	CNN3	-0.337502	0.790262	TRUE			0.102229
P35998	6	20	26S proteasome regulatory subunit 7 OS=Homo sapiens OX=9606 GN=PSMC2 PE=1 SV=3	PSMC2	-0.370732	0.790262	TRUE			0.102229
Q9Y5B9	6	12	FACT complex subunit SPT16 OS=Homo sapiens OX=9606 GN=SUPT16H PE=1 SV=1	SUPT16H	0.823196	0.800591	TRUE			0.0965891
G5EA06	6	20	28S ribosomal protein S27, mitochondrial OS=Homo sapiens OX=9606 GN=MRPS27 PE=1 SV=1	MRPS27	0.330083	0.806686	TRUE			0.0932953
Q86YP4	6	11	Transcriptional repressor p66-alpha OS=Homo sapiens OX=9606 GN=GATAD2A PE=1 SV=1	GATAD2A	-0.385795	0.813553	TRUE			0.089614
P61221	6	8	ATP-binding cassette sub-family E member 1 OS=Homo sapiens OX=9606 GN=ABCE1 PE=1 SV=1	ABCE1	-0.565246	0.820172	TRUE			0.0860953
Q08380	6	27	Galectin-3-binding protein OS=Homo sapiens OX=9606 GN=LGALS3BP PE=1 SV=1	LGALS3BP	-0.179431	0.831559	TRUE			0.0801071
A0A6Q8PFF7	6	9	Chloride channel CLIC-like protein 1 OS=Homo sapiens OX=9606 GN=CLCC1 PE=4 SV=1		-1.79009	0.834838	TRUE			0.078398
Q8TAF3	6	20	WD repeat-containing protein 48 OS=Homo sapiens OX=9606 GN=WDR48 PE=1 SV=1	WDR48	-0.321895	0.835602	TRUE			0.0780005
E9PM19	6	23	Tyrosine-protein kinase OS=Homo sapiens OX=9606 GN=TYK2 PE=1 SV=1		-0.249218	0.840341	TRUE			0.0755446
E9PL69	6	10	Ribonucleoside-diphosphate reductase large subunit OS=Homo sapiens OX=9606 GN=RRM1 PE=1 SV=1	RRM1	-0.3548	0.841233	TRUE			0.0750838
Q9BXP5	6	13	Serrate RNA effector molecule homolog OS=Homo sapiens OX=9606 GN=SRRT PE=1 SV=1	SRRT	0.194845	0.845057	TRUE			0.0731139
P54132	6	8	Bloom syndrome protein OS=Homo sapiens OX=9606 GN=BLM PE=1 SV=1	BLM	-0.773602	0.856265	TRUE			0.0673919
P37802	6	21	Transgelin-2 OS=Homo sapiens OX=9606 GN=TAGLN2 PE=1 SV=3	TAGLN2	-0.220417	0.857109	TRUE			0.066964
O75962	6	11	Triple functional domain protein OS=Homo sapiens OX=9606 GN=TRIO PE=1 SV=2	TRIO	-0.387887	0.862166	TRUE			0.064409
P22392	6	15	Nucleoside diphosphate kinase B OS=Homo sapiens OX=9606 GN=NME2 PE=1 SV=1	NME2;NME1-NME2	-0.895607	0.862166	TRUE			0.064409
P30041	6	9	Peroxiredoxin-6 OS=Homo sapiens OX=9606 GN=PRDX6 PE=1 SV=3	PRDX6	-0.752348	0.874303	TRUE			0.0583379
Q9P0K7	6	12	Ankycorbin OS=Homo sapiens OX=9606 GN=RAI14 PE=1 SV=2	RAI14	0.21421	0.875594	TRUE			0.057697
Q8IXQ6	6	14	Protein mono-ADP-ribosyltransferase PARP9 OS=Homo sapiens OX=9606 GN=PARP9 PE=1 SV=2	PARP9	0.264023	0.876581	TRUE			0.0572078
Q9Y4J8	6	10	Dystrobrevin alpha OS=Homo sapiens OX=9606 GN=DTNA PE=1 SV=2	DTNA	0.224332	0.884506	TRUE			0.0532992
P23528	6	51	Cofilin-1 OS=Homo sapiens OX=9606 GN=CFL1 PE=1 SV=3	CFL1	-0.459654	0.884506	TRUE			0.0532992
Q15459	6	8	Splicing factor 3A subunit 1 OS=Homo sapiens OX=9606 GN=SF3A1 PE=1 SV=1	SF3A1	-0.242954	0.885561	TRUE			0.0527817
P34932	6	10	Heat shock 70 kDa protein 4 OS=Homo sapiens OX=9606 GN=HSPA4 PE=1 SV=4	HSPA4	-0.867154	0.885611	TRUE			0.052757
O75367	6	21	Core histone macro-H2A.1 OS=Homo sapiens OX=9606 GN=MACROH2A1 PE=1 SV=4	H2AFY	-0.241868	0.891932	TRUE			0.0496682
P47895	6	11	Aldehyde dehydrogenase family 1 member A3 OS=Homo sapiens OX=9606 GN=ALDH1A3 PE=1 SV=2	ALDH1A3	0.233923	0.902071	TRUE			0.0447594
P09382	6	31	Galectin-1 OS=Homo sapiens OX=9606 GN=LGALS1 PE=1 SV=2	LGALS1	-0.347375	0.902071	TRUE			0.0447594
Q969V3	6	30	Nicalin OS=Homo sapiens OX=9606 GN=NCLN PE=1 SV=2	NCLN	-0.127255	0.905319	TRUE			0.0431981
O95831	6	11	Apoptosis-inducing factor 1, mitochondrial OS=Homo sapiens OX=9606 GN=AIFM1 PE=1 SV=1	AIFM1	0.230789	0.905874	TRUE			0.0429322
Q04917	6	25	14-3-3 protein eta OS=Homo sapiens OX=9606 GN=YWHAH PE=1 SV=4	YWHAH	-0.334247	0.908411	TRUE			0.0417174
P54136	6	22	Arginine--tRNA ligase, cytoplasmic OS=Homo sapiens OX=9606 GN=RARS1 PE=1 SV=2	RARS	0.211247	0.910573	TRUE			0.0406852
Q5T6F2	6	13	Ubiquitin-associated protein 2 OS=Homo sapiens OX=9606 GN=UBAP2 PE=1 SV=1	UBAP2	-0.0894142	0.918164	TRUE			0.03708
A0A499FIX8	6	16	Extended synaptotagmin-2 OS=Homo sapiens OX=9606 GN=ESYT2 PE=1 SV=1		-0.227401	0.918164	TRUE			0.03708
P60228	6	18	Eukaryotic translation initiation factor 3 subunit E OS=Homo sapiens OX=9606 GN=EIF3E PE=1 SV=1	EIF3E	-0.12155	0.918385	TRUE			0.0369751
Q15046	6	10	Lysine--tRNA ligase OS=Homo sapiens OX=9606 GN=KARS1 PE=1 SV=3	KARS	-0.249758	0.918385	TRUE			0.0369751
Q96QK1	6	22	Vacuolar protein sorting-associated protein 35 OS=Homo sapiens OX=9606 GN=VPS35 PE=1 SV=2	VPS35	0.109656	0.919602	TRUE			0.0364003
Q9Y2Z2	6	14	Protein MTO1 homolog, mitochondrial OS=Homo sapiens OX=9606 GN=MTO1 PE=1 SV=2	MTO1	0.217394	0.922162	TRUE			0.0351929
A0A5H1ZRR9	6	15	Dystrophin OS=Homo sapiens OX=9606 GN=DMD PE=1 SV=1		0.106593	0.922162	TRUE			0.0351929
Q14697	6	17	Neutral alpha-glucosidase AB OS=Homo sapiens OX=9606 GN=GANAB PE=1 SV=3	GANAB	-0.15186	0.92337	TRUE			0.0346242
P20020	6	15	Plasma membrane calcium-transporting ATPase 1 OS=Homo sapiens OX=9606 GN=ATP2B1 PE=1 SV=4		0.263176	0.92461	TRUE			0.0340416
Q08AF3	6	18	Schlafen family member 5 OS=Homo sapiens OX=9606 GN=SLFN5 PE=1 SV=1	SLFN5	0.226123	0.92461	TRUE			0.0340416
O00303	6	19	Eukaryotic translation initiation factor 3 subunit F OS=Homo sapiens OX=9606 GN=EIF3F PE=1 SV=1	EIF3F	0.122582	0.926926	TRUE			0.0329549
Q9BSJ2	6	10	Gamma-tubulin complex component 2 OS=Homo sapiens OX=9606 GN=TUBGCP2 PE=1 SV=2	TUBGCP2	0.115929	0.933441	TRUE			0.0299132
Q14444	6	32	Caprin-1 OS=Homo sapiens OX=9606 GN=CAPRIN1 PE=1 SV=2	CAPRIN1	0.109178	0.934864	TRUE			0.0292515
P62805	6	58	Histone H4 OS=Homo sapiens OX=9606 GN=H4C1 PE=1 SV=2	HIST1H4A;HIST1H4F;HIST1H4D;HIST1H4J;HIST2H4A;HIST2H4B;HIST1H4H;HIST1H4C;HIST4H4;HIST1H4E;HIST1H4I;HIST1H4B;HIST1H4K;HIST1H4L	0.32445	0.935881	TRUE			0.0287793
P62937	6	23	Peptidyl-prolyl cis-trans isomerase A OS=Homo sapiens OX=9606 GN=PPIA PE=1 SV=2	PPIA	0.403272	0.93825	TRUE			0.0276816
A0A0C4DGG8	6	15	Cell division cycle and apoptosis regulator protein 1 (Fragment) OS=Homo sapiens OX=9606 GN=CCAR1 PE=1 SV=1	CCAR1	0.102207	0.93825	TRUE			0.0276816
Q9Y383	6	10	Putative RNA-binding protein Luc7-like 2 OS=Homo sapiens OX=9606 GN=LUC7L2 PE=1 SV=2	LUC7L2	-0.48331	0.93825	TRUE			0.0276816
P21281	6	17	V-type proton ATPase subunit B, brain isoform OS=Homo sapiens OX=9606 GN=ATP6V1B2 PE=1 SV=3	ATP6V1B2	-0.148512	0.939086	TRUE			0.0272948
P38159	6	10	RNA-binding motif protein, X chromosome OS=Homo sapiens OX=9606 GN=RBMX PE=1 SV=3	RBMX	-0.134133	0.941217	TRUE			0.0263104
Q16822	6	14	Phosphoenolpyruvate carboxykinase [GTP], mitochondrial OS=Homo sapiens OX=9606 GN=PCK2 PE=1 SV=4		-0.262891	0.941217	TRUE			0.0263104
Q9NUQ8	6	17	ATP-binding cassette sub-family F member 3 OS=Homo sapiens OX=9606 GN=ABCF3 PE=1 SV=2	ABCF3	0.126518	0.941894	TRUE			0.0259981
Q13347	6	19	Eukaryotic translation initiation factor 3 subunit I OS=Homo sapiens OX=9606 GN=EIF3I PE=1 SV=1	EIF3I	0.262569	0.942197	TRUE			0.0258585
P29401	6	16	Transketolase OS=Homo sapiens OX=9606 GN=TKT PE=1 SV=3	TKT	0.132473	0.942439	TRUE			0.0257466
O75396	6	21	Vesicle-trafficking protein SEC22b OS=Homo sapiens OX=9606 GN=SEC22B PE=1 SV=4	SEC22B	0.081008	0.945361	TRUE			0.0244021
Q07666	6	25	KH domain-containing, RNA-binding, signal transduction-associated protein 1 OS=Homo sapiens OX=9606 GN=KHDRBS1 PE=1 SV=1	KHDRBS1	-0.0609497	0.953814	TRUE			0.0205363
P49959	6	12	Double-strand break repair protein MRE11 OS=Homo sapiens OX=9606 GN=MRE11 PE=1 SV=3	MRE11A;MRE11	0.122125	0.95522	TRUE			0.0198966
P22090	6	20	40S ribosomal protein S4, Y isoform 1 OS=Homo sapiens OX=9606 GN=RPS4Y1 PE=1 SV=2	RPS4Y1	0.157074	0.959519	TRUE			0.0179464
Q16778	6	46	Histone H2B type 2-E OS=Homo sapiens OX=9606 GN=H2BC21 PE=1 SV=3	HIST2H2BE	-0.0895702	0.959519	TRUE			0.0179464
O15371	6	11	Eukaryotic translation initiation factor 3 subunit D OS=Homo sapiens OX=9606 GN=EIF3D PE=1 SV=1	EIF3D	-0.202675	0.959519	TRUE			0.0179464
G5EA31	6	11	Protein transport protein Sec24C OS=Homo sapiens OX=9606 GN=SEC24C PE=1 SV=1	SEC24C	0.0784631	0.961689	TRUE			0.0169655
A0A6Q8PF96	6	21	Centrosome and spindle pole-associated protein 1 OS=Homo sapiens OX=9606 GN=CSPP1 PE=4 SV=1		0.0971222	0.964526	TRUE			0.0156859
P61981	6	28	14-3-3 protein gamma OS=Homo sapiens OX=9606 GN=YWHAG PE=1 SV=2	YWHAG	-0.138458	0.972028	TRUE			0.0123214
O95573	6	12	Long-chain-fatty-acid--CoA ligase 3 OS=Homo sapiens OX=9606 GN=ACSL3 PE=1 SV=3	ACSL3	-0.0737291	0.972633	TRUE			0.012051
E7EUN2	6	12	Arf-GAP with GTPase, ANK repeat and PH domain-containing protein 1 OS=Homo sapiens OX=9606 GN=AGAP1 PE=1 SV=1		-0.0400949	0.973478	TRUE			0.0116737
Q9UJV9	6	16	Probable ATP-dependent RNA helicase DDX41 OS=Homo sapiens OX=9606 GN=DDX41 PE=1 SV=2	DDX41	-0.027726	0.982328	TRUE			0.00774345
O75190	6	31	DnaJ homolog subfamily B member 6 OS=Homo sapiens OX=9606 GN=DNAJB6 PE=1 SV=2	DNAJB6	-0.0954776	0.987365	TRUE			0.00552214
E9PC15	6	18	Acylglycerol kinase, mitochondrial OS=Homo sapiens OX=9606 GN=AGK PE=1 SV=1		-0.036597	0.988405	TRUE			0.0050651
Q00325	6	19	Phosphate carrier protein, mitochondrial OS=Homo sapiens OX=9606 GN=SLC25A3 PE=1 SV=2	SLC25A3	0.0169013	0.988828	TRUE			0.0048792
Q15084	6	81	Protein disulfide-isomerase A6 OS=Homo sapiens OX=9606 GN=PDIA6 PE=1 SV=1	PDIA6	-0.0192349	0.988828	TRUE			0.0048792
P36542	6	22	ATP synthase subunit gamma, mitochondrial OS=Homo sapiens OX=9606 GN=ATP5F1C PE=1 SV=1	ATP5C1	-0.0222973	0.988828	TRUE			0.0048792
Q9Y6C9	6	15	Mitochondrial carrier homolog 2 OS=Homo sapiens OX=9606 GN=MTCH2 PE=1 SV=1	MTCH2	-0.0542172	0.988828	TRUE			0.0048792
Q5JR04	6	13	RNA helicase OS=Homo sapiens OX=9606 GN=MOV10 PE=1 SV=1	MOV10	0.00759365	0.990168	TRUE			0.00429128
A0A1B0GTL5	6	11	Rab11 family-interacting protein 5 OS=Homo sapiens OX=9606 GN=RAB11FIP5 PE=1 SV=1	RAB11FIP5	0.00609782	0.993974	TRUE			0.00262515
E7EQG2	6	49	RNA helicase OS=Homo sapiens OX=9606 GN=EIF4A2 PE=1 SV=1		0.0133059	0.995224	TRUE			0.00207908
A0A5F9ZH07	6	11	Tyrosine-protein kinase (Fragment) OS=Homo sapiens OX=9606 GN=JAK1 PE=1 SV=1		0.0048179	0.995224	TRUE			0.00207908
Q8NBX0	6	27	Saccharopine dehydrogenase-like oxidoreductase OS=Homo sapiens OX=9606 GN=SCCPDH PE=1 SV=1	SCCPDH	-0.00645375	0.997287	TRUE			0.00117968
Q00537	6	15	Cyclin-dependent kinase 17 OS=Homo sapiens OX=9606 GN=CDK17 PE=1 SV=2	CDK17	0.00229184	0.998961	TRUE			0.000451402
A0A1W2PNX8	6	19	Protein unc-45 homolog A OS=Homo sapiens OX=9606 GN=UNC45A PE=1 SV=1		0.000577845	0.999437	TRUE			0.000244644
Q68CQ4	5	7	Digestive organ expansion factor homolog OS=Homo sapiens OX=9606 GN=DIEXF PE=1 SV=2	DIEXF	3.95377	0.0632114	TRUE			1.1992
P29353	5	16	SHC-transforming protein 1 OS=Homo sapiens OX=9606 GN=SHC1 PE=1 SV=4	SHC1	2.07864	0.076246	TRUE			1.11778
Q9H1H9	5	9	Kinesin-like protein KIF13A OS=Homo sapiens OX=9606 GN=KIF13A PE=1 SV=2	KIF13A	3.63511	0.0887959	TRUE			1.05161
Q9UBP9	5	14	PTB domain-containing engulfment adapter protein 1 OS=Homo sapiens OX=9606 GN=GULP1 PE=1 SV=1	GULP1	4.46237	0.0975724	TRUE			1.01067
Q6PD74	5	30	Alpha- and gamma-adaptin-binding protein p34 OS=Homo sapiens OX=9606 GN=AAGAB PE=1 SV=1	AAGAB	7.02799	0.11404	TRUE			0.942942
Q9P1Z2	5	8	Calcium-binding and coiled-coil domain-containing protein 1 OS=Homo sapiens OX=9606 GN=CALCOCO1 PE=1 SV=2	CALCOCO1	3.77378	0.156101	TRUE			0.806595
Q15311	5	7	RalA-binding protein 1 OS=Homo sapiens OX=9606 GN=RALBP1 PE=1 SV=3	RALBP1	3.62845	0.214102	TRUE			0.669378
Q7Z739	5	28	YTH domain-containing family protein 3 OS=Homo sapiens OX=9606 GN=YTHDF3 PE=1 SV=1	YTHDF3	0.892746	0.22132	TRUE			0.65498
Q6P1M0	5	9	Long-chain fatty acid transport protein 4 OS=Homo sapiens OX=9606 GN=SLC27A4 PE=1 SV=1	SLC27A4	0.512275	0.262568	TRUE			0.580759
E7EVX8	5	16	Pre-mRNA-processing factor 31 OS=Homo sapiens OX=9606 GN=PRPF31 PE=1 SV=1		0.825643	0.269742	TRUE			0.569052
Q5T0W9	5	10	Protein FAM83B OS=Homo sapiens OX=9606 GN=FAM83B PE=1 SV=1	FAM83B	0.521096	0.269742	TRUE			0.569052
P23229	5	6	Integrin alpha-6 OS=Homo sapiens OX=9606 GN=ITGA6 PE=1 SV=5	ITGA6	1.014	0.31708	TRUE			0.498831
P46783	5	24	40S ribosomal protein S10 OS=Homo sapiens OX=9606 GN=RPS10 PE=1 SV=1	RPS10	0.97775	0.33276	TRUE			0.477869
P43353	5	14	Aldehyde dehydrogenase family 3 member B1 OS=Homo sapiens OX=9606 GN=ALDH3B1 PE=1 SV=1	ALDH3B1	0.771193	0.33276	TRUE			0.477869
Q9Y5A9	5	23	YTH domain-containing family protein 2 OS=Homo sapiens OX=9606 GN=YTHDF2 PE=1 SV=2	YTHDF2	0.415242	0.337902	TRUE			0.47121
Q99536	5	11	Synaptic vesicle membrane protein VAT-1 homolog OS=Homo sapiens OX=9606 GN=VAT1 PE=1 SV=2	VAT1	0.577105	0.349415	TRUE			0.456658
H0Y8P3	5	12	LIM and calponin homology domains-containing protein 1 (Fragment) OS=Homo sapiens OX=9606 GN=LIMCH1 PE=1 SV=1		0.985386	0.354895	TRUE			0.4499
P14923	5	15	Junction plakoglobin OS=Homo sapiens OX=9606 GN=JUP PE=1 SV=3	JUP	-0.708214	0.37381	TRUE			0.427349
P31942	5	19	Heterogeneous nuclear ribonucleoprotein H3 OS=Homo sapiens OX=9606 GN=HNRNPH3 PE=1 SV=2	HNRNPH3	0.450684	0.392158	TRUE			0.406539
Q15124	5	11	Phosphoglucomutase-like protein 5 OS=Homo sapiens OX=9606 GN=PGM5 PE=1 SV=2	PGM5	-0.872812	0.397988	TRUE			0.40013
P67936	5	9	Tropomyosin alpha-4 chain OS=Homo sapiens OX=9606 GN=TPM4 PE=1 SV=3	TPM4	-3.14791	0.410762	TRUE			0.386409
Q9NUQ6	5	9	SPATS2-like protein OS=Homo sapiens OX=9606 GN=SPATS2L PE=1 SV=2	SPATS2L	0.729184	0.480766	TRUE			0.318066
Q01780	5	16	Exosome component 10 OS=Homo sapiens OX=9606 GN=EXOSC10 PE=1 SV=2	EXOSC10	0.804714	0.481038	TRUE			0.317821
P49207	5	10	60S ribosomal protein L34 OS=Homo sapiens OX=9606 GN=RPL34 PE=1 SV=3	RPL34	1.98914	0.521069	TRUE			0.283105
Q01518	5	11	Adenylyl cyclase-associated protein 1 OS=Homo sapiens OX=9606 GN=CAP1 PE=1 SV=5	CAP1	-1.92651	0.522323	TRUE			0.282061
Q12797	5	10	Aspartyl/asparaginyl beta-hydroxylase OS=Homo sapiens OX=9606 GN=ASPH PE=1 SV=3	ASPH	2.21758	0.525263	TRUE			0.279623
Q9UJF2	5	15	Ras GTPase-activating protein nGAP OS=Homo sapiens OX=9606 GN=RASAL2 PE=1 SV=2	RASAL2	0.668949	0.526689	TRUE			0.278446
E7ETU9	5	20	Procollagen-lysine 5-dioxygenase OS=Homo sapiens OX=9606 GN=PLOD2 PE=1 SV=1		-0.473714	0.548229	TRUE			0.261038
Q15717	5	16	ELAV-like protein 1 OS=Homo sapiens OX=9606 GN=ELAVL1 PE=1 SV=2	ELAVL1	-0.539536	0.548832	TRUE			0.260561
Q9BYX2	5	13	TBC1 domain family member 2A OS=Homo sapiens OX=9606 GN=TBC1D2 PE=1 SV=3	TBC1D2	-0.321503	0.551795	TRUE			0.258222
Q9NQ29	5	5	Putative RNA-binding protein Luc7-like 1 OS=Homo sapiens OX=9606 GN=LUC7L PE=1 SV=1	LUC7L	-1.6785	0.557038	TRUE			0.254116
Q8NC51	5	16	Plasminogen activator inhibitor 1 RNA-binding protein OS=Homo sapiens OX=9606 GN=SERBP1 PE=1 SV=2	SERBP1	1.039	0.560974	TRUE			0.251058
O00268	5	5	Transcription initiation factor TFIID subunit 4 OS=Homo sapiens OX=9606 GN=TAF4 PE=1 SV=2	TAF4	-2.07733	0.566012	TRUE			0.247174
Q9C0C2	5	16	182 kDa tankyrase-1-binding protein OS=Homo sapiens OX=9606 GN=TNKS1BP1 PE=1 SV=4	TNKS1BP1	-0.267457	0.566875	TRUE			0.246513
D6RAX7	5	10	COP9 signalosome complex subunit 4 OS=Homo sapiens OX=9606 GN=COPS4 PE=1 SV=1	COPS4	0.616091	0.568459	TRUE			0.2453
Q86UK7	5	16	E3 ubiquitin-protein ligase ZNF598 OS=Homo sapiens OX=9606 GN=ZNF598 PE=1 SV=1	ZNF598	-0.534886	0.57908	TRUE			0.237261
Q9HBH1	5	18	Peptide deformylase, mitochondrial OS=Homo sapiens OX=9606 GN=PDF PE=1 SV=1	PDF	0.424851	0.582864	TRUE			0.234433
M0R3D6	5	14	60S ribosomal protein L18a (Fragment) OS=Homo sapiens OX=9606 GN=RPL18A PE=1 SV=1		0.885752	0.589017	TRUE			0.229872
Q8N6T3	5	14	ADP-ribosylation factor GTPase-activating protein 1 OS=Homo sapiens OX=9606 GN=ARFGAP1 PE=1 SV=2	ARFGAP1	0.791995	0.600614	TRUE			0.221404
Q6ZUT6	5	20	Coiled-coil domain-containing protein 9B OS=Homo sapiens OX=9606 GN=CCDC9B PE=1 SV=1	C15orf52;CCDC9B	0.747823	0.600646	TRUE			0.221382
Q96A65	5	19	Exocyst complex component 4 OS=Homo sapiens OX=9606 GN=EXOC4 PE=1 SV=1	EXOC4	0.360572	0.604285	TRUE			0.218758
P62136	5	40	Serine/threonine-protein phosphatase PP1-alpha catalytic subunit OS=Homo sapiens OX=9606 GN=PPP1CA PE=1 SV=1	PPP1CA	-0.476407	0.61694	TRUE			0.209757
P60866	5	28	40S ribosomal protein S20 OS=Homo sapiens OX=9606 GN=RPS20 PE=1 SV=1	RPS20	1.10239	0.634732	TRUE			0.19741
P51148	5	19	Ras-related protein Rab-5C OS=Homo sapiens OX=9606 GN=RAB5C PE=1 SV=2	RAB5C	-0.397544	0.634732	TRUE			0.19741
O60884	5	20	DnaJ homolog subfamily A member 2 OS=Homo sapiens OX=9606 GN=DNAJA2 PE=1 SV=1	DNAJA2	-0.423201	0.634732	TRUE			0.19741
Q5T4S7	5	9	E3 ubiquitin-protein ligase UBR4 OS=Homo sapiens OX=9606 GN=UBR4 PE=1 SV=1	UBR4	-1.0464	0.634732	TRUE			0.19741
P61224	5	16	Ras-related protein Rap-1b OS=Homo sapiens OX=9606 GN=RAP1B PE=1 SV=1	RAP1B	-0.519862	0.637178	TRUE			0.195739
P26232	5	15	Catenin alpha-2 OS=Homo sapiens OX=9606 GN=CTNNA2 PE=1 SV=5	CTNNA2	1.06386	0.649061	TRUE			0.187714
Q14566	5	6	DNA replication licensing factor MCM6 OS=Homo sapiens OX=9606 GN=MCM6 PE=1 SV=1	MCM6	-1.21071	0.653553	TRUE			0.184719
J3KR97	5	11	Tubulin-specific chaperone D OS=Homo sapiens OX=9606 GN=TBCD PE=1 SV=1	TBCD	0.340553	0.655291	TRUE			0.183566
Q9Y6M1	5	12	Insulin-like growth factor 2 mRNA-binding protein 2 OS=Homo sapiens OX=9606 GN=IGF2BP2 PE=1 SV=2	IGF2BP2	1.20004	0.658419	TRUE			0.181498
E9PEY4	5	10	Dystrobrevin OS=Homo sapiens OX=9606 GN=DTNB PE=1 SV=1	DTNB	-0.307833	0.67883	TRUE			0.168239
C9JIR6	5	8	Protein-serine/threonine phosphatase (Fragment) OS=Homo sapiens OX=9606 GN=PPM1B PE=1 SV=1		-2.87838	0.679563	TRUE			0.16777
C9JRZ6	5	13	MICOS complex subunit MIC19 OS=Homo sapiens OX=9606 GN=CHCHD3 PE=1 SV=2		-0.434575	0.68261	TRUE			0.165827
Q92804	5	9	TATA-binding protein-associated factor 2N OS=Homo sapiens OX=9606 GN=TAF15 PE=1 SV=1	TAF15	-1.31858	0.682863	TRUE			0.165667
A0A3B3IUA7	5	13	E3 ubiquitin/ISG15 ligase TRIM25 OS=Homo sapiens OX=9606 GN=TRIM25 PE=1 SV=1		0.740329	0.686081	TRUE			0.163624
E9PH82	5	16	Protein FAM98A OS=Homo sapiens OX=9606 GN=FAM98A PE=1 SV=1		-0.733284	0.69122	TRUE			0.160383
Q9UBF2	5	8	Coatomer subunit gamma-2 OS=Homo sapiens OX=9606 GN=COPG2 PE=1 SV=1	COPG2	-0.843412	0.692585	TRUE			0.159527
Q9ULH0	5	11	Kinase D-interacting substrate of 220 kDa OS=Homo sapiens OX=9606 GN=KIDINS220 PE=1 SV=3	KIDINS220	0.372101	0.697125	TRUE			0.156689
P11717	5	5	Cation-independent mannose-6-phosphate receptor OS=Homo sapiens OX=9606 GN=IGF2R PE=1 SV=3	IGF2R	-1.73938	0.697125	TRUE			0.156689
Q9Y597	5	9	BTB/POZ domain-containing protein KCTD3 OS=Homo sapiens OX=9606 GN=KCTD3 PE=1 SV=2	KCTD3	-0.900843	0.707687	TRUE			0.150159
Q8NE71	5	16	ATP-binding cassette sub-family F member 1 OS=Homo sapiens OX=9606 GN=ABCF1 PE=1 SV=2	ABCF1	0.878643	0.72377	TRUE			0.140399
P27694	5	18	Replication protein A 70 kDa DNA-binding subunit OS=Homo sapiens OX=9606 GN=RPA1 PE=1 SV=2	RPA1	-0.406805	0.72377	TRUE			0.140399
Q13470	5	18	Non-receptor tyrosine-protein kinase TNK1 OS=Homo sapiens OX=9606 GN=TNK1 PE=1 SV=3	TNK1	-0.507989	0.727066	TRUE			0.138426
H3BVG0	5	8	Nuclear pore complex protein Nup93 OS=Homo sapiens OX=9606 GN=NUP93 PE=1 SV=1		-1.25987	0.727066	TRUE			0.138426
P62913	5	58	60S ribosomal protein L11 OS=Homo sapiens OX=9606 GN=RPL11 PE=1 SV=2	RPL11	0.703362	0.730401	TRUE			0.136439
H3BPE1	5	12	Microtubule-actin cross-linking factor 1, isoforms 1/2/3/5 OS=Homo sapiens OX=9606 GN=MACF1 PE=1 SV=1		-1.74654	0.737492	TRUE			0.132243
P23743	5	21	Diacylglycerol kinase alpha OS=Homo sapiens OX=9606 GN=DGKA PE=1 SV=3	DGKA	0.3242	0.741321	TRUE			0.129993
Q9Y295	5	14	Developmentally-regulated GTP-binding protein 1 OS=Homo sapiens OX=9606 GN=DRG1 PE=1 SV=1	DRG1	0.596125	0.753808	TRUE			0.122739
P63000	5	19	Ras-related C3 botulinum toxin substrate 1 OS=Homo sapiens OX=9606 GN=RAC1 PE=1 SV=1	RAC1	-0.529278	0.753808	TRUE			0.122739
P55884	5	14	Eukaryotic translation initiation factor 3 subunit B OS=Homo sapiens OX=9606 GN=EIF3B PE=1 SV=3	EIF3B	0.534802	0.754535	TRUE			0.122321
Q9UG63	5	9	ATP-binding cassette sub-family F member 2 OS=Homo sapiens OX=9606 GN=ABCF2 PE=1 SV=2	ABCF2	-0.599032	0.755075	TRUE			0.12201
Q8TEM1	5	17	Nuclear pore membrane glycoprotein 210 OS=Homo sapiens OX=9606 GN=NUP210 PE=1 SV=3	NUP210	-0.64416	0.755075	TRUE			0.12201
Q5JW28	5	11	Double-stranded RNA-binding protein Staufen homolog 1 (Fragment) OS=Homo sapiens OX=9606 GN=STAU1 PE=1 SV=1	STAU1	-1.13305	0.755075	TRUE			0.12201
P49736	5	10	DNA replication licensing factor MCM2 OS=Homo sapiens OX=9606 GN=MCM2 PE=1 SV=4	MCM2	-1.48724	0.755075	TRUE			0.12201
E9PDE8	5	13	Heat shock 70 kDa protein 4L OS=Homo sapiens OX=9606 GN=HSPA4L PE=1 SV=1	HSPA4L	-1.59883	0.759832	TRUE			0.119282
Q8NDZ4	5	12	Divergent protein kinase domain 2A OS=Homo sapiens OX=9606 GN=DIPK2A PE=1 SV=1	C3orf58	0.333166	0.760047	TRUE			0.119159
Q92793	5	9	CREB-binding protein OS=Homo sapiens OX=9606 GN=CREBBP PE=1 SV=3	CREBBP	-0.3901	0.764838	TRUE			0.116431
K7EMH1	5	22	60S ribosomal protein L22 (Fragment) OS=Homo sapiens OX=9606 GN=RPL22 PE=1 SV=1		0.504348	0.766719	TRUE			0.115364
Q9Y3M8	5	11	StAR-related lipid transfer protein 13 OS=Homo sapiens OX=9606 GN=STARD13 PE=1 SV=2	STARD13	-0.310148	0.769599	TRUE			0.113735
Q86WA8	5	11	Lon protease homolog 2, peroxisomal OS=Homo sapiens OX=9606 GN=LONP2 PE=1 SV=1	LONP2	0.575877	0.771738	TRUE			0.11253
Q14CN4	5	33	Keratin, type II cytoskeletal 72 OS=Homo sapiens OX=9606 GN=KRT72 PE=1 SV=2	KRT72	-0.755703	0.780624	TRUE			0.107558
O14874	5	44	[3-methyl-2-oxobutanoate dehydrogenase [lipoamide]] kinase, mitochondrial OS=Homo sapiens OX=9606 GN=BCKDK PE=1 SV=2	BCKDK	-0.358277	0.78291	TRUE			0.106288
A0A0A0MR02	5	24	Outer mitochondrial membrane protein porin 2 (Fragment) OS=Homo sapiens OX=9606 GN=VDAC2 PE=1 SV=1	VDAC2	-0.696816	0.78291	TRUE			0.106288
Q13188	5	12	Serine/threonine-protein kinase 3 OS=Homo sapiens OX=9606 GN=STK3 PE=1 SV=2	STK3	-0.361881	0.788025	TRUE			0.10346
P25398	5	26	40S ribosomal protein S12 OS=Homo sapiens OX=9606 GN=RPS12 PE=1 SV=3	RPS12	1.27901	0.788887	TRUE			0.102985
Q9Y5M8	5	15	Signal recognition particle receptor subunit beta OS=Homo sapiens OX=9606 GN=SRPRB PE=1 SV=3	SRPRB	-0.30733	0.797321	TRUE			0.0983669
Q9BW19	5	10	Kinesin-like protein KIFC1 OS=Homo sapiens OX=9606 GN=KIFC1 PE=1 SV=2	KIFC1	0.172303	0.797917	TRUE			0.0980423
Q9UKK3	5	15	Protein mono-ADP-ribosyltransferase PARP4 OS=Homo sapiens OX=9606 GN=PARP4 PE=1 SV=3	PARP4	-0.247464	0.800591	TRUE			0.0965891
Q8IWV8	5	6	E3 ubiquitin-protein ligase UBR2 OS=Homo sapiens OX=9606 GN=UBR2 PE=1 SV=1	UBR2	-0.44333	0.802686	TRUE			0.0954544
P08243	5	6	Asparagine synthetase [glutamine-hydrolyzing] OS=Homo sapiens OX=9606 GN=ASNS PE=1 SV=4	ASNS	-1.46267	0.805034	TRUE			0.0941857
P49790	5	16	Nuclear pore complex protein Nup153 OS=Homo sapiens OX=9606 GN=NUP153 PE=1 SV=2	NUP153	-0.513926	0.805591	TRUE			0.0938855
Q15020	5	10	Squamous cell carcinoma antigen recognized by T-cells 3 OS=Homo sapiens OX=9606 GN=SART3 PE=1 SV=1	SART3	0.533119	0.808159	TRUE			0.0925032
Q9HCD6	5	14	Protein TANC2 OS=Homo sapiens OX=9606 GN=TANC2 PE=1 SV=3	TANC2	0.240059	0.808159	TRUE			0.0925032
O95817	5	10	BAG family molecular chaperone regulator 3 OS=Homo sapiens OX=9606 GN=BAG3 PE=1 SV=3	BAG3	0.274304	0.80988	TRUE			0.0915793
Q9BSJ8	5	19	Extended synaptotagmin-1 OS=Homo sapiens OX=9606 GN=ESYT1 PE=1 SV=1	ESYT1	-0.24369	0.815074	TRUE			0.0888032
Q9UBB4	5	10	Ataxin-10 OS=Homo sapiens OX=9606 GN=ATXN10 PE=1 SV=1	ATXN10	-0.854996	0.815074	TRUE			0.0888032
P23634	5	13	Plasma membrane calcium-transporting ATPase 4 OS=Homo sapiens OX=9606 GN=ATP2B4 PE=1 SV=2	ATP2B4	0.711242	0.822026	TRUE			0.0851142
Q9Y2W1	5	15	Thyroid hormone receptor-associated protein 3 OS=Homo sapiens OX=9606 GN=THRAP3 PE=1 SV=2	THRAP3	0.329505	0.824546	TRUE			0.0837851
Q13884	5	15	Beta-1-syntrophin OS=Homo sapiens OX=9606 GN=SNTB1 PE=1 SV=3	SNTB1	-0.164765	0.832166	TRUE			0.0797899
Q9NXS2	5	21	Glutaminyl-peptide cyclotransferase-like protein OS=Homo sapiens OX=9606 GN=QPCTL PE=1 SV=2	QPCTL	-0.178466	0.832166	TRUE			0.0797899
J3QRU8	5	13	ARF GTPase-activating protein GIT1 OS=Homo sapiens OX=9606 GN=GIT1 PE=1 SV=1		-0.148872	0.836206	TRUE			0.0776866
Q7L7L0	5	34	Histone H2A type 3 OS=Homo sapiens OX=9606 GN=H2AW PE=1 SV=3	HIST3H2A	0.404465	0.838006	TRUE			0.0767528
A0A6Q8PGZ8	5	10	Glycine--tRNA ligase OS=Homo sapiens OX=9606 GN=GARS1 PE=4 SV=1		-0.445448	0.849549	TRUE			0.0708115
Q05209	5	5	Tyrosine-protein phosphatase non-receptor type 12 OS=Homo sapiens OX=9606 GN=PTPN12 PE=1 SV=3	PTPN12	-0.898421	0.849734	TRUE			0.070717
Q9UQ80	5	7	Proliferation-associated protein 2G4 OS=Homo sapiens OX=9606 GN=PA2G4 PE=1 SV=3	PA2G4	-0.836617	0.851217	TRUE			0.0699595
Q16555	5	16	Dihydropyrimidinase-related protein 2 OS=Homo sapiens OX=9606 GN=DPYSL2 PE=1 SV=1	DPYSL2	0.212292	0.857109	TRUE			0.066964
Q9Y6Q9	5	6	Nuclear receptor coactivator 3 OS=Homo sapiens OX=9606 GN=NCOA3 PE=1 SV=1	NCOA3	-0.18317	0.86017	TRUE			0.0654155
P62191	5	12	26S proteasome regulatory subunit 4 OS=Homo sapiens OX=9606 GN=PSMC1 PE=1 SV=1	PSMC1	-0.136215	0.862166	TRUE			0.064409
P31948	5	6	Stress-induced-phosphoprotein 1 OS=Homo sapiens OX=9606 GN=STIP1 PE=1 SV=1	STIP1	-0.90547	0.870597	TRUE			0.0601828
Q13131	5	17	5'-AMP-activated protein kinase catalytic subunit alpha-1 OS=Homo sapiens OX=9606 GN=PRKAA1 PE=1 SV=4	PRKAA1	0.237123	0.872857	TRUE			0.0590569
P06748	5	22	Nucleophosmin OS=Homo sapiens OX=9606 GN=NPM1 PE=1 SV=2	NPM1	0.583513	0.873582	TRUE			0.0586963
Q16512	5	8	Serine/threonine-protein kinase N1 OS=Homo sapiens OX=9606 GN=PKN1 PE=1 SV=2	PKN1	0.399935	0.87599	TRUE			0.0575006
P52701	5	10	DNA mismatch repair protein Msh6 OS=Homo sapiens OX=9606 GN=MSH6 PE=1 SV=2	MSH6	-0.561121	0.882091	TRUE			0.0544864
A0A6Q8PFH9	5	19	Elongator complex protein 1 OS=Homo sapiens OX=9606 GN=ELP1 PE=4 SV=1		-0.266054	0.884506	TRUE			0.0532992
P98175	5	10	RNA-binding protein 10 OS=Homo sapiens OX=9606 GN=RBM10 PE=1 SV=3	RBM10	-0.379585	0.884506	TRUE			0.0532992
P62834	5	15	Ras-related protein Rap-1A OS=Homo sapiens OX=9606 GN=RAP1A PE=1 SV=1	RAP1A	-0.410765	0.884506	TRUE			0.0532992
O94776	5	12	Metastasis-associated protein MTA2 OS=Homo sapiens OX=9606 GN=MTA2 PE=1 SV=1	MTA2	0.326885	0.891627	TRUE			0.0498166
P55084	5	20	Trifunctional enzyme subunit beta, mitochondrial OS=Homo sapiens OX=9606 GN=HADHB PE=1 SV=3	HADHB	0.154412	0.893005	TRUE			0.0491462
P54886	5	13	Delta-1-pyrroline-5-carboxylate synthase OS=Homo sapiens OX=9606 GN=ALDH18A1 PE=1 SV=2	ALDH18A1	-0.287796	0.902071	TRUE			0.0447594
P40938	5	14	Replication factor C subunit 3 OS=Homo sapiens OX=9606 GN=RFC3 PE=1 SV=2	RFC3	-0.179542	0.905319	TRUE			0.0431981
O14828	5	18	Secretory carrier-associated membrane protein 3 OS=Homo sapiens OX=9606 GN=SCAMP3 PE=1 SV=3	SCAMP3	0.192699	0.905953	TRUE			0.0428941
H0YLM8	5	12	DmX-like protein 2 OS=Homo sapiens OX=9606 GN=DMXL2 PE=1 SV=2		0.236224	0.909602	TRUE			0.0411484
A0A024R571	5	8	EH domain-containing protein 1 OS=Homo sapiens OX=9606 GN=EHD1 PE=1 SV=1	EHD1	0.14618	0.910126	TRUE			0.0408984
Q9Y3F4	5	7	Serine-threonine kinase receptor-associated protein OS=Homo sapiens OX=9606 GN=STRAP PE=1 SV=1	STRAP	0.405185	0.921405	TRUE			0.0355496
H0Y368	5	26	Dolichol-phosphate mannosyltransferase subunit 1 (Fragment) OS=Homo sapiens OX=9606 GN=DPM1 PE=1 SV=1		0.294118	0.921405	TRUE			0.0355496
Q16777	5	36	Histone H2A type 2-C OS=Homo sapiens OX=9606 GN=H2AC20 PE=1 SV=4	HIST2H2AC	-0.481435	0.921405	TRUE			0.0355496
Q9UKV8	5	15	Protein argonaute-2 OS=Homo sapiens OX=9606 GN=AGO2 PE=1 SV=3	AGO2;EIF2C2	0.366914	0.922162	TRUE			0.0351929
P42224	5	11	Signal transducer and activator of transcription 1-alpha/beta OS=Homo sapiens OX=9606 GN=STAT1 PE=1 SV=2	STAT1	0.21657	0.922162	TRUE			0.0351929
Q86YV9	5	13	Hermansky-Pudlak syndrome 6 protein OS=Homo sapiens OX=9606 GN=HPS6 PE=1 SV=1	HPS6	0.275523	0.92361	TRUE			0.0345115
Q9H479	5	13	Fructosamine-3-kinase OS=Homo sapiens OX=9606 GN=FN3K PE=1 SV=1	FN3K	-0.189343	0.92461	TRUE			0.0340416
P16989	5	12	Y-box-binding protein 3 OS=Homo sapiens OX=9606 GN=YBX3 PE=1 SV=4	CSDA;YBX3	0.317784	0.926926	TRUE			0.0329549
Q13136	5	9	Liprin-alpha-1 OS=Homo sapiens OX=9606 GN=PPFIA1 PE=1 SV=1	PPFIA1	0.375001	0.935378	TRUE			0.0290127
Q13561	5	12	Dynactin subunit 2 OS=Homo sapiens OX=9606 GN=DCTN2 PE=1 SV=4	DCTN2	0.188115	0.93825	TRUE			0.0276816
P62820	5	9	Ras-related protein Rab-1A OS=Homo sapiens OX=9606 GN=RAB1A PE=1 SV=3	RAB1A	-0.256965	0.93825	TRUE			0.0276816
P17096	5	11	High mobility group protein HMG-I/HMG-Y OS=Homo sapiens OX=9606 GN=HMGA1 PE=1 SV=3	HMGA1	-0.536559	0.93825	TRUE			0.0276816
Q9UMS4	5	8	Pre-mRNA-processing factor 19 OS=Homo sapiens OX=9606 GN=PRPF19 PE=1 SV=1	PRPF19	0.409408	0.941217	TRUE			0.0263104
Q5JWF2	5	11	Guanine nucleotide-binding protein G(s) subunit alpha isoforms XLas OS=Homo sapiens OX=9606 GN=GNAS PE=1 SV=2	GNAS	0.25226	0.941894	TRUE			0.0259981
Q8TEW8	5	15	Partitioning defective 3 homolog B OS=Homo sapiens OX=9606 GN=PARD3B PE=1 SV=2	PARD3B	-0.0726919	0.941894	TRUE			0.0259981
P22102	5	7	Trifunctional purine biosynthetic protein adenosine-3 OS=Homo sapiens OX=9606 GN=GART PE=1 SV=1	GART	-0.371793	0.941894	TRUE			0.0259981
P38919	5	16	Eukaryotic initiation factor 4A-III OS=Homo sapiens OX=9606 GN=EIF4A3 PE=1 SV=4	EIF4A3	0.080791	0.942439	TRUE			0.0257466
P53618	5	12	Coatomer subunit beta OS=Homo sapiens OX=9606 GN=COPB1 PE=1 SV=3	COPB1	-0.126622	0.942439	TRUE			0.0257466
P11388	5	7	DNA topoisomerase 2-alpha OS=Homo sapiens OX=9606 GN=TOP2A PE=1 SV=3	TOP2A	-0.52547	0.942439	TRUE			0.0257466
P35606	5	17	Coatomer subunit beta' OS=Homo sapiens OX=9606 GN=COPB2 PE=1 SV=2	COPB2	-0.0731232	0.946419	TRUE			0.0239167
Q99661	5	9	Kinesin-like protein KIF2C OS=Homo sapiens OX=9606 GN=KIF2C PE=1 SV=2	KIF2C	-0.118726	0.9547	TRUE			0.0201332
Q9UBU9	5	9	Nuclear RNA export factor 1 OS=Homo sapiens OX=9606 GN=NXF1 PE=1 SV=1	NXF1	-0.308765	0.9547	TRUE			0.0201332
Q9H2D6	5	13	TRIO and F-actin-binding protein OS=Homo sapiens OX=9606 GN=TRIOBP PE=1 SV=3	TRIOBP	-0.0859911	0.955573	TRUE			0.0197361
O76094	5	9	Signal recognition particle subunit SRP72 OS=Homo sapiens OX=9606 GN=SRP72 PE=1 SV=3	SRP72	0.159574	0.959519	TRUE			0.0179464
G5E972	5	17	Lamina-associated polypeptide 2, isoforms beta/gamma OS=Homo sapiens OX=9606 GN=TMPO PE=1 SV=1	TMPO	-0.0996477	0.961689	TRUE			0.0169655
P46063	5	12	ATP-dependent DNA helicase Q1 OS=Homo sapiens OX=9606 GN=RECQL PE=1 SV=3	RECQL	0.137885	0.963896	TRUE			0.0159699
G5EA36	5	8	Cell division cycle 27, isoform CRA_c OS=Homo sapiens OX=9606 GN=CDC27 PE=1 SV=1	CDC27	0.143056	0.964526	TRUE			0.0156859
P23246	5	20	Splicing factor, proline- and glutamine-rich OS=Homo sapiens OX=9606 GN=SFPQ PE=1 SV=2	SFPQ	-0.109421	0.966997	TRUE			0.0145747
Q96AQ6	5	9	Pre-B-cell leukemia transcription factor-interacting protein 1 OS=Homo sapiens OX=9606 GN=PBXIP1 PE=1 SV=1	PBXIP1	-0.0662735	0.967018	TRUE			0.0145653
Q8IWX8	5	6	Calcium homeostasis endoplasmic reticulum protein OS=Homo sapiens OX=9606 GN=CHERP PE=1 SV=3	CHERP	0.126287	0.97026	TRUE			0.0131117
P51149	5	18	Ras-related protein Rab-7a OS=Homo sapiens OX=9606 GN=RAB7A PE=1 SV=1	RAB7A	-0.051817	0.97026	TRUE			0.0131117
Q5TDF0	5	21	Cancer-related nucleoside-triphosphatase OS=Homo sapiens OX=9606 GN=NTPCR PE=1 SV=1	NTPCR	0.0836408	0.972028	TRUE			0.0123214
Q99714	5	12	3-hydroxyacyl-CoA dehydrogenase type-2 OS=Homo sapiens OX=9606 GN=HSD17B10 PE=1 SV=3	HSD17B10	-0.0703143	0.972028	TRUE			0.0123214
Q92878	5	12	DNA repair protein RAD50 OS=Homo sapiens OX=9606 GN=RAD50 PE=1 SV=1	RAD50	0.0593306	0.979288	TRUE			0.00908978
P62195	5	10	26S proteasome regulatory subunit 8 OS=Homo sapiens OX=9606 GN=PSMC5 PE=1 SV=1	PSMC5	0.0205553	0.981023	TRUE			0.00832062
I3L4J1	5	12	Vesicle-fusing ATPase (Fragment) OS=Homo sapiens OX=9606 PE=1 SV=3		0.0721945	0.981447	TRUE			0.00813315
O14745	5	10	Na(+)/H(+) exchange regulatory cofactor NHE-RF1 OS=Homo sapiens OX=9606 GN=SLC9A3R1 PE=1 SV=4	SLC9A3R1	-0.0576698	0.981447	TRUE			0.00813315
Q13554	5	7	Calcium/calmodulin-dependent protein kinase type II subunit beta OS=Homo sapiens OX=9606 GN=CAMK2B PE=1 SV=3	CAMK2B	0.0500577	0.983747	TRUE			0.00711665
P46459	5	10	Vesicle-fusing ATPase OS=Homo sapiens OX=9606 GN=NSF PE=1 SV=3	NSF	0.0206804	0.986211	TRUE			0.00603008
P29317	5	13	Ephrin type-A receptor 2 OS=Homo sapiens OX=9606 GN=EPHA2 PE=1 SV=2	EPHA2	-0.0211937	0.988388	TRUE			0.00507252
Q13043	5	14	Serine/threonine-protein kinase 4 OS=Homo sapiens OX=9606 GN=STK4 PE=1 SV=2	STK4	0.0797204	0.988828	TRUE			0.0048792
P11413	5	8	Glucose-6-phosphate 1-dehydrogenase OS=Homo sapiens OX=9606 GN=G6PD PE=1 SV=4	G6PD	0.0383923	0.988828	TRUE			0.0048792
P08240	5	8	Signal recognition particle receptor subunit alpha OS=Homo sapiens OX=9606 GN=SRPRA PE=1 SV=2	SRPR;SRPRA	-0.0347356	0.988828	TRUE			0.0048792
Q9NXW2	5	19	DnaJ homolog subfamily B member 12 OS=Homo sapiens OX=9606 GN=DNAJB12 PE=1 SV=5	DNAJB12	-0.0166831	0.98919	TRUE			0.00472046
Q15019	5	18	Septin-2 OS=Homo sapiens OX=9606 GN=SEPTIN2 PE=1 SV=1	44806	0.00873831	0.993555	TRUE			0.00280827
H0YMC0	4	19	Coiled-coil domain-containing protein 32 OS=Homo sapiens OX=9606 GN=CCDC32 PE=1 SV=1	CCDC32	5.52997	0.0543765	TRUE			1.26459
O43290	4	5	U4/U6.U5 tri-snRNP-associated protein 1 OS=Homo sapiens OX=9606 GN=SART1 PE=1 SV=1	SART1	1.7608	0.0606398	TRUE			1.21724
Q9NXC2	4	7	Glucose-fructose oxidoreductase domain-containing protein 1 OS=Homo sapiens OX=9606 GN=GFOD1 PE=1 SV=1	GFOD1	3.05175	0.118338	TRUE			0.926874
O15084	4	8	Serine/threonine-protein phosphatase 6 regulatory ankyrin repeat subunit A OS=Homo sapiens OX=9606 GN=ANKRD28 PE=1 SV=5	ANKRD28	2.99067	0.124657	TRUE			0.904284
P16144	4	10	Integrin beta-4 OS=Homo sapiens OX=9606 GN=ITGB4 PE=1 SV=5	ITGB4	1.5755	0.125736	TRUE			0.900541
O60524	4	10	Nuclear export mediator factor NEMF OS=Homo sapiens OX=9606 GN=NEMF PE=1 SV=4	NEMF	1.64574	0.165718	TRUE			0.78063
A0A0A0MSU2	4	5	Mitotic deacetylase-associated SANT domain protein (Fragment) OS=Homo sapiens OX=9606 GN=MIDEAS PE=1 SV=6		0.953913	0.177245	TRUE			0.751425
Q9NYJ8	4	8	TGF-beta-activated kinase 1 and MAP3K7-binding protein 2 OS=Homo sapiens OX=9606 GN=TAB2 PE=1 SV=1	TAB2	-1.17309	0.178296	TRUE			0.748858
H7C2W9	4	15	60S ribosomal protein L31 (Fragment) OS=Homo sapiens OX=9606 GN=RPL31 PE=1 SV=1		1.16361	0.200664	TRUE			0.69753
Q02978	4	17	Mitochondrial 2-oxoglutarate/malate carrier protein OS=Homo sapiens OX=9606 GN=SLC25A11 PE=1 SV=3	SLC25A11	-0.730283	0.211206	TRUE			0.675294
A0A0C4DGH3	4	8	Numb-like protein OS=Homo sapiens OX=9606 GN=NUMBL PE=1 SV=1	NUMBL	3.79098	0.219366	TRUE			0.658831
P62851	4	35	40S ribosomal protein S25 OS=Homo sapiens OX=9606 GN=RPS25 PE=1 SV=1	RPS25	1.45702	0.221702	TRUE			0.654229
Q8TAA9	4	14	Vang-like protein 1 OS=Homo sapiens OX=9606 GN=VANGL1 PE=1 SV=1	VANGL1	1.832	0.22779	TRUE			0.642465
P05198	4	13	Eukaryotic translation initiation factor 2 subunit 1 OS=Homo sapiens OX=9606 GN=EIF2S1 PE=1 SV=3	EIF2S1	0.598337	0.257013	TRUE			0.590045
P05362	4	5	Intercellular adhesion molecule 1 OS=Homo sapiens OX=9606 GN=ICAM1 PE=1 SV=2	ICAM1	-3.08831	0.259766	TRUE			0.585417
[truncated: 2,475 more rows]
