# Supplementary material for: CCDC32 stabilizes clathrin-coated pits and drives their invagination
Source: eLife. 2026 Jan 5;14:RP107039. doi: 10.7554/eLife.107039 (PMC12768407; doi:10.7554/eLife.107039)
Supplement: Figure 5—source data 2. [file elife-107039-fig5-data2.xlsx]

## Sheet: Tabelle1
Figure 5-Source Data 2-Numerical data to generate Figure 5F and I
Figure 5F					Figure 5I
	eGFP	eGFP-CCDC32(FL)				GST	GST-AP2-α-AD	GST-AP2-β-AD
1	0.133886	1			1	0.0285587	1	0.0919476
2	0.053601	1			2	0.0874215	1	0.0505581
3	0.039622	1			3	0.0448002	1	0.0507287
4	0.026508	1
