# Supplementary material for: CCDC32 stabilizes clathrin-coated pits and drives their invagination
Source: eLife. 2026 Jan 5;14:RP107039. doi: 10.7554/eLife.107039 (PMC12768407; doi:10.7554/eLife.107039)
Supplement: Figure 6—source data 1. [file elife-107039-fig6-data1.xlsx]

## Sheet: Tabelle1
		Figure 6-Source Data 2-Numerical data to generate Figure 6
Figure 6C											Figure 6E									Figure 6F							Figure 6G
	eGFP-CCDC32(FL)				eGFP-CCDC32(Δ78-98)						Time(s)	CLCa			eGFP-CCDC32(∆78-98)						ARPE mRb-CLCa
AP2-α	1	1	1	1	0.265908	0.04071	0.167699	0.272934				Mean	Upper Limit	Lower Limit	Mean	Upper Limit	Lower Limit				siControl	siCCDC32					eGFP-CCDC32(FL)	eGFP	eGFP-CCDC32(∆78-98)
AP2-σ	1	1	1		0	0	0.216565				-10	11.2492	11.7161	10.7824	3.33424	3.5953	3.07317					+eGFP-CCDC32(FL)	+eGFP	+eGFP-CCDC32(Δ78-98)			30.2067	22.5057	25.7576
AP2-β	1	1	1		0.766316	1.01438	0.978079				-8	11.6504	12.0825	11.2184	3.25756	3.49687	3.01825			1	0.88179	0.533587	0.416625	0.622125			26.0021	20.2936	20.9328
AP2-μ	1	1	1		1.17536	0.802851	1.0839				-6	10.9792	11.3979	10.5605	3.39711	3.61689	3.17732			2	0.829614	0.517293	0.45124	0.567059			29.0188	25.0104	18.9621
											-4	11.9363	12.2874	11.5851	3.33136	3.51895	3.14377			3	0.939416	0.764848	0.594505	0.643101			37.7534	17.2336	19.9759
											-2	14.7552	15.0989	14.4115	3.49244	3.71922	3.26566			4	1.20035	0.789941	0.613624	0.575578			33.8441	23.6228	21.5861
											0	24.833	25.2065	24.4595	3.6216	3.82315	3.42005			5	1.04494	0.785441	0.588412	0.616594			19.6787	28.2949	21.5152
											2	27.6692	27.9788	27.3596	3.62852	3.72241	3.53464			6	1.04138	0.926663	0.597575	0.613165			35.3902	29.4992	23.1304
											4	29.7833	30.1775	29.3891	3.72001	3.87143	3.5686			7	1.04243	0.93376	0.605156	0.574996			20.0277	22.9669	20.2232
											6	34.1252	34.7254	33.5249	3.96777	4.09678	3.83876			8	1.02008	1.00323	0.693411	0.566194			24.4236	19.0859	22.9724
											8	37.4346	38.0249	36.8443	3.76991	3.98918	3.55064										31.0012	22.4813	16.6172
											10	40.8858	41.4456	40.326	4.10596	4.3538	3.85812										26.5775	22.9281	23.0104
											12	43.619	44.2798	42.9581	4.24858	4.46438	4.03278										37.711	20.1408	23.8868
											14	45.6684	46.4325	44.9042	4.47573	4.62489	4.32657
											16	48.6231	49.467	47.7792	4.81753	4.95575	4.67932
											18	50.4109	51.0519	49.77	4.39583	4.50009	4.29158
											20	52.315	52.8868	51.7431	4.1804	4.35367	4.00714
											22	53.547	54.3429	52.7512	4.26107	4.41482	4.10731
											24	54.8255	55.4816	54.1695	4.39623	4.58657	4.2059
											26	55.4062	55.984	54.8285	4.28418	4.44657	4.12179
											28	56.5759	57.3007	55.8511	4.21163	4.35155	4.07172
											30	57.0815	57.7985	56.3644	4.39735	4.51593	4.27876
											32	57.228	57.8144	56.6417	4.39401	4.47746	4.31056
											34	57.8895	58.6107	57.1683	4.21765	4.3421	4.0932
											36	57.0893	57.8135	56.3652	4.24499	4.33279	4.15718
											38	55.7881	56.6562	54.9201	4.19092	4.37442	4.00743
											40	54.9481	55.7992	54.0969	4.07244	4.22223	3.92266
											42	52.1464	52.8054	51.4875	4.05265	4.16004	3.94527
											44	48.7775	49.8473	47.7076	4.08876	4.20939	3.96812
											46	43.3894	44.3393	42.4394	3.57847	3.69103	3.46591
											48	32.7965	33.4676	32.1254	3.22049	3.32295	3.11803
											50	13.1199	13.5846	12.6552	3.2533	3.35444	3.15216
											52	8.35321	8.5942	8.11223	3.17081	3.38429	2.95733
											54	7.84078	8.09008	7.59148	2.91657	3.0733	2.75984
											56	8.19391	8.49208	7.89574	2.96244	3.09626	2.82863
											58	8.32463	8.51723	8.13202	3.0049	3.24316	2.76664
