# Supplementary material for: CCDC32 stabilizes clathrin-coated pits and drives their invagination
Source: eLife. 2026 Jan 5;14:RP107039. doi: 10.7554/eLife.107039 (PMC12768407; doi:10.7554/eLife.107039)
Supplement: Figure 7—source data 1. [file elife-107039-fig7-data1.xlsx]

## Sheet: Tabelle1
Figure 7-Source Data 1-Numerical data to generate Figure 7
Figure 7C					Figure 7E									Figure 7F					Figure 7G
	eGFP-CCDC32(FL)	eGFP-CCDC32(1-54)			Time(s)	CLCa			eGFP-CCDC32(1-54)						eGFP-CCDC32(FL)	eGFP	eGFP-CCDC32(1-54)		eGFP-CCDC32(FL)	eGFP	eGFP-CCDC32(1-54)
1	1	0.18611				Mean	Upper Limit	Lower Limit	Mean	Upper Limit	Lower Limit			1	1.02	0.68255	0.613116		30.2067	22.5057	22.6454
2	1	0.010153			-10	14.3374	15.0223	13.6525	2.70204	2.99882	2.40526			2	0.98	0.520273	0.607491		26.0021	20.2936	22.131
3	1	0.104293			-8	14.186	15.0191	13.3529	2.38259	2.63258	2.13261			3	0.881859	0.685456	0.768427		29.0188	25.0104	26.1432
4	1	0.027339			-6	13.3035	13.7923	12.8147	2.67621	2.96802	2.38439			4	0.91079	0.7075	0.771703		37.7534	17.2336	15.2535
					-4	14.2222	14.6231	13.8212	2.43572	2.84043	2.03101			5	0.905602	0.678431	0.759373		33.8441	23.6228	27.9234
					-2	16.7122	17.2747	16.1497	2.59663	2.8652	2.32807			6	1.06843	0.688995	0.761605		19.6787	28.2949	20.1768
					0	26.4119	27.1474	25.6764	2.84284	3.15073	2.53495			7	1.07661	0.697736	0.733698		35.3902	29.4992	23.9747
					2	29.6961	30.3925	28.9996	3.22934	3.46766	2.99102			8	1.15671	0.799493	0.853349		20.0277	22.9669	22.5983
					4	32.6421	33.4002	31.8841	2.91064	3.16749	2.65379								24.4236	19.0859	23.6631
					6	35.9135	36.7003	35.1267	3.15183	3.28841	3.01525								31.0012	22.4813	27.2504
					8	38.2782	39.0467	37.5096	3.11775	3.30166	2.93383								26.5775	22.9281	32.1616
					10	40.6096	41.2165	40.0027	2.76145	3.09784	2.42507								37.711	20.1408	28.1233
					12	42.6242	43.268	41.9804	2.94038	3.12998	2.75078
					14	44.6148	45.3069	43.9227	3.33687	3.50366	3.17008
					16	45.6123	46.2539	44.9706	3.53049	3.7659	3.29508
					18	47.6401	48.4567	46.8234	3.27574	3.60499	2.94649
					20	50.1622	51.0703	49.254	3.15244	3.45572	2.84916
					22	50.3763	51.1279	49.6247	3.22336	3.3796	3.06712
					24	51.6207	52.4371	50.8042	3.33059	3.50204	3.15914
					26	52.5351	53.1908	51.8794	3.62789	3.80011	3.45567
					28	53.7189	54.564	52.8738	3.2955	3.57648	3.01453
					30	54.7831	55.5779	53.9882	3.51076	3.67583	3.34568
					32	55.3002	56.1956	54.4047	3.38666	3.55789	3.21544
					34	54.7827	55.7887	53.7766	3.1671	3.31043	3.02376
					36	54.9395	55.9169	53.9622	3.20686	3.31299	3.10073
					38	54.3106	55.1608	53.4604	3.44684	3.80356	3.09013
					40	53.1954	54.1574	52.2333	2.94795	3.22011	2.67579
					42	51.5711	52.4197	50.7225	3.12364	3.28947	2.9578
					44	48.1511	49.3585	46.9437	3.05696	3.28637	2.82755
					46	43.7824	45.2593	42.3055	2.7847	3.10062	2.46879
					48	34.3754	35.2681	33.4827	2.86974	3.05294	2.68655
					50	14.8631	16.2412	13.485	2.61068	2.8287	2.39267
					52	10.7976	11.7284	9.8669	2.38307	2.58711	2.17903
					54	9.99655	10.8571	9.13601	2.53623	2.82736	2.24509
					56	9.59839	10.8051	8.39164	2.42862	2.60859	2.24865
					58	10.2204	11.4428	8.99806	2.28839	2.6389	1.93787
