# Supplementary figures and images for: CCDC32 stabilizes clathrin-coated pits and drives their invagination
Source: eLife journal article supplement (doi:10.7554/elife.107039), 2025-06-11

## supplement 1C

### CCDC32

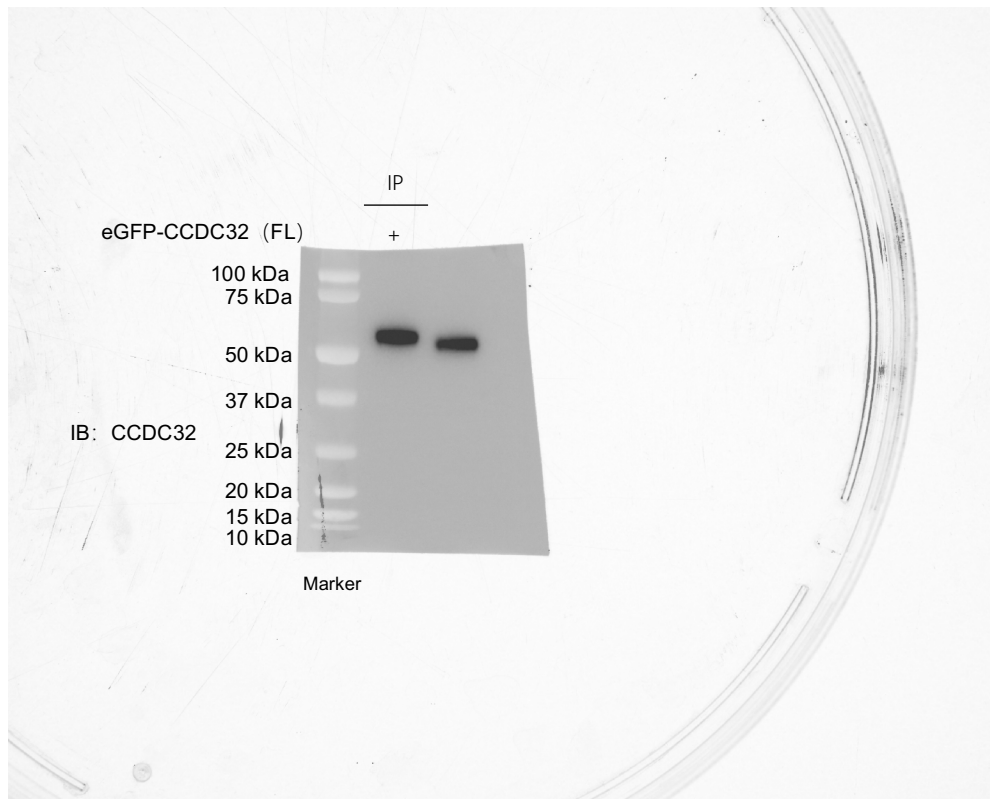

### supplement 1

(C) co-IP of eGFP-CCDC32 did not pulldown endogenous CCDC32.

Supplement: fig6-figsupp1-data1 [file Figure 6-figure supplement 6-source data 1.pdf › Figure 6-figure supplement 1-source data 1/Figure 6-figure supplement 6-source data 1.pdf]

7B

AP2- $\alpha$ 、GFP

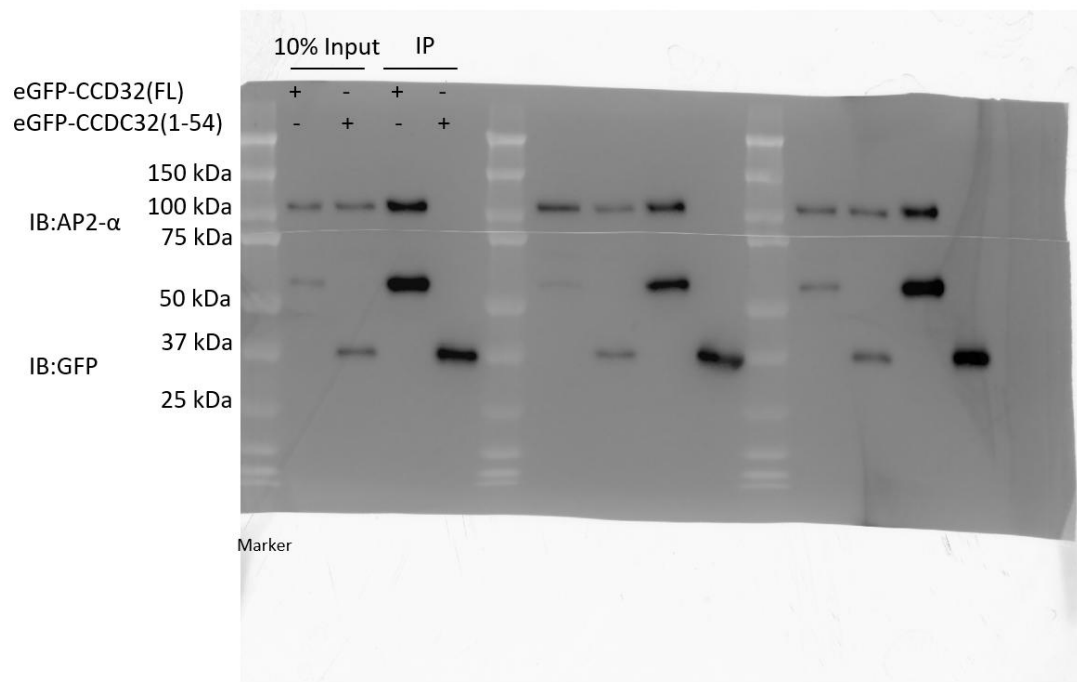

Figure 7

(B) Representative immunoblotting result of n=3 IP samples.

Supplement: fig7-data2 [file Figure 7-source data 2.pdf › Figure 7-source data 2/Figure 7-source data 2.pdf]
